# Supplementary material for: Destination shapes antibiotic resistance gene acquisitions, abundance increases, and diversity changes in Dutch travelers
Source: Genome Med. 2021 Jun 7;13:79. doi: 10.1186/s13073-021-00893-z (PMC8182900; doi:10.1186/s13073-021-00893-z)
Supplement: Supplementary file 2 — Additional file 2: Supplementary tables (S1-S9). [file 13073_2021_893_MOESM2_ESM.xlsx]

## Sheet: Table S1
Table S1: Netherland traveler cohort metadata
Gender	190
	Male	81 (42.6%)
	Female	109 (57.4%)
Age	47.3 (14.9)	190
Travel destination	190
	Northern Africa	43 (22.6%)
	Eastern Africa	44 (23.2%)
	Southern Asia	51 (26.8%)
	Southeastern Asia	52 (27.4%)
Travel duration	19.5 (12.1)	190
Reason for traveling	190
	Business or study	6 (3.16%)
	Holiday	170 (89.5%)
	Religious	10 (5.26%)
	Visiting relatives	4 (2.11%)
Travel accommodation	190
	Family or local	7 (3.68%)
	Hotel or apartments	61 (32.1%)
	Low budget	21 (11.1%)
	Luxury accomodation	30 (15.8%)
	Multiple accomodation	58 (30.5%)
	Others	5 (2.63%)
	Ship	1 (0.53%)
	Tent	7 (3.68%)
Health compared to pre-travel	190
	Comparable or better than before travel	154 (81.1%)
	Worse than before travel	36 (18.9%)
Diarrhea during travel	190
	No	101 (53.2%)
	Yes	89 (46.8%)
Diarrhea post-travel	190
	No	171 (90.0%)
	Yes	19 (10.0%)
Antibiotic use	190
	No	174 (91.6%)
	Unknown	6 (3.16%)
	Yes	10 (5.26%)
Chronic GI disease	190
	No	188 (98.9%)
	Yes	2 (1.05%)
Hospitalization during travel	190
	No	187 (98.4%)
	Yes	3 (1.58%)
Anti-acid use	190
	No	183 (96.3%)
	Yes	7 (3.68%)
Coticosteroid use	190
	No	176 (92.6%)
	Yes	14 (7.37%)
Immuno-suppressive use	190
	No	189 (99.5%)
	Yes	1 (0.53%)
Anti-diarrheal drug use	190
	No	141 (74.2%)
	Yes	49 (25.8%)
Food consumption in foodstalls	190
	Never	128 (67.4%)
	Sometimes	52 (27.4%)
	Almost daily	10 (5.26%)
Food consumption in relatives	190
	Never	163 (85.8%)
	Sometimes	23 (12.1%)
	Almost daily	4 (2.11%)
Food consumption in local streets	190
	Never	118 (62.1%)
	Sometimes	63 (33.2%)
	Almost daily	9 (4.74%)
Tap water consumption	190
	Never	169 (88.9%)
	Seldom	15 (7.89%)
	Occasionally	3 (1.58%)
	Often	1 (0.53%)
	Daily	2 (1.05%)
Raw vegetables consumption	190
	Never	19 (10.0%)
	Seldom	28 (14.7%)
	Occasionally	77 (40.5%)
	Often	51 (26.8%)
	Daily	15 (7.89%)
Salad consumption	190
	Never	34 (17.9%)
	Seldom	35 (18.4%)
	Occasionally	67 (35.3%)
	Often	44 (23.2%)
	Daily	10 (5.26%)

## Sheet: Table S2
Table S2: Model formulas for resistome alpha-diversity as a function of AMR gene abundance
Model	Formula
interaction	Richness~log(RPKM)*Timepoint+(1|Subject_id)
no interaction	Richness~log(RPKM)+Timepoint+(1|Subject_id)
nullTime	Richness~log(RPKM)+(1|Subject_id)
nullAbun	Richness~Timepoint+(1|Subject_id)
nullBoth	Richness~(1|Subject_id)

## Sheet: Table S3
Table S3: Model performance statistics for resistome alpha-diversity as a function of AMR gene abundance
Model	AIC	BIC	R2cnd	R2mrg	ICC	RMSE	BF	Performance
interaction	2864.74	2888.39	0.66	0.54	0.26	8.12	136.79	0.9427
no interaction	2878.52	2898.22	0.64	0.52	0.26	8.3	1	0.7759
nullTime	2939.95	2955.71	0.52	0.47	0.1	10.46	0	0.5318
nullAbun	3077.45	3093.21	0.48	0.17	0.37	9.71	0	0.475
nullBoth	3174.53	3186.35	0.13	0	0.13	13.76	0	0.0198

## Sheet: Table S4
Table S4: Results from best performing (interaction) model of resistome alpha-diversity as a function of AMR gene abundance
Parameter	Coeff	SE	CI low	CI high	t	p	Std_Coeff
(Intercept)	-50.31	6.6	-63.25	-37.36	-7.62	<0.001	-13.49
log(RPKM)	13.35	0.86	11.66	15.05	15.47	<0.001	6.47
Post-travel	45.34	10.01	25.73	64.96	4.53	<0.001	4.63
log(RPKM):Post-travel	-4.7	1.27	-7.19	-2.21	-3.7	<0.001	-2

## Sheet: Table S5
Table S5: E. coli resistance data for fluoroquinolones and 3rd gen cephalosporins from Resmap [https://resistancemap.cddep.org/AntibioticResistance.php] by the Center for Disease Dynamics, Economics, and Policy. Data from countries in our 4 cohort subregion destinations was included. To generate these data, bacterial isolates gathered in each country are tested for AMR against antibiotics using s…
Subregion	Country	Resistance (%)	95% CI	Isolates (#)	Bacteria	Antibiotic	Date
Northern Africa	Tunisia	19	12-29	78	E. coli	Fluoroquinolones	2017
Northern Africa	Tunisia	37	27-48	78	E. coli	Cephalosporins (3rd gen)	2017
Eastern Africa	Kenya	58	45-70	57	E. coli	Fluoroquinolones	2015
Eastern Africa	Kenya	51	38-64	57	E. coli	Cephalosporins (3rd gen)	2015
Eastern Africa	Malawi	42	39-45	1125	E. coli	Fluoroquinolones	2017
Eastern Africa	Malawi	72	69-75	1125	E. coli	Cephalosporins (3rd gen)	2017
Eastern Africa	Zambia	74	57-87	31	E. coli	Fluoroquinolones	2017
Eastern Africa	Zimbabwe	70	57-81	56	E. coli	Fluoroquinolones	2015
Eastern Africa	Zimbabwe	64	51-76	56	E. coli	Cephalosporins (3rd gen)	2015
Southern Asia	Pakistan	59	56-62	866	E. coli	Fluoroquinolones	2017
Southern Asia	Pakistan	86	83-89	458	E. coli	Cephalosporins (3rd gen)	2017
Southern Asia	India	84	82-86	1619	E. coli	Fluoroquinolones	2017
Southern Asia	India	77	75-79	1619	E. coli	Cephalosporins (3rd gen)	2017
Southeastern Asia	Thailand	47	43-51	596	E. coli	Fluoroquinolones	2017
Southeastern Asia	Thailand	42	38-46	603	E. coli	Cephalosporins (3rd gen)	2017
Southeastern Asia	Vietnam	66	63-69	1106	E. coli	Fluoroquinolones	2016
Southeastern Asia	Vietnam	71	68-74	1148	E. coli	Cephalosporins (3rd gen)	2016
Southeastern Asia	Malaysia	26	25-27	6227	E. coli	Fluoroquinolones	2017
Southeastern Asia	Malaysia	28	27-29	5939	E. coli	Cephalosporins (3rd gen)	2017
Southeastern Asia	Philippines	39	36-42	947	E. coli	Fluoroquinolones	2017
Southeastern Asia	Philippines	49	44-54	464	E. coli	Cephalosporins (3rd gen)	2017
Netherlands	Netherlands	16	15-17	6685	E. coli	Fluoroquinolones	2017
Netherlands	Netherlands	7	6-8	6684	E. coli	Cephalosporins (3rd gen)	2017

## Sheet: Table S6
Table S6: Results from MaAsLin2 model for AMR genes significantly associated with timepoint, travel destination, and 8 prevalent taxonomic families.
Shortbred_ID	metadata	value	coef	stderr	N.not.0	pval	qval	Product_Name	AMR_GeneFamily	AMR_Classification	Drug_Targets	AMR_Mechanism	Database_Source	Marker_Source
MF4599	Timepoint	Pre-travel	-0.0788589	0.0121536	188	6.98971e-10	4.57508e-08	bla_class_A	Unclassified beta-lactamase (Class A)	Class A Beta-lactamase	Determinant of Beta-lactam Resistance	Antibiotic Inactivation	Resfam	FxnlSlxns
MF7196	Timepoint	Pre-travel	-0.0681805	0.010562	262	8.31337e-10	5.20489e-08	blaTEM	TEM beta-lactamase (Class A)	Class A Beta-lactamase	Determinant of Beta-lactam Resistance	Antibiotic Inactivation	NCBI-AMR	FxnlSlxns
MF6791	Timepoint	Pre-travel	-0.0649305	0.0086947	151	6.00009e-13	8.64013e-11	AAC(6')-Ib7	AAC(6')	Aminoglycoside Acetyltransferase	Determinant of Aminoglycoside Resistance	Antibiotic Inactivation	CARD	ARDatabase
MF7201	Timepoint	Pre-travel	-0.0472152	0.00677405	155	1.47852e-11	1.77423e-09	trim_DfrA1_like	Trimethoprim Resistant Dihydrofolate Reductase (dfr)	Dihydrofolate reductase	Determinant of Diaminopyrimidine Resistance	Antibiotic Target Replacement	NCBI-AMR	FxnlSlxns
MF7533	Timepoint	Pre-travel	-0.0383276	0.00600913	188	1.28652e-09	7.41033e-08	aph(6)-Id	APH(6)	Aminoglycoside Phosphotransferase	Determinant of Aminoglycoside Resistance	Antibiotic Inactivation	NCBI-AMR	ARDatabase
MF7418	Timepoint	Pre-travel	-0.0379702	0.00559044	127	1.28211e-10	1.1539e-08	tet(A)	Tetracycline ABC Transporter	ABC Transporter	Determinant of Tetracycline Resistance	Antibiotic Efflux	CARD	ARDatabase
MF8358	Timepoint	Pre-travel	-0.0358162	0.00763676	64	5.08772e-06	0.000116291	trim_DfrA1_like	Trimethoprim Resistant Dihydrofolate Reductase (dfr)	Dihydrofolate reductase	Determinant of Diaminopyrimidine Resistance	Antibiotic Target Replacement	NCBI-AMR	FxnlSlxns
MF0298	Timepoint	Pre-travel	-0.0331764	0.00509578	175	6.25516e-10	4.28925e-08	aph(3'')-Ib	APH(3'')	Aminoglycoside Phosphotransferase	Determinant of Aminoglycoside Resistance	Antibiotic Inactivation	NCBI-AMR	ARDatabase
MF6427	Timepoint	Pre-travel	-0.0329977	0.00417946	274	2.18663e-13	3.49862e-11	mdtF	RND Antibiotic Efflux Pump	RND Efflux Pump	Determinant of Resistance to Multidrug Class	Antibiotic Efflux	CARD	ARDatabase
MF7378	Timepoint	Pre-travel	-0.0317273	0.00498988	281	1.46787e-09	8.12975e-08	YojI	ABC Transporter	ABC Transporter	Determinant of Resistance to Peptide Antibiotics	Antibiotic Efflux	CARD	ARDatabase
MF7466	Timepoint	Pre-travel	-0.0314054	0.00371131	228	6.44545e-15	1.54691e-12	ampC1	ampC-type beta-lactamase (Class C)	Class C Beta-lactamase	Determinant of Beta-lactam Resistance	Antibiotic Inactivation	CARD	ARDatabase
MF6428	Timepoint	Pre-travel	-0.0299175	0.00429218	286	5.26926e-11	5.83672e-09	mdtM	MFS Antibiotic Efflux Pump	MFS Efflux Pump	Determinant of Resistance to Multidrug Class	Antibiotic Efflux	CARD	ARDatabase
MF7209	Timepoint	Pre-travel	-0.0253508	0.00627494	56	6.51221e-05	0.00106563	trim_DfrA1_like	Trimethoprim Resistant Dihydrofolate Reductase (dfr)	Dihydrofolate reductase	Determinant of Diaminopyrimidine Resistance	Antibiotic Target Replacement	NCBI-AMR	FxnlSlxns
MF7296	Timepoint	Pre-travel	-0.0247369	0.00332034	136	2.90034e-12	3.79681e-10	tet_MFS_efflux	Tetracycline Resistance MFS Efflux Pump	MFS Efflux Pump	Determinant of Tetracycline Resistance	Antibiotic Efflux	Resfam	FxnlSlxns
MF6419	Timepoint	Pre-travel	-0.0246048	0.00626918	302	0.000121169	0.00186795	mdtC	RND Antibiotic Efflux Pump	RND Efflux Pump	Determinant of Resistance to Multidrug Class	Antibiotic Efflux	CARD	ARDatabase
MF7206	Timepoint	Pre-travel	-0.0241638	0.00548701	53	1.3972e-05	0.000287424	trim_DfrA1_like	Trimethoprim Resistant Dihydrofolate Reductase (dfr)	Dihydrofolate reductase	Determinant of Diaminopyrimidine Resistance	Antibiotic Target Replacement	NCBI-AMR	FxnlSlxns
MF7408	Timepoint	Pre-travel	-0.0224709	0.00369127	242	6.08532e-09	2.65541e-07	mphB	MphB macrolide phosphotransferase	Macrolide Phosphotransferase	Determinant of MLS Resistance	Antibiotic Inactivation	CARD	ARDatabase
MF6872	Timepoint	Pre-travel	-0.0212549	0.00503621	303	3.75253e-05	0.000684005	mdtN	MFS Antibiotic Efflux Pump	MFS Efflux Pump	Determinant of Resistance to Multidrug Class	Antibiotic Efflux	CARD	ARDatabase
MF8117	Timepoint	Pre-travel	-0.02117	0.00399641	87	2.03128e-07	6.35879e-06	aadA24	ANT(3'')	Aminoglycoside Nucleotidyltransferase	Determinant of Aminoglycoside Resistance	Antibiotic Inactivation	Resfinder	FxnlSlxns
MF6873	Timepoint	Pre-travel	-0.0203699	0.00603956	305	0.000901608	0.0107299	eptA	Pmr phosphoethanolamine transferase	Phosphoethanolamine Transferase	Determinant of Polymyxin Resistance	Antibiotic Target Alteration	CARD	ARDatabase
MF7178	Timepoint	Pre-travel	-0.0198067	0.00509976	60	0.000121935	0.00186795	trim_DfrA1_like	Trimethoprim Resistant Dihydrofolate Reductase (dfr)	Dihydrofolate reductase	Determinant of Diaminopyrimidine Resistance	Antibiotic Target Replacement	NCBI-AMR	FxnlSlxns
MF0500	Timepoint	Pre-travel	-0.0191488	0.00376865	115	5.98874e-07	1.62713e-05	sul1	Sulfonamide Resistant Dihydropteroate Synthase (sul)	Sulfonamide dihydropteroate synthase	Determinant of Sulfonamide Resistance	Antibiotic Target Replacement	NCBI-AMR	ARDatabase
MF7182	Timepoint	Pre-travel	-0.0169038	0.00282235	76	5.02837e-09	2.26277e-07	MphA	MphA macrolide phosphotransferase	Macrolide Phosphotransferase	Determinant of MLS Resistance	Antibiotic Inactivation	NCBI-AMR	FxnlSlxns
MF7445	Timepoint	Pre-travel	-0.0150727	0.00685862	299	0.0291672	0.156137	acrD	RND Antibiotic Efflux Pump	RND Efflux Pump	Efflux Pump Complex or Subunit Conferring Antibiotic Resistance	Antibiotic Efflux	CARD	ARDatabase
MF7455	Timepoint	Pre-travel	-0.0149382	0.00494107	299	0.00284115	0.0284115	ampH	ampC-type beta-lactamase (Class C)	Class C Beta-lactamase	Determinant of Beta-lactam Resistance	Antibiotic Inactivation	CARD	ARDatabase
MF7375	Timepoint	Pre-travel	-0.0141336	0.00552603	301	0.0113061	0.0818131	Escherichia coli acrA	RND Antibiotic Efflux Pump	RND Efflux Pump	Determinant of Resistance to Multidrug Class	Antibiotic Efflux	CARD	ARDatabase
MF7481	Timepoint	Pre-travel	-0.013097	0.00427674	85	0.00235789	0.024427	tet(A)	Tetracycline ABC Transporter	ABC Transporter	Determinant of Tetracycline Resistance	Antibiotic Efflux	CARD	FxnlSlxns
MF7515	Timepoint	Pre-travel	-0.0130778	0.00276588	100	3.23368e-06	7.6336e-05	ant(3'')-Ia	ANT(3'')	Aminoglycoside Nucleotidyltransferase	Determinant of Aminoglycoside Resistance	Antibiotic Inactivation	NCBI-AMR	ARDatabase
MF6418	Timepoint	Pre-travel	-0.012567	0.00569429	292	0.0284905	0.153848	mdtB	RND Antibiotic Efflux Pump	RND Efflux Pump	Determinant of Resistance to Multidrug Class	Antibiotic Efflux	CARD	ARDatabase
MF6868	Timepoint	Pre-travel	-0.0123725	0.003761	308	0.00119225	0.0137347	mdtE	RND Antibiotic Efflux Pump	RND Efflux Pump	Determinant of Resistance to Multidrug Class	Antibiotic Efflux	CARD	ARDatabase
MF7516	Timepoint	Pre-travel	-0.012263	0.00239752	91	7.54622e-07	1.97574e-05	aadA21	ANT(3'')	Aminoglycoside Nucleotidyltransferase	Determinant of Aminoglycoside Resistance	Antibiotic Inactivation	NCBI-AMR	ARDatabase
MF6616	Timepoint	Pre-travel	-0.0121298	0.00510166	298	0.0183924	0.11243	mdtG	MFS Antibiotic Efflux Pump	MFS Efflux Pump	Determinant of Resistance to Multidrug Class	Antibiotic Efflux	CARD	ARDatabase
MF7377	Timepoint	Pre-travel	-0.0114243	0.0053548	308	0.0341376	0.17432	msbA	ABC Transporter	ABC Transporter	Determinant of Resistance to Multidrug Class	Antibiotic Efflux	CARD	ARDatabase
MF6837	Timepoint	Pre-travel	-0.0107191	0.00302967	321	0.000505789	0.00644545	EmrK	MFS Antibiotic Efflux Pump	MFS Efflux Pump	Determinant of Resistance to Multidrug Class	Antibiotic Efflux	CARD	ARDatabase
MF6838	Timepoint	Pre-travel	-0.0103979	0.00333651	317	0.0021116	0.0230514	EmrY	MFS Antibiotic Efflux Pump	MFS Efflux Pump	Determinant of Resistance to Multidrug Class	Antibiotic Efflux	CARD	ARDatabase
MF6426	Timepoint	Pre-travel	-0.00990633	0.0049549	298	0.046959	0.224654	AcrF	RND Antibiotic Efflux Pump	RND Efflux Pump	Determinant of Resistance to Multidrug Class	Antibiotic Efflux	CARD	ARDatabase
MF6420	Timepoint	Pre-travel	-0.0098256	0.0025269	316	0.000138926	0.0020624	PmrF	Pmr phosphoethanolamine transferase	Phosphoethanolamine Transferase	Determinant of Polymyxin Resistance	Antibiotic Target Alteration	CARD	ARDatabase
MF7562	Timepoint	Pre-travel	-0.0094355	0.00248299	48	0.00016931	0.00246269	catA	CatA chloramphenicol acetyltransferase	Chloramphenicol Acetyltransferase	Determinant of Phenicol Resistance	Antibiotic Inactivation	NCBI-AMR	ARDatabase
MF6871	Timepoint	Pre-travel	-0.00882642	0.0040118	303	0.0289881	0.155757	mdtO	MFS Antibiotic Efflux Pump	MFS Efflux Pump	Determinant of Resistance to Multidrug Class	Antibiotic Efflux	CARD	ARDatabase
MF0522	Timepoint	Pre-travel	-0.0086348	0.00235238	57	0.000311097	0.0043075	tet(A)	Tetracycline MFS Antibiotic Efflux Pump	MFS Efflux Pump	Determinant of Tetracycline Resistance	Antibiotic Efflux	NCBI-AMR	ARDatabase
MF6840	Timepoint	Pre-travel	-0.00858793	0.00345256	317	0.013721	0.0923284	EmrA	MFS Antibiotic Efflux Pump	MFS Efflux Pump	Determinant of Resistance to Multidrug Class	Antibiotic Efflux	CARD	ARDatabase
MF6663	Timepoint	Pre-travel	-0.00847882	0.00390179	304	0.030983	0.16165	TolC	RND Antibiotic Efflux Pump	RND Efflux Pump	Determinant of Resistance to Multidrug Class	Antibiotic Efflux	CARD	ARDatabase
MF6651	Timepoint	Pre-travel	-0.00838773	0.00290268	55	0.00408586	0.0378628	dfrA14	Trimethoprim Resistant Dihydrofolate Reductase (dfr)	Dihydrofolate reductase	Determinant of Diaminopyrimidine Resistance	Antibiotic Target Replacement	CARD	ARDatabase
MF6415	Timepoint	Pre-travel	-0.00801597	0.00299446	311	0.00807337	0.0638772	mdtH	MFS Antibiotic Efflux Pump	MFS Efflux Pump	Determinant of Resistance to Multidrug Class	Antibiotic Efflux	CARD	ARDatabase
MF4727	Timepoint	Pre-travel	-0.00636783	0.00161969	48	0.000100907	0.00157942	ANT3	Unclassified Aminoglycoside Nucleotidyltransferase (ANT)	Aminoglycoside Nucleotidyltransferase	Determinant of Aminoglycoside Resistance	Antibiotic Inactivation	Resfam	FxnlSlxns
MF3792	Timepoint	Pre-travel	-0.00622312	0.00318364	298	0.0520375	0.243292	CMY-LAT-MOX-ACT-MIR-FOX	CMY-LAT-MOX-ACT-MIR-FOX beta-lactamase (Class C)	Class C Beta-lactamase	Determinant of Beta-lactam Resistance	Antibiotic Inactivation	Resfam	FxnlSlxns
MF7819	Timepoint	Pre-travel	-0.0037622	0.00170533	61	0.0285261	0.153848	cepA	CepA beta-lactamase (Class A)	Class A Beta-lactamase	Determinant of Beta-lactam Resistance	Antibiotic Inactivation	NCBI-AMR	ARDatabase
MF7646	Timepoint	Pre-travel	0.00578157	0.00156629	83	0.000289654	0.00404953	tet(44)	Tetracycline Resistance Ribosomal Protection Protein	Tetracycline ribosomal protection protein	Determinant of Tetracycline Resistance	Antibiotic Target Protection	NCBI-AMR	ARDatabase
MF0074	Timepoint	Pre-travel	0.00580214	0.00236942	319	0.0152551	0.0985086	mef(En2)	Macrolide MFS Antibiotic Efflux Pump	MFS Efflux Pump	Determinant of MLS Resistance	Antibiotic Efflux	NCBI-AMR	ARDatabase
MF3814	Timepoint	Pre-travel	0.00759338	0.00336123	68	0.0249877	0.141107	TetM-TetW-TetO-TetS	Tetracycline Resistance Ribosomal Protection Protein	Tetracycline ribosomal protection protein	Determinant of Tetracycline Resistance	Antibiotic Target Protection	Resfam	FxnlSlxns
MF0360	Timepoint	Pre-travel	0.00925376	0.00222587	171	4.83098e-05	0.000869577	aad9	ANT(9)	Aminoglycoside Nucleotidyltransferase	Determinant of Aminoglycoside Resistance	Antibiotic Inactivation	NCBI-AMR	ARDatabase
MF8345	Timepoint	Pre-travel	0.010169	0.00390864	83	0.0100014	0.0746218	TetM-TetW-TetO-TetS	Tetracycline Resistance Ribosomal Protection Protein	Tetracycline ribosomal protection protein	Determinant of Tetracycline Resistance	Antibiotic Target Protection	NCBI-AMR	FxnlSlxns
MF7572	Timepoint	Pre-travel	0.0120739	0.00502455	302	0.0172099	0.107749	cfxA	CfxA beta-lactamase (Class A)	Class A Beta-lactamase	Determinant of Beta-lactam Resistance	Antibiotic Inactivation	NCBI-AMR	ARDatabase
MF0350	Timepoint	Pre-travel	0.0128688	0.00310679	375	5.1511e-05	0.000893685	aadE	ANT(6)	Aminoglycoside Nucleotidyltransferase	Determinant of Aminoglycoside Resistance	Antibiotic Inactivation	NCBI-AMR	ARDatabase
MF3763	Timepoint	Pre-travel	0.0130091	0.00634378	236	0.0416356	0.206742	CblA	CblA beta-lactamase (Class A)	Class A Beta-lactamase	Determinant of Beta-lactam Resistance	Antibiotic Inactivation	CARD	FxnlSlxns
MF1224	Timepoint	Pre-travel	0.0137656	0.00480106	209	0.00459804	0.0419062	TetM-TetW-TetO-TetS	Tetracycline Resistance Ribosomal Protection Protein	Tetracycline ribosomal protection protein	Determinant of Tetracycline Resistance	Antibiotic Target Protection	Resfam	FxnlSlxns
MF7652	Timepoint	Pre-travel	0.0155564	0.00504046	380	0.0023271	0.024427	tet(M)	Tetracycline Resistance Ribosomal Protection Protein	Tetracycline ribosomal protection protein	Determinant of Tetracycline Resistance	Antibiotic Target Protection	NCBI-AMR	ARDatabase
MF0093	Timepoint	Pre-travel	0.0158445	0.00631539	344	0.0129661	0.0893357	tet(W)	Tetracycline Resistance Ribosomal Protection Protein	Tetracycline ribosomal protection protein	Determinant of Tetracycline Resistance	Antibiotic Target Protection	NCBI-AMR	ARDatabase
MF4600	Timepoint	Pre-travel	0.0166712	0.00384747	379	2.37337e-05	0.000461845	TetM-TetW-TetO-TetS	Tetracycline Resistance Ribosomal Protection Protein	Tetracycline ribosomal protection protein	Determinant of Tetracycline Resistance	Antibiotic Target Protection	Resfam	FxnlSlxns
MF7478	Timepoint	Pre-travel	0.0173202	0.00635408	341	0.00699672	0.0572459	tetO	Tetracycline Resistance Ribosomal Protection Protein	Tetracycline ribosomal protection protein	Determinant of Tetracycline Resistance	Antibiotic Target Protection	CARD	FxnlSlxns
MF4736	Timepoint	Pre-travel	0.0194315	0.00691604	341	0.00546569	0.0477624	TetM-TetW-TetO-TetS	Tetracycline Resistance Ribosomal Protection Protein	Tetracycline ribosomal protection protein	Determinant of Tetracycline Resistance	Antibiotic Target Protection	Resfam	FxnlSlxns
MF6416	Timepoint	Pre-travel	0.0242958	0.00809942	251	0.00305696	0.0301508	ugd	Pmr phosphoethanolamine transferase	Phosphoethanolamine Transferase	Determinant of Polymyxin Resistance	Antibiotic Target Alteration	CARD	ARDatabase
MF3849	Timepoint	Pre-travel	0.0258262	0.00706108	351	0.000327495	0.00449137	TetM-TetW-TetO-TetS	Tetracycline Resistance Ribosomal Protection Protein	Tetracycline ribosomal protection protein	Determinant of Tetracycline Resistance	Antibiotic Target Protection	Resfam	FxnlSlxns
MF7214	Timepoint	Pre-travel	0.0353802	0.00517852	89	1.0186e-10	9.91935e-09	CMY-LAT-MOX-ACT-MIR-FOX	CMY-LAT-MOX-ACT-MIR-FOX beta-lactamase (Class C)	Class C Beta-lactamase	Determinant of Beta-lactam Resistance	Antibiotic Inactivation	Resfam	FxnlSlxns
MF3617	Timepoint	Pre-travel	0.0397724	0.00609744	98	5.71545e-10	4.11512e-08	CMY-LAT-MOX-ACT-MIR-FOX	CMY-LAT-MOX-ACT-MIR-FOX beta-lactamase (Class C)	Class C Beta-lactamase	Determinant of Beta-lactam Resistance	Antibiotic Inactivation	Resfam	FxnlSlxns
MF3763	Travel_destination_subregion	Southeastern Asia	-0.0240859	0.00975983	236	0.0145238	0.0954987	CblA	CblA beta-lactamase (Class A)	Class A Beta-lactamase	Determinant of Beta-lactam Resistance	Antibiotic Inactivation	CARD	FxnlSlxns
MF4600	Travel_destination_subregion	Southeastern Asia	-0.0175929	0.00905251	379	0.0535315	0.245972	TetM-TetW-TetO-TetS	Tetracycline Resistance Ribosomal Protection Protein	Tetracycline ribosomal protection protein	Determinant of Tetracycline Resistance	Antibiotic Target Protection	Resfam	FxnlSlxns
MF7193	Travel_destination_subregion	Southern Asia	-0.0161668	0.00691026	209	0.0203808	0.121274	tet_protect_Q	Tetracycline Resistance Ribosomal Protection Protein	Tetracycline ribosomal protection protein	Determinant of Tetracycline Resistance	Antibiotic Target Protection	NCBI-AMR	FxnlSlxns
MF8278	Travel_destination_subregion	Southeastern Asia	-0.00769913	0.00339683	75	0.024592	0.139479	chloram_CatA	CatA chloramphenicol acetyltransferase	Chloramphenicol Acetyltransferase	Determinant of Phenicol Resistance	Antibiotic Inactivation	NCBI-AMR	FxnlSlxns
MF7562	Travel_destination_subregion	Southern Asia	-0.00707529	0.00352564	48	0.0455027	0.220619	catA	CatA chloramphenicol acetyltransferase	Chloramphenicol Acetyltransferase	Determinant of Phenicol Resistance	Antibiotic Inactivation	NCBI-AMR	ARDatabase
MF4727	Travel_destination_subregion	Southern Asia	0.00544485	0.00229982	48	0.018426	0.11243	ANT3	Unclassified Aminoglycoside Nucleotidyltransferase (ANT)	Aminoglycoside Nucleotidyltransferase	Determinant of Aminoglycoside Resistance	Antibiotic Inactivation	Resfam	FxnlSlxns
MF7646	Travel_destination_subregion	Southeastern Asia	0.00620554	0.00251755	83	0.0146414	0.0958344	tet(44)	Tetracycline Resistance Ribosomal Protection Protein	Tetracycline ribosomal protection protein	Determinant of Tetracycline Resistance	Antibiotic Target Protection	NCBI-AMR	ARDatabase
MF4727	Travel_destination_subregion	Southeastern Asia	0.00956589	0.00227224	48	3.21697e-05	0.000593902	ANT3	Unclassified Aminoglycoside Nucleotidyltransferase (ANT)	Aminoglycoside Nucleotidyltransferase	Determinant of Aminoglycoside Resistance	Antibiotic Inactivation	Resfam	FxnlSlxns
MF0500	Travel_destination_subregion	Eastern Africa	0.0112694	0.00553865	115	0.0426016	0.210812	sul1	Sulfonamide Resistant Dihydropteroate Synthase (sul)	Sulfonamide dihydropteroate synthase	Determinant of Sulfonamide Resistance	Antibiotic Target Replacement	NCBI-AMR	ARDatabase
MF7296	Travel_destination_subregion	Eastern Africa	0.0128031	0.00542588	136	0.0193405	0.11621	tet_MFS_efflux	Tetracycline Resistance MFS Efflux Pump	MFS Efflux Pump	Determinant of Tetracycline Resistance	Antibiotic Efflux	Resfam	FxnlSlxns
MF7182	Travel_destination_subregion	Southeastern Asia	0.013687	0.00395944	76	0.000610674	0.00758079	MphA	MphA macrolide phosphotransferase	Macrolide Phosphotransferase	Determinant of MLS Resistance	Antibiotic Inactivation	NCBI-AMR	FxnlSlxns
MF0522	Travel_destination_subregion	Southeastern Asia	0.0144722	0.00348785	57	5.09643e-05	0.000893685	tet(A)	Tetracycline MFS Antibiotic Efflux Pump	MFS Efflux Pump	Determinant of Tetracycline Resistance	Antibiotic Efflux	NCBI-AMR	ARDatabase
MF7182	Travel_destination_subregion	Southern Asia	0.0150318	0.0040075	76	0.000204679	0.00291819	MphA	MphA macrolide phosphotransferase	Macrolide Phosphotransferase	Determinant of MLS Resistance	Antibiotic Inactivation	NCBI-AMR	FxnlSlxns
MF6651	Travel_destination_subregion	Eastern Africa	0.0151345	0.00426597	55	0.000438956	0.00571016	dfrA14	Trimethoprim Resistant Dihydrofolate Reductase (dfr)	Dihydrofolate reductase	Determinant of Diaminopyrimidine Resistance	Antibiotic Target Replacement	CARD	ARDatabase
MF7458	Travel_destination_subregion	Eastern Africa	0.0152693	0.0061553	194	0.0140061	0.0933741	tetQ	Tetracycline Resistance Ribosomal Protection Protein	Tetracycline ribosomal protection protein	Determinant of Tetracycline Resistance	Antibiotic Target Protection	CARD	ARDatabase
MF7481	Travel_destination_subregion	Eastern Africa	0.0171366	0.00628536	85	0.00670932	0.0556816	tet(A)	Tetracycline ABC Transporter	ABC Transporter	Determinant of Tetracycline Resistance	Antibiotic Efflux	CARD	FxnlSlxns
MF7178	Travel_destination_subregion	Southern Asia	0.0184681	0.00724122	60	0.0111649	0.0813997	trim_DfrA1_like	Trimethoprim Resistant Dihydrofolate Reductase (dfr)	Dihydrofolate reductase	Determinant of Diaminopyrimidine Resistance	Antibiotic Target Replacement	NCBI-AMR	FxnlSlxns
MF7201	Travel_destination_subregion	Southern Asia	0.0187045	0.00961858	155	0.0525843	0.245053	trim_DfrA1_like	Trimethoprim Resistant Dihydrofolate Reductase (dfr)	Dihydrofolate reductase	Determinant of Diaminopyrimidine Resistance	Antibiotic Target Replacement	NCBI-AMR	FxnlSlxns
MF7209	Travel_destination_subregion	Southern Asia	0.0215339	0.00890987	56	0.0161419	0.103308	trim_DfrA1_like	Trimethoprim Resistant Dihydrofolate Reductase (dfr)	Dihydrofolate reductase	Determinant of Diaminopyrimidine Resistance	Antibiotic Target Replacement	NCBI-AMR	FxnlSlxns
MF7296	Travel_destination_subregion	Southeastern Asia	0.0226272	0.00518289	136	2.12318e-05	0.000424636	tet_MFS_efflux	Tetracycline Resistance MFS Efflux Pump	MFS Efflux Pump	Determinant of Tetracycline Resistance	Antibiotic Efflux	Resfam	FxnlSlxns
MF6791	Travel_destination_subregion	Southern Asia	0.0242808	0.0123457	151	0.0499667	0.235908	AAC(6')-Ib7	AAC(6')	Aminoglycoside Acetyltransferase	Determinant of Aminoglycoside Resistance	Antibiotic Inactivation	CARD	ARDatabase
MF7201	Travel_destination_subregion	Eastern Africa	0.0256009	0.00995558	155	0.0105184	0.0776742	trim_DfrA1_like	Trimethoprim Resistant Dihydrofolate Reductase (dfr)	Dihydrofolate reductase	Determinant of Diaminopyrimidine Resistance	Antibiotic Target Replacement	NCBI-AMR	FxnlSlxns
MF7418	Travel_destination_subregion	Eastern Africa	0.0269531	0.00894932	127	0.00296217	0.0294174	tet(A)	Tetracycline ABC Transporter	ABC Transporter	Determinant of Tetracycline Resistance	Antibiotic Efflux	CARD	ARDatabase
MF7201	Travel_destination_subregion	Southeastern Asia	0.0294186	0.00950323	155	0.00211471	0.0230514	trim_DfrA1_like	Trimethoprim Resistant Dihydrofolate Reductase (dfr)	Dihydrofolate reductase	Determinant of Diaminopyrimidine Resistance	Antibiotic Target Replacement	NCBI-AMR	FxnlSlxns
MF8358	Travel_destination_subregion	Southern Asia	0.0305545	0.0111474	64	0.00672819	0.0556816	trim_DfrA1_like	Trimethoprim Resistant Dihydrofolate Reductase (dfr)	Dihydrofolate reductase	Determinant of Diaminopyrimidine Resistance	Antibiotic Target Replacement	NCBI-AMR	FxnlSlxns
MF7178	Travel_destination_subregion	Southeastern Asia	0.0316921	0.00715438	60	1.24686e-05	0.000260213	trim_DfrA1_like	Trimethoprim Resistant Dihydrofolate Reductase (dfr)	Dihydrofolate reductase	Determinant of Diaminopyrimidine Resistance	Antibiotic Target Replacement	NCBI-AMR	FxnlSlxns
MF6791	Travel_destination_subregion	Eastern Africa	0.0333529	0.0127783	151	0.00942161	0.0716023	AAC(6')-Ib7	AAC(6')	Aminoglycoside Acetyltransferase	Determinant of Aminoglycoside Resistance	Antibiotic Inactivation	CARD	ARDatabase
MF7196	Travel_destination_subregion	Southern Asia	0.0350128	0.015707	262	0.0270243	0.148531	blaTEM	TEM beta-lactamase (Class A)	Class A Beta-lactamase	Determinant of Beta-lactam Resistance	Antibiotic Inactivation	NCBI-AMR	FxnlSlxns
MF7418	Travel_destination_subregion	Southeastern Asia	0.0374453	0.0085474	127	1.992e-05	0.000404011	tet(A)	Tetracycline ABC Transporter	ABC Transporter	Determinant of Tetracycline Resistance	Antibiotic Efflux	CARD	ARDatabase
MF0298	Travel_destination_subregion	Eastern Africa	0.0409036	0.00762324	175	2.43515e-07	7.30545e-06	aph(3'')-Ib	APH(3'')	Aminoglycoside Phosphotransferase	Determinant of Aminoglycoside Resistance	Antibiotic Inactivation	NCBI-AMR	ARDatabase
MF6791	Travel_destination_subregion	Southeastern Asia	0.0412221	0.0121977	151	0.000804137	0.00964964	AAC(6')-Ib7	AAC(6')	Aminoglycoside Acetyltransferase	Determinant of Aminoglycoside Resistance	Antibiotic Inactivation	CARD	ARDatabase
MF7533	Travel_destination_subregion	Eastern Africa	0.0420624	0.00910246	188	7.22521e-06	0.000157641	aph(6)-Id	APH(6)	Aminoglycoside Phosphotransferase	Determinant of Aminoglycoside Resistance	Antibiotic Inactivation	NCBI-AMR	ARDatabase
MF7209	Travel_destination_subregion	Southeastern Asia	0.042163	0.00880302	56	2.42904e-06	6.03072e-05	trim_DfrA1_like	Trimethoprim Resistant Dihydrofolate Reductase (dfr)	Dihydrofolate reductase	Determinant of Diaminopyrimidine Resistance	Antibiotic Target Replacement	NCBI-AMR	FxnlSlxns
MF7196	Travel_destination_subregion	Southeastern Asia	0.0451243	0.0155215	262	0.0041018	0.0378628	blaTEM	TEM beta-lactamase (Class A)	Class A Beta-lactamase	Determinant of Beta-lactam Resistance	Antibiotic Inactivation	NCBI-AMR	FxnlSlxns
MF8358	Travel_destination_subregion	Southeastern Asia	0.0525013	0.0110149	64	3.80894e-06	8.84657e-05	trim_DfrA1_like	Trimethoprim Resistant Dihydrofolate Reductase (dfr)	Dihydrofolate reductase	Determinant of Diaminopyrimidine Resistance	Antibiotic Target Replacement	NCBI-AMR	FxnlSlxns
MF4599	Travel_destination_subregion	Eastern Africa	0.0714031	0.0182286	188	0.000126489	0.00189733	bla_class_A	Unclassified beta-lactamase (Class A)	Class A Beta-lactamase	Determinant of Beta-lactam Resistance	Antibiotic Inactivation	Resfam	FxnlSlxns
MF3849	f__Enterobacteriaceae	f__Enterobacteriaceae	-0.00275455	0.000456931	351	4.1297e-09	2.05061e-07	TetM-TetW-TetO-TetS	Tetracycline Resistance Ribosomal Protection Protein	Tetracycline ribosomal protection protein	Determinant of Tetracycline Resistance	Antibiotic Target Protection	Resfam	FxnlSlxns
MF7652	f__Enterobacteriaceae	f__Enterobacteriaceae	-0.00265377	0.000336005	380	3.80196e-14	7.82117e-12	tet(M)	Tetracycline Resistance Ribosomal Protection Protein	Tetracycline ribosomal protection protein	Determinant of Tetracycline Resistance	Antibiotic Target Protection	NCBI-AMR	ARDatabase
MF4736	f__Enterobacteriaceae	f__Enterobacteriaceae	-0.00236716	0.000427485	341	5.87039e-08	2.06179e-06	TetM-TetW-TetO-TetS	Tetracycline Resistance Ribosomal Protection Protein	Tetracycline ribosomal protection protein	Determinant of Tetracycline Resistance	Antibiotic Target Protection	Resfam	FxnlSlxns
MF7572	f__Enterobacteriaceae	f__Enterobacteriaceae	-0.00194293	0.000371703	302	3.38196e-07	9.74004e-06	cfxA	CfxA beta-lactamase (Class A)	Class A Beta-lactamase	Determinant of Beta-lactam Resistance	Antibiotic Inactivation	NCBI-AMR	ARDatabase
MF7478	f__Enterobacteriaceae	f__Enterobacteriaceae	-0.00173051	0.000410851	341	3.2072e-05	0.000593902	tetO	Tetracycline Resistance Ribosomal Protection Protein	Tetracycline ribosomal protection protein	Determinant of Tetracycline Resistance	Antibiotic Target Protection	CARD	FxnlSlxns
MF0092	f__Enterobacteriaceae	f__Enterobacteriaceae	-0.00169569	0.000302052	368	4.02592e-08	1.44933e-06	tet(W)	Tetracycline Resistance Ribosomal Protection Protein	Tetracycline ribosomal protection protein	Determinant of Tetracycline Resistance	Antibiotic Target Protection	NCBI-AMR	ARDatabase
MF4600	f__Enterobacteriaceae	f__Enterobacteriaceae	-0.00166439	0.000272065	379	2.84363e-09	1.46244e-07	TetM-TetW-TetO-TetS	Tetracycline Resistance Ribosomal Protection Protein	Tetracycline ribosomal protection protein	Determinant of Tetracycline Resistance	Antibiotic Target Protection	Resfam	FxnlSlxns
MF0093	f__Enterobacteriaceae	f__Enterobacteriaceae	-0.00159052	0.000452993	344	0.000515131	0.00650692	tet(W)	Tetracycline Resistance Ribosomal Protection Protein	Tetracycline ribosomal protection protein	Determinant of Tetracycline Resistance	Antibiotic Target Protection	NCBI-AMR	ARDatabase
MF0089	f__Enterobacteriaceae	f__Enterobacteriaceae	-0.00118143	0.000342442	119	0.000626122	0.00764081	tet(M)	Tetracycline Resistance Ribosomal Protection Protein	Tetracycline ribosomal protection protein	Determinant of Tetracycline Resistance	Antibiotic Target Protection	NCBI-AMR	ARDatabase
MF0467	f__Enterobacteriaceae	f__Enterobacteriaceae	-0.00112599	0.00051714	147	0.030266	0.159645	mef(A)	Macrolide MFS Antibiotic Efflux Pump	MFS Efflux Pump	Determinant of MLS Resistance	Antibiotic Efflux	NCBI-AMR	ARDatabase
MF6670	f__Enterobacteriaceae	f__Enterobacteriaceae	-0.00106958	0.000282023	114	0.000176163	0.00253674	cfxA	CfxA beta-lactamase (Class A)	Class A Beta-lactamase	Determinant of Beta-lactam Resistance	Antibiotic Inactivation	CARD	ARDatabase
MF0443	f__Enterobacteriaceae	f__Enterobacteriaceae	-0.000952239	0.000308914	245	0.00221683	0.0238227	Erm	Erm 23S Ribosomal RNA Methyltransferase	23S rRNA Methyltransferase	Determinant of MLS Resistance	Antibiotic Target Alteration	NCBI-AMR	ARDatabase
MF0380	f__Enterobacteriaceae	f__Enterobacteriaceae	-0.000909453	0.000301428	234	0.00279558	0.0281513	lnu(AN2)	LnuAN2_Lincosamide Nucleotidyltransferase	Lincosamide Nucleotidyltransferase	Determinant of MLS Resistance	Antibiotic Inactivation	NCBI-AMR	ARDatabase
MF7206	f__Enterobacteriaceae	f__Enterobacteriaceae	-0.000882648	0.000316425	53	0.00555532	0.0481907	trim_DfrA1_like	Trimethoprim Resistant Dihydrofolate Reductase (dfr)	Dihydrofolate reductase	Determinant of Diaminopyrimidine Resistance	Antibiotic Target Replacement	NCBI-AMR	FxnlSlxns
MF0350	f__Enterobacteriaceae	f__Enterobacteriaceae	-0.000820879	0.000213172	375	0.000141314	0.00207644	aadE	ANT(6)	Aminoglycoside Nucleotidyltransferase	Determinant of Aminoglycoside Resistance	Antibiotic Inactivation	NCBI-AMR	ARDatabase
MF4777	f__Enterobacteriaceae	f__Enterobacteriaceae	-0.000806002	0.000397539	261	0.0433709	0.213884	CblA	CblA beta-lactamase (Class A)	Class A Beta-lactamase	Determinant of Beta-lactam Resistance	Antibiotic Inactivation	Resfam	FxnlSlxns
MF3814	f__Enterobacteriaceae	f__Enterobacteriaceae	-0.000763691	0.000215268	68	0.000440158	0.00571016	TetM-TetW-TetO-TetS	Tetracycline Resistance Ribosomal Protection Protein	Tetracycline ribosomal protection protein	Determinant of Tetracycline Resistance	Antibiotic Target Protection	Resfam	FxnlSlxns
MF6799	f__Enterobacteriaceae	f__Enterobacteriaceae	-0.000680916	0.000241868	73	0.00513706	0.0459463	tet(W/N/W)	Tetracycline Resistance Ribosomal Protection Protein	Tetracycline ribosomal protection protein	Determinant of Tetracycline Resistance	Antibiotic Target Protection	CARD	ARDatabase
MF0074	f__Enterobacteriaceae	f__Enterobacteriaceae	-0.000622265	0.000179519	319	0.000619247	0.0076215	mef(En2)	Macrolide MFS Antibiotic Efflux Pump	MFS Efflux Pump	Determinant of MLS Resistance	Antibiotic Efflux	NCBI-AMR	ARDatabase
MF3783	f__Enterobacteriaceae	f__Enterobacteriaceae	-0.000620512	0.000256108	48	0.0158837	0.102109	TetM-TetW-TetO-TetS	Tetracycline Resistance Ribosomal Protection Protein	Tetracycline ribosomal protection protein	Determinant of Tetracycline Resistance	Antibiotic Target Protection	Resfam	FxnlSlxns
MF7922	f__Enterobacteriaceae	f__Enterobacteriaceae	-0.000506446	0.00020246	257	0.012868	0.0893115	dfrF	Trimethoprim Resistant Dihydrofolate Reductase (dfr)	Dihydrofolate reductase	Determinant of Diaminopyrimidine Resistance	Antibiotic Target Replacement	NCBI-AMR	ARDatabase
MF0435	f__Enterobacteriaceae	f__Enterobacteriaceae	-0.000493738	0.000215556	253	0.0226533	0.132068	Erm	Erm 23S Ribosomal RNA Methyltransferase	23S rRNA Methyltransferase	Determinant of MLS Resistance	Antibiotic Target Alteration	NCBI-AMR	ARDatabase
MF7603	f__Enterobacteriaceae	f__Enterobacteriaceae	-0.000438675	0.000202247	84	0.0309322	0.16165	Erm	Erm 23S Ribosomal RNA Methyltransferase	23S rRNA Methyltransferase	Determinant of MLS Resistance	Antibiotic Target Alteration	NCBI-AMR	ARDatabase
MF7193	f__Enterobacteriaceae	f__Enterobacteriaceae	-0.000411169	0.000181059	209	0.0239054	0.137055	tet_protect_Q	Tetracycline Resistance Ribosomal Protection Protein	Tetracycline ribosomal protection protein	Determinant of Tetracycline Resistance	Antibiotic Target Protection	NCBI-AMR	FxnlSlxns
MF8119	f__Enterobacteriaceae	f__Enterobacteriaceae	-0.000387702	0.000196714	148	0.0495763	0.234835	tet(32)	Tetracycline Resistance Ribosomal Protection Protein	Tetracycline ribosomal protection protein	Determinant of Tetracycline Resistance	Antibiotic Target Protection	Resfinder	FxnlSlxns
MF4336	f__Enterobacteriaceae	f__Enterobacteriaceae	-0.000306448	7.19763e-05	47	2.62755e-05	0.000497851	bla_class_A	Unclassified beta-lactamase (Class A)	Class A Beta-lactamase	Determinant of Beta-lactam Resistance	Antibiotic Inactivation	Resfam	FxnlSlxns
MF7646	f__Enterobacteriaceae	f__Enterobacteriaceae	-0.000265904	9.65638e-05	83	0.00618711	0.0524085	tet(44)	Tetracycline Resistance Ribosomal Protection Protein	Tetracycline ribosomal protection protein	Determinant of Tetracycline Resistance	Antibiotic Target Protection	NCBI-AMR	ARDatabase
MF4484	f__Enterobacteriaceae	f__Enterobacteriaceae	-0.000173092	6.81667e-05	129	0.0115276	0.082999	bla_class_A	Unclassified beta-lactamase (Class A)	Class A Beta-lactamase	Determinant of Beta-lactam Resistance	Antibiotic Inactivation	Resfam	FxnlSlxns
MF0522	f__Enterobacteriaceae	f__Enterobacteriaceae	0.000427443	0.000139556	57	0.00235419	0.024427	tet(A)	Tetracycline MFS Antibiotic Efflux Pump	MFS Efflux Pump	Determinant of Tetracycline Resistance	Antibiotic Efflux	NCBI-AMR	ARDatabase
MF7408	f__Enterobacteriaceae	f__Enterobacteriaceae	0.000543419	0.000228058	242	0.0176909	0.109806	mphB	MphB macrolide phosphotransferase	Macrolide Phosphotransferase	Determinant of MLS Resistance	Antibiotic Inactivation	CARD	ARDatabase
MF7296	f__Enterobacteriaceae	f__Enterobacteriaceae	0.00054664	0.000201947	136	0.00711011	0.057845	tet_MFS_efflux	Tetracycline Resistance MFS Efflux Pump	MFS Efflux Pump	Determinant of Tetracycline Resistance	Antibiotic Efflux	Resfam	FxnlSlxns
MF8323	f__Enterobacteriaceae	f__Enterobacteriaceae	0.000572792	0.000196725	253	0.00381777	0.0359319	bla_class_C	Unclassified beta-lactamase (Class C)	Class C Beta-lactamase	Determinant of Beta-lactam Resistance	Antibiotic Inactivation	NCBI-AMR	FxnlSlxns
MF7466	f__Enterobacteriaceae	f__Enterobacteriaceae	0.000643276	0.000220903	228	0.00381061	0.0359319	ampC1	ampC-type beta-lactamase (Class C)	Class C Beta-lactamase	Determinant of Beta-lactam Resistance	Antibiotic Inactivation	CARD	ARDatabase
MF6427	f__Enterobacteriaceae	f__Enterobacteriaceae	0.000687314	0.000257566	274	0.00795801	0.0633123	mdtF	RND Antibiotic Efflux Pump	RND Efflux Pump	Determinant of Resistance to Multidrug Class	Antibiotic Efflux	CARD	ARDatabase
MF7418	f__Enterobacteriaceae	f__Enterobacteriaceae	0.000696005	0.00033668	127	0.0394103	0.198429	tet(A)	Tetracycline ABC Transporter	ABC Transporter	Determinant of Tetracycline Resistance	Antibiotic Efflux	CARD	ARDatabase
MF6939	f__Enterobacteriaceae	f__Enterobacteriaceae	0.000726504	0.000326392	252	0.0266317	0.148272	Escherichia coli emrE	SMR Antibiotic Efflux Pump	SMR Efflux Pump	Determinant of Resistance to Multidrug Class	Antibiotic Efflux	CARD	ARDatabase
MF6420	f__Enterobacteriaceae	f__Enterobacteriaceae	0.000795379	0.00015502	316	4.68776e-07	1.29815e-05	PmrF	Pmr phosphoethanolamine transferase	Phosphoethanolamine Transferase	Determinant of Polymyxin Resistance	Antibiotic Target Alteration	CARD	ARDatabase
MF6791	f__Enterobacteriaceae	f__Enterobacteriaceae	0.000995717	0.000501406	151	0.0477935	0.22789	AAC(6')-Ib7	AAC(6')	Aminoglycoside Acetyltransferase	Determinant of Aminoglycoside Resistance	Antibiotic Inactivation	CARD	ARDatabase
MF6415	f__Enterobacteriaceae	f__Enterobacteriaceae	0.00101358	0.000185005	311	7.98774e-08	2.67496e-06	mdtH	MFS Antibiotic Efflux Pump	MFS Efflux Pump	Determinant of Resistance to Multidrug Class	Antibiotic Efflux	CARD	ARDatabase
MF6428	f__Enterobacteriaceae	f__Enterobacteriaceae	0.00105816	0.000257621	286	4.93647e-05	0.000877594	mdtM	MFS Antibiotic Efflux Pump	MFS Efflux Pump	Determinant of Resistance to Multidrug Class	Antibiotic Efflux	CARD	ARDatabase
MF3792	f__Enterobacteriaceae	f__Enterobacteriaceae	0.00112682	0.000189891	298	6.84501e-09	2.89906e-07	CMY-LAT-MOX-ACT-MIR-FOX	CMY-LAT-MOX-ACT-MIR-FOX beta-lactamase (Class C)	Class C Beta-lactamase	Determinant of Beta-lactam Resistance	Antibiotic Inactivation	Resfam	FxnlSlxns
MF6837	f__Enterobacteriaceae	f__Enterobacteriaceae	0.0011872	0.000186167	321	5.44228e-10	4.11512e-08	EmrK	MFS Antibiotic Efflux Pump	MFS Efflux Pump	Determinant of Resistance to Multidrug Class	Antibiotic Efflux	CARD	ARDatabase
MF6840	f__Enterobacteriaceae	f__Enterobacteriaceae	0.00118744	0.000208788	317	2.63871e-08	9.99932e-07	EmrA	MFS Antibiotic Efflux Pump	MFS Efflux Pump	Determinant of Resistance to Multidrug Class	Antibiotic Efflux	CARD	ARDatabase
MF6663	f__Enterobacteriaceae	f__Enterobacteriaceae	0.00121288	0.000235058	304	4.05413e-07	1.14469e-05	TolC	RND Antibiotic Efflux Pump	RND Efflux Pump	Determinant of Resistance to Multidrug Class	Antibiotic Efflux	CARD	ARDatabase
MF6871	f__Enterobacteriaceae	f__Enterobacteriaceae	0.00122838	0.000243736	303	7.33318e-07	1.95551e-05	mdtO	MFS Antibiotic Efflux Pump	MFS Efflux Pump	Determinant of Resistance to Multidrug Class	Antibiotic Efflux	CARD	ARDatabase
MF6838	f__Enterobacteriaceae	f__Enterobacteriaceae	0.00123822	0.000206328	317	4.71513e-09	2.26277e-07	EmrY	MFS Antibiotic Efflux Pump	MFS Efflux Pump	Determinant of Resistance to Multidrug Class	Antibiotic Efflux	CARD	ARDatabase
MF6416	f__Enterobacteriaceae	f__Enterobacteriaceae	0.00125859	0.000478431	251	0.00888146	0.0691314	ugd	Pmr phosphoethanolamine transferase	Phosphoethanolamine Transferase	Determinant of Polymyxin Resistance	Antibiotic Target Alteration	CARD	ARDatabase
MF6868	f__Enterobacteriaceae	f__Enterobacteriaceae	0.00127021	0.000219565	308	1.55865e-08	6.06611e-07	mdtE	RND Antibiotic Efflux Pump	RND Efflux Pump	Determinant of Resistance to Multidrug Class	Antibiotic Efflux	CARD	ARDatabase
MF6425	f__Enterobacteriaceae	f__Enterobacteriaceae	0.00132797	0.000308737	305	2.18122e-05	0.000430269	AcrE	RND Antibiotic Efflux Pump	RND Efflux Pump	Determinant of Resistance to Multidrug Class	Antibiotic Efflux	CARD	ARDatabase
MF7378	f__Enterobacteriaceae	f__Enterobacteriaceae	0.00138262	0.000304403	281	7.56916e-06	0.00016268	YojI	ABC Transporter	ABC Transporter	Determinant of Resistance to Peptide Antibiotics	Antibiotic Efflux	CARD	ARDatabase
MF6870	f__Enterobacteriaceae	f__Enterobacteriaceae	0.00146193	0.000251552	296	1.34755e-08	5.39021e-07	mdtP	MFS Antibiotic Efflux Pump	MFS Efflux Pump	Determinant of Resistance to Multidrug Class	Antibiotic Efflux	CARD	ARDatabase
MF7374	f__Enterobacteriaceae	f__Enterobacteriaceae	0.00149691	0.000324398	288	5.46426e-06	0.000122946	acrB	RND Antibiotic Efflux Pump	RND Efflux Pump	Efflux Pump Complex or Subunit Conferring Antibiotic Resistance	Antibiotic Efflux	CARD	ARDatabase
MF6418	f__Enterobacteriaceae	f__Enterobacteriaceae	0.00154697	0.000349194	292	1.24528e-05	0.000260213	mdtB	RND Antibiotic Efflux Pump	RND Efflux Pump	Determinant of Resistance to Multidrug Class	Antibiotic Efflux	CARD	ARDatabase
MF6426	f__Enterobacteriaceae	f__Enterobacteriaceae	0.00158281	0.000293746	298	1.27484e-07	4.07947e-06	AcrF	RND Antibiotic Efflux Pump	RND Efflux Pump	Determinant of Resistance to Multidrug Class	Antibiotic Efflux	CARD	ARDatabase
MF6419	f__Enterobacteriaceae	f__Enterobacteriaceae	0.00171492	0.000375351	302	6.70817e-06	0.000148612	mdtC	RND Antibiotic Efflux Pump	RND Efflux Pump	Determinant of Resistance to Multidrug Class	Antibiotic Efflux	CARD	ARDatabase
MF6417	f__Enterobacteriaceae	f__Enterobacteriaceae	0.00172763	0.000303988	287	2.72052e-08	1.0045e-06	mdtA	RND Antibiotic Efflux Pump	RND Efflux Pump	Determinant of Resistance to Multidrug Class	Antibiotic Efflux	CARD	ARDatabase
MF7455	f__Enterobacteriaceae	f__Enterobacteriaceae	0.00172983	0.000292504	299	7.66273e-09	3.15267e-07	ampH	ampC-type beta-lactamase (Class C)	Class C Beta-lactamase	Determinant of Beta-lactam Resistance	Antibiotic Inactivation	CARD	ARDatabase
MF7377	f__Enterobacteriaceae	f__Enterobacteriaceae	0.00173693	0.000331454	308	2.71433e-07	7.97681e-06	msbA	ABC Transporter	ABC Transporter	Determinant of Resistance to Multidrug Class	Antibiotic Efflux	CARD	ARDatabase
MF7375	f__Enterobacteriaceae	f__Enterobacteriaceae	0.00183184	0.000333348	301	7.31047e-08	2.50645e-06	Escherichia coli acrA	RND Antibiotic Efflux Pump	RND Efflux Pump	Determinant of Resistance to Multidrug Class	Antibiotic Efflux	CARD	ARDatabase
MF7445	f__Enterobacteriaceae	f__Enterobacteriaceae	0.00192968	0.00040243	299	2.37042e-06	5.98842e-05	acrD	RND Antibiotic Efflux Pump	RND Efflux Pump	Efflux Pump Complex or Subunit Conferring Antibiotic Resistance	Antibiotic Efflux	CARD	ARDatabase
MF6616	f__Enterobacteriaceae	f__Enterobacteriaceae	0.0019916	0.000305597	298	2.3707e-10	2.00812e-08	mdtG	MFS Antibiotic Efflux Pump	MFS Efflux Pump	Determinant of Resistance to Multidrug Class	Antibiotic Efflux	CARD	ARDatabase
MF6422	f__Enterobacteriaceae	f__Enterobacteriaceae	0.0022145	0.000352899	298	9.8727e-10	5.92362e-08	EmrB	MFS Antibiotic Efflux Pump	MFS Efflux Pump	Determinant of Resistance to Multidrug Class	Antibiotic Efflux	CARD	ARDatabase
MF6873	f__Enterobacteriaceae	f__Enterobacteriaceae	0.00239772	0.000360284	305	1.03327e-10	9.91935e-09	eptA	Pmr phosphoethanolamine transferase	Phosphoethanolamine Transferase	Determinant of Polymyxin Resistance	Antibiotic Target Alteration	CARD	ARDatabase
MF6872	f__Enterobacteriaceae	f__Enterobacteriaceae	0.00243479	0.000312834	303	7.34987e-14	1.32298e-11	mdtN	MFS Antibiotic Efflux Pump	MFS Efflux Pump	Determinant of Resistance to Multidrug Class	Antibiotic Efflux	CARD	ARDatabase
MF3557	f__Enterobacteriaceae	f__Enterobacteriaceae	0.00259258	0.00041992	299	1.77735e-09	9.47919e-08	ClassC-AmpC	ampC-type beta-lactamase (Class C)	Class C Beta-lactamase	Determinant of Beta-lactam Resistance	Antibiotic Inactivation	Resfam	FxnlSlxns
MF4599	f__Eubacteriaceae	f__Eubacteriaceae	-0.00292231	0.000943973	188	0.00212906	0.0230514	bla_class_A	Unclassified beta-lactamase (Class A)	Class A Beta-lactamase	Determinant of Beta-lactam Resistance	Antibiotic Inactivation	Resfam	FxnlSlxns
MF6425	f__Eubacteriaceae	f__Eubacteriaceae	-0.00143521	0.000412303	305	0.000565471	0.00708068	AcrE	RND Antibiotic Efflux Pump	RND Efflux Pump	Determinant of Resistance to Multidrug Class	Antibiotic Efflux	CARD	ARDatabase
MF7206	f__Eubacteriaceae	f__Eubacteriaceae	-0.0014286	0.000420591	53	0.000756841	0.00915841	trim_DfrA1_like	Trimethoprim Resistant Dihydrofolate Reductase (dfr)	Dihydrofolate reductase	Determinant of Diaminopyrimidine Resistance	Antibiotic Target Replacement	NCBI-AMR	FxnlSlxns
MF7375	f__Eubacteriaceae	f__Eubacteriaceae	-0.00140563	0.000448128	301	0.00185605	0.0208806	Escherichia coli acrA	RND Antibiotic Efflux Pump	RND Efflux Pump	Determinant of Resistance to Multidrug Class	Antibiotic Efflux	CARD	ARDatabase
MF6418	f__Eubacteriaceae	f__Eubacteriaceae	-0.00138818	0.000471597	292	0.00346159	0.0334543	mdtB	RND Antibiotic Efflux Pump	RND Efflux Pump	Determinant of Resistance to Multidrug Class	Antibiotic Efflux	CARD	ARDatabase
MF7377	f__Eubacteriaceae	f__Eubacteriaceae	-0.00136405	0.000448867	308	0.00255213	0.0262505	msbA	ABC Transporter	ABC Transporter	Determinant of Resistance to Multidrug Class	Antibiotic Efflux	CARD	ARDatabase
MF7374	f__Eubacteriaceae	f__Eubacteriaceae	-0.00135901	0.000432387	288	0.0018218	0.0206566	acrB	RND Antibiotic Efflux Pump	RND Efflux Pump	Efflux Pump Complex or Subunit Conferring Antibiotic Resistance	Antibiotic Efflux	CARD	ARDatabase
MF7445	f__Eubacteriaceae	f__Eubacteriaceae	-0.0013375	0.00053713	299	0.0132543	0.0908676	acrD	RND Antibiotic Efflux Pump	RND Efflux Pump	Efflux Pump Complex or Subunit Conferring Antibiotic Resistance	Antibiotic Efflux	CARD	ARDatabase
MF6416	f__Eubacteriaceae	f__Eubacteriaceae	-0.00132532	0.000639638	251	0.0390249	0.197266	ugd	Pmr phosphoethanolamine transferase	Phosphoethanolamine Transferase	Determinant of Polymyxin Resistance	Antibiotic Target Alteration	CARD	ARDatabase
MF0089	f__Eubacteriaceae	f__Eubacteriaceae	-0.00131011	0.000464573	119	0.00507249	0.0459104	tet(M)	Tetracycline Resistance Ribosomal Protection Protein	Tetracycline ribosomal protection protein	Determinant of Tetracycline Resistance	Antibiotic Target Protection	NCBI-AMR	ARDatabase
MF6616	f__Eubacteriaceae	f__Eubacteriaceae	-0.0012597	0.000410049	298	0.00229594	0.0243099	mdtG	MFS Antibiotic Efflux Pump	MFS Efflux Pump	Determinant of Resistance to Multidrug Class	Antibiotic Efflux	CARD	ARDatabase
MF6840	f__Eubacteriaceae	f__Eubacteriaceae	-0.000987821	0.00028087	317	0.000494826	0.00636205	EmrA	MFS Antibiotic Efflux Pump	MFS Efflux Pump	Determinant of Resistance to Multidrug Class	Antibiotic Efflux	CARD	ARDatabase
MF6426	f__Eubacteriaceae	f__Eubacteriaceae	-0.000986585	0.000393085	298	0.0125427	0.0876768	AcrF	RND Antibiotic Efflux Pump	RND Efflux Pump	Determinant of Resistance to Multidrug Class	Antibiotic Efflux	CARD	ARDatabase
MF7378	f__Eubacteriaceae	f__Eubacteriaceae	-0.000912168	0.000410492	281	0.0269182	0.148514	YojI	ABC Transporter	ABC Transporter	Determinant of Resistance to Peptide Antibiotics	Antibiotic Efflux	CARD	ARDatabase
MF6417	f__Eubacteriaceae	f__Eubacteriaceae	-0.000885994	0.000414595	287	0.0332751	0.171129	mdtA	RND Antibiotic Efflux Pump	RND Efflux Pump	Determinant of Resistance to Multidrug Class	Antibiotic Efflux	CARD	ARDatabase
MF6868	f__Eubacteriaceae	f__Eubacteriaceae	-0.000885306	0.000292696	308	0.002682	0.027337	mdtE	RND Antibiotic Efflux Pump	RND Efflux Pump	Determinant of Resistance to Multidrug Class	Antibiotic Efflux	CARD	ARDatabase
MF6870	f__Eubacteriaceae	f__Eubacteriaceae	-0.000846655	0.000340629	296	0.0133989	0.0908676	mdtP	MFS Antibiotic Efflux Pump	MFS Efflux Pump	Determinant of Resistance to Multidrug Class	Antibiotic Efflux	CARD	ARDatabase
MF6415	f__Eubacteriaceae	f__Eubacteriaceae	-0.000822093	0.000250401	311	0.00112988	0.0131212	mdtH	MFS Antibiotic Efflux Pump	MFS Efflux Pump	Determinant of Resistance to Multidrug Class	Antibiotic Efflux	CARD	ARDatabase
MF7408	f__Eubacteriaceae	f__Eubacteriaceae	-0.000788776	0.000308673	242	0.011028	0.0810219	mphB	MphB macrolide phosphotransferase	Macrolide Phosphotransferase	Determinant of MLS Resistance	Antibiotic Inactivation	CARD	ARDatabase
MF7455	f__Eubacteriaceae	f__Eubacteriaceae	-0.000758822	0.000391279	299	0.0532915	0.245972	ampH	ampC-type beta-lactamase (Class C)	Class C Beta-lactamase	Determinant of Beta-lactam Resistance	Antibiotic Inactivation	CARD	ARDatabase
MF6428	f__Eubacteriaceae	f__Eubacteriaceae	-0.000694638	0.000345858	286	0.0453831	0.220619	mdtM	MFS Antibiotic Efflux Pump	MFS Efflux Pump	Determinant of Resistance to Multidrug Class	Antibiotic Efflux	CARD	ARDatabase
MF6799	f__Eubacteriaceae	f__Eubacteriaceae	-0.000693708	0.000325193	73	0.0336142	0.172258	tet(W/N/W)	Tetracycline Resistance Ribosomal Protection Protein	Tetracycline ribosomal protection protein	Determinant of Tetracycline Resistance	Antibiotic Target Protection	CARD	ARDatabase
MF6837	f__Eubacteriaceae	f__Eubacteriaceae	-0.000637497	0.000251573	321	0.0117114	0.0830761	EmrK	MFS Antibiotic Efflux Pump	MFS Efflux Pump	Determinant of Resistance to Multidrug Class	Antibiotic Efflux	CARD	ARDatabase
MF6838	f__Eubacteriaceae	f__Eubacteriaceae	-0.000636811	0.000279338	317	0.0232233	0.134304	EmrY	MFS Antibiotic Efflux Pump	MFS Efflux Pump	Determinant of Resistance to Multidrug Class	Antibiotic Efflux	CARD	ARDatabase
MF3792	f__Eubacteriaceae	f__Eubacteriaceae	-0.000562137	0.000254508	298	0.0278575	0.151733	CMY-LAT-MOX-ACT-MIR-FOX	CMY-LAT-MOX-ACT-MIR-FOX beta-lactamase (Class C)	Class C Beta-lactamase	Determinant of Beta-lactam Resistance	Antibiotic Inactivation	Resfam	FxnlSlxns
MF7515	f__Eubacteriaceae	f__Eubacteriaceae	-0.000495345	0.00021201	100	0.0200071	0.119544	ant(3'')-Ia	ANT(3'')	Aminoglycoside Nucleotidyltransferase	Determinant of Aminoglycoside Resistance	Antibiotic Inactivation	NCBI-AMR	ARDatabase
MF6420	f__Eubacteriaceae	f__Eubacteriaceae	-0.000456131	0.000209383	316	0.0300409	0.15904	PmrF	Pmr phosphoethanolamine transferase	Phosphoethanolamine Transferase	Determinant of Polymyxin Resistance	Antibiotic Target Alteration	CARD	ARDatabase
MF7516	f__Eubacteriaceae	f__Eubacteriaceae	-0.000426865	0.000190211	91	0.0254667	0.14325	aadA21	ANT(3'')	Aminoglycoside Nucleotidyltransferase	Determinant of Aminoglycoside Resistance	Antibiotic Inactivation	NCBI-AMR	ARDatabase
MF4336	f__Eubacteriaceae	f__Eubacteriaceae	-0.000384374	9.56708e-05	47	7.13252e-05	0.0011412	bla_class_A	Unclassified beta-lactamase (Class A)	Class A Beta-lactamase	Determinant of Beta-lactam Resistance	Antibiotic Inactivation	Resfam	FxnlSlxns
MF8171	f__Eubacteriaceae	f__Eubacteriaceae	0.000287304	0.000111595	106	0.0104501	0.0775675	aac(6_)-set_A	AAC(6')	Aminoglycoside Acetyltransferase	Determinant of Aminoglycoside Resistance	Antibiotic Inactivation	NCBI-AMR	ARDatabase
MF0691	f__Eubacteriaceae	f__Eubacteriaceae	0.000550993	0.000198212	81	0.00574882	0.0495706	aadS	ANT(6)	Aminoglycoside Nucleotidyltransferase	Determinant of Aminoglycoside Resistance	Antibiotic Inactivation	NCBI-AMR	FxnlSlxns
MF7922	f__Eubacteriaceae	f__Eubacteriaceae	0.000649327	0.000287695	257	0.0246025	0.139479	dfrF	Trimethoprim Resistant Dihydrofolate Reductase (dfr)	Dihydrofolate reductase	Determinant of Diaminopyrimidine Resistance	Antibiotic Target Replacement	NCBI-AMR	ARDatabase
MF7458	f__Eubacteriaceae	f__Eubacteriaceae	0.000662109	0.000246982	194	0.00768628	0.0616855	tetQ	Tetracycline Resistance Ribosomal Protection Protein	Tetracycline ribosomal protection protein	Determinant of Tetracycline Resistance	Antibiotic Target Protection	CARD	ARDatabase
MF4767	f__Eubacteriaceae	f__Eubacteriaceae	0.000694137	0.000280601	53	0.013829	0.0926218	CblA	CblA beta-lactamase (Class A)	Class A Beta-lactamase	Determinant of Beta-lactam Resistance	Antibiotic Inactivation	Resfam	FxnlSlxns
MF8271	f__Eubacteriaceae	f__Eubacteriaceae	0.000766528	0.000303155	216	0.0118957	0.0839695	tet(40)	Tetracycline MFS Antibiotic Efflux Pump	MFS Efflux Pump	Determinant of Tetracycline Resistance	Antibiotic Efflux	CARD	FxnlSlxns
MF4600	f__Eubacteriaceae	f__Eubacteriaceae	0.000863604	0.000388318	379	0.0267713	0.148272	TetM-TetW-TetO-TetS	Tetracycline Resistance Ribosomal Protection Protein	Tetracycline ribosomal protection protein	Determinant of Tetracycline Resistance	Antibiotic Target Protection	Resfam	FxnlSlxns
MF7194	f__Eubacteriaceae	f__Eubacteriaceae	0.000941303	0.000293054	110	0.00143918	0.0164478	tet_protect	Tetracycline Resistance MFS Efflux Pump	MFS Efflux Pump	Determinant of Tetracycline Resistance	Antibiotic Efflux	NCBI-AMR	FxnlSlxns
MF4736	f__Eubacteriaceae	f__Eubacteriaceae	0.00153605	0.000578671	341	0.00830477	0.065349	TetM-TetW-TetO-TetS	Tetracycline Resistance Ribosomal Protection Protein	Tetracycline ribosomal protection protein	Determinant of Tetracycline Resistance	Antibiotic Target Protection	Resfam	FxnlSlxns
MF0093	f__Eubacteriaceae	f__Eubacteriaceae	0.00161864	0.000651531	344	0.0134408	0.0908676	tet(W)	Tetracycline Resistance Ribosomal Protection Protein	Tetracycline ribosomal protection protein	Determinant of Tetracycline Resistance	Antibiotic Target Protection	NCBI-AMR	ARDatabase
MF0092	f__Eubacteriaceae	f__Eubacteriaceae	0.00170764	0.000417895	368	5.39126e-05	0.000924215	tet(W)	Tetracycline Resistance Ribosomal Protection Protein	Tetracycline ribosomal protection protein	Determinant of Tetracycline Resistance	Antibiotic Target Protection	NCBI-AMR	ARDatabase
MF7652	f__Eubacteriaceae	f__Eubacteriaceae	0.00221496	0.000466849	380	3.00037e-06	7.32294e-05	tet(M)	Tetracycline Resistance Ribosomal Protection Protein	Tetracycline ribosomal protection protein	Determinant of Tetracycline Resistance	Antibiotic Target Protection	NCBI-AMR	ARDatabase
MF7478	f__Eubacteriaceae	f__Eubacteriaceae	0.00229863	0.000564335	341	5.69969e-05	0.000965594	tetO	Tetracycline Resistance Ribosomal Protection Protein	Tetracycline ribosomal protection protein	Determinant of Tetracycline Resistance	Antibiotic Target Protection	CARD	FxnlSlxns
MF3849	f__Eubacteriaceae	f__Eubacteriaceae	0.0025154	0.000627807	351	7.47545e-05	0.00118293	TetM-TetW-TetO-TetS	Tetracycline Resistance Ribosomal Protection Protein	Tetracycline ribosomal protection protein	Determinant of Tetracycline Resistance	Antibiotic Target Protection	Resfam	FxnlSlxns
MF4599	f__Prevotellaceae	f__Prevotellaceae	-0.00229787	0.000958605	188	0.0170754	0.107373	bla_class_A	Unclassified beta-lactamase (Class A)	Class A Beta-lactamase	Determinant of Beta-lactam Resistance	Antibiotic Inactivation	Resfam	FxnlSlxns
MF7206	f__Prevotellaceae	f__Prevotellaceae	-0.00152777	0.000427095	53	0.000393952	0.00530178	trim_DfrA1_like	Trimethoprim Resistant Dihydrofolate Reductase (dfr)	Dihydrofolate reductase	Determinant of Diaminopyrimidine Resistance	Antibiotic Target Replacement	NCBI-AMR	FxnlSlxns
MF4777	f__Prevotellaceae	f__Prevotellaceae	-0.00145134	0.00056019	261	0.00995932	0.0746218	CblA	CblA beta-lactamase (Class A)	Class A Beta-lactamase	Determinant of Beta-lactam Resistance	Antibiotic Inactivation	Resfam	FxnlSlxns
MF0443	f__Prevotellaceae	f__Prevotellaceae	-0.00129466	0.000436692	245	0.00322842	0.0314116	Erm	Erm 23S Ribosomal RNA Methyltransferase	23S rRNA Methyltransferase	Determinant of MLS Resistance	Antibiotic Target Alteration	NCBI-AMR	ARDatabase
MF6416	f__Prevotellaceae	f__Prevotellaceae	-0.00126972	0.00064959	251	0.0514511	0.241334	ugd	Pmr phosphoethanolamine transferase	Phosphoethanolamine Transferase	Determinant of Polymyxin Resistance	Antibiotic Target Alteration	CARD	ARDatabase
MF3617	f__Prevotellaceae	f__Prevotellaceae	-0.00117452	0.000497163	98	0.0187152	0.113713	CMY-LAT-MOX-ACT-MIR-FOX	CMY-LAT-MOX-ACT-MIR-FOX beta-lactamase (Class C)	Class C Beta-lactamase	Determinant of Beta-lactam Resistance	Antibiotic Inactivation	Resfam	FxnlSlxns
MF3814	f__Prevotellaceae	f__Prevotellaceae	-0.00107051	0.00029955	68	0.000399993	0.00531465	TetM-TetW-TetO-TetS	Tetracycline Resistance Ribosomal Protection Protein	Tetracycline ribosomal protection protein	Determinant of Tetracycline Resistance	Antibiotic Target Protection	Resfam	FxnlSlxns
MF0380	f__Prevotellaceae	f__Prevotellaceae	-0.0010536	0.000456569	234	0.0216215	0.126813	lnu(AN2)	LnuAN2_Lincosamide Nucleotidyltransferase	Lincosamide Nucleotidyltransferase	Determinant of MLS Resistance	Antibiotic Inactivation	NCBI-AMR	ARDatabase
MF6939	f__Prevotellaceae	f__Prevotellaceae	-0.00100795	0.000442805	252	0.0234557	0.135105	Escherichia coli emrE	SMR Antibiotic Efflux Pump	SMR Efflux Pump	Determinant of Resistance to Multidrug Class	Antibiotic Efflux	CARD	ARDatabase
MF7214	f__Prevotellaceae	f__Prevotellaceae	-0.000980893	0.000448961	89	0.0295572	0.157057	CMY-LAT-MOX-ACT-MIR-FOX	CMY-LAT-MOX-ACT-MIR-FOX beta-lactamase (Class C)	Class C Beta-lactamase	Determinant of Beta-lactam Resistance	Antibiotic Inactivation	Resfam	FxnlSlxns
MF6425	f__Prevotellaceae	f__Prevotellaceae	-0.000867505	0.000418709	305	0.0390422	0.197266	AcrE	RND Antibiotic Efflux Pump	RND Efflux Pump	Determinant of Resistance to Multidrug Class	Antibiotic Efflux	CARD	ARDatabase
MF6616	f__Prevotellaceae	f__Prevotellaceae	-0.000833332	0.000416461	298	0.0461849	0.221688	mdtG	MFS Antibiotic Efflux Pump	MFS Efflux Pump	Determinant of Resistance to Multidrug Class	Antibiotic Efflux	CARD	ARDatabase
MF0456	f__Prevotellaceae	f__Prevotellaceae	-0.00078243	0.000313101	108	0.0129005	0.0893115	tet(W)	Tetracycline Resistance Ribosomal Protection Protein	Tetracycline ribosomal protection protein	Determinant of Tetracycline Resistance	Antibiotic Target Protection	NCBI-AMR	ARDatabase
MF0360	f__Prevotellaceae	f__Prevotellaceae	-0.000721206	0.000234668	171	0.00227846	0.0243036	aad9	ANT(9)	Aminoglycoside Nucleotidyltransferase	Determinant of Aminoglycoside Resistance	Antibiotic Inactivation	NCBI-AMR	ARDatabase
MF6799	f__Prevotellaceae	f__Prevotellaceae	-0.000681808	0.000330295	73	0.0397472	0.19924	tet(W/N/W)	Tetracycline Resistance Ribosomal Protection Protein	Tetracycline ribosomal protection protein	Determinant of Tetracycline Resistance	Antibiotic Target Protection	CARD	ARDatabase
MF0435	f__Prevotellaceae	f__Prevotellaceae	-0.000662514	0.000313075	253	0.0350095	0.17814	Erm	Erm 23S Ribosomal RNA Methyltransferase	23S rRNA Methyltransferase	Determinant of MLS Resistance	Antibiotic Target Alteration	NCBI-AMR	ARDatabase
MF8345	f__Prevotellaceae	f__Prevotellaceae	-0.000661093	0.000341437	83	0.0536355	0.245972	TetM-TetW-TetO-TetS	Tetracycline Resistance Ribosomal Protection Protein	Tetracycline ribosomal protection protein	Determinant of Tetracycline Resistance	Antibiotic Target Protection	NCBI-AMR	FxnlSlxns
MF6415	f__Prevotellaceae	f__Prevotellaceae	-0.000625428	0.000254382	311	0.0144313	0.0953263	mdtH	MFS Antibiotic Efflux Pump	MFS Efflux Pump	Determinant of Resistance to Multidrug Class	Antibiotic Efflux	CARD	ARDatabase
MF8323	f__Prevotellaceae	f__Prevotellaceae	-0.000595729	0.000272523	253	0.0294681	0.157057	bla_class_C	Unclassified beta-lactamase (Class C)	Class C Beta-lactamase	Determinant of Beta-lactam Resistance	Antibiotic Inactivation	NCBI-AMR	FxnlSlxns
MF0074	f__Prevotellaceae	f__Prevotellaceae	-0.000535167	0.000275663	319	0.053076	0.245972	mef(En2)	Macrolide MFS Antibiotic Efflux Pump	MFS Efflux Pump	Determinant of MLS Resistance	Antibiotic Efflux	NCBI-AMR	ARDatabase
MF7516	f__Prevotellaceae	f__Prevotellaceae	-0.000445635	0.000193174	91	0.0216638	0.126813	aadA21	ANT(3'')	Aminoglycoside Nucleotidyltransferase	Determinant of Aminoglycoside Resistance	Antibiotic Inactivation	NCBI-AMR	ARDatabase
MF4336	f__Prevotellaceae	f__Prevotellaceae	-0.000391857	9.71502e-05	47	6.68728e-05	0.00108199	bla_class_A	Unclassified beta-lactamase (Class A)	Class A Beta-lactamase	Determinant of Beta-lactam Resistance	Antibiotic Inactivation	Resfam	FxnlSlxns
MF7646	f__Prevotellaceae	f__Prevotellaceae	-0.000347472	0.000132689	83	0.0092108	0.0709281	tet(44)	Tetracycline Resistance Ribosomal Protection Protein	Tetracycline ribosomal protection protein	Determinant of Tetracycline Resistance	Antibiotic Target Protection	NCBI-AMR	ARDatabase
MF8119	f__Prevotellaceae	f__Prevotellaceae	0.00607879	0.000282245	148	4.32624e-67	6.22979e-64	tet(32)	Tetracycline Resistance Ribosomal Protection Protein	Tetracycline ribosomal protection protein	Determinant of Tetracycline Resistance	Antibiotic Target Protection	Resfinder	FxnlSlxns
MF7572	f__Prevotellaceae	f__Prevotellaceae	0.0063749	0.000558802	302	8.44657e-26	4.05435e-23	cfxA	CfxA beta-lactamase (Class A)	Class A Beta-lactamase	Determinant of Beta-lactam Resistance	Antibiotic Inactivation	NCBI-AMR	ARDatabase
MF6670	f__Prevotellaceae	f__Prevotellaceae	0.00829148	0.000400014	114	1.04629e-63	7.5333e-61	cfxA	CfxA beta-lactamase (Class A)	Class A Beta-lactamase	Determinant of Beta-lactam Resistance	Antibiotic Inactivation	CARD	ARDatabase
MF4599	f__Ruminococcaceae	f__Ruminococcaceae	-0.00220876	0.000998868	188	0.0276807	0.15156	bla_class_A	Unclassified beta-lactamase (Class A)	Class A Beta-lactamase	Determinant of Beta-lactam Resistance	Antibiotic Inactivation	Resfam	FxnlSlxns
MF7206	f__Ruminococcaceae	f__Ruminococcaceae	-0.00164768	0.000445216	53	0.000247797	0.00349831	trim_DfrA1_like	Trimethoprim Resistant Dihydrofolate Reductase (dfr)	Dihydrofolate reductase	Determinant of Diaminopyrimidine Resistance	Antibiotic Target Replacement	NCBI-AMR	FxnlSlxns
MF6416	f__Ruminococcaceae	f__Ruminococcaceae	-0.00160346	0.000676495	251	0.0183255	0.11243	ugd	Pmr phosphoethanolamine transferase	Phosphoethanolamine Transferase	Determinant of Polymyxin Resistance	Antibiotic Target Alteration	CARD	ARDatabase
MF0089	f__Ruminococcaceae	f__Ruminococcaceae	-0.00116509	0.000490135	119	0.0179728	0.111077	tet(M)	Tetracycline Resistance Ribosomal Protection Protein	Tetracycline ribosomal protection protein	Determinant of Tetracycline Resistance	Antibiotic Target Protection	NCBI-AMR	ARDatabase
MF6670	f__Ruminococcaceae	f__Ruminococcaceae	-0.00101387	0.000412424	114	0.0144209	0.0953263	cfxA	CfxA beta-lactamase (Class A)	Class A Beta-lactamase	Determinant of Beta-lactam Resistance	Antibiotic Inactivation	CARD	ARDatabase
MF3814	f__Ruminococcaceae	f__Ruminococcaceae	-0.000819253	0.000310395	68	0.00866203	0.0677898	TetM-TetW-TetO-TetS	Tetracycline Resistance Ribosomal Protection Protein	Tetracycline ribosomal protection protein	Determinant of Tetracycline Resistance	Antibiotic Target Protection	Resfam	FxnlSlxns
MF8117	f__Ruminococcaceae	f__Ruminococcaceae	-0.000805528	0.000324269	87	0.013432	0.0908676	aadA24	ANT(3'')	Aminoglycoside Nucleotidyltransferase	Determinant of Aminoglycoside Resistance	Antibiotic Inactivation	Resfinder	FxnlSlxns
MF6427	f__Ruminococcaceae	f__Ruminococcaceae	-0.000741217	0.00036772	274	0.0445798	0.219095	mdtF	RND Antibiotic Efflux Pump	RND Efflux Pump	Determinant of Resistance to Multidrug Class	Antibiotic Efflux	CARD	ARDatabase
MF7516	f__Ruminococcaceae	f__Ruminococcaceae	-0.00063026	0.000201142	91	0.00187558	0.0209367	aadA21	ANT(3'')	Aminoglycoside Nucleotidyltransferase	Determinant of Aminoglycoside Resistance	Antibiotic Inactivation	NCBI-AMR	ARDatabase
MF4336	f__Ruminococcaceae	f__Ruminococcaceae	-0.000293493	0.000101272	47	0.00398016	0.037217	bla_class_A	Unclassified beta-lactamase (Class A)	Class A Beta-lactamase	Determinant of Beta-lactam Resistance	Antibiotic Inactivation	Resfam	FxnlSlxns
MF8319	f__Ruminococcaceae	f__Ruminococcaceae	0.000229109	9.60063e-05	41	0.0175203	0.109217	TetM-TetW-TetO-TetS	Tetracycline Resistance Ribosomal Protection Protein	Tetracycline ribosomal protection protein	Determinant of Tetracycline Resistance	Antibiotic Target Protection	NCBI-AMR	FxnlSlxns
MF3362	f__Ruminococcaceae	f__Ruminococcaceae	0.000436429	0.000178356	80	0.0148758	0.0969282	TetM-TetW-TetO-TetS	Tetracycline Resistance Ribosomal Protection Protein	Tetracycline ribosomal protection protein	Determinant of Tetracycline Resistance	Antibiotic Target Protection	Resfam	FxnlSlxns
MF3847	f__Ruminococcaceae	f__Ruminococcaceae	0.000671622	0.000186999	110	0.000376255	0.00511139	Campylobacter coli chloramphenicol acetyltransferase	Campylobacter coli chloramphenicol acetyltransferase	Chloramphenicol Acetyltransferase	Determinant of Phenicol Resistance	Antibiotic Inactivation	CARD	FxnlSlxns
MF7525	f__Ruminococcaceae	f__Ruminococcaceae	0.00074823	0.000285151	234	0.00906639	0.0701914	aph(3_)-IIIa	APH(3')	Aminoglycoside Phosphotransferase	Determinant of Aminoglycoside Resistance	Antibiotic Inactivation	NCBI-AMR	ARDatabase
MF8271	f__Ruminococcaceae	f__Ruminococcaceae	0.000822157	0.000315172	216	0.00949725	0.0716023	tet(40)	Tetracycline MFS Antibiotic Efflux Pump	MFS Efflux Pump	Determinant of Tetracycline Resistance	Antibiotic Efflux	CARD	FxnlSlxns
MF0435	f__Ruminococcaceae	f__Ruminococcaceae	0.000898268	0.000320367	253	0.00532825	0.0473622	Erm	Erm 23S Ribosomal RNA Methyltransferase	23S rRNA Methyltransferase	Determinant of MLS Resistance	Antibiotic Target Alteration	NCBI-AMR	ARDatabase
MF0443	f__Ruminococcaceae	f__Ruminococcaceae	0.000972046	0.000450666	245	0.031662	0.164005	Erm	Erm 23S Ribosomal RNA Methyltransferase	23S rRNA Methyltransferase	Determinant of MLS Resistance	Antibiotic Target Alteration	NCBI-AMR	ARDatabase
MF8373	f__Ruminococcaceae	f__Ruminococcaceae	0.00113701	0.00052323	125	0.0304296	0.159922	catA	CatA chloramphenicol acetyltransferase	Chloramphenicol Acetyltransferase	Determinant of Phenicol Resistance	Antibiotic Inactivation	NDARO	FxnlSlxns
MF0350	f__Ruminococcaceae	f__Ruminococcaceae	0.00121839	0.00031397	375	0.00012377	0.0018761	aadE	ANT(6)	Aminoglycoside Nucleotidyltransferase	Determinant of Aminoglycoside Resistance	Antibiotic Inactivation	NCBI-AMR	ARDatabase
MF4777	f__Ruminococcaceae	f__Ruminococcaceae	0.00124616	0.000578621	261	0.0319171	0.164734	CblA	CblA beta-lactamase (Class A)	Class A Beta-lactamase	Determinant of Beta-lactam Resistance	Antibiotic Inactivation	Resfam	FxnlSlxns
MF3763	f__Ruminococcaceae	f__Ruminococcaceae	0.00130852	0.000544505	236	0.0167722	0.106527	CblA	CblA beta-lactamase (Class A)	Class A Beta-lactamase	Determinant of Beta-lactam Resistance	Antibiotic Inactivation	CARD	FxnlSlxns
MF4600	f__Ruminococcaceae	f__Ruminococcaceae	0.00214208	0.000405154	379	2.18925e-07	6.7075e-06	TetM-TetW-TetO-TetS	Tetracycline Resistance Ribosomal Protection Protein	Tetracycline ribosomal protection protein	Determinant of Tetracycline Resistance	Antibiotic Target Protection	Resfam	FxnlSlxns
MF0093	f__Ruminococcaceae	f__Ruminococcaceae	0.00289866	0.000678423	344	2.50778e-05	0.000481493	tet(W)	Tetracycline Resistance Ribosomal Protection Protein	Tetracycline ribosomal protection protein	Determinant of Tetracycline Resistance	Antibiotic Target Protection	NCBI-AMR	ARDatabase
MF6416	f__Porphyromonadaceae	f__Porphyromonadaceae	-0.00231369	0.00112169	251	0.0398479	0.19924	ugd	Pmr phosphoethanolamine transferase	Phosphoethanolamine Transferase	Determinant of Polymyxin Resistance	Antibiotic Target Alteration	CARD	ARDatabase
MF7206	f__Porphyromonadaceae	f__Porphyromonadaceae	-0.00181272	0.000741901	53	0.0150221	0.0974408	trim_DfrA1_like	Trimethoprim Resistant Dihydrofolate Reductase (dfr)	Dihydrofolate reductase	Determinant of Diaminopyrimidine Resistance	Antibiotic Target Replacement	NCBI-AMR	FxnlSlxns
MF6418	f__Porphyromonadaceae	f__Porphyromonadaceae	-0.00164048	0.000818671	292	0.0458232	0.220687	mdtB	RND Antibiotic Efflux Pump	RND Efflux Pump	Determinant of Resistance to Multidrug Class	Antibiotic Efflux	CARD	ARDatabase
MF8284	f__Porphyromonadaceae	f__Porphyromonadaceae	-0.00125839	0.000524201	57	0.016922	0.106876	bla_class_A	Unclassified beta-lactamase (Class A)	Class A Beta-lactamase	Determinant of Beta-lactam Resistance	Antibiotic Inactivation	NCBI-AMR	FxnlSlxns
MF6651	f__Porphyromonadaceae	f__Porphyromonadaceae	0.00102396	0.000392473	55	0.0094524	0.0716023	dfrA14	Trimethoprim Resistant Dihydrofolate Reductase (dfr)	Dihydrofolate reductase	Determinant of Diaminopyrimidine Resistance	Antibiotic Target Replacement	CARD	ARDatabase
MF7182	f__Porphyromonadaceae	f__Porphyromonadaceae	0.00111539	0.000381611	76	0.00368345	0.0351269	MphA	MphA macrolide phosphotransferase	Macrolide Phosphotransferase	Determinant of MLS Resistance	Antibiotic Inactivation	NCBI-AMR	FxnlSlxns
MF0435	f__Porphyromonadaceae	f__Porphyromonadaceae	0.00114707	0.000505688	253	0.0239846	0.137055	Erm	Erm 23S Ribosomal RNA Methyltransferase	23S rRNA Methyltransferase	Determinant of MLS Resistance	Antibiotic Target Alteration	NCBI-AMR	ARDatabase
MF0691	f__Porphyromonadaceae	f__Porphyromonadaceae	0.00173112	0.000317025	81	1.05485e-07	3.45223e-06	aadS	ANT(6)	Aminoglycoside Nucleotidyltransferase	Determinant of Aminoglycoside Resistance	Antibiotic Inactivation	NCBI-AMR	FxnlSlxns
MF7201	f__Porphyromonadaceae	f__Porphyromonadaceae	0.00179623	0.000915922	155	0.0506208	0.238215	trim_DfrA1_like	Trimethoprim Resistant Dihydrofolate Reductase (dfr)	Dihydrofolate reductase	Determinant of Diaminopyrimidine Resistance	Antibiotic Target Replacement	NCBI-AMR	FxnlSlxns
MF7525	f__Porphyromonadaceae	f__Porphyromonadaceae	0.00183483	0.000450408	234	5.84488e-05	0.000976388	aph(3_)-IIIa	APH(3')	Aminoglycoside Phosphotransferase	Determinant of Aminoglycoside Resistance	Antibiotic Inactivation	NCBI-AMR	ARDatabase
MF7418	f__Porphyromonadaceae	f__Porphyromonadaceae	0.00185392	0.000789337	127	0.0193684	0.11621	tet(A)	Tetracycline ABC Transporter	ABC Transporter	Determinant of Tetracycline Resistance	Antibiotic Efflux	CARD	ARDatabase
MF7642	f__Porphyromonadaceae	f__Porphyromonadaceae	0.00210816	0.000239212	57	5.04292e-17	1.45236e-14	sat4	SAT-4_Streptothricin Acetyltransferase	Streptothricin Acetyltransferase	Determinant of Resistance to Nucleoside Antibiotics	Antibiotic Inactivation	NCBI-AMR	ARDatabase
MF7655	f__Porphyromonadaceae	f__Porphyromonadaceae	0.0022545	0.00102036	122	0.0279231	0.151733	tet(X)	TetX	Tetracycline Inactivation Enzyme	Determinant of Tetracycline Resistance	Antibiotic Inactivation	NCBI-AMR	ARDatabase
MF0350	f__Porphyromonadaceae	f__Porphyromonadaceae	0.00237194	0.000499979	375	3.11487e-06	7.47568e-05	aadE	ANT(6)	Aminoglycoside Nucleotidyltransferase	Determinant of Aminoglycoside Resistance	Antibiotic Inactivation	NCBI-AMR	ARDatabase
MF7213	f__Porphyromonadaceae	f__Porphyromonadaceae	0.0024418	0.000738446	98	0.00106868	0.0126139	tet(X)	TetX	Tetracycline Inactivation Enzyme	Determinant of Tetracycline Resistance	Antibiotic Inactivation	Resfam	FxnlSlxns
MF6791	f__Porphyromonadaceae	f__Porphyromonadaceae	0.00296126	0.00117561	151	0.0121964	0.085672	AAC(6')-Ib7	AAC(6')	Aminoglycoside Acetyltransferase	Determinant of Aminoglycoside Resistance	Antibiotic Inactivation	CARD	ARDatabase
MF0349	f__Porphyromonadaceae	f__Porphyromonadaceae	0.00309467	0.000515975	73	4.89853e-09	2.26277e-07	ant(6)-Ia	ANT(6)	Aminoglycoside Nucleotidyltransferase	Determinant of Aminoglycoside Resistance	Antibiotic Inactivation	NCBI-AMR	ARDatabase
MF0360	f__Porphyromonadaceae	f__Porphyromonadaceae	0.00349723	0.000374616	171	2.18292e-18	7.8585e-16	aad9	ANT(9)	Aminoglycoside Nucleotidyltransferase	Determinant of Aminoglycoside Resistance	Antibiotic Inactivation	NCBI-AMR	ARDatabase
MF6670	f__Bacteroidaceae	f__Bacteroidaceae	-0.00111485	0.000338951	114	0.00110301	0.0129133	cfxA	CfxA beta-lactamase (Class A)	Class A Beta-lactamase	Determinant of Beta-lactam Resistance	Antibiotic Inactivation	CARD	ARDatabase
MF7206	f__Bacteroidaceae	f__Bacteroidaceae	-0.00100113	0.000368726	53	0.00693848	0.0570938	trim_DfrA1_like	Trimethoprim Resistant Dihydrofolate Reductase (dfr)	Dihydrofolate reductase	Determinant of Diaminopyrimidine Resistance	Antibiotic Target Replacement	NCBI-AMR	FxnlSlxns
MF6799	f__Bacteroidaceae	f__Bacteroidaceae	-0.000778234	0.000284024	73	0.00645242	0.0540202	tet(W/N/W)	Tetracycline Resistance Ribosomal Protection Protein	Tetracycline ribosomal protection protein	Determinant of Tetracycline Resistance	Antibiotic Target Protection	CARD	ARDatabase
MF3814	f__Bacteroidaceae	f__Bacteroidaceae	-0.000761988	0.000255797	68	0.00308577	0.030228	TetM-TetW-TetO-TetS	Tetracycline Resistance Ribosomal Protection Protein	Tetracycline ribosomal protection protein	Determinant of Tetracycline Resistance	Antibiotic Target Protection	Resfam	FxnlSlxns
MF8119	f__Bacteroidaceae	f__Bacteroidaceae	-0.000490448	0.000237974	148	0.0400325	0.19947	tet(32)	Tetracycline Resistance Ribosomal Protection Protein	Tetracycline ribosomal protection protein	Determinant of Tetracycline Resistance	Antibiotic Target Protection	Resfinder	FxnlSlxns
MF7646	f__Bacteroidaceae	f__Bacteroidaceae	-0.000314522	0.000113847	83	0.00602608	0.0513465	tet(44)	Tetracycline Resistance Ribosomal Protection Protein	Tetracycline ribosomal protection protein	Determinant of Tetracycline Resistance	Antibiotic Target Protection	NCBI-AMR	ARDatabase
MF4336	f__Bacteroidaceae	f__Bacteroidaceae	-0.000232221	8.38731e-05	47	0.00591331	0.0506855	bla_class_A	Unclassified beta-lactamase (Class A)	Class A Beta-lactamase	Determinant of Beta-lactam Resistance	Antibiotic Inactivation	Resfam	FxnlSlxns
MF8274	f__Bacteroidaceae	f__Bacteroidaceae	0.00034551	0.000178854	62	0.0541552	0.247567	bla_class_A	Unclassified beta-lactamase (Class A)	Class A Beta-lactamase	Determinant of Beta-lactam Resistance	Antibiotic Inactivation	NCBI-AMR	FxnlSlxns
MF7819	f__Bacteroidaceae	f__Bacteroidaceae	0.000356922	0.000133217	61	0.00771069	0.0616855	cepA	CepA beta-lactamase (Class A)	Class A Beta-lactamase	Determinant of Beta-lactam Resistance	Antibiotic Inactivation	NCBI-AMR	ARDatabase
MF4767	f__Bacteroidaceae	f__Bacteroidaceae	0.000541589	0.00024341	53	0.0266886	0.148272	CblA	CblA beta-lactamase (Class A)	Class A Beta-lactamase	Determinant of Beta-lactam Resistance	Antibiotic Inactivation	Resfam	FxnlSlxns
MF7458	f__Bacteroidaceae	f__Bacteroidaceae	0.000589679	0.000210645	194	0.0054115	0.0477624	tetQ	Tetracycline Resistance Ribosomal Protection Protein	Tetracycline ribosomal protection protein	Determinant of Tetracycline Resistance	Antibiotic Target Protection	CARD	ARDatabase
MF0074	f__Bacteroidaceae	f__Bacteroidaceae	0.000629351	0.000224856	319	0.00547278	0.0477624	mef(En2)	Macrolide MFS Antibiotic Efflux Pump	MFS Efflux Pump	Determinant of MLS Resistance	Antibiotic Efflux	NCBI-AMR	ARDatabase
MF8284	f__Bacteroidaceae	f__Bacteroidaceae	0.000705127	0.000269649	57	0.00929871	0.0712241	bla_class_A	Unclassified beta-lactamase (Class A)	Class A Beta-lactamase	Determinant of Beta-lactam Resistance	Antibiotic Inactivation	NCBI-AMR	FxnlSlxns
MF0380	f__Bacteroidaceae	f__Bacteroidaceae	0.00103154	0.000375087	234	0.00631249	0.0531578	lnu(AN2)	LnuAN2_Lincosamide Nucleotidyltransferase	Lincosamide Nucleotidyltransferase	Determinant of MLS Resistance	Antibiotic Inactivation	NCBI-AMR	ARDatabase
MF4779	f__Bacteroidaceae	f__Bacteroidaceae	0.00106885	0.00029925	72	0.000402289	0.00531465	CblA	CblA beta-lactamase (Class A)	Class A Beta-lactamase	Determinant of Beta-lactam Resistance	Antibiotic Inactivation	Resfam	FxnlSlxns
MF8280	f__Bacteroidaceae	f__Bacteroidaceae	0.00146243	0.000359743	105	5.89901e-05	0.000976388	bla_class_A	Unclassified beta-lactamase (Class A)	Class A Beta-lactamase	Determinant of Beta-lactam Resistance	Antibiotic Inactivation	NCBI-AMR	FxnlSlxns
MF4777	f__Bacteroidaceae	f__Bacteroidaceae	0.00231593	0.000475967	261	1.69717e-06	4.36414e-05	CblA	CblA beta-lactamase (Class A)	Class A Beta-lactamase	Determinant of Beta-lactam Resistance	Antibiotic Inactivation	Resfam	FxnlSlxns
MF3763	f__Bacteroidaceae	f__Bacteroidaceae	0.00293042	0.00045005	236	2.52879e-10	2.02303e-08	CblA	CblA beta-lactamase (Class A)	Class A Beta-lactamase	Determinant of Beta-lactam Resistance	Antibiotic Inactivation	CARD	FxnlSlxns
MF7572	f__Lachnospiraceae	f__Lachnospiraceae	-0.00214067	0.000707843	302	0.00269573	0.027337	cfxA	CfxA beta-lactamase (Class A)	Class A Beta-lactamase	Determinant of Beta-lactam Resistance	Antibiotic Inactivation	NCBI-AMR	ARDatabase
MF7206	f__Lachnospiraceae	f__Lachnospiraceae	-0.00163463	0.00055809	53	0.00361333	0.034688	trim_DfrA1_like	Trimethoprim Resistant Dihydrofolate Reductase (dfr)	Dihydrofolate reductase	Determinant of Diaminopyrimidine Resistance	Antibiotic Target Replacement	NCBI-AMR	FxnlSlxns
MF6670	f__Lachnospiraceae	f__Lachnospiraceae	-0.0011193	0.000517683	114	0.0312552	0.162482	cfxA	CfxA beta-lactamase (Class A)	Class A Beta-lactamase	Determinant of Beta-lactam Resistance	Antibiotic Inactivation	CARD	ARDatabase
MF4484	f__Lachnospiraceae	f__Lachnospiraceae	-0.000353505	0.000123121	129	0.00432884	0.039704	bla_class_A	Unclassified beta-lactamase (Class A)	Class A Beta-lactamase	Determinant of Beta-lactam Resistance	Antibiotic Inactivation	Resfam	FxnlSlxns
MF4336	f__Lachnospiraceae	f__Lachnospiraceae	-0.000321902	0.000126947	47	0.0116361	0.0830761	bla_class_A	Unclassified beta-lactamase (Class A)	Class A Beta-lactamase	Determinant of Beta-lactam Resistance	Antibiotic Inactivation	Resfam	FxnlSlxns
MF0350	f__Lachnospiraceae	f__Lachnospiraceae	0.00079208	0.000394123	375	0.0452005	0.220619	aadE	ANT(6)	Aminoglycoside Nucleotidyltransferase	Determinant of Aminoglycoside Resistance	Antibiotic Inactivation	NCBI-AMR	ARDatabase
MF8271	f__Lachnospiraceae	f__Lachnospiraceae	0.0007963	0.000395539	216	0.0448927	0.219882	tet(40)	Tetracycline MFS Antibiotic Efflux Pump	MFS Efflux Pump	Determinant of Tetracycline Resistance	Antibiotic Efflux	CARD	FxnlSlxns
MF8022	f__Lachnospiraceae	f__Lachnospiraceae	0.00168607	0.00071577	218	0.0190269	0.115121	tet(32)	Tetracycline Resistance Ribosomal Protection Protein	Tetracycline ribosomal protection protein	Determinant of Tetracycline Resistance	Antibiotic Target Protection	NCBI-AMR	ARDatabase
MF7652	f__Lachnospiraceae	f__Lachnospiraceae	0.00173361	0.000615289	380	0.00510115	0.0459104	tet(M)	Tetracycline Resistance Ribosomal Protection Protein	Tetracycline ribosomal protection protein	Determinant of Tetracycline Resistance	Antibiotic Target Protection	NCBI-AMR	ARDatabase
MF4736	f__Lachnospiraceae	f__Lachnospiraceae	0.00184071	0.000766159	341	0.0167928	0.106527	TetM-TetW-TetO-TetS	Tetracycline Resistance Ribosomal Protection Protein	Tetracycline ribosomal protection protein	Determinant of Tetracycline Resistance	Antibiotic Target Protection	Resfam	FxnlSlxns
MF7478	f__Lachnospiraceae	f__Lachnospiraceae	0.00188852	0.000745414	341	0.0117096	0.0830761	tetO	Tetracycline Resistance Ribosomal Protection Protein	Tetracycline ribosomal protection protein	Determinant of Tetracycline Resistance	Antibiotic Target Protection	CARD	FxnlSlxns
MF0093	f__Lachnospiraceae	f__Lachnospiraceae	0.00197658	0.000851503	344	0.0208607	0.123113	tet(W)	Tetracycline Resistance Ribosomal Protection Protein	Tetracycline ribosomal protection protein	Determinant of Tetracycline Resistance	Antibiotic Target Protection	NCBI-AMR	ARDatabase
MF3814	f__Bifidobacteriaceae	f__Bifidobacteriaceae	-0.00144018	0.000461235	68	0.00193677	0.0214535	TetM-TetW-TetO-TetS	Tetracycline Resistance Ribosomal Protection Protein	Tetracycline ribosomal protection protein	Determinant of Tetracycline Resistance	Antibiotic Target Protection	Resfam	FxnlSlxns
MF1224	f__Bifidobacteriaceae	f__Bifidobacteriaceae	-0.00135143	0.000684646	209	0.049142	0.233546	TetM-TetW-TetO-TetS	Tetracycline Resistance Ribosomal Protection Protein	Tetracycline ribosomal protection protein	Determinant of Tetracycline Resistance	Antibiotic Target Protection	Resfam	FxnlSlxns
MF7646	f__Bifidobacteriaceae	f__Bifidobacteriaceae	-0.000410878	0.000204917	83	0.0457064	0.220687	tet(44)	Tetracycline Resistance Ribosomal Protection Protein	Tetracycline ribosomal protection protein	Determinant of Tetracycline Resistance	Antibiotic Target Protection	NCBI-AMR	ARDatabase
MF4336	f__Bifidobacteriaceae	f__Bifidobacteriaceae	-0.000406015	0.000150511	47	0.00730686	0.0591116	bla_class_A	Unclassified beta-lactamase (Class A)	Class A Beta-lactamase	Determinant of Beta-lactam Resistance	Antibiotic Inactivation	Resfam	FxnlSlxns
MF7194	f__Bifidobacteriaceae	f__Bifidobacteriaceae	0.0010682	0.00045961	110	0.0206755	0.122522	tet_protect	Tetracycline Resistance MFS Efflux Pump	MFS Efflux Pump	Determinant of Tetracycline Resistance	Antibiotic Efflux	NCBI-AMR	FxnlSlxns
MF6872	f__Bifidobacteriaceae	f__Bifidobacteriaceae	0.00128795	0.000665072	303	0.0535842	0.245972	mdtN	MFS Antibiotic Efflux Pump	MFS Efflux Pump	Determinant of Resistance to Multidrug Class	Antibiotic Efflux	CARD	ARDatabase
MF4718	f__Bifidobacteriaceae	f__Bifidobacteriaceae	0.00165393	0.000648715	61	0.0111925	0.0813997	CAT	Unclassified Chloramphenicol Acetyltransferase	Chloramphenicol Acetyltransferase	Determinant of Phenicol Resistance	Antibiotic Inactivation	Pfam	FxnlSlxns
MF3763	f__Bifidobacteriaceae	f__Bifidobacteriaceae	0.00184621	0.000809297	236	0.023131	0.134304	CblA	CblA beta-lactamase (Class A)	Class A Beta-lactamase	Determinant of Beta-lactam Resistance	Antibiotic Inactivation	CARD	FxnlSlxns
MF4777	f__Bifidobacteriaceae	f__Bifidobacteriaceae	0.00191712	0.000859501	261	0.0263178	0.147462	CblA	CblA beta-lactamase (Class A)	Class A Beta-lactamase	Determinant of Beta-lactam Resistance	Antibiotic Inactivation	Resfam	FxnlSlxns

## Sheet: Table S7
Table S7: Results from MaAsLin2 model for AMR gene abundance including all cohort metadata variables from Table S1 as predictor variables and Subject_ID and travel destination as random effects. Source data for this model is available in the source data file.
metadata	feature	value	coef	stderr	N	N.not.0	pval	qval
Timepoint	MF7466	Pre-travel	-0.0363798	0.00385458	380	228	1.43803e-17	7.59282e-14
Timepoint	MF6427	Pre-travel	-0.0383782	0.00426151	380	274	2.31787e-16	6.11918e-13
Timepoint	MF6791	Pre-travel	-0.0699941	0.00865028	380	151	6.98307e-14	1.12282e-10
Timepoint	MF7296	Pre-travel	-0.0262197	0.0032534	380	136	8.50623e-14	1.12282e-10
Timepoint	MF7201	Pre-travel	-0.0515394	0.00679171	380	155	3.29645e-13	3.48105e-10
Timepoint	MF6428	Pre-travel	-0.0356572	0.00462156	380	286	6.74882e-13	5.93896e-10
Timepoint	MF4599	Pre-travel	-0.0913694	0.012339	380	188	4.2173e-12	2.62438e-09
Timepoint	MF7378	Pre-travel	-0.0404092	0.00544877	380	281	3.94818e-12	2.62438e-09
Timepoint	MF7418	Pre-travel	-0.0408873	0.00552918	380	127	4.47338e-12	2.62438e-09
Timepoint	MF7196	Pre-travel	-0.0781241	0.0107539	380	262	9.52628e-12	5.02988e-09
Timepoint	MF0298	Pre-travel	-0.0358827	0.00498466	380	175	1.39467e-11	6.69442e-09
Timepoint	MF7533	Pre-travel	-0.0422322	0.00590216	380	188	1.78776e-11	7.86613e-09
Timepoint	MF7408	Pre-travel	-0.0273837	0.00385146	380	242	2.31865e-11	9.41727e-09
Timepoint	MF7182	Pre-travel	-0.0179824	0.00277798	380	76	3.44928e-10	1.30087e-07
Timepoint	MF8117	Pre-travel	-0.0243205	0.00388189	380	87	1.14407e-09	4.02712e-07
Timepoint	MF7214	Pre-travel	0.0329371	0.00522719	380	89	2.02947e-09	6.69725e-07
Timepoint	MF7516	Pre-travel	-0.0142496	0.00234072	380	91	6.25672e-09	1.94326e-06
Timepoint	MF4600	Pre-travel	0.03358	0.0055727	380	379	8.6339e-09	2.53261e-06
Timepoint	MF0500	Pre-travel	-0.02124	0.00369826	380	115	2.10161e-08	5.84026e-06
Timepoint	MF7515	Pre-travel	-0.0152207	0.00265565	380	100	2.22144e-08	5.86459e-06
Timepoint	MF3617	Pre-travel	0.0371054	0.0064042	380	98	2.83163e-08	7.11952e-06
Timepoint	MF0350	Pre-travel	0.0215309	0.00382473	380	375	6.45852e-08	1.55005e-05
Timepoint	MF3849	Pre-travel	0.0460824	0.00870704	380	351	3.3237e-07	7.63007e-05
Timepoint	MF6420	Pre-travel	-0.0151885	0.0028828	380	316	3.72362e-07	8.19196e-05
Timepoint	MF6419	Pre-travel	-0.0352357	0.00679456	380	302	5.50513e-07	0.000116268
Timepoint	MF6872	Pre-travel	-0.0289766	0.00565284	380	303	7.28323e-07	0.000147906
Timepoint	MF7206	Pre-travel	-0.0281587	0.0055479	380	53	9.20602e-07	0.000180029
Timepoint	MF8358	Pre-travel	-0.0366383	0.00745817	380	64	1.94124e-06	0.000366063
Timepoint	MF7652	Pre-travel	0.0353843	0.00734921	380	380	3.01161e-06	0.00054832
Timepoint	MF6837	Pre-travel	-0.0173378	0.00360834	380	321	3.14564e-06	0.000553632
Timepoint	MF6873	Pre-travel	-0.0303071	0.00636802	380	305	3.85257e-06	0.00065618
Timepoint	MF0093	Pre-travel	0.0378701	0.00819518	380	344	7.05449e-06	0.00116399
Timepoint	MF6868	Pre-travel	-0.0189636	0.00422713	380	308	1.25711e-05	0.00201138
Timepoint	MF6838	Pre-travel	-0.01744	0.00395178	380	317	1.7095e-05	0.00257891
Timepoint	MF7646	Pre-travel	0.00693558	0.00157013	380	83	1.68106e-05	0.00257891
Timepoint	MF7478	Pre-travel	0.0319801	0.00735014	380	341	2.21569e-05	0.00316185
Timepoint	MF7562	Pre-travel	-0.0102716	0.00238439	380	48	2.17386e-05	0.00316185
Timepoint	MF7455	Pre-travel	-0.023865	0.00557891	380	299	2.99566e-05	0.00416238
Timepoint	MF4736	Pre-travel	0.0349561	0.0082274	380	341	3.37178e-05	0.00456487
Timepoint	MF7209	Pre-travel	-0.0260116	0.00617925	380	56	3.9539e-05	0.00521915
Timepoint	MF6415	Pre-travel	-0.0147727	0.00351488	380	311	4.06067e-05	0.00522935
Timepoint	MF4727	Pre-travel	-0.00658699	0.00159397	380	48	4.54889e-05	0.0057186
Antibiotic_use	MF0360	Yes	0.0443261	0.0105751	380	171	4.77903e-05	0.0058682
Timepoint	MF7178	Pre-travel	-0.0205792	0.00500174	380	60	5.78956e-05	0.00694748
Timepoint	MF0522	Pre-travel	-0.0096446	0.00235255	380	57	6.13958e-05	0.00720377
Timepoint	MF0360	Pre-travel	0.0102972	0.00266936	380	171	0.000157006	0.0180216
Reason_for_travelling	MF0467	Holiday	-0.175709	0.0455649	380	147	0.000172129	0.019337
Timepoint	MF7375	Pre-travel	-0.025387	0.00663544	380	301	0.0001769	0.019459
Timepoint	MF6616	Pre-travel	-0.0237049	0.00624668	380	298	0.000198863	0.0214286
Timepoint	MF6840	Pre-travel	-0.0150795	0.00401852	380	317	0.000232818	0.0245856
Timepoint	MF7445	Pre-travel	-0.0286636	0.00765641	380	299	0.000240507	0.0248996
Timepoint	MF7481	Pre-travel	-0.0153427	0.00417875	380	85	0.000280795	0.0285114
Timepoint	MF1224	Pre-travel	0.0173634	0.0047568	380	209	0.000338981	0.0337702
Tap_water_consumption	MF4779	Seldom	-0.131352	0.0364853	380	72	0.000436457	0.0426758
Tap_water_consumption	MF4779	Occasionally	-0.15041	0.0419625	380	72	0.000459926	0.0441529
Antibiotic_use	MF0456	Unknown	0.0509872	0.0145382	380	108	0.000602229	0.0567816
Timepoint	MF6418	Pre-travel	-0.0214665	0.00616248	380	292	0.0006151	0.0569777
Timepoint	MF7377	Pre-travel	-0.0208485	0.00599507	380	308	0.000627797	0.0571511
Timepoint	MF0092	Pre-travel	0.0198807	0.00573221	380	368	0.000648676	0.0579015
Tap_water_consumption	MF4779	Never	-0.121776	0.0350202	380	72	0.000668937	0.0579015
Consumption_raw_vegetables	MF6939	Never	-0.0798809	0.0229483	380	252	0.000659294	0.0579015
corticosteroid_use	MF3783	Yes	0.0380472	0.0109676	380	48	0.000690485	0.0588026
Timepoint	MF6663	Pre-travel	-0.0147452	0.0042812	380	304	0.000705497	0.0591273
Timepoint	MF3792	Pre-travel	-0.0121568	0.0035951	380	298	0.00087605	0.0722741
Timepoint	MF6426	Pre-travel	-0.0192688	0.00573237	380	298	0.000938427	0.0750742
Timepoint	MF6870	Pre-travel	-0.0146977	0.00437159	380	296	0.000936194	0.0750742
Timepoint	MF6871	Pre-travel	-0.0137888	0.00417056	380	303	0.00113163	0.0891789
Timepoint	MF0074	Pre-travel	0.00840237	0.00255708	380	319	0.00121161	0.0927146
Reason_for_travelling	MF0467	Religious	-0.184036	0.0557084	380	147	0.00120077	0.0927146
Food_consumption_foodstalls	MF0522	Sometimes	-0.0230466	0.00708441	380	57	0.00141802	0.106959
Timepoint	MF6425	Pre-travel	-0.0192888	0.00597989	380	305	0.00148138	0.110165
Antibiotic_use	MF4767	Yes	0.0341748	0.0106372	380	53	0.00161774	0.117706
Tap_water_consumption	MF8280	Occasionally	-0.18738	0.058357	380	105	0.00162737	0.117706
Timepoint	MF6651	Pre-travel	-0.00920497	0.0029024	380	55	0.00173167	0.122405
Diarrhoea_post_travel	MF7418	Yes	0.038762	0.0121453	380	127	0.00173871	0.122405
Consumption_salads	MF6799	Occasionally	-0.0477351	0.014993	380	73	0.00177681	0.123441
Hospitalisation_abroad	MF4718	Yes	0.0844886	0.0268131	380	61	0.00197441	0.135388
Timepoint	MF8345	Pre-travel	0.0117017	0.00377999	380	83	0.00226212	0.153128
Main_travel_accomodation	MF8319	Others	0.021942	0.00707193	380	41	0.00230289	0.153915
Main_travel_accomodation	MF7562	Ship	0.0639484	0.0210551	380	48	0.00257543	0.16788
Antibiotic_use	MF8284	Yes	0.0369834	0.0120483	380	57	0.00255629	0.16788
Consumption_raw_vegetables	MF4736	Never	0.121199	0.0402784	380	341	0.00308788	0.196434
Main_travel_accomodation	MF8319	Luxury accomodation	0.0192483	0.0063927	380	41	0.00306914	0.196434
Tap_water_consumption	MF8280	Seldom	-0.15221	0.0508802	380	105	0.00325944	0.204879
Timepoint	MF6422	Pre-travel	-0.0204276	0.00686387	380	298	0.00330104	0.205053
Tap_water_consumption	MF0380	Occasionally	-0.227256	0.0761715	380	234	0.00334137	0.205144
Travel_duration	MF7562	Travel_duration	0.000422115	0.000144116	380	48	0.00365717	0.221952
Reason_for_travelling	MF6670	Holiday	-0.135409	0.0459602	380	114	0.00374525	0.224715
Tap_water_consumption	MF8280	Never	-0.14321	0.0488112	380	105	0.00388788	0.230652
Timepoint	MF3557	Pre-travel	-0.0213847	0.0073318	380	299	0.00396586	0.232664
Food_consumption_foodstalls	MF0522	Never	-0.0213944	0.00733609	380	57	0.00410314	0.238072
Age	MF0093	Age	0.0015907	0.000546835	380	344	0.0041981	0.240934
Consumption_salads	MF6799	Never	-0.0483846	0.0166836	380	73	0.00430714	0.244534
Diarrhoea_post_travel	MF0522	Yes	0.01376	0.00475623	380	57	0.00440862	0.247633

## Sheet: Table S8
		Table S8: ShortBRED IDs and metadata for genes detected in Netherland traveler stool samples.
Shortbred_ID	ShortBRED_ARG_Family_Name	DbAcc_ID	Product_Name	Database_Source	AMR_GeneFamily	AMR_Classification	Drug_Targets	AMR_Mechanism	Marker_Source
MF6791	gb|AKN19287_1|ARO_3002578|AAC(6_)-Ib7__Salmonella_enterica	ARO:3002578	AAC(6')-Ib7	CARD	AAC(6')	Aminoglycoside Acetyltransferase	Determinant of Aminoglycoside Resistance	Antibiotic Inactivation	ARDatabase
MF8171	1105502108|WP_071846260_1|KF525276_1|1|1|aac(6_)-set_A|aac(6_)-set_A|acetyltransferase|aminoglycoside_6_-N-acetyltransferase	WP_071846260_1	aac(6_)-set_A	NCBI-AMR	AAC(6')	Aminoglycoside Acetyltransferase	Determinant of Aminoglycoside Resistance	Antibiotic Inactivation	ARDatabase
MF7377	gb|AAC74000_1|ARO_3003950|msbA__Escherichia_coli	ARO:3003950	msbA	CARD	ABC Transporter	ABC Transporter	Determinant of Resistance to Multidrug Class	Antibiotic Efflux	ARDatabase
MF7378	gb|AAC75271_1|ARO_3003952|yojI__Escherichia_coli	ARO:3003952	YojI	CARD	ABC Transporter	ABC Transporter	Determinant of Resistance to Peptide Antibiotics	Antibiotic Efflux	ARDatabase
MF7466	gb|CBJ02047_1|ARO_3004611|Escherichia_coli_ampC1	ARO:3004611	ampC1	CARD	ampC-type beta-lactamase (Class C)	Class C Beta-lactamase	Determinant of Beta-lactam Resistance	Antibiotic Inactivation	ARDatabase
MF7455	gb|BAJ42218_1|ARO_3004612|Escherichia_coli_ampH	ARO:3004612	ampH	CARD	ampC-type beta-lactamase (Class C)	Class C Beta-lactamase	Determinant of Beta-lactam Resistance	Antibiotic Inactivation	ARDatabase
MF3557	DLFM05_00016|Ecoli-LibraryB_PIP_10|gene-8|-|3204-4094|complete	RF0055	ClassC-AmpC	Resfam	ampC-type beta-lactamase (Class C)	Class C Beta-lactamase	Determinant of Beta-lactam Resistance	Antibiotic Inactivation	FxnlSlxns
MF4727	DLFM11_05736|P15SR5_SXT_6|gene-3|-|1469-2329|complete	RF0027	ANT3	Resfam	Unclassified Aminoglycoside Nucleotidyltransferase (ANT)	Aminoglycoside Nucleotidyltransferase	Determinant of Aminoglycoside Resistance	Antibiotic Inactivation	FxnlSlxns
MF7516	1028081053|WP_063840436_1|EF051038_1|1|1|aadA21|aadA21|nucleotidyltransferase|ANT(3__)-Ia_family_aminoglycoside_nucleotidyltransferase_AadA21	WP_063840436_1	aadA21	NCBI-AMR	ANT(3'')	Aminoglycoside Nucleotidyltransferase	Determinant of Aminoglycoside Resistance	Antibiotic Inactivation	ARDatabase
MF8117	DLFM13_05946|CBP19SR2_SXT_47|gene-4|+|2463-3242|complete	AM711129	aadA24	Resfinder	ANT(3'')	Aminoglycoside Nucleotidyltransferase	Determinant of Aminoglycoside Resistance	Antibiotic Inactivation	FxnlSlxns
MF7515	1028081033|WP_063840416_1|FJ460181_2|1|1|aadA17|ant(3__)-Ia|nucleotidyltransferase|ANT(3__)-Ia_family_aminoglycoside_nucleotidyltransferase_AadA17	WP_063840416_1	ant(3'')-Ia	NCBI-AMR	ANT(3'')	Aminoglycoside Nucleotidyltransferase	Determinant of Aminoglycoside Resistance	Antibiotic Inactivation	ARDatabase
MF0350	447178612|WP_001255868_1|DQ220741_1|1|1|aadE|aadE|nucleotidyltransferase|aminoglycoside_6-adenylyltransferase_AadE	WP_001255868.1	aadE	NCBI-AMR	ANT(6)	Aminoglycoside Nucleotidyltransferase	Determinant of Aminoglycoside Resistance	Antibiotic Inactivation	ARDatabase
MF0691	DLFM02_00521|F24_TGC_7|gene-5|+|2583-3515|complete	NF033387.1	aadS	NCBI-AMR	ANT(6)	Aminoglycoside Nucleotidyltransferase	Determinant of Aminoglycoside Resistance	Antibiotic Inactivation	FxnlSlxns
MF0349	447178610|WP_001255866_1|AF330699_1|1|1|ant(6)-Ia|ant(6)-Ia|nucleotidyltransferase|aminoglycoside_nucleotidyltransferase_ANT(6)-Ia	WP_001255866.1	ant(6)-Ia	NCBI-AMR	ANT(6)	Aminoglycoside Nucleotidyltransferase	Determinant of Aminoglycoside Resistance	Antibiotic Inactivation	ARDatabase
MF0360	488642079|WP_002578722_1|AY701528_1|1|1|aad9|aad9|nucleotidyltransferase|ANT(9)_family_aminoglycoside_nucleotidyltransferase	WP_002578722.1	aad9	NCBI-AMR	ANT(9)	Aminoglycoside Nucleotidyltransferase	Determinant of Aminoglycoside Resistance	Antibiotic Inactivation	ARDatabase
MF0298	1391852856|WP_109545041_1|NG_056002_2|1|1|aph(3__)-Ib|aph(3__)-Ib|phosphotransferase|aminoglycoside_O-phosphotransferase_APH(3__)-Ib	WP_109545041.1	aph(3'')-Ib	NCBI-AMR	APH(3'')	Aminoglycoside Phosphotransferase	Determinant of Aminoglycoside Resistance	Antibiotic Inactivation	ARDatabase
MF7525	1028082228|WP_063841495_1|AF330699_1|1|1|aph(3_)-IIIa|aph(3_)-IIIa|phosphotransferase|aminoglycoside_O-phosphotransferase_APH(3_)-IIIa	WP_063841495_1	aph(3_)-IIIa	NCBI-AMR	APH(3')	Aminoglycoside Phosphotransferase	Determinant of Aminoglycoside Resistance	Antibiotic Inactivation	ARDatabase
MF7533	1028083027|WP_063842183_1|AF024602_1|1|1|aph(6)-Id|aph(6)-Id|phosphotransferase|aminoglycoside_O-phosphotransferase_APH(6)-Id	WP_063842183_1	aph(6)-Id	NCBI-AMR	APH(6)	Aminoglycoside Phosphotransferase	Determinant of Aminoglycoside Resistance	Antibiotic Inactivation	ARDatabase
MF3847	DLFM07_02097|01I-012_CHL_7|gene-2|-|233-859|complete	ARO:3004454	Campylobacter coli chloramphenicol acetyltransferase	CARD	Campylobacter coli chloramphenicol acetyltransferase	Chloramphenicol Acetyltransferase	Determinant of Phenicol Resistance	Antibiotic Inactivation	FxnlSlxns
MF3799	DLFM07_01285|03E-000_CHL_13|gene-3|-|1411-2034|complete	RF0045	CAT	Pfam	Unclassified Chloramphenicol Acetyltransferase	Chloramphenicol Acetyltransferase	Determinant of Phenicol Resistance	Antibiotic Inactivation	FxnlSlxns
MF4524	DLFM11_02252|P15SR5_CHL_38|gene-2|-|242-832|complete	RF0045	CAT	Pfam	Unclassified Chloramphenicol Acetyltransferase	Chloramphenicol Acetyltransferase	Determinant of Phenicol Resistance	Antibiotic Inactivation	FxnlSlxns
MF4718	DLFM11_05644|P09SR3_SXT_12|gene-3|+|925-1548|complete	RF0045	CAT	Pfam	Unclassified Chloramphenicol Acetyltransferase	Chloramphenicol Acetyltransferase	Determinant of Phenicol Resistance	Antibiotic Inactivation	FxnlSlxns
MF8278	DLFM02_01037|F21_CHL_3|gene-2|-|400-1023|complete	NF000491.1	chloram_CatA	NCBI-AMR	CatA chloramphenicol acetyltransferase	Chloramphenicol Acetyltransferase	Determinant of Phenicol Resistance	Antibiotic Inactivation	FxnlSlxns
MF8325	DLFM06_01957|1-A5_AMC_11|gene-2|+|1564-2187|complete	NF000491.1	chloram_CatA	NCBI-AMR	CatA chloramphenicol acetyltransferase	Chloramphenicol Acetyltransferase	Determinant of Phenicol Resistance	Antibiotic Inactivation	FxnlSlxns
MF7562	1028084250|WP_063843218_1|AF326777_3|1|1|catA1|catA1|acetyltransferase|type_A-1_chloramphenicol_O-acetyltransferase	WP_063843218_1	catA	NCBI-AMR	CatA chloramphenicol acetyltransferase	Chloramphenicol Acetyltransferase	Determinant of Phenicol Resistance	Antibiotic Inactivation	ARDatabase
MF8373	DLFM02_01825|F15_CHL_3|gene-2|+|482-1108|complete	WP_043774378.1	catA	NDARO	CatA chloramphenicol acetyltransferase	Chloramphenicol Acetyltransferase	Determinant of Phenicol Resistance	Antibiotic Inactivation	FxnlSlxns
MF0040	1028084265|WP_063843233_1|X15100_1|1|1|catD|catD|acetyltransferase|type_A-11_chloramphenicol_O-acetyltransferase_CatD	WP_063843233.1	catD	NCBI-AMR	CatD_chloramphenicol acetyltransferase	Chloramphenicol Acetyltransferase	Determinant of Phenicol Resistance	Antibiotic Inactivation	ARDatabase
MF4767	DLFM11_06753|P08SR4_TIC_168|gene-2|-|438-1343|complete	RF0046	CblA	Resfam	CblA beta-lactamase (Class A)	Class A Beta-lactamase	Determinant of Beta-lactam Resistance	Antibiotic Inactivation	FxnlSlxns
MF4777	DLFM11_07237|P22SR4_TIC_292|gene-3|-|1360-2250|complete	RF0046	CblA	Resfam	CblA beta-lactamase (Class A)	Class A Beta-lactamase	Determinant of Beta-lactam Resistance	Antibiotic Inactivation	FxnlSlxns
MF4779	DLFM11_07316|P24SR4_TIC_6|gene-3|+|862-1755|complete	RF0046	CblA	Resfam	CblA beta-lactamase (Class A)	Class A Beta-lactamase	Determinant of Beta-lactam Resistance	Antibiotic Inactivation	FxnlSlxns
MF3763	DLFM07_00747|05A-000_CAZ_3|gene-2|-|399-1313|complete	ARO:3002999	CblA	CARD	CblA beta-lactamase (Class A)	Class A Beta-lactamase	Determinant of Beta-lactam Resistance	Antibiotic Inactivation	FxnlSlxns
MF7819	1028110992|WP_063865204_1|U05884_1|1|1|cepA-29|cepA|hydrolase|class_A_extended-spectrum_beta-lactamase_CepA-29	WP_063865204_1	cepA	NCBI-AMR	CepA beta-lactamase (Class A)	Class A Beta-lactamase	Determinant of Beta-lactam Resistance	Antibiotic Inactivation	ARDatabase
MF7572	1028084269|WP_063843237_1|U38243_1|1|1|cfxA|cfxA|hydrolase|class_A_broad-spectrum_beta-lactamase_CfxA	WP_063843237_1	cfxA	NCBI-AMR	CfxA beta-lactamase (Class A)	Class A Beta-lactamase	Determinant of Beta-lactam Resistance	Antibiotic Inactivation	ARDatabase
MF6670	gb|ACT97371_1|ARO_3003097|CfxA6__uncultured_organism_	ARO:3003097	cfxA	CARD	CfxA beta-lactamase (Class A)	Class A Beta-lactamase	Determinant of Beta-lactam Resistance	Antibiotic Inactivation	ARDatabase
MF4336	DLFM10_01736|F7_CAZ_41|gene-2|+|778-1740|complete	RF0053	bla_class_A	Resfam	Unclassified beta-lactamase (Class A)	Class A Beta-lactamase	Determinant of Beta-lactam Resistance	Antibiotic Inactivation	FxnlSlxns
MF4484	DLFM11_01743|P10SR5_CAZ_1|gene-2|+|552-1529|complete	RF0053	bla_class_A	Resfam	Unclassified beta-lactamase (Class A)	Class A Beta-lactamase	Determinant of Beta-lactam Resistance	Antibiotic Inactivation	FxnlSlxns
MF4599	DLFM11_03178|P13SR3_DCS_11|gene-1|+|258-644|complete	RF0053	bla_class_A	Resfam	Unclassified beta-lactamase (Class A)	Class A Beta-lactamase	Determinant of Beta-lactam Resistance	Antibiotic Inactivation	FxnlSlxns
MF8274	DLFM02_00399|F26_PEN_8|gene-2|-|262-1152|complete	NF012099.1	bla_class_A	NCBI-AMR	Unclassified beta-lactamase (Class A)	Class A Beta-lactamase	Determinant of Beta-lactam Resistance	Antibiotic Inactivation	FxnlSlxns
MF8280	DLFM02_01982|F15_ATM_11|gene-2|-|83-988|complete	NF012099.1	bla_class_A	NCBI-AMR	Unclassified beta-lactamase (Class A)	Class A Beta-lactamase	Determinant of Beta-lactam Resistance	Antibiotic Inactivation	FxnlSlxns
MF8284	DLFM02_03368|F33_PEN_2|gene-2|-|718-1620|complete	NF012099.1	bla_class_A	NCBI-AMR	Unclassified beta-lactamase (Class A)	Class A Beta-lactamase	Determinant of Beta-lactam Resistance	Antibiotic Inactivation	FxnlSlxns
MF8323	DLFM06_01729|1-C6_AMP_3|gene-7|-|2838-3896|complete	NF033085.1	bla_class_C	NCBI-AMR	Unclassified beta-lactamase (Class C)	Class C Beta-lactamase	Determinant of Beta-lactam Resistance	Antibiotic Inactivation	FxnlSlxns
MF3617	DLFM06_00479|4-B7_PEN_19|gene-4|-|926-2071|complete	RF0057	CMY-LAT-MOX-ACT-MIR-FOX	Resfam	CMY-LAT-MOX-ACT-MIR-FOX beta-lactamase (Class C)	Class C Beta-lactamase	Determinant of Beta-lactam Resistance	Antibiotic Inactivation	FxnlSlxns
MF3792	DLFM07_01163|03F-000_AMX_2|gene-6|-|1663-2616|complete	RF0057	CMY-LAT-MOX-ACT-MIR-FOX	Resfam	CMY-LAT-MOX-ACT-MIR-FOX beta-lactamase (Class C)	Class C Beta-lactamase	Determinant of Beta-lactam Resistance	Antibiotic Inactivation	FxnlSlxns
MF7214	DLFM10_01426|F11_AMP_8|gene-4|+|1020-2153|complete	RF0057	CMY-LAT-MOX-ACT-MIR-FOX	Resfam	CMY-LAT-MOX-ACT-MIR-FOX beta-lactamase (Class C)	Class C Beta-lactamase	Determinant of Beta-lactam Resistance	Antibiotic Inactivation	FxnlSlxns
MF6651	gb|ACI32877_1|ARO_3002859|dfrA14__Escherichia_coli_	ARO:3002859	dfrA14	CARD	Trimethoprim Resistant Dihydrofolate Reductase (dfr)	Dihydrofolate reductase	Determinant of Diaminopyrimidine Resistance	Antibiotic Target Replacement	ARDatabase
MF7922	488251003|WP_002322211_1|AF028812_1|1|1|dfrF|dfrF|insensitivity|trimethoprim-resistant_dihydrofolate_reductase_DfrF	WP_002322211_1	dfrF	NCBI-AMR	Trimethoprim Resistant Dihydrofolate Reductase (dfr)	Dihydrofolate reductase	Determinant of Diaminopyrimidine Resistance	Antibiotic Target Replacement	ARDatabase
MF4730	DLFM11_05771|P22SR1_SXT_1|gene-1|+|107-997|complete	RF0165	Dihydropteroate	TIGRFam	Trimethoprim Resistant Dihydrofolate Reductase (dfr)	Dihydrofolate reductase	Determinant of Diaminopyrimidine Resistance	Antibiotic Target Replacement	FxnlSlxns
MF7178	DLFM13_02543|CBP07SR2_SXT_31|gene-3|+|1863-2336|complete	NF000330.1	trim_DfrA1_like	NCBI-AMR	Trimethoprim Resistant Dihydrofolate Reductase (dfr)	Dihydrofolate reductase	Determinant of Diaminopyrimidine Resistance	Antibiotic Target Replacement	FxnlSlxns
MF7201	DLFM13_05872|CBP19SR2_PIP_13|gene-3|-|1165-1869|complete	NF000330.1	trim_DfrA1_like	NCBI-AMR	Trimethoprim Resistant Dihydrofolate Reductase (dfr)	Dihydrofolate reductase	Determinant of Diaminopyrimidine Resistance	Antibiotic Target Replacement	FxnlSlxns
MF7206	DLFM13_06428|CBP22SR2_CHL_31|gene-5|+|2731-3279|complete	NF000330.1	trim_DfrA1_like	NCBI-AMR	Trimethoprim Resistant Dihydrofolate Reductase (dfr)	Dihydrofolate reductase	Determinant of Diaminopyrimidine Resistance	Antibiotic Target Replacement	FxnlSlxns
MF7209	DLFM13_06962|CBP23SR2_SXT_11|gene-5|+|4061-4690|complete	NF000330.1	trim_DfrA1_like	NCBI-AMR	Trimethoprim Resistant Dihydrofolate Reductase (dfr)	Dihydrofolate reductase	Determinant of Diaminopyrimidine Resistance	Antibiotic Target Replacement	FxnlSlxns
MF8358	DLFM11_07364|P01SR2_TMP_8|gene-1|+|37-738|complete	NF000330.1	trim_DfrA1_like	NCBI-AMR	Trimethoprim Resistant Dihydrofolate Reductase (dfr)	Dihydrofolate reductase	Determinant of Diaminopyrimidine Resistance	Antibiotic Target Replacement	FxnlSlxns
MF0435	499327877|WP_011018369_1|AY082384_1|1|1|erm(B)|erm(B)|target_modification|23S_rRNA_(adenine(2058)-N(6))-methyltransferase_Erm(B)	WP_011018369.1	Erm	NCBI-AMR	Erm 23S Ribosomal RNA Methyltransferase	23S rRNA Methyltransferase	Determinant of MLS Resistance	Antibiotic Target Alteration	ARDatabase
MF7603	1028086413|WP_063844787_1|L42817_1|1|1|erm(G)|erm(G)|target_modification|23S_rRNA_(adenine(2058)-N(6))-methyltransferase_Erm(G)	WP_063844787_1	Erm	NCBI-AMR	Erm 23S Ribosomal RNA Methyltransferase	23S rRNA Methyltransferase	Determinant of MLS Resistance	Antibiotic Target Alteration	ARDatabase
MF0443	499413378|WP_011100845_1|AJ488494_2|1|1|erm(T)|erm(T)|target_modification|23S_rRNA_(adenine(2058)-N(6))-methyltransferase_Erm(T)	WP_011100845.1	Erm	NCBI-AMR	Erm 23S Ribosomal RNA Methyltransferase	23S rRNA Methyltransferase	Determinant of MLS Resistance	Antibiotic Target Alteration	ARDatabase
MF0380	490437755|WP_004308783_1|AF251288_1|1|1|lnu(AN2)|lnu(AN2)|nucleotidyltransferase|lincosamide_nucleotidyltransferase_Lnu(AN2)	WP_004308783.1	lnu(AN2)	NCBI-AMR	LnuAN2_Lincosamide Nucleotidyltransferase	Lincosamide Nucleotidyltransferase	Determinant of MLS Resistance	Antibiotic Inactivation	ARDatabase
MF0467	501051336|WP_012102963_1|CP000673_1|1|1|mef(A)|mef(A)|efflux|macrolide_efflux_MFS_transporter_Mef(A)	WP_012102963.1	mef(A)	NCBI-AMR	Macrolide MFS Antibiotic Efflux Pump	MFS Efflux Pump	Determinant of MLS Resistance	Antibiotic Efflux	ARDatabase
MF0074	1028097032|WP_063853729_1|AF251288_1|1|1|mef(En2)|mef(En2)|efflux|macrolide_efflux_MFS_transporter_Mef(En2)	WP_063853729.1	mef(En2)	NCBI-AMR	Macrolide MFS Antibiotic Efflux Pump	MFS Efflux Pump	Determinant of MLS Resistance	Antibiotic Efflux	ARDatabase
MF6840	gb|BAA16547_1|ARO_3000027|emrA__Escherichia_coli	ARO:3000027	EmrA	CARD	MFS Antibiotic Efflux Pump	MFS Efflux Pump	Determinant of Resistance to Multidrug Class	Antibiotic Efflux	ARDatabase
MF6422	gb|AAC75733_1|ARO_3000074|emrB__Escherichia_coli	ARO:3000074	EmrB	CARD	MFS Antibiotic Efflux Pump	MFS Efflux Pump	Determinant of Resistance to Multidrug Class	Antibiotic Efflux	ARDatabase
MF6837	gb|BAA11236_1|ARO_3000206|emrK__Escherichia_coli_	ARO:3000206	EmrK	CARD	MFS Antibiotic Efflux Pump	MFS Efflux Pump	Determinant of Resistance to Multidrug Class	Antibiotic Efflux	ARDatabase
MF6838	gb|BAA11237_1|ARO_3000254|emrY__Escherichia_coli_	ARO:3000254	EmrY	CARD	MFS Antibiotic Efflux Pump	MFS Efflux Pump	Determinant of Resistance to Multidrug Class	Antibiotic Efflux	ARDatabase
MF7453	gb|BAH63251_1|ARO_3004580|Klebsiella_pneumoniae_KpnE	ARO:3004580	KpnE	CARD	MFS Antibiotic Efflux Pump	MFS Efflux Pump	Determinant of Resistance to Multidrug Class	Antibiotic Efflux	ARDatabase
MF6616	gb|ABV18113_1|ARO_3001329|mdtG__Escherichia_coli	ARO:3001329	mdtG	CARD	MFS Antibiotic Efflux Pump	MFS Efflux Pump	Determinant of Resistance to Multidrug Class	Antibiotic Efflux	ARDatabase
MF6415	gb|AAC74149_2|ARO_3001216|mdtH__Escherichia_coli	ARO:3001216	mdtH	CARD	MFS Antibiotic Efflux Pump	MFS Efflux Pump	Determinant of Resistance to Multidrug Class	Antibiotic Efflux	ARDatabase
MF6428	gb|AAC77293_1|ARO_3001214|mdtM__Escherichia_coli	ARO:3001214	mdtM	CARD	MFS Antibiotic Efflux Pump	MFS Efflux Pump	Determinant of Resistance to Multidrug Class	Antibiotic Efflux	ARDatabase
MF6872	gb|BAE78084_1|ARO_3003548|mdtN__Escherichia_coli	ARO:3003548	mdtN	CARD	MFS Antibiotic Efflux Pump	MFS Efflux Pump	Determinant of Resistance to Multidrug Class	Antibiotic Efflux	ARDatabase
MF6871	gb|BAE78083_1|ARO_3003549|mdtO__Escherichia_coli	ARO:3003549	mdtO	CARD	MFS Antibiotic Efflux Pump	MFS Efflux Pump	Determinant of Resistance to Multidrug Class	Antibiotic Efflux	ARDatabase
MF6870	gb|BAE78082_1|ARO_3003550|mdtP__Escherichia_coli	ARO:3003550	mdtP	CARD	MFS Antibiotic Efflux Pump	MFS Efflux Pump	Determinant of Resistance to Multidrug Class	Antibiotic Efflux	ARDatabase
MF7182	DLFM13_03434|CBP10SR2_TZP_177|gene-3|-|1396-2526|complete	NF000254.1	MphA	NCBI-AMR	MphA macrolide phosphotransferase	Macrolide Phosphotransferase	Determinant of MLS Resistance	Antibiotic Inactivation	FxnlSlxns
MF7408	gb|AAG57600_1|ARO_3000318|mphB__Escherichia_coli	ARO:3000318	mphB	CARD	MphB macrolide phosphotransferase	Macrolide Phosphotransferase	Determinant of MLS Resistance	Antibiotic Inactivation	ARDatabase
MF6873	gb|BAE78116_1|ARO_3003576|eptA__Escherichia_coli	ARO:3003576	eptA	CARD	Pmr phosphoethanolamine transferase	Phosphoethanolamine Transferase	Determinant of Polymyxin Resistance	Antibiotic Target Alteration	ARDatabase
MF6420	gb|AAC75314_1|ARO_3003578|pmrF__Escherichia_coli	ARO:3003578	PmrF	CARD	Pmr phosphoethanolamine transferase	Phosphoethanolamine Transferase	Determinant of Polymyxin Resistance	Antibiotic Target Alteration	ARDatabase
MF6416	gb|AAC75089_1|ARO_3003577|ugd__Escherichia_coli	ARO:3003577	ugd	CARD	Pmr phosphoethanolamine transferase	Phosphoethanolamine Transferase	Determinant of Polymyxin Resistance	Antibiotic Target Alteration	ARDatabase
MF7374	gb|AAC73564_1|ARO_3000216|acrB__Escherichia_coli	ARO:3000216	acrB	CARD	RND Antibiotic Efflux Pump	RND Efflux Pump	Efflux Pump Complex or Subunit Conferring Antibiotic Resistance	Antibiotic Efflux	ARDatabase
MF7445	gb|BAA16344_1|ARO_3000491|acrD__Escherichia_coli	ARO:3000491	acrD	CARD	RND Antibiotic Efflux Pump	RND Efflux Pump	Efflux Pump Complex or Subunit Conferring Antibiotic Resistance	Antibiotic Efflux	ARDatabase
MF6425	gb|AAC76297_1|ARO_3000499|acrE__Escherichia_coli	ARO:3000499	AcrE	CARD	RND Antibiotic Efflux Pump	RND Efflux Pump	Determinant of Resistance to Multidrug Class	Antibiotic Efflux	ARDatabase
MF6426	gb|AAC76298_1|ARO_3000502|acrF__Escherichia_coli	ARO:3000502	AcrF	CARD	RND Antibiotic Efflux Pump	RND Efflux Pump	Determinant of Resistance to Multidrug Class	Antibiotic Efflux	ARDatabase
MF7375	gb|AAC73565_1|ARO_3004043|Escherichia_coli_acrA	ARO:3004043	Escherichia coli acrA	CARD	RND Antibiotic Efflux Pump	RND Efflux Pump	Determinant of Resistance to Multidrug Class	Antibiotic Efflux	ARDatabase
MF6417	gb|AAC75135_2|ARO_3000792|mdtA__Escherichia_coli	ARO:3000792	mdtA	CARD	RND Antibiotic Efflux Pump	RND Efflux Pump	Determinant of Resistance to Multidrug Class	Antibiotic Efflux	ARDatabase
MF6418	gb|AAC75136_1|ARO_3000793|mdtB__Escherichia_coli	ARO:3000793	mdtB	CARD	RND Antibiotic Efflux Pump	RND Efflux Pump	Determinant of Resistance to Multidrug Class	Antibiotic Efflux	ARDatabase
MF6419	gb|AAC75137_1|ARO_3000794|mdtC__Escherichia_coli	ARO:3000794	mdtC	CARD	RND Antibiotic Efflux Pump	RND Efflux Pump	Determinant of Resistance to Multidrug Class	Antibiotic Efflux	ARDatabase
MF6868	gb|BAE77781_1|ARO_3000795|mdtE__Escherichia_coli	ARO:3000795	mdtE	CARD	RND Antibiotic Efflux Pump	RND Efflux Pump	Determinant of Resistance to Multidrug Class	Antibiotic Efflux	ARDatabase
MF6427	gb|AAC76539_1|ARO_3000796|mdtF__Escherichia_coli	ARO:3000796	mdtF	CARD	RND Antibiotic Efflux Pump	RND Efflux Pump	Determinant of Resistance to Multidrug Class	Antibiotic Efflux	ARDatabase
MF6663	gb|ACN32294_1|ARO_3000237|tolC__Escherichia_coli_	ARO:3000237	TolC	CARD	RND Antibiotic Efflux Pump	RND Efflux Pump	Determinant of Resistance to Multidrug Class	Antibiotic Efflux	ARDatabase
MF7642	1028098403|WP_063854934_1|U01945_1|1|1|sat4|sat4|acetyltransferase|streptothricin_N-acetyltransferase_Sat4	WP_063854934_1	sat4	NCBI-AMR	SAT-4_Streptothricin Acetyltransferase	Streptothricin Acetyltransferase	Determinant of Resistance to Nucleoside Antibiotics	Antibiotic Inactivation	ARDatabase
MF6939	gb|CAA77936_1|ARO_3004039|Escherichia_coli_emrE	ARO:3004039	Escherichia coli emrE	CARD	SMR Antibiotic Efflux Pump	SMR Efflux Pump	Determinant of Resistance to Multidrug Class	Antibiotic Efflux	ARDatabase
MF0500	518557037|WP_019727244_1|DQ914960_2|1|1|sul1|sul1|insensitivity|sulfonamide-resistant_dihydropteroate_synthase_Sul1	WP_019727244.1	sul1	NCBI-AMR	Sulfonamide Resistant Dihydropteroate Synthase (sul)	Sulfonamide dihydropteroate synthase	Determinant of Sulfonamide Resistance	Antibiotic Target Replacement	ARDatabase
MF7196	DLFM13_04515|CBP15SR2_CHL_16|gene-1|+|231-1673|complete	NF000531.2	blaTEM	NCBI-AMR	TEM beta-lactamase (Class A)	Class A Beta-lactamase	Determinant of Beta-lactam Resistance	Antibiotic Inactivation	FxnlSlxns
MF7481	DLFM13_05754|CBP19SR2_CHL_5|gene-5|+|2008-3231|complete	ARO:3000165	tet(A)	CARD	Tetracycline ABC Transporter	ABC Transporter	Determinant of Tetracycline Resistance	Antibiotic Efflux	FxnlSlxns
MF7418	gb|AAN06707_1|ARO_3000165|tet(A)__Shigella_sonnei_	ARO:3000165	tet(A)	CARD	Tetracycline ABC Transporter	ABC Transporter	Determinant of Tetracycline Resistance	Antibiotic Efflux	ARDatabase
MF8271	DLFM02_02210|F11_TET_3|gene-3|+|2650-3888|complete	ARO:3000567	tet(40)	CARD	Tetracycline MFS Antibiotic Efflux Pump	MFS Efflux Pump	Determinant of Tetracycline Resistance	Antibiotic Efflux	FxnlSlxns
MF0522	690046024|WP_031942321_1|EF682136_1|1|1|tet(A)|tet(A)|efflux|tetracycline_efflux_MFS_transporter_Tet(A)	WP_031942321.1	tet(A)	NCBI-AMR	Tetracycline MFS Antibiotic Efflux Pump	MFS Efflux Pump	Determinant of Tetracycline Resistance	Antibiotic Efflux	ARDatabase
MF7296	DLFM13_05643|CBP18SR2_TGC_18|gene-5|-|2877-3671|complete	RF0134	tet_MFS_efflux	Resfam	Tetracycline Resistance MFS Efflux Pump	MFS Efflux Pump	Determinant of Tetracycline Resistance	Antibiotic Efflux	FxnlSlxns
MF7194	DLFM13_04431|CBP14SR2_TGC_9|gene-3|+|2369-4018|complete	NF012153.1	tet_protect	NCBI-AMR	Tetracycline Resistance MFS Efflux Pump	MFS Efflux Pump	Determinant of Tetracycline Resistance	Antibiotic Efflux	FxnlSlxns
MF8119	DLFM14_00708|H5_TET_19|gene-2|-|140-2089|complete	EF626943	tet(32)	Resfinder	Tetracycline Resistance Ribosomal Protection Protein	Tetracycline ribosomal protection protein	Determinant of Tetracycline Resistance	Antibiotic Target Protection	FxnlSlxns
MF8022	505385954|WP_015573056_1|AJ295238_3|1|1|tet(32)|tet(32)|target_protection|tetracycline_resistance_ribosomal_protection_protein_Tet(32)	WP_015573056_1	tet(32)	NCBI-AMR	Tetracycline Resistance Ribosomal Protection Protein	Tetracycline ribosomal protection protein	Determinant of Tetracycline Resistance	Antibiotic Target Protection	ARDatabase
MF7646	1028099438|WP_063855884_1|FN594949_1|1|1|tet(44)|tet(44)|target_protection|tetracycline_resistance_ribosomal_protection_protein_Tet(44)	WP_063855884_1	tet(44)	NCBI-AMR	Tetracycline Resistance Ribosomal Protection Protein	Tetracycline ribosomal protection protein	Determinant of Tetracycline Resistance	Antibiotic Target Protection	ARDatabase
MF0089	1028099835|WP_063856107_1|X56353_1|1|1|tet(M)|tet(M)|target_protection|tetracycline_resistance_ribosomal_protection_protein_Tet(M)	WP_063856107.1	tet(M)	NCBI-AMR	Tetracycline Resistance Ribosomal Protection Protein	Tetracycline ribosomal protection protein	Determinant of Tetracycline Resistance	Antibiotic Target Protection	ARDatabase
MF7652	1028100171|WP_063856394_1|DQ206711_1|1|1|tet(M)|tet(M)|target_protection|tetracycline_resistance_ribosomal_protection_protein_Tet(M)	WP_063856394_1	tet(M)	NCBI-AMR	Tetracycline Resistance Ribosomal Protection Protein	Tetracycline ribosomal protection protein	Determinant of Tetracycline Resistance	Antibiotic Target Protection	ARDatabase
MF0456	499845527|WP_011526261_1|AM180252_1|1|1|tet(W)|tet(W)|target_protection|tetracycline_resistance_ribosomal_protection_protein_Tet(W)	WP_011526261.1	tet(W)	NCBI-AMR	Tetracycline Resistance Ribosomal Protection Protein	Tetracycline ribosomal protection protein	Determinant of Tetracycline Resistance	Antibiotic Target Protection	ARDatabase
MF0092	1028100284|WP_063856419_1|DQ525023_1|1|1|tet(W)|tet(W)|target_protection|tetracycline_resistance_ribosomal_protection_protein_Tet(W)	WP_063856419.1	tet(W)	NCBI-AMR	Tetracycline Resistance Ribosomal Protection Protein	Tetracycline ribosomal protection protein	Determinant of Tetracycline Resistance	Antibiotic Target Protection	ARDatabase
MF0093	1028100286|WP_063856421_1|EF065524_1|1|1|tet(W)|tet(W)|target_protection|tetracycline_resistance_ribosomal_protection_protein_Tet(W)	WP_063856421.1	tet(W)	NCBI-AMR	Tetracycline Resistance Ribosomal Protection Protein	Tetracycline ribosomal protection protein	Determinant of Tetracycline Resistance	Antibiotic Target Protection	ARDatabase
MF6799	gb|AMP42147_1|ARO_3004442|tet(W_N_W)__uncultured_bacterium	ARO:3004442	tet(W/N/W)	CARD	Tetracycline Resistance Ribosomal Protection Protein	Tetracycline ribosomal protection protein	Determinant of Tetracycline Resistance	Antibiotic Target Protection	ARDatabase
MF7193	DLFM13_04350|CBP14SR2_TET_54|gene-2|+|1020-2945|complete	NF012154.0	tet_protect_Q	NCBI-AMR	Tetracycline Resistance Ribosomal Protection Protein	Tetracycline ribosomal protection protein	Determinant of Tetracycline Resistance	Antibiotic Target Protection	FxnlSlxns
MF8319	DLFM04_03203|AmoxConc-TwinB-Time3_TET_7|gene-3|+|1047-2966|complete	NF033148.1	TetM-TetW-TetO-TetS	NCBI-AMR	Tetracycline Resistance Ribosomal Protection Protein	Tetracycline ribosomal protection protein	Determinant of Tetracycline Resistance	Antibiotic Target Protection	FxnlSlxns
MF8320	DLFM04_03433|AmoxConc-TwinA-Time2_TET_11|gene-1|-|245-2164|complete	NF033148.1	TetM-TetW-TetO-TetS	NCBI-AMR	Tetracycline Resistance Ribosomal Protection Protein	Tetracycline ribosomal protection protein	Determinant of Tetracycline Resistance	Antibiotic Target Protection	FxnlSlxns
MF8345	DLFM07_04637|08X-000_TET_9|gene-2|+|640-2559|complete	NF033148.1	TetM-TetW-TetO-TetS	NCBI-AMR	Tetracycline Resistance Ribosomal Protection Protein	Tetracycline ribosomal protection protein	Determinant of Tetracycline Resistance	Antibiotic Target Protection	FxnlSlxns
MF1224	DLFM02_03056|F04_TET_14|gene-1|+|912-2831|complete	RF0133	TetM-TetW-TetO-TetS	Resfam	Tetracycline Resistance Ribosomal Protection Protein	Tetracycline ribosomal protection protein	Determinant of Tetracycline Resistance	Antibiotic Target Protection	FxnlSlxns
MF3362	DLFM04_00756|Control-TwinA-Time2_TET_16|gene-2|+|1400-3436|complete	RF0133	TetM-TetW-TetO-TetS	Resfam	Tetracycline Resistance Ribosomal Protection Protein	Tetracycline ribosomal protection protein	Determinant of Tetracycline Resistance	Antibiotic Target Protection	FxnlSlxns
MF3783	DLFM07_00940|03G-000_TET_22|gene-1|+|213-1565|complete	RF0133	TetM-TetW-TetO-TetS	Resfam	Tetracycline Resistance Ribosomal Protection Protein	Tetracycline ribosomal protection protein	Determinant of Tetracycline Resistance	Antibiotic Target Protection	FxnlSlxns
MF3814	DLFM07_01644|03A-000_TET_32|gene-1|+|208-2127|complete	RF0133	TetM-TetW-TetO-TetS	Resfam	Tetracycline Resistance Ribosomal Protection Protein	Tetracycline ribosomal protection protein	Determinant of Tetracycline Resistance	Antibiotic Target Protection	FxnlSlxns
MF3849	DLFM07_02164|01G-000-2_TET_2|gene-3|+|1711-3630|complete	RF0133	TetM-TetW-TetO-TetS	Resfam	Tetracycline Resistance Ribosomal Protection Protein	Tetracycline ribosomal protection protein	Determinant of Tetracycline Resistance	Antibiotic Target Protection	FxnlSlxns
MF4600	DLFM11_03198|P17SR3_DCS_9|gene-2|-|521-2014|complete	RF0133	TetM-TetW-TetO-TetS	Resfam	Tetracycline Resistance Ribosomal Protection Protein	Tetracycline ribosomal protection protein	Determinant of Tetracycline Resistance	Antibiotic Target Protection	FxnlSlxns
MF4736	DLFM11_05987|P17SR5_TET_9|gene-1|-|28-1947|complete	RF0133	TetM-TetW-TetO-TetS	Resfam	Tetracycline Resistance Ribosomal Protection Protein	Tetracycline ribosomal protection protein	Determinant of Tetracycline Resistance	Antibiotic Target Protection	FxnlSlxns
MF7478	DLFM13_03764|CBP12SR2_TET_56|gene-1|+|424-2346|complete	ARO:3000190	tetO	CARD	Tetracycline Resistance Ribosomal Protection Protein	Tetracycline ribosomal protection protein	Determinant of Tetracycline Resistance	Antibiotic Target Protection	FxnlSlxns
MF7458	gb|CAA79727_1|ARO_3000191|tetQ__Bacteroides_fragilis_	ARO:3000191	tetQ	CARD	Tetracycline Resistance Ribosomal Protection Protein	Tetracycline ribosomal protection protein	Determinant of Tetracycline Resistance	Antibiotic Target Protection	ARDatabase
MF7213	DLFM07_03979|0401-3a_TET_31|gene-1|-|105-1271|complete	RF0136	tet(X)	Resfam	TetX	Tetracycline Inactivation Enzyme	Determinant of Tetracycline Resistance	Antibiotic Inactivation	FxnlSlxns
MF7655	1028100301|WP_063856436_1|M37699_1|1|1|tet(X)|tet(X)|hydroxylation|tetracycline-inactivating_monooxygenase_Tet(X)	WP_063856436_1	tet(X)	NCBI-AMR	TetX	Tetracycline Inactivation Enzyme	Determinant of Tetracycline Resistance	Antibiotic Inactivation	ARDatabase
MF7678	1028100594|WP_063856729_1|KF478993_1|1|1|vanR-O|vanR-O|re-structuring_of_the_cell_wall|VanO-type_vancomycin_resistance_DNA-binding_response_regulator_VanR	WP_063856729_1	vanR-O	NCBI-AMR	vanR glycopeptide resistance gene cluster	Glycopeptide Resistance Gene Cluster	Determinant of Glycopeptide Resistance	Antibiotic Target Alteration	ARDatabase
MF7926	488297487|WP_002368695_1|U35369_1|1|1|vanY-B|vanY-B|re-structuring_of_the_cell_wall|D-Ala-D-Ala_carboxypeptidase_VanY-B	WP_002368695_1	vanY-B	NCBI-AMR	vanY-B glycopeptide resistance gene cluster	Glycopeptide Resistance Gene Cluster	Determinant of Glycopeptide Resistance	Antibiotic Target Alteration	ARDatabase

## Sheet: Table S9
Table S9: Antibiotics concentrations used in functional metagenomics screening. The antibiotic selections were performed in Mueller-Hinton agar with 50 µg/ml kanamycin.
Antibiotics concentrations used in functional metagenomics screening. The antibiotic selections were performed in Mueller-Hinton agar with 50 µg/ml kanamycin.
Antibiotic name	Abbreviation	Min. Inhibitory Conc. (MIC, ug/ml)	Antibiotic Class
ceftazidime	CAZ	16	Beta-lactam
chloramphenicol	CHL	8	Amphenicol
ciprofloxacin	CIP	0.5	Quinolone
colistin	CST	4	Polymixin
cefotaxime	CTX	8	Beta-lactam
cefepime	FEP	8	Beta-lactam
cefoxitin	FOX	64	Beta-lactam
gentamicin	GEN	16	Aminoglycoside
meropenem	MEM	2	Beta-lactam
nitrofurantoin	NIT	32	Nitrofuran
piperacillin	PIP	16	Beta-lactam
trimethoprim-sulfamethoxazole	SXT	2-TR/38-SX	Folate Synthesis Inhibitor
tetracycline	TET	8	Tetracycline
tigecycline	TGC	2	Tetracycline
piperacillin-tazobactam	TZP	16-PI/4-TZ	Beta-lactam
