# Supplementary material for: Destination shapes antibiotic resistance gene acquisitions, abundance increases, and diversity changes in Dutch travelers
Source: Genome Med. 2021 Jun 7;13:79. doi: 10.1186/s13073-021-00893-z (PMC8182900; doi:10.1186/s13073-021-00893-z)
Supplement: Supplementary file 3 — Additional file 3: Source data for all figure panels. [file 13073_2021_893_MOESM3_ESM.xlsx]

## Sheet: 2A & 4A
Sample_id	Subject_id	Timepoint	Travel_destination_subregion	RPKM
S008_T0	S008	Pre-travel	Northern Africa	2214.54
S009_T0	S009	Pre-travel	Northern Africa	370.487
S014_T0	S014	Pre-travel	Northern Africa	2573.09
S016_T0	S016	Pre-travel	Northern Africa	568.335
S019_T0	S019	Pre-travel	Northern Africa	1438.25
S021_T0	S021	Pre-travel	Northern Africa	3564.67
S022_T0	S022	Pre-travel	Northern Africa	4142.98
S039_T0	S039	Pre-travel	Northern Africa	993.163
S040_T0	S040	Pre-travel	Northern Africa	1185.59
S048_T0	S048	Pre-travel	Northern Africa	505.192
S049_T0	S049	Pre-travel	Northern Africa	3630.51
S053_T0	S053	Pre-travel	Northern Africa	4914.53
S054_T0	S054	Pre-travel	Northern Africa	1375.64
S074_T0	S074	Pre-travel	Northern Africa	2079.38
S075_T0	S075	Pre-travel	Northern Africa	7672.71
S082_T0	S082	Pre-travel	Northern Africa	2011.46
S083_T0	S083	Pre-travel	Northern Africa	1139.94
S086_T0	S086	Pre-travel	Northern Africa	1328.64
S092_T0	S092	Pre-travel	Northern Africa	4717.85
S093_T0	S093	Pre-travel	Northern Africa	5295.59
S094_T0	S094	Pre-travel	Northern Africa	1753.68
S095_T0	S095	Pre-travel	Northern Africa	1467.98
S103_T0	S103	Pre-travel	Northern Africa	524.878
S104_T0	S104	Pre-travel	Northern Africa	1022.21
S111_T0	S111	Pre-travel	Northern Africa	963.114
S112_T0	S112	Pre-travel	Northern Africa	3107.32
S128_T0	S128	Pre-travel	Northern Africa	6761.24
S131_T0	S131	Pre-travel	Northern Africa	1412.13
S132_T0	S132	Pre-travel	Northern Africa	737.787
S145_T0	S145	Pre-travel	Northern Africa	1536.31
S146_T0	S146	Pre-travel	Northern Africa	2314.2
S148_T0	S148	Pre-travel	Northern Africa	6639.61
S150_T0	S150	Pre-travel	Northern Africa	9792.71
S161_T0	S161	Pre-travel	Northern Africa	2514.37
S162_T0	S162	Pre-travel	Northern Africa	2788.01
S163_T0	S163	Pre-travel	Northern Africa	1641.45
S172_T0	S172	Pre-travel	Northern Africa	2038.4
S175_T0	S175	Pre-travel	Northern Africa	1398.97
S176_T0	S176	Pre-travel	Northern Africa	3813.01
S182_T0	S182	Pre-travel	Northern Africa	1191.98
S184_T0	S184	Pre-travel	Northern Africa	571.662
S188_T0	S188	Pre-travel	Northern Africa	7244.42
S189_T0	S189	Pre-travel	Northern Africa	988.753
S008_T1	S008	Post-travel	Northern Africa	2245.22
S009_T1	S009	Post-travel	Northern Africa	707.909
S014_T1	S014	Post-travel	Northern Africa	4333.65
S016_T1	S016	Post-travel	Northern Africa	2249.63
S019_T1	S019	Post-travel	Northern Africa	1177.3
S021_T1	S021	Post-travel	Northern Africa	3372.09
S022_T1	S022	Post-travel	Northern Africa	8349.8
S039_T1	S039	Post-travel	Northern Africa	5636.63
S040_T1	S040	Post-travel	Northern Africa	2786.23
S048_T1	S048	Post-travel	Northern Africa	5399.35
S049_T1	S049	Post-travel	Northern Africa	2107.62
S053_T1	S053	Post-travel	Northern Africa	2874.21
S054_T1	S054	Post-travel	Northern Africa	2682.76
S074_T1	S074	Post-travel	Northern Africa	1137.61
S075_T1	S075	Post-travel	Northern Africa	1455.17
S082_T1	S082	Post-travel	Northern Africa	2210.19
S083_T1	S083	Post-travel	Northern Africa	1171.07
S086_T1	S086	Post-travel	Northern Africa	1088.97
S092_T1	S092	Post-travel	Northern Africa	5521.13
S093_T1	S093	Post-travel	Northern Africa	2655.96
S094_T1	S094	Post-travel	Northern Africa	2112.04
S095_T1	S095	Post-travel	Northern Africa	2552.41
S103_T1	S103	Post-travel	Northern Africa	8352.45
S104_T1	S104	Post-travel	Northern Africa	3857.67
S111_T1	S111	Post-travel	Northern Africa	2417.86
S112_T1	S112	Post-travel	Northern Africa	1832.09
S128_T1	S128	Post-travel	Northern Africa	3963.19
S131_T1	S131	Post-travel	Northern Africa	4522.28
S132_T1	S132	Post-travel	Northern Africa	823.839
S145_T1	S145	Post-travel	Northern Africa	3632.05
S146_T1	S146	Post-travel	Northern Africa	1911.22
S148_T1	S148	Post-travel	Northern Africa	5393.58
S150_T1	S150	Post-travel	Northern Africa	3608.23
S161_T1	S161	Post-travel	Northern Africa	3286.27
S162_T1	S162	Post-travel	Northern Africa	1076.25
S163_T1	S163	Post-travel	Northern Africa	447.895
S172_T1	S172	Post-travel	Northern Africa	5469.45
S175_T1	S175	Post-travel	Northern Africa	2647.35
S176_T1	S176	Post-travel	Northern Africa	5120.24
S182_T1	S182	Post-travel	Northern Africa	5905.29
S184_T1	S184	Post-travel	Northern Africa	2004.29
S188_T1	S188	Post-travel	Northern Africa	2008.59
S189_T1	S189	Post-travel	Northern Africa	684.607
S010_T0	S010	Pre-travel	Eastern Africa	773.811
S012_T0	S012	Pre-travel	Eastern Africa	7956.12
S013_T0	S013	Pre-travel	Eastern Africa	727.582
S018_T0	S018	Pre-travel	Eastern Africa	989.182
S027_T0	S027	Pre-travel	Eastern Africa	598.109
S029_T0	S029	Pre-travel	Eastern Africa	6374.3
S035_T0	S035	Pre-travel	Eastern Africa	1376.04
S042_T0	S042	Pre-travel	Eastern Africa	2577.64
S055_T0	S055	Pre-travel	Eastern Africa	2573.56
S060_T0	S060	Pre-travel	Eastern Africa	467.723
S062_T0	S062	Pre-travel	Eastern Africa	691.595
S065_T0	S065	Pre-travel	Eastern Africa	2581.02
S066_T0	S066	Pre-travel	Eastern Africa	1574.73
S067_T0	S067	Pre-travel	Eastern Africa	673.09
S068_T0	S068	Pre-travel	Eastern Africa	5666.4
S072_T0	S072	Pre-travel	Eastern Africa	780.2
S073_T0	S073	Pre-travel	Eastern Africa	253.195
S077_T0	S077	Pre-travel	Eastern Africa	590.687
S078_T0	S078	Pre-travel	Eastern Africa	562.268
S087_T0	S087	Pre-travel	Eastern Africa	4344.82
S088_T0	S088	Pre-travel	Eastern Africa	8261.38
S089_T0	S089	Pre-travel	Eastern Africa	2294.31
S090_T0	S090	Pre-travel	Eastern Africa	4850.58
S091_T0	S091	Pre-travel	Eastern Africa	3481.68
S096_T0	S096	Pre-travel	Eastern Africa	4097.49
S097_T0	S097	Pre-travel	Eastern Africa	1107.22
S098_T0	S098	Pre-travel	Eastern Africa	872.052
S105_T0	S105	Pre-travel	Eastern Africa	4336.13
S113_T0	S113	Pre-travel	Eastern Africa	658.247
S114_T0	S114	Pre-travel	Eastern Africa	13392.3
S121_T0	S121	Pre-travel	Eastern Africa	1803.52
S123_T0	S123	Pre-travel	Eastern Africa	2077.33
S129_T0	S129	Pre-travel	Eastern Africa	2990.89
S141_T0	S141	Pre-travel	Eastern Africa	537.051
S142_T0	S142	Pre-travel	Eastern Africa	3118.27
S143_T0	S143	Pre-travel	Eastern Africa	4219.8
S144_T0	S144	Pre-travel	Eastern Africa	6951.71
S149_T0	S149	Pre-travel	Eastern Africa	6300.83
S152_T0	S152	Pre-travel	Eastern Africa	1029.86
S153_T0	S153	Pre-travel	Eastern Africa	5723.58
S167_T0	S167	Pre-travel	Eastern Africa	1568.78
S178_T0	S178	Pre-travel	Eastern Africa	3705.31
S187_T0	S187	Pre-travel	Eastern Africa	6286.15
S190_T0	S190	Pre-travel	Eastern Africa	2268.29
S010_T1	S010	Post-travel	Eastern Africa	433.607
S012_T1	S012	Post-travel	Eastern Africa	9020.31
S013_T1	S013	Post-travel	Eastern Africa	1126.83
S018_T1	S018	Post-travel	Eastern Africa	878.16
S027_T1	S027	Post-travel	Eastern Africa	1460.58
S029_T1	S029	Post-travel	Eastern Africa	2432.18
S035_T1	S035	Post-travel	Eastern Africa	1523.25
S042_T1	S042	Post-travel	Eastern Africa	9682.05
S055_T1	S055	Post-travel	Eastern Africa	3092.88
S060_T1	S060	Post-travel	Eastern Africa	1790.92
S062_T1	S062	Post-travel	Eastern Africa	4614.27
S065_T1	S065	Post-travel	Eastern Africa	7905.5
S066_T1	S066	Post-travel	Eastern Africa	5632.24
S067_T1	S067	Post-travel	Eastern Africa	2179.18
S068_T1	S068	Post-travel	Eastern Africa	4544.37
S072_T1	S072	Post-travel	Eastern Africa	3091.89
S073_T1	S073	Post-travel	Eastern Africa	1642.51
S077_T1	S077	Post-travel	Eastern Africa	2021.76
S078_T1	S078	Post-travel	Eastern Africa	1846.2
S087_T1	S087	Post-travel	Eastern Africa	2638.27
S088_T1	S088	Post-travel	Eastern Africa	17091.1
S089_T1	S089	Post-travel	Eastern Africa	3544.89
S090_T1	S090	Post-travel	Eastern Africa	3058.8
S091_T1	S091	Post-travel	Eastern Africa	695.077
S096_T1	S096	Post-travel	Eastern Africa	1744.77
S097_T1	S097	Post-travel	Eastern Africa	4020.8
S098_T1	S098	Post-travel	Eastern Africa	9959.04
S105_T1	S105	Post-travel	Eastern Africa	2831.79
S113_T1	S113	Post-travel	Eastern Africa	1130.23
S114_T1	S114	Post-travel	Eastern Africa	9325.65
S121_T1	S121	Post-travel	Eastern Africa	4618.01
S123_T1	S123	Post-travel	Eastern Africa	1310.06
S129_T1	S129	Post-travel	Eastern Africa	1344.49
S141_T1	S141	Post-travel	Eastern Africa	8066.14
S142_T1	S142	Post-travel	Eastern Africa	5226.32
S143_T1	S143	Post-travel	Eastern Africa	6962.75
S144_T1	S144	Post-travel	Eastern Africa	4051.05
S149_T1	S149	Post-travel	Eastern Africa	5328.3
S152_T1	S152	Post-travel	Eastern Africa	4982.37
S153_T1	S153	Post-travel	Eastern Africa	4226.03
S167_T1	S167	Post-travel	Eastern Africa	1741.5
S178_T1	S178	Post-travel	Eastern Africa	1302.57
S187_T1	S187	Post-travel	Eastern Africa	5074.33
S190_T1	S190	Post-travel	Eastern Africa	9312.83
S002_T0	S002	Pre-travel	Southern Asia	670.926
S005_T0	S005	Pre-travel	Southern Asia	3337
S006_T0	S006	Pre-travel	Southern Asia	673.133
S007_T0	S007	Pre-travel	Southern Asia	896.096
S015_T0	S015	Pre-travel	Southern Asia	888.642
S017_T0	S017	Pre-travel	Southern Asia	3390.41
S023_T0	S023	Pre-travel	Southern Asia	2409.68
S024_T0	S024	Pre-travel	Southern Asia	212.469
S025_T0	S025	Pre-travel	Southern Asia	5456.19
S031_T0	S031	Pre-travel	Southern Asia	7678.71
S033_T0	S033	Pre-travel	Southern Asia	838.743
S034_T0	S034	Pre-travel	Southern Asia	1222.91
S041_T0	S041	Pre-travel	Southern Asia	3443.97
S045_T0	S045	Pre-travel	Southern Asia	492.706
S046_T0	S046	Pre-travel	Southern Asia	1105.85
S047_T0	S047	Pre-travel	Southern Asia	526.737
S050_T0	S050	Pre-travel	Southern Asia	1468.81
S051_T0	S051	Pre-travel	Southern Asia	1132.01
S056_T0	S056	Pre-travel	Southern Asia	2562.29
S057_T0	S057	Pre-travel	Southern Asia	592.298
S058_T0	S058	Pre-travel	Southern Asia	2459.05
S069_T0	S069	Pre-travel	Southern Asia	1163.61
S070_T0	S070	Pre-travel	Southern Asia	4442.82
S079_T0	S079	Pre-travel	Southern Asia	2094.79
S085_T0	S085	Pre-travel	Southern Asia	747.74
S099_T0	S099	Pre-travel	Southern Asia	11187.7
S100_T0	S100	Pre-travel	Southern Asia	4562.18
S107_T0	S107	Pre-travel	Southern Asia	1512.4
S108_T0	S108	Pre-travel	Southern Asia	3023.57
S109_T0	S109	Pre-travel	Southern Asia	1476
S118_T0	S118	Pre-travel	Southern Asia	3065.57
S120_T0	S120	Pre-travel	Southern Asia	3179.53
S125_T0	S125	Pre-travel	Southern Asia	5230.19
S135_T0	S135	Pre-travel	Southern Asia	765.99
S136_T0	S136	Pre-travel	Southern Asia	3675.41
S137_T0	S137	Pre-travel	Southern Asia	8833.44
S138_T0	S138	Pre-travel	Southern Asia	3362
S147_T0	S147	Pre-travel	Southern Asia	1876.09
S151_T0	S151	Pre-travel	Southern Asia	2715.28
S154_T0	S154	Pre-travel	Southern Asia	1628.92
S155_T0	S155	Pre-travel	Southern Asia	2029.83
S158_T0	S158	Pre-travel	Southern Asia	2122.08
S159_T0	S159	Pre-travel	Southern Asia	3060.4
S165_T0	S165	Pre-travel	Southern Asia	3167.94
S166_T0	S166	Pre-travel	Southern Asia	1223.86
S168_T0	S168	Pre-travel	Southern Asia	4131.16
S169_T0	S169	Pre-travel	Southern Asia	5062.03
S180_T0	S180	Pre-travel	Southern Asia	655.042
S181_T0	S181	Pre-travel	Southern Asia	1658.64
S183_T0	S183	Pre-travel	Southern Asia	970.644
S186_T0	S186	Pre-travel	Southern Asia	1934.92
S002_T1	S002	Post-travel	Southern Asia	999.398
S005_T1	S005	Post-travel	Southern Asia	1955.49
S006_T1	S006	Post-travel	Southern Asia	1782.7
S007_T1	S007	Post-travel	Southern Asia	1864.25
S015_T1	S015	Post-travel	Southern Asia	6891.95
S017_T1	S017	Post-travel	Southern Asia	9809.89
S023_T1	S023	Post-travel	Southern Asia	6777.26
S024_T1	S024	Post-travel	Southern Asia	544.715
S025_T1	S025	Post-travel	Southern Asia	4257.73
S031_T1	S031	Post-travel	Southern Asia	3248.33
S033_T1	S033	Post-travel	Southern Asia	1728.32
S034_T1	S034	Post-travel	Southern Asia	895.301
S041_T1	S041	Post-travel	Southern Asia	4597.45
S045_T1	S045	Post-travel	Southern Asia	2136.33
S046_T1	S046	Post-travel	Southern Asia	1189.79
S047_T1	S047	Post-travel	Southern Asia	5787.23
S050_T1	S050	Post-travel	Southern Asia	2988.77
S051_T1	S051	Post-travel	Southern Asia	1112.76
S056_T1	S056	Post-travel	Southern Asia	2943.82
S057_T1	S057	Post-travel	Southern Asia	1221.31
S058_T1	S058	Post-travel	Southern Asia	2238.72
S069_T1	S069	Post-travel	Southern Asia	1277.72
S070_T1	S070	Post-travel	Southern Asia	9962.19
S079_T1	S079	Post-travel	Southern Asia	795.79
S085_T1	S085	Post-travel	Southern Asia	3000.24
S099_T1	S099	Post-travel	Southern Asia	6806.32
S100_T1	S100	Post-travel	Southern Asia	8992.2
S107_T1	S107	Post-travel	Southern Asia	1466.7
S108_T1	S108	Post-travel	Southern Asia	6494.1
S109_T1	S109	Post-travel	Southern Asia	3206.69
S118_T1	S118	Post-travel	Southern Asia	5079.99
S120_T1	S120	Post-travel	Southern Asia	3634.01
S125_T1	S125	Post-travel	Southern Asia	2850.1
S135_T1	S135	Post-travel	Southern Asia	1210.14
S136_T1	S136	Post-travel	Southern Asia	1866.89
S137_T1	S137	Post-travel	Southern Asia	6888.44
S138_T1	S138	Post-travel	Southern Asia	4947.02
S147_T1	S147	Post-travel	Southern Asia	4462.55
S151_T1	S151	Post-travel	Southern Asia	2985.39
S154_T1	S154	Post-travel	Southern Asia	2230.31
S155_T1	S155	Post-travel	Southern Asia	6238.57
S158_T1	S158	Post-travel	Southern Asia	3665.1
S159_T1	S159	Post-travel	Southern Asia	5215.01
S165_T1	S165	Post-travel	Southern Asia	2889.37
S166_T1	S166	Post-travel	Southern Asia	1537.23
S168_T1	S168	Post-travel	Southern Asia	1809.39
S169_T1	S169	Post-travel	Southern Asia	2782.7
S180_T1	S180	Post-travel	Southern Asia	720.079
S181_T1	S181	Post-travel	Southern Asia	810.568
S183_T1	S183	Post-travel	Southern Asia	5752.47
S186_T1	S186	Post-travel	Southern Asia	2883.79
S001_T0	S001	Pre-travel	Southeastern Asia	929.294
S003_T0	S003	Pre-travel	Southeastern Asia	942.857
S004_T0	S004	Pre-travel	Southeastern Asia	547.399
S011_T0	S011	Pre-travel	Southeastern Asia	2173.09
S020_T0	S020	Pre-travel	Southeastern Asia	1158.99
S026_T0	S026	Pre-travel	Southeastern Asia	2111.91
S028_T0	S028	Pre-travel	Southeastern Asia	2605.02
S030_T0	S030	Pre-travel	Southeastern Asia	6682.95
S032_T0	S032	Pre-travel	Southeastern Asia	2469.49
S036_T0	S036	Pre-travel	Southeastern Asia	6643.74
S037_T0	S037	Pre-travel	Southeastern Asia	1753.81
S038_T0	S038	Pre-travel	Southeastern Asia	1110.99
S043_T0	S043	Pre-travel	Southeastern Asia	1266.23
S044_T0	S044	Pre-travel	Southeastern Asia	5225.47
S052_T0	S052	Pre-travel	Southeastern Asia	4762.55
S059_T0	S059	Pre-travel	Southeastern Asia	1719.22
S061_T0	S061	Pre-travel	Southeastern Asia	1336.13
S063_T0	S063	Pre-travel	Southeastern Asia	9025.54
S064_T0	S064	Pre-travel	Southeastern Asia	11886.1
S071_T0	S071	Pre-travel	Southeastern Asia	2106.9
S076_T0	S076	Pre-travel	Southeastern Asia	1197.41
S080_T0	S080	Pre-travel	Southeastern Asia	984.681
S081_T0	S081	Pre-travel	Southeastern Asia	1066
S084_T0	S084	Pre-travel	Southeastern Asia	503.822
S101_T0	S101	Pre-travel	Southeastern Asia	6475.21
S102_T0	S102	Pre-travel	Southeastern Asia	3765.19
S106_T0	S106	Pre-travel	Southeastern Asia	2802.83
S110_T0	S110	Pre-travel	Southeastern Asia	5148.33
S115_T0	S115	Pre-travel	Southeastern Asia	788.887
S116_T0	S116	Pre-travel	Southeastern Asia	1422.94
S117_T0	S117	Pre-travel	Southeastern Asia	10073.9
S119_T0	S119	Pre-travel	Southeastern Asia	1401.08
S122_T0	S122	Pre-travel	Southeastern Asia	5261.62
S124_T0	S124	Pre-travel	Southeastern Asia	3466.35
S126_T0	S126	Pre-travel	Southeastern Asia	1526.38
S127_T0	S127	Pre-travel	Southeastern Asia	675.311
S130_T0	S130	Pre-travel	Southeastern Asia	5514.07
S133_T0	S133	Pre-travel	Southeastern Asia	797.721
S134_T0	S134	Pre-travel	Southeastern Asia	2340.45
S139_T0	S139	Pre-travel	Southeastern Asia	745.917
S140_T0	S140	Pre-travel	Southeastern Asia	1056.51
S156_T0	S156	Pre-travel	Southeastern Asia	6766.2
S157_T0	S157	Pre-travel	Southeastern Asia	3999.58
S160_T0	S160	Pre-travel	Southeastern Asia	3592.92
S164_T0	S164	Pre-travel	Southeastern Asia	1113.49
S170_T0	S170	Pre-travel	Southeastern Asia	238.387
S171_T0	S171	Pre-travel	Southeastern Asia	3456.61
S173_T0	S173	Pre-travel	Southeastern Asia	5249.44
S174_T0	S174	Pre-travel	Southeastern Asia	2921.33
S177_T0	S177	Pre-travel	Southeastern Asia	7300.58
S179_T0	S179	Pre-travel	Southeastern Asia	1171.86
S185_T0	S185	Pre-travel	Southeastern Asia	1725.12
S001_T1	S001	Post-travel	Southeastern Asia	8867.7
S003_T1	S003	Post-travel	Southeastern Asia	1826.07
S004_T1	S004	Post-travel	Southeastern Asia	2148.5
S011_T1	S011	Post-travel	Southeastern Asia	2670.25
S020_T1	S020	Post-travel	Southeastern Asia	10173.8
S026_T1	S026	Post-travel	Southeastern Asia	9020.79
S028_T1	S028	Post-travel	Southeastern Asia	4723.84
S030_T1	S030	Post-travel	Southeastern Asia	7605.48
S032_T1	S032	Post-travel	Southeastern Asia	3892.18
S036_T1	S036	Post-travel	Southeastern Asia	5271.98
S037_T1	S037	Post-travel	Southeastern Asia	1152.32
S038_T1	S038	Post-travel	Southeastern Asia	6850.82
S043_T1	S043	Post-travel	Southeastern Asia	3039.46
S044_T1	S044	Post-travel	Southeastern Asia	5364.27
S052_T1	S052	Post-travel	Southeastern Asia	4427.01
S059_T1	S059	Post-travel	Southeastern Asia	5076.19
S061_T1	S061	Post-travel	Southeastern Asia	10956.5
S063_T1	S063	Post-travel	Southeastern Asia	2398.68
S064_T1	S064	Post-travel	Southeastern Asia	2428.41
S071_T1	S071	Post-travel	Southeastern Asia	6205.05
S076_T1	S076	Post-travel	Southeastern Asia	2253.58
S080_T1	S080	Post-travel	Southeastern Asia	1598.76
S081_T1	S081	Post-travel	Southeastern Asia	1079.86
S084_T1	S084	Post-travel	Southeastern Asia	629.434
S101_T1	S101	Post-travel	Southeastern Asia	4733.91
S102_T1	S102	Post-travel	Southeastern Asia	2679.54
S106_T1	S106	Post-travel	Southeastern Asia	1610.83
S110_T1	S110	Post-travel	Southeastern Asia	4980.02
S115_T1	S115	Post-travel	Southeastern Asia	995.12
S116_T1	S116	Post-travel	Southeastern Asia	5961.52
S117_T1	S117	Post-travel	Southeastern Asia	3744.9
S119_T1	S119	Post-travel	Southeastern Asia	5135.31
S122_T1	S122	Post-travel	Southeastern Asia	4640.38
S124_T1	S124	Post-travel	Southeastern Asia	2174
S126_T1	S126	Post-travel	Southeastern Asia	1693.75
S127_T1	S127	Post-travel	Southeastern Asia	2820.92
S130_T1	S130	Post-travel	Southeastern Asia	4117.92
S133_T1	S133	Post-travel	Southeastern Asia	2783.92
S134_T1	S134	Post-travel	Southeastern Asia	2263.91
S139_T1	S139	Post-travel	Southeastern Asia	8087.79
S140_T1	S140	Post-travel	Southeastern Asia	8869.2
S156_T1	S156	Post-travel	Southeastern Asia	5041.47
S157_T1	S157	Post-travel	Southeastern Asia	2732.61
S160_T1	S160	Post-travel	Southeastern Asia	4805.64
S164_T1	S164	Post-travel	Southeastern Asia	1764.19
S170_T1	S170	Post-travel	Southeastern Asia	5854.36
S171_T1	S171	Post-travel	Southeastern Asia	3497.53
S173_T1	S173	Post-travel	Southeastern Asia	7626.56
S174_T1	S174	Post-travel	Southeastern Asia	4241.37
S177_T1	S177	Post-travel	Southeastern Asia	12450.9
S179_T1	S179	Post-travel	Southeastern Asia	5730.94
S185_T1	S185	Post-travel	Southeastern Asia	3088.07

## Sheet: 2A_CIs
Pre-travel	Post-travel	difference	bca_ci_low	bca_ci_high	pct_ci_low	pct_ci_high	Significant
2847.57	3834.3	986.735	547.384	1436.21	549.446	1437.05	TRUE

## Sheet: 4A_CIs
Travel_destination_subregion	Pre-travel	Post-travel	difference	fc	bca_ci_low	bca_ci_high	Significant
Northern Africa	2649.92	3088.18	438.254	1.16538	-420.971	1292.49	FALSE
Eastern Africa	3046.93	4193.31	1146.39	1.37624	231.592	2120.33	TRUE
Southern Asia	2588.6	3479.07	890.473	1.344	243.266	1548.8	TRUE
Southeastern Asia	3096.31	4495.91	1399.61	1.45203	439.957	2371.11	TRUE

## Sheet: 2B & 4B & S4B
Sample_id	Subject_id	Timepoint	Travel_destination_subregion	Richness	Shannon
S003_T0	S003	Pre-travel	Southeastern Asia	30	2.65584
S003_T1	S003	Post-travel	Southeastern Asia	76	3.85297
S005_T0	S005	Pre-travel	Southern Asia	32	1.2483
S005_T1	S005	Post-travel	Southern Asia	65	3.66102
S011_T0	S011	Pre-travel	Southeastern Asia	64	3.56004
S011_T1	S011	Post-travel	Southeastern Asia	61	3.65284
S016_T0	S016	Pre-travel	Northern Africa	35	3.0581
S016_T1	S016	Post-travel	Northern Africa	64	3.84248
S017_T0	S017	Pre-travel	Southern Asia	56	3.66601
S017_T1	S017	Post-travel	Southern Asia	72	3.79183
S018_T0	S018	Pre-travel	Eastern Africa	49	3.23935
S018_T1	S018	Post-travel	Eastern Africa	53	3.41115
S019_T0	S019	Pre-travel	Northern Africa	30	2.54297
S019_T1	S019	Post-travel	Northern Africa	35	2.94991
S025_T0	S025	Pre-travel	Southern Asia	55	3.29879
S025_T1	S025	Post-travel	Southern Asia	61	3.63294
S031_T0	S031	Pre-travel	Southern Asia	62	3.66755
S031_T1	S031	Post-travel	Southern Asia	75	3.85196
S037_T0	S037	Pre-travel	Southeastern Asia	57	3.72598
S037_T1	S037	Post-travel	Southeastern Asia	64	3.40178
S039_T0	S039	Pre-travel	Northern Africa	36	2.94922
S039_T1	S039	Post-travel	Northern Africa	62	3.62898
S040_T0	S040	Pre-travel	Northern Africa	58	3.78468
S040_T1	S040	Post-travel	Northern Africa	61	3.65322
S041_T0	S041	Pre-travel	Southern Asia	71	3.75572
S041_T1	S041	Post-travel	Southern Asia	70	3.76811
S042_T0	S042	Pre-travel	Eastern Africa	58	3.72481
S042_T1	S042	Post-travel	Eastern Africa	59	3.70203
S051_T0	S051	Pre-travel	Southern Asia	43	3.09855
S051_T1	S051	Post-travel	Southern Asia	73	3.54582
S063_T0	S063	Pre-travel	Southeastern Asia	58	3.63334
S063_T1	S063	Post-travel	Southeastern Asia	76	3.92188
S064_T0	S064	Pre-travel	Southeastern Asia	59	3.52017
S064_T1	S064	Post-travel	Southeastern Asia	65	3.73297
S066_T0	S066	Pre-travel	Eastern Africa	34	2.82222
S066_T1	S066	Post-travel	Eastern Africa	70	3.46391
S070_T0	S070	Pre-travel	Southern Asia	57	3.60812
S070_T1	S070	Post-travel	Southern Asia	68	3.38524
S076_T0	S076	Pre-travel	Southeastern Asia	39	3.00829
S076_T1	S076	Post-travel	Southeastern Asia	74	3.9037
S077_T0	S077	Pre-travel	Eastern Africa	25	2.64736
S077_T1	S077	Post-travel	Eastern Africa	66	3.53122
S079_T0	S079	Pre-travel	Southern Asia	65	3.80428
S079_T1	S079	Post-travel	Southern Asia	54	3.54179
S080_T0	S080	Pre-travel	Southeastern Asia	25	2.53934
S080_T1	S080	Post-travel	Southeastern Asia	84	3.90044
S082_T0	S082	Pre-travel	Northern Africa	37	2.91639
S082_T1	S082	Post-travel	Northern Africa	41	2.77334
S083_T0	S083	Pre-travel	Northern Africa	34	3.02875
S083_T1	S083	Post-travel	Northern Africa	32	2.98444
S085_T0	S085	Pre-travel	Southern Asia	28	2.70295
S085_T1	S085	Post-travel	Southern Asia	59	3.67211
S086_T0	S086	Pre-travel	Northern Africa	40	3.03084
S086_T1	S086	Post-travel	Northern Africa	38	3.05455
S088_T0	S088	Pre-travel	Eastern Africa	50	3.45052
S088_T1	S088	Post-travel	Eastern Africa	66	3.53691
S089_T0	S089	Pre-travel	Eastern Africa	53	3.65112
S089_T1	S089	Post-travel	Eastern Africa	58	3.49554
S096_T0	S096	Pre-travel	Eastern Africa	72	3.79039
S096_T1	S096	Post-travel	Eastern Africa	66	3.78444
S097_T0	S097	Pre-travel	Eastern Africa	26	2.61584
S097_T1	S097	Post-travel	Eastern Africa	69	3.52359
S098_T0	S098	Pre-travel	Eastern Africa	39	2.78839
S098_T1	S098	Post-travel	Eastern Africa	58	3.57448
S106_T0	S106	Pre-travel	Southeastern Asia	66	3.75069
S106_T1	S106	Post-travel	Southeastern Asia	64	3.53067
S114_T0	S114	Pre-travel	Eastern Africa	74	3.689
S114_T1	S114	Post-travel	Eastern Africa	76	3.64237
S120_T0	S120	Pre-travel	Southern Asia	62	3.71752
S120_T1	S120	Post-travel	Southern Asia	77	3.97718
S123_T0	S123	Pre-travel	Eastern Africa	71	3.80253
S123_T1	S123	Post-travel	Eastern Africa	59	3.73606
S129_T0	S129	Pre-travel	Eastern Africa	67	3.82467
S129_T1	S129	Post-travel	Eastern Africa	73	3.79432
S132_T0	S132	Pre-travel	Northern Africa	17	2.09276
S132_T1	S132	Post-travel	Northern Africa	56	3.41354
S135_T0	S135	Pre-travel	Southern Asia	54	3.56571
S135_T1	S135	Post-travel	Southern Asia	56	3.80209
S136_T0	S136	Pre-travel	Southern Asia	55	3.63402
S136_T1	S136	Post-travel	Southern Asia	60	3.03971
S140_T0	S140	Pre-travel	Southeastern Asia	54	3.5467
S140_T1	S140	Post-travel	Southeastern Asia	76	3.7375
S142_T0	S142	Pre-travel	Eastern Africa	57	3.70719
S142_T1	S142	Post-travel	Eastern Africa	76	3.76934
S151_T0	S151	Pre-travel	Southern Asia	42	3.44092
S151_T1	S151	Post-travel	Southern Asia	48	3.55301
S152_T0	S152	Pre-travel	Eastern Africa	62	3.82321
S152_T1	S152	Post-travel	Eastern Africa	61	3.60495
S153_T0	S153	Pre-travel	Eastern Africa	75	3.82965
S153_T1	S153	Post-travel	Eastern Africa	78	3.87431
S154_T0	S154	Pre-travel	Southern Asia	54	3.47663
S154_T1	S154	Post-travel	Southern Asia	68	3.73787
S155_T0	S155	Pre-travel	Southern Asia	56	3.69562
S155_T1	S155	Post-travel	Southern Asia	55	3.23117
S162_T0	S162	Pre-travel	Northern Africa	73	3.86119
S162_T1	S162	Post-travel	Northern Africa	67	3.58409
S167_T0	S167	Pre-travel	Eastern Africa	31	2.9062
S167_T1	S167	Post-travel	Eastern Africa	51	3.20909
S168_T0	S168	Pre-travel	Southern Asia	62	3.70671
S168_T1	S168	Post-travel	Southern Asia	70	3.89095
S170_T0	S170	Pre-travel	Southeastern Asia	18	2.55325
S170_T1	S170	Post-travel	Southeastern Asia	59	3.67416
S173_T0	S173	Pre-travel	Southeastern Asia	73	3.77815
S173_T1	S173	Post-travel	Southeastern Asia	79	3.87676
S178_T0	S178	Pre-travel	Eastern Africa	61	3.58336
S178_T1	S178	Post-travel	Eastern Africa	56	3.58719
S184_T0	S184	Pre-travel	Northern Africa	29	2.8679
S184_T1	S184	Post-travel	Northern Africa	76	3.92038
S186_T0	S186	Pre-travel	Southern Asia	68	3.80089
S186_T1	S186	Post-travel	Southern Asia	76	3.88239
S188_T0	S188	Pre-travel	Northern Africa	62	3.66376
S188_T1	S188	Post-travel	Northern Africa	59	3.67967
S189_T0	S189	Pre-travel	Northern Africa	29	2.81757
S189_T1	S189	Post-travel	Northern Africa	28	2.75347
S190_T0	S190	Pre-travel	Eastern Africa	50	3.59112
S190_T1	S190	Post-travel	Eastern Africa	57	3.67278
S008_T0	S008	Pre-travel	Northern Africa	61	3.38528
S008_T1	S008	Post-travel	Northern Africa	68	3.52407
S009_T0	S009	Pre-travel	Northern Africa	21	2.5949
S009_T1	S009	Post-travel	Northern Africa	50	3.45694
S015_T0	S015	Pre-travel	Southern Asia	22	2.66195
S015_T1	S015	Post-travel	Southern Asia	70	3.78291
S049_T0	S049	Pre-travel	Northern Africa	54	3.65035
S049_T1	S049	Post-travel	Northern Africa	73	3.86568
S050_T0	S050	Pre-travel	Southern Asia	46	2.94273
S050_T1	S050	Post-travel	Southern Asia	75	3.82833
S052_T0	S052	Pre-travel	Southeastern Asia	72	3.63224
S052_T1	S052	Post-travel	Southeastern Asia	74	3.87643
S067_T0	S067	Pre-travel	Eastern Africa	32	2.96272
S067_T1	S067	Post-travel	Eastern Africa	66	3.76441
S068_T0	S068	Pre-travel	Eastern Africa	61	3.59755
S068_T1	S068	Post-travel	Eastern Africa	72	3.85108
S069_T0	S069	Pre-travel	Southern Asia	30	2.6153
S069_T1	S069	Post-travel	Southern Asia	59	3.467
S071_T0	S071	Pre-travel	Southeastern Asia	34	2.67487
S071_T1	S071	Post-travel	Southeastern Asia	74	3.74123
S073_T0	S073	Pre-travel	Eastern Africa	18	2.22707
S073_T1	S073	Post-travel	Eastern Africa	59	3.63519
S074_T0	S074	Pre-travel	Northern Africa	61	3.60241
S074_T1	S074	Post-travel	Northern Africa	62	3.56149
S081_T0	S081	Pre-travel	Southeastern Asia	23	2.22514
S081_T1	S081	Post-travel	Southeastern Asia	29	2.50944
S093_T0	S093	Pre-travel	Northern Africa	66	3.62626
S093_T1	S093	Post-travel	Northern Africa	66	3.70618
S110_T0	S110	Pre-travel	Southeastern Asia	76	3.86488
S110_T1	S110	Post-travel	Southeastern Asia	77	3.90468
S111_T0	S111	Pre-travel	Northern Africa	20	2.29117
S111_T1	S111	Post-travel	Northern Africa	66	3.4291
S112_T0	S112	Pre-travel	Northern Africa	60	3.76777
S112_T1	S112	Post-travel	Northern Africa	62	3.79339
S115_T0	S115	Pre-travel	Southeastern Asia	35	3.05618
S115_T1	S115	Post-travel	Southeastern Asia	38	2.76399
S122_T0	S122	Pre-travel	Southeastern Asia	73	3.80545
S122_T1	S122	Post-travel	Southeastern Asia	61	3.73178
S130_T0	S130	Pre-travel	Southeastern Asia	61	3.61097
S130_T1	S130	Post-travel	Southeastern Asia	85	3.95799
S143_T0	S143	Pre-travel	Eastern Africa	55	3.52318
S143_T1	S143	Post-travel	Eastern Africa	69	3.62184
S145_T0	S145	Pre-travel	Northern Africa	63	3.61576
S145_T1	S145	Post-travel	Northern Africa	65	3.73028
S146_T0	S146	Pre-travel	Northern Africa	61	3.73691
S146_T1	S146	Post-travel	Northern Africa	66	3.91186
S149_T0	S149	Pre-travel	Eastern Africa	70	3.65306
S149_T1	S149	Post-travel	Eastern Africa	74	3.73135
S150_T0	S150	Pre-travel	Northern Africa	59	3.55729
S150_T1	S150	Post-travel	Northern Africa	70	3.73376
S165_T0	S165	Pre-travel	Southern Asia	59	3.74958
S165_T1	S165	Post-travel	Southern Asia	71	3.89453
S166_T0	S166	Pre-travel	Southern Asia	54	3.42624
S166_T1	S166	Post-travel	Southern Asia	42	2.65823
S172_T0	S172	Pre-travel	Northern Africa	65	3.81366
S172_T1	S172	Post-travel	Northern Africa	66	3.56737
S179_T0	S179	Pre-travel	Southeastern Asia	57	3.53506
S179_T1	S179	Post-travel	Southeastern Asia	67	3.59229
S182_T0	S182	Pre-travel	Northern Africa	40	2.78094
S182_T1	S182	Post-travel	Northern Africa	70	3.55798
S004_T0	S004	Pre-travel	Southeastern Asia	29	2.83722
S004_T1	S004	Post-travel	Southeastern Asia	64	3.75982
S006_T0	S006	Pre-travel	Southern Asia	35	3.00554
S006_T1	S006	Post-travel	Southern Asia	72	3.78688
S007_T0	S007	Pre-travel	Southern Asia	49	3.2614
S007_T1	S007	Post-travel	Southern Asia	65	3.80188
S014_T0	S014	Pre-travel	Northern Africa	59	3.73501
S014_T1	S014	Post-travel	Northern Africa	57	3.59784
S020_T0	S020	Pre-travel	Southeastern Asia	43	3.43458
S020_T1	S020	Post-travel	Southeastern Asia	69	3.55239
S021_T0	S021	Pre-travel	Northern Africa	66	3.72663
S021_T1	S021	Post-travel	Northern Africa	70	3.82016
S022_T0	S022	Pre-travel	Northern Africa	46	3.39729
S022_T1	S022	Post-travel	Northern Africa	56	3.50517
S026_T0	S026	Pre-travel	Southeastern Asia	67	3.83718
S026_T1	S026	Post-travel	Southeastern Asia	73	3.65889
S028_T0	S028	Pre-travel	Southeastern Asia	71	3.90741
S028_T1	S028	Post-travel	Southeastern Asia	87	3.84292
S035_T0	S035	Pre-travel	Eastern Africa	61	3.72207
S035_T1	S035	Post-travel	Eastern Africa	60	3.6427
S036_T0	S036	Pre-travel	Southeastern Asia	55	3.4325
S036_T1	S036	Post-travel	Southeastern Asia	70	3.72666
S038_T0	S038	Pre-travel	Southeastern Asia	45	3.1833
S038_T1	S038	Post-travel	Southeastern Asia	72	3.62921
S043_T0	S043	Pre-travel	Southeastern Asia	60	3.56462
S043_T1	S043	Post-travel	Southeastern Asia	77	3.84308
S044_T0	S044	Pre-travel	Southeastern Asia	60	3.61199
S044_T1	S044	Post-travel	Southeastern Asia	75	3.77997
S045_T0	S045	Pre-travel	Southern Asia	22	2.79805
S045_T1	S045	Post-travel	Southern Asia	60	3.69997
S047_T0	S047	Pre-travel	Southern Asia	23	2.67246
S047_T1	S047	Post-travel	Southern Asia	69	3.4156
S053_T0	S053	Pre-travel	Northern Africa	64	3.7337
S053_T1	S053	Post-travel	Northern Africa	53	3.62076
S056_T0	S056	Pre-travel	Southern Asia	66	3.80469
S056_T1	S056	Post-travel	Southern Asia	76	3.86187
S057_T0	S057	Pre-travel	Southern Asia	27	2.77701
S057_T1	S057	Post-travel	Southern Asia	52	3.40291
S058_T0	S058	Pre-travel	Southern Asia	43	2.91434
S058_T1	S058	Post-travel	Southern Asia	69	3.29398
S059_T0	S059	Pre-travel	Southeastern Asia	63	3.82269
S059_T1	S059	Post-travel	Southeastern Asia	72	3.78647
S062_T0	S062	Pre-travel	Eastern Africa	50	3.39097
S062_T1	S062	Post-travel	Eastern Africa	69	3.85901
S078_T0	S078	Pre-travel	Eastern Africa	22	2.78593
S078_T1	S078	Post-travel	Eastern Africa	52	3.70532
S084_T0	S084	Pre-travel	Southeastern Asia	32	3.04104
S084_T1	S084	Post-travel	Southeastern Asia	42	3.19879
S087_T0	S087	Pre-travel	Eastern Africa	63	3.71651
S087_T1	S087	Post-travel	Eastern Africa	69	3.94583
S092_T0	S092	Pre-travel	Northern Africa	48	3.47586
S092_T1	S092	Post-travel	Northern Africa	65	3.6468
S094_T0	S094	Pre-travel	Northern Africa	29	2.53119
S094_T1	S094	Post-travel	Northern Africa	63	2.85346
S095_T0	S095	Pre-travel	Northern Africa	33	3.05206
S095_T1	S095	Post-travel	Northern Africa	74	3.97741
S101_T0	S101	Pre-travel	Southeastern Asia	76	3.61253
S101_T1	S101	Post-travel	Southeastern Asia	86	3.97122
S103_T0	S103	Pre-travel	Northern Africa	29	2.79124
S103_T1	S103	Post-travel	Northern Africa	57	3.63255
S104_T0	S104	Pre-travel	Northern Africa	61	3.71668
S104_T1	S104	Post-travel	Northern Africa	67	3.70987
S105_T0	S105	Pre-travel	Eastern Africa	61	3.66862
S105_T1	S105	Post-travel	Eastern Africa	64	3.21124
S107_T0	S107	Pre-travel	Southern Asia	54	3.30999
S107_T1	S107	Post-travel	Southern Asia	62	3.61158
S108_T0	S108	Pre-travel	Southern Asia	61	3.73624
S108_T1	S108	Post-travel	Southern Asia	67	3.57341
S109_T0	S109	Pre-travel	Southern Asia	52	3.35021
S109_T1	S109	Post-travel	Southern Asia	63	3.78681
S116_T0	S116	Pre-travel	Southeastern Asia	52	3.38289
S116_T1	S116	Post-travel	Southeastern Asia	86	3.76349
S117_T0	S117	Pre-travel	Southeastern Asia	67	3.63257
S117_T1	S117	Post-travel	Southeastern Asia	75	3.87466
S118_T0	S118	Pre-travel	Southern Asia	65	3.72969
S118_T1	S118	Post-travel	Southern Asia	82	3.51889
S119_T0	S119	Pre-travel	Southeastern Asia	59	3.74113
S119_T1	S119	Post-travel	Southeastern Asia	80	3.70628
S124_T0	S124	Pre-travel	Southeastern Asia	58	3.59788
S124_T1	S124	Post-travel	Southeastern Asia	68	3.84689
S126_T0	S126	Pre-travel	Southeastern Asia	68	3.83985
S126_T1	S126	Post-travel	Southeastern Asia	80	4.00817
S127_T0	S127	Pre-travel	Southeastern Asia	40	3.31383
S127_T1	S127	Post-travel	Southeastern Asia	74	3.91736
S128_T0	S128	Pre-travel	Northern Africa	63	3.67266
S128_T1	S128	Post-travel	Northern Africa	69	3.82994
S131_T0	S131	Pre-travel	Northern Africa	56	3.50764
S131_T1	S131	Post-travel	Northern Africa	66	3.57156
S133_T0	S133	Pre-travel	Southeastern Asia	58	3.73799
S133_T1	S133	Post-travel	Southeastern Asia	63	3.53507
S134_T0	S134	Pre-travel	Southeastern Asia	74	3.69523
S134_T1	S134	Post-travel	Southeastern Asia	73	3.79237
S137_T0	S137	Pre-travel	Southern Asia	75	3.72956
S137_T1	S137	Post-travel	Southern Asia	69	3.67961
S138_T0	S138	Pre-travel	Southern Asia	70	3.67623
S138_T1	S138	Post-travel	Southern Asia	75	3.64215
S139_T0	S139	Pre-travel	Southeastern Asia	26	2.65848
S139_T1	S139	Post-travel	Southeastern Asia	70	3.68552
S141_T0	S141	Pre-travel	Eastern Africa	27	2.83998
S141_T1	S141	Post-travel	Eastern Africa	59	3.35318
S148_T0	S148	Pre-travel	Northern Africa	55	3.48509
S148_T1	S148	Post-travel	Northern Africa	54	3.57427
S156_T0	S156	Pre-travel	Southeastern Asia	69	3.41505
S156_T1	S156	Post-travel	Southeastern Asia	70	3.72133
S157_T0	S157	Pre-travel	Southeastern Asia	62	3.75389
S157_T1	S157	Post-travel	Southeastern Asia	46	3.08695
S160_T0	S160	Pre-travel	Southeastern Asia	64	3.67205
S160_T1	S160	Post-travel	Southeastern Asia	71	3.71804
S161_T0	S161	Pre-travel	Northern Africa	71	3.80235
S161_T1	S161	Post-travel	Northern Africa	78	3.84769
S174_T0	S174	Pre-travel	Southeastern Asia	64	3.72981
S174_T1	S174	Post-travel	Southeastern Asia	84	3.78233
S175_T0	S175	Pre-travel	Northern Africa	60	3.67245
S175_T1	S175	Post-travel	Northern Africa	72	3.8733
S176_T0	S176	Pre-travel	Northern Africa	64	3.67778
S176_T1	S176	Post-travel	Northern Africa	63	3.77815
S180_T0	S180	Pre-travel	Southern Asia	45	3.33676
S180_T1	S180	Post-travel	Southern Asia	27	2.52553
S181_T0	S181	Pre-travel	Southern Asia	54	3.64255
S181_T1	S181	Post-travel	Southern Asia	53	3.64494
S185_T0	S185	Pre-travel	Southeastern Asia	64	3.82757
S185_T1	S185	Post-travel	Southeastern Asia	67	3.71591
S001_T0	S001	Pre-travel	Southeastern Asia	53	3.22434
S001_T1	S001	Post-travel	Southeastern Asia	78	3.62836
S027_T0	S027	Pre-travel	Eastern Africa	21	2.47153
S027_T1	S027	Post-travel	Eastern Africa	59	3.70949
S030_T0	S030	Pre-travel	Southeastern Asia	55	3.58006
S030_T1	S030	Post-travel	Southeastern Asia	77	3.75377
S032_T0	S032	Pre-travel	Southeastern Asia	54	3.62144
S032_T1	S032	Post-travel	Southeastern Asia	75	3.67086
S033_T0	S033	Pre-travel	Southern Asia	33	2.8524
S033_T1	S033	Post-travel	Southern Asia	69	3.82641
S034_T0	S034	Pre-travel	Southern Asia	31	2.95142
S034_T1	S034	Post-travel	Southern Asia	31	2.86118
S046_T0	S046	Pre-travel	Southern Asia	53	3.56916
S046_T1	S046	Post-travel	Southern Asia	57	3.70291
S055_T0	S055	Pre-travel	Eastern Africa	76	3.9509
S055_T1	S055	Post-travel	Eastern Africa	73	3.64212
S090_T0	S090	Pre-travel	Eastern Africa	49	3.33143
S090_T1	S090	Post-travel	Eastern Africa	61	3.75639
S091_T0	S091	Pre-travel	Eastern Africa	59	3.71668
S091_T1	S091	Post-travel	Eastern Africa	39	3.18023
S099_T0	S099	Pre-travel	Southern Asia	67	3.55497
S099_T1	S099	Post-travel	Southern Asia	80	3.93386
S100_T0	S100	Pre-travel	Southern Asia	52	3.51241
S100_T1	S100	Post-travel	Southern Asia	62	3.49081
S102_T0	S102	Pre-travel	Southeastern Asia	73	3.6585
S102_T1	S102	Post-travel	Southeastern Asia	69	3.87221
S125_T0	S125	Pre-travel	Southern Asia	64	3.69933
S125_T1	S125	Post-travel	Southern Asia	56	3.44731
S147_T0	S147	Pre-travel	Southern Asia	55	3.3731
S147_T1	S147	Post-travel	Southern Asia	68	3.73422
S158_T0	S158	Pre-travel	Southern Asia	61	3.10887
S158_T1	S158	Post-travel	Southern Asia	73	3.89268
S159_T0	S159	Pre-travel	Southern Asia	58	3.71495
S159_T1	S159	Post-travel	Southern Asia	63	3.62343
S164_T0	S164	Pre-travel	Southeastern Asia	43	3.16218
S164_T1	S164	Post-travel	Southeastern Asia	73	3.4753
S169_T0	S169	Pre-travel	Southern Asia	64	3.5797
S169_T1	S169	Post-travel	Southern Asia	66	3.85135
S171_T0	S171	Pre-travel	Southeastern Asia	45	3.387
S171_T1	S171	Post-travel	Southeastern Asia	52	3.55077
S177_T0	S177	Pre-travel	Southeastern Asia	65	3.71001
S177_T1	S177	Post-travel	Southeastern Asia	75	3.57325
S010_T0	S010	Pre-travel	Eastern Africa	28	2.79273
S010_T1	S010	Post-travel	Eastern Africa	27	2.64377
S012_T0	S012	Pre-travel	Eastern Africa	62	3.61373
S012_T1	S012	Post-travel	Eastern Africa	72	3.58224
S013_T0	S013	Pre-travel	Eastern Africa	21	2.70985
S013_T1	S013	Post-travel	Eastern Africa	56	3.37771
S054_T0	S054	Pre-travel	Northern Africa	70	3.87683
S054_T1	S054	Post-travel	Northern Africa	52	3.68173
S075_T0	S075	Pre-travel	Northern Africa	75	3.74101
S075_T1	S075	Post-travel	Northern Africa	65	3.38491
S113_T0	S113	Pre-travel	Eastern Africa	29	2.77334
S113_T1	S113	Post-travel	Eastern Africa	64	3.56003
S187_T0	S187	Pre-travel	Eastern Africa	66	3.67167
S187_T1	S187	Post-travel	Eastern Africa	71	3.82176
S029_T0	S029	Pre-travel	Eastern Africa	62	3.66701
S029_T1	S029	Post-travel	Eastern Africa	60	3.7487
S060_T0	S060	Pre-travel	Eastern Africa	30	2.99258
S060_T1	S060	Post-travel	Eastern Africa	79	3.82855
S061_T0	S061	Pre-travel	Southeastern Asia	36	2.77674
S061_T1	S061	Post-travel	Southeastern Asia	59	3.6241
S072_T0	S072	Pre-travel	Eastern Africa	29	2.7384
S072_T1	S072	Post-travel	Eastern Africa	69	3.77201
S121_T0	S121	Pre-travel	Eastern Africa	51	3.244
S121_T1	S121	Post-travel	Eastern Africa	65	3.82388
S144_T0	S144	Pre-travel	Eastern Africa	53	3.4982
S144_T1	S144	Post-travel	Eastern Africa	61	3.78619
S183_T0	S183	Pre-travel	Southern Asia	46	3.49768
S183_T1	S183	Post-travel	Southern Asia	62	3.66538
S048_T0	S048	Pre-travel	Northern Africa	27	2.82328
S048_T1	S048	Post-travel	Northern Africa	62	3.65903
S002_T0	S002	Pre-travel	Southern Asia	37	2.99554
S002_T1	S002	Post-travel	Southern Asia	26	2.66104
S023_T0	S023	Pre-travel	Southern Asia	54	3.36246
S023_T1	S023	Post-travel	Southern Asia	59	3.54042
S024_T0	S024	Pre-travel	Southern Asia	11	2.07573
S024_T1	S024	Post-travel	Southern Asia	46	3.56019
S065_T0	S065	Pre-travel	Eastern Africa	84	4.03808
S065_T1	S065	Post-travel	Eastern Africa	74	3.40249
S163_T0	S163	Pre-travel	Northern Africa	56	3.59825
S163_T1	S163	Post-travel	Northern Africa	34	2.99769

## Sheet: 4B_CIs_richness
Travel_destination_subregion	Pre-travel	Post-travel	difference	fc	bca_ci_low	bca_ci_high	Significant
Northern Africa	49.8372	60	10.1628	1.20392	5.4309	15.6758	TRUE
Eastern Africa	49.8636	63.5227	13.6591	1.27393	8.89507	18.7045	TRUE
Southern Asia	50.1961	62.8039	12.6078	1.25117	8.54902	16.6863	TRUE
Southeastern Asia	54.3077	69.9038	15.5962	1.28718	11.7236	19.9615	TRUE

## Sheet: 4B_CIs_shannon
Travel_destination_subregion	Pre-travel	Post-travel	difference	fc	bca_ci_low	bca_ci_high	Significant
Northern Africa	3.32683	3.54973	0.222898	1.067	0.108602	0.369706	TRUE
Eastern Africa	3.33602	3.61069	0.274674	1.08234	0.143489	0.417631	TRUE
Southern Asia	3.3113	3.58105	0.269743	1.08146	0.121219	0.427385	TRUE
Southeastern Asia	3.42462	3.67915	0.254534	1.07432	0.152792	0.369995	TRUE

## Sheet: 2B_CIs
AlphaDivMetric	Pre-travel	Post-travel	difference	fc	bca_ci_low	bca_ci_high	Significant
Richness	51.1632	64.2789	13.1158	1.25635	10.9747	15.4474	TRUE
Shannon	3.35155	3.60767	0.25612	1.07642	0.191203	0.324525	TRUE

## Sheet: 2C & 4C
Sample_1	Sample_2	bray_dist	combSamp	sameSample	Subject_id_1	Subject_id_2	sameSubject	Timepoint_1	Timepoint_2	sameTimepoint	Travel_destination_subregion_1	Travel_destination_subregion_2	sameTravelSubregion
S001_T0	S001_T0	0	S001_T0__S001_T0	TRUE	S001	S001	TRUE	Pre-travel	Pre-travel	TRUE	Southeastern Asia	Southeastern Asia	TRUE
S001_T1	S001_T0	0.876076	S001_T0__S001_T1	FALSE	S001	S001	TRUE	Post-travel	Pre-travel	FALSE	Southeastern Asia	Southeastern Asia	TRUE
S174_T0	S001_T0	0.768585	S001_T0__S174_T0	FALSE	S174	S001	FALSE	Pre-travel	Pre-travel	TRUE	Southeastern Asia	Southeastern Asia	TRUE
S002_T0	S001_T0	0.576014	S001_T0__S002_T0	FALSE	S002	S001	FALSE	Pre-travel	Pre-travel	TRUE	Southern Asia	Southeastern Asia	FALSE
S134_T0	S001_T0	0.626078	S001_T0__S134_T0	FALSE	S134	S001	FALSE	Pre-travel	Pre-travel	TRUE	Southeastern Asia	Southeastern Asia	TRUE
S158_T0	S001_T0	0.524844	S001_T0__S158_T0	FALSE	S158	S001	FALSE	Pre-travel	Pre-travel	TRUE	Southern Asia	Southeastern Asia	FALSE
S158_T1	S001_T0	0.725678	S001_T0__S158_T1	FALSE	S158	S001	FALSE	Post-travel	Pre-travel	FALSE	Southern Asia	Southeastern Asia	FALSE
S002_T1	S001_T0	0.573303	S001_T0__S002_T1	FALSE	S002	S001	FALSE	Post-travel	Pre-travel	FALSE	Southern Asia	Southeastern Asia	FALSE
S059_T1	S001_T0	0.832414	S001_T0__S059_T1	FALSE	S059	S001	FALSE	Post-travel	Pre-travel	FALSE	Southeastern Asia	Southeastern Asia	TRUE
S014_T0	S001_T0	0.750547	S001_T0__S014_T0	FALSE	S014	S001	FALSE	Pre-travel	Pre-travel	TRUE	Northern Africa	Southeastern Asia	FALSE
S089_T0	S001_T0	0.72156	S001_T0__S089_T0	FALSE	S089	S001	FALSE	Pre-travel	Pre-travel	TRUE	Eastern Africa	Southeastern Asia	FALSE
S135_T1	S001_T0	0.582862	S001_T0__S135_T1	FALSE	S135	S001	FALSE	Post-travel	Pre-travel	FALSE	Southern Asia	Southeastern Asia	FALSE
S003_T0	S001_T0	0.464663	S001_T0__S003_T0	FALSE	S003	S001	FALSE	Pre-travel	Pre-travel	TRUE	Southeastern Asia	Southeastern Asia	TRUE
S190_T1	S001_T0	0.90691	S001_T0__S190_T1	FALSE	S190	S001	FALSE	Post-travel	Pre-travel	FALSE	Eastern Africa	Southeastern Asia	FALSE
S071_T0	S001_T0	0.595696	S001_T0__S071_T0	FALSE	S071	S001	FALSE	Pre-travel	Pre-travel	TRUE	Southeastern Asia	Southeastern Asia	TRUE
S110_T0	S001_T0	0.860213	S001_T0__S110_T0	FALSE	S110	S001	FALSE	Pre-travel	Pre-travel	TRUE	Southeastern Asia	Southeastern Asia	TRUE
S041_T0	S001_T0	0.810436	S001_T0__S041_T0	FALSE	S041	S001	FALSE	Pre-travel	Pre-travel	TRUE	Southern Asia	Southeastern Asia	FALSE
S062_T1	S001_T0	0.817778	S001_T0__S062_T1	FALSE	S062	S001	FALSE	Post-travel	Pre-travel	FALSE	Eastern Africa	Southeastern Asia	FALSE
S046_T0	S001_T0	0.695372	S001_T0__S046_T0	FALSE	S046	S001	FALSE	Pre-travel	Pre-travel	TRUE	Southern Asia	Southeastern Asia	FALSE
S003_T1	S001_T0	0.509231	S001_T0__S003_T1	FALSE	S003	S001	FALSE	Post-travel	Pre-travel	FALSE	Southeastern Asia	Southeastern Asia	TRUE
S066_T1	S001_T0	0.866563	S001_T0__S066_T1	FALSE	S066	S001	FALSE	Post-travel	Pre-travel	FALSE	Eastern Africa	Southeastern Asia	FALSE
S146_T0	S001_T0	0.717559	S001_T0__S146_T0	FALSE	S146	S001	FALSE	Pre-travel	Pre-travel	TRUE	Northern Africa	Southeastern Asia	FALSE
S153_T1	S001_T0	0.820258	S001_T0__S153_T1	FALSE	S153	S001	FALSE	Post-travel	Pre-travel	FALSE	Eastern Africa	Southeastern Asia	FALSE
S004_T0	S001_T0	0.732845	S001_T0__S004_T0	FALSE	S004	S001	FALSE	Pre-travel	Pre-travel	TRUE	Southeastern Asia	Southeastern Asia	TRUE
S162_T1	S001_T0	0.674504	S001_T0__S162_T1	FALSE	S162	S001	FALSE	Post-travel	Pre-travel	FALSE	Northern Africa	Southeastern Asia	FALSE
S085_T0	S001_T0	0.444894	S001_T0__S085_T0	FALSE	S085	S001	FALSE	Pre-travel	Pre-travel	TRUE	Southern Asia	Southeastern Asia	FALSE
S070_T1	S001_T0	0.908622	S001_T0__S070_T1	FALSE	S070	S001	FALSE	Post-travel	Pre-travel	FALSE	Southern Asia	Southeastern Asia	FALSE
S097_T0	S001_T0	0.783267	S001_T0__S097_T0	FALSE	S097	S001	FALSE	Pre-travel	Pre-travel	TRUE	Eastern Africa	Southeastern Asia	FALSE
S028_T0	S001_T0	0.712428	S001_T0__S028_T0	FALSE	S028	S001	FALSE	Pre-travel	Pre-travel	TRUE	Southeastern Asia	Southeastern Asia	TRUE
S174_T1	S001_T0	0.805367	S001_T0__S174_T1	FALSE	S174	S001	FALSE	Post-travel	Pre-travel	FALSE	Southeastern Asia	Southeastern Asia	TRUE
S004_T1	S001_T0	0.692025	S001_T0__S004_T1	FALSE	S004	S001	FALSE	Post-travel	Pre-travel	FALSE	Southeastern Asia	Southeastern Asia	TRUE
S106_T0	S001_T0	0.687498	S001_T0__S106_T0	FALSE	S106	S001	FALSE	Pre-travel	Pre-travel	TRUE	Southeastern Asia	Southeastern Asia	TRUE
S061_T0	S001_T0	0.779418	S001_T0__S061_T0	FALSE	S061	S001	FALSE	Pre-travel	Pre-travel	TRUE	Southeastern Asia	Southeastern Asia	TRUE
S172_T0	S001_T0	0.702424	S001_T0__S172_T0	FALSE	S172	S001	FALSE	Pre-travel	Pre-travel	TRUE	Northern Africa	Southeastern Asia	FALSE
S186_T1	S001_T0	0.757532	S001_T0__S186_T1	FALSE	S186	S001	FALSE	Post-travel	Pre-travel	FALSE	Southern Asia	Southeastern Asia	FALSE
S014_T1	S001_T0	0.850574	S001_T0__S014_T1	FALSE	S014	S001	FALSE	Post-travel	Pre-travel	FALSE	Northern Africa	Southeastern Asia	FALSE
S088_T0	S001_T0	0.933035	S001_T0__S088_T0	FALSE	S088	S001	FALSE	Pre-travel	Pre-travel	TRUE	Eastern Africa	Southeastern Asia	FALSE
S172_T1	S001_T0	0.893561	S001_T0__S172_T1	FALSE	S172	S001	FALSE	Post-travel	Pre-travel	FALSE	Northern Africa	Southeastern Asia	FALSE
S005_T0	S001_T0	0.77545	S001_T0__S005_T0	FALSE	S005	S001	FALSE	Pre-travel	Pre-travel	TRUE	Southern Asia	Southeastern Asia	FALSE
S024_T1	S001_T0	0.710568	S001_T0__S024_T1	FALSE	S024	S001	FALSE	Post-travel	Pre-travel	FALSE	Southern Asia	Southeastern Asia	FALSE
S142_T0	S001_T0	0.79486	S001_T0__S142_T0	FALSE	S142	S001	FALSE	Pre-travel	Pre-travel	TRUE	Eastern Africa	Southeastern Asia	FALSE
S020_T0	S001_T0	0.632879	S001_T0__S020_T0	FALSE	S020	S001	FALSE	Pre-travel	Pre-travel	TRUE	Southeastern Asia	Southeastern Asia	TRUE
S060_T1	S001_T0	0.596566	S001_T0__S060_T1	FALSE	S060	S001	FALSE	Post-travel	Pre-travel	FALSE	Eastern Africa	Southeastern Asia	FALSE
S175_T0	S001_T0	0.40781	S001_T0__S175_T0	FALSE	S175	S001	FALSE	Pre-travel	Pre-travel	TRUE	Northern Africa	Southeastern Asia	FALSE
S096_T0	S001_T0	0.823204	S001_T0__S096_T0	FALSE	S096	S001	FALSE	Pre-travel	Pre-travel	TRUE	Eastern Africa	Southeastern Asia	FALSE
S115_T0	S001_T0	0.629862	S001_T0__S115_T0	FALSE	S115	S001	FALSE	Pre-travel	Pre-travel	TRUE	Southeastern Asia	Southeastern Asia	TRUE
S087_T0	S001_T0	0.826753	S001_T0__S087_T0	FALSE	S087	S001	FALSE	Pre-travel	Pre-travel	TRUE	Eastern Africa	Southeastern Asia	FALSE
S115_T1	S001_T0	0.6814	S001_T0__S115_T1	FALSE	S115	S001	FALSE	Post-travel	Pre-travel	FALSE	Southeastern Asia	Southeastern Asia	TRUE
S005_T1	S001_T0	0.70654	S001_T0__S005_T1	FALSE	S005	S001	FALSE	Post-travel	Pre-travel	FALSE	Southern Asia	Southeastern Asia	FALSE
S151_T0	S001_T0	0.787011	S001_T0__S151_T0	FALSE	S151	S001	FALSE	Pre-travel	Pre-travel	TRUE	Southern Asia	Southeastern Asia	FALSE
S088_T1	S001_T0	0.965325	S001_T0__S088_T1	FALSE	S088	S001	FALSE	Post-travel	Pre-travel	FALSE	Eastern Africa	Southeastern Asia	FALSE
S177_T1	S001_T0	0.934489	S001_T0__S177_T1	FALSE	S177	S001	FALSE	Post-travel	Pre-travel	FALSE	Southeastern Asia	Southeastern Asia	TRUE
S150_T1	S001_T0	0.832156	S001_T0__S150_T1	FALSE	S150	S001	FALSE	Post-travel	Pre-travel	FALSE	Northern Africa	Southeastern Asia	FALSE
S068_T0	S001_T0	0.837259	S001_T0__S068_T0	FALSE	S068	S001	FALSE	Pre-travel	Pre-travel	TRUE	Eastern Africa	Southeastern Asia	FALSE
S082_T1	S001_T0	0.761646	S001_T0__S082_T1	FALSE	S082	S001	FALSE	Post-travel	Pre-travel	FALSE	Northern Africa	Southeastern Asia	FALSE
S143_T0	S001_T0	0.881497	S001_T0__S143_T0	FALSE	S143	S001	FALSE	Pre-travel	Pre-travel	TRUE	Eastern Africa	Southeastern Asia	FALSE
S097_T1	S001_T0	0.808215	S001_T0__S097_T1	FALSE	S097	S001	FALSE	Post-travel	Pre-travel	FALSE	Eastern Africa	Southeastern Asia	FALSE
S045_T1	S001_T0	0.719274	S001_T0__S045_T1	FALSE	S045	S001	FALSE	Post-travel	Pre-travel	FALSE	Southern Asia	Southeastern Asia	FALSE
S076_T0	S001_T0	0.652514	S001_T0__S076_T0	FALSE	S076	S001	FALSE	Pre-travel	Pre-travel	TRUE	Southeastern Asia	Southeastern Asia	TRUE
S145_T1	S001_T0	0.758051	S001_T0__S145_T1	FALSE	S145	S001	FALSE	Post-travel	Pre-travel	FALSE	Northern Africa	Southeastern Asia	FALSE
S130_T0	S001_T0	0.869118	S001_T0__S130_T0	FALSE	S130	S001	FALSE	Pre-travel	Pre-travel	TRUE	Southeastern Asia	Southeastern Asia	TRUE
S017_T0	S001_T0	0.805839	S001_T0__S017_T0	FALSE	S017	S001	FALSE	Pre-travel	Pre-travel	TRUE	Southern Asia	Southeastern Asia	FALSE
S026_T0	S001_T0	0.700465	S001_T0__S026_T0	FALSE	S026	S001	FALSE	Pre-travel	Pre-travel	TRUE	Southeastern Asia	Southeastern Asia	TRUE
S006_T0	S001_T0	0.669758	S001_T0__S006_T0	FALSE	S006	S001	FALSE	Pre-travel	Pre-travel	TRUE	Southern Asia	Southeastern Asia	FALSE
S047_T1	S001_T0	0.885825	S001_T0__S047_T1	FALSE	S047	S001	FALSE	Post-travel	Pre-travel	FALSE	Southern Asia	Southeastern Asia	FALSE
S108_T1	S001_T0	0.84668	S001_T0__S108_T1	FALSE	S108	S001	FALSE	Post-travel	Pre-travel	FALSE	Southern Asia	Southeastern Asia	FALSE
S137_T0	S001_T0	0.925284	S001_T0__S137_T0	FALSE	S137	S001	FALSE	Pre-travel	Pre-travel	TRUE	Southern Asia	Southeastern Asia	FALSE
S103_T1	S001_T0	0.936341	S001_T0__S103_T1	FALSE	S103	S001	FALSE	Post-travel	Pre-travel	FALSE	Northern Africa	Southeastern Asia	FALSE
S117_T1	S001_T0	0.763168	S001_T0__S117_T1	FALSE	S117	S001	FALSE	Post-travel	Pre-travel	FALSE	Southeastern Asia	Southeastern Asia	TRUE
S111_T0	S001_T0	0.77029	S001_T0__S111_T0	FALSE	S111	S001	FALSE	Pre-travel	Pre-travel	TRUE	Northern Africa	Southeastern Asia	FALSE
S015_T0	S001_T0	0.755911	S001_T0__S015_T0	FALSE	S015	S001	FALSE	Pre-travel	Pre-travel	TRUE	Southern Asia	Southeastern Asia	FALSE
S132_T0	S001_T0	0.489915	S001_T0__S132_T0	FALSE	S132	S001	FALSE	Pre-travel	Pre-travel	TRUE	Northern Africa	Southeastern Asia	FALSE
S113_T1	S001_T0	0.71403	S001_T0__S113_T1	FALSE	S113	S001	FALSE	Post-travel	Pre-travel	FALSE	Eastern Africa	Southeastern Asia	FALSE
S006_T1	S001_T0	0.621522	S001_T0__S006_T1	FALSE	S006	S001	FALSE	Post-travel	Pre-travel	FALSE	Southern Asia	Southeastern Asia	FALSE
S161_T0	S001_T0	0.729871	S001_T0__S161_T0	FALSE	S161	S001	FALSE	Pre-travel	Pre-travel	TRUE	Northern Africa	Southeastern Asia	FALSE
S161_T1	S001_T0	0.781793	S001_T0__S161_T1	FALSE	S161	S001	FALSE	Post-travel	Pre-travel	FALSE	Northern Africa	Southeastern Asia	FALSE
S034_T0	S001_T0	0.815768	S001_T0__S034_T0	FALSE	S034	S001	FALSE	Pre-travel	Pre-travel	TRUE	Southern Asia	Southeastern Asia	FALSE
S182_T0	S001_T0	0.70578	S001_T0__S182_T0	FALSE	S182	S001	FALSE	Pre-travel	Pre-travel	TRUE	Northern Africa	Southeastern Asia	FALSE
S108_T0	S001_T0	0.787128	S001_T0__S108_T0	FALSE	S108	S001	FALSE	Pre-travel	Pre-travel	TRUE	Southern Asia	Southeastern Asia	FALSE
S019_T0	S001_T0	0.763763	S001_T0__S019_T0	FALSE	S019	S001	FALSE	Pre-travel	Pre-travel	TRUE	Northern Africa	Southeastern Asia	FALSE
S031_T1	S001_T0	0.64955	S001_T0__S031_T1	FALSE	S031	S001	FALSE	Post-travel	Pre-travel	FALSE	Southern Asia	Southeastern Asia	FALSE
S100_T0	S001_T0	0.860048	S001_T0__S100_T0	FALSE	S100	S001	FALSE	Pre-travel	Pre-travel	TRUE	Southern Asia	Southeastern Asia	FALSE
S072_T0	S001_T0	0.557962	S001_T0__S072_T0	FALSE	S072	S001	FALSE	Pre-travel	Pre-travel	TRUE	Eastern Africa	Southeastern Asia	FALSE
S037_T0	S001_T0	0.566216	S001_T0__S037_T0	FALSE	S037	S001	FALSE	Pre-travel	Pre-travel	TRUE	Southeastern Asia	Southeastern Asia	TRUE
S007_T0	S001_T0	0.559864	S001_T0__S007_T0	FALSE	S007	S001	FALSE	Pre-travel	Pre-travel	TRUE	Southern Asia	Southeastern Asia	FALSE
S157_T1	S001_T0	0.845937	S001_T0__S157_T1	FALSE	S157	S001	FALSE	Post-travel	Pre-travel	FALSE	Southeastern Asia	Southeastern Asia	TRUE
S084_T1	S001_T0	0.685587	S001_T0__S084_T1	FALSE	S084	S001	FALSE	Post-travel	Pre-travel	FALSE	Southeastern Asia	Southeastern Asia	TRUE
S028_T1	S001_T0	0.795214	S001_T0__S028_T1	FALSE	S028	S001	FALSE	Post-travel	Pre-travel	FALSE	Southeastern Asia	Southeastern Asia	TRUE
S170_T1	S001_T0	0.880854	S001_T0__S170_T1	FALSE	S170	S001	FALSE	Post-travel	Pre-travel	FALSE	Southeastern Asia	Southeastern Asia	TRUE
S149_T0	S001_T0	0.867389	S001_T0__S149_T0	FALSE	S149	S001	FALSE	Pre-travel	Pre-travel	TRUE	Eastern Africa	Southeastern Asia	FALSE
S041_T1	S001_T0	0.839625	S001_T0__S041_T1	FALSE	S041	S001	FALSE	Post-travel	Pre-travel	FALSE	Southern Asia	Southeastern Asia	FALSE
S120_T1	S001_T0	0.784509	S001_T0__S120_T1	FALSE	S120	S001	FALSE	Post-travel	Pre-travel	FALSE	Southern Asia	Southeastern Asia	FALSE
S015_T1	S001_T0	0.875203	S001_T0__S015_T1	FALSE	S015	S001	FALSE	Post-travel	Pre-travel	FALSE	Southern Asia	Southeastern Asia	FALSE
S007_T1	S001_T0	0.646825	S001_T0__S007_T1	FALSE	S007	S001	FALSE	Post-travel	Pre-travel	FALSE	Southern Asia	Southeastern Asia	FALSE
S025_T0	S001_T0	0.862783	S001_T0__S025_T0	FALSE	S025	S001	FALSE	Pre-travel	Pre-travel	TRUE	Southern Asia	Southeastern Asia	FALSE
S056_T1	S001_T0	0.774538	S001_T0__S056_T1	FALSE	S056	S001	FALSE	Post-travel	Pre-travel	FALSE	Southern Asia	Southeastern Asia	FALSE
S128_T0	S001_T0	0.897196	S001_T0__S128_T0	FALSE	S128	S001	FALSE	Pre-travel	Pre-travel	TRUE	Northern Africa	Southeastern Asia	FALSE
S092_T1	S001_T0	0.857467	S001_T0__S092_T1	FALSE	S092	S001	FALSE	Post-travel	Pre-travel	FALSE	Northern Africa	Southeastern Asia	FALSE
S112_T0	S001_T0	0.789005	S001_T0__S112_T0	FALSE	S112	S001	FALSE	Pre-travel	Pre-travel	TRUE	Northern Africa	Southeastern Asia	FALSE
S166_T1	S001_T0	0.788017	S001_T0__S166_T1	FALSE	S166	S001	FALSE	Post-travel	Pre-travel	FALSE	Southern Asia	Southeastern Asia	FALSE
S053_T1	S001_T0	0.800844	S001_T0__S053_T1	FALSE	S053	S001	FALSE	Post-travel	Pre-travel	FALSE	Northern Africa	Southeastern Asia	FALSE
S069_T1	S001_T0	0.615354	S001_T0__S069_T1	FALSE	S069	S001	FALSE	Post-travel	Pre-travel	FALSE	Southern Asia	Southeastern Asia	FALSE
S169_T1	S001_T0	0.71475	S001_T0__S169_T1	FALSE	S169	S001	FALSE	Post-travel	Pre-travel	FALSE	Southern Asia	Southeastern Asia	FALSE
S102_T0	S001_T0	0.781006	S001_T0__S102_T0	FALSE	S102	S001	FALSE	Pre-travel	Pre-travel	TRUE	Southeastern Asia	Southeastern Asia	TRUE
S171_T0	S001_T0	0.87292	S001_T0__S171_T0	FALSE	S171	S001	FALSE	Pre-travel	Pre-travel	TRUE	Southeastern Asia	Southeastern Asia	TRUE
S093_T1	S001_T0	0.70214	S001_T0__S093_T1	FALSE	S093	S001	FALSE	Post-travel	Pre-travel	FALSE	Northern Africa	Southeastern Asia	FALSE
S008_T0	S001_T0	0.699738	S001_T0__S008_T0	FALSE	S008	S001	FALSE	Pre-travel	Pre-travel	TRUE	Northern Africa	Southeastern Asia	FALSE
S049_T1	S001_T0	0.690445	S001_T0__S049_T1	FALSE	S049	S001	FALSE	Post-travel	Pre-travel	FALSE	Northern Africa	Southeastern Asia	FALSE
S080_T0	S001_T0	0.512781	S001_T0__S080_T0	FALSE	S080	S001	FALSE	Pre-travel	Pre-travel	TRUE	Southeastern Asia	Southeastern Asia	TRUE
S146_T1	S001_T0	0.661204	S001_T0__S146_T1	FALSE	S146	S001	FALSE	Post-travel	Pre-travel	FALSE	Northern Africa	Southeastern Asia	FALSE
S051_T1	S001_T0	0.631482	S001_T0__S051_T1	FALSE	S051	S001	FALSE	Post-travel	Pre-travel	FALSE	Southern Asia	Southeastern Asia	FALSE
S170_T0	S001_T0	0.783235	S001_T0__S170_T0	FALSE	S170	S001	FALSE	Pre-travel	Pre-travel	TRUE	Southeastern Asia	Southeastern Asia	TRUE
S129_T0	S001_T0	0.797201	S001_T0__S129_T0	FALSE	S129	S001	FALSE	Pre-travel	Pre-travel	TRUE	Eastern Africa	Southeastern Asia	FALSE
S101_T0	S001_T0	0.851176	S001_T0__S101_T0	FALSE	S101	S001	FALSE	Pre-travel	Pre-travel	TRUE	Southeastern Asia	Southeastern Asia	TRUE
S160_T0	S001_T0	0.795155	S001_T0__S160_T0	FALSE	S160	S001	FALSE	Pre-travel	Pre-travel	TRUE	Southeastern Asia	Southeastern Asia	TRUE
S153_T0	S001_T0	0.860278	S001_T0__S153_T0	FALSE	S153	S001	FALSE	Pre-travel	Pre-travel	TRUE	Eastern Africa	Southeastern Asia	FALSE
S019_T1	S001_T0	0.674018	S001_T0__S019_T1	FALSE	S019	S001	FALSE	Post-travel	Pre-travel	FALSE	Northern Africa	Southeastern Asia	FALSE
S022_T1	S001_T0	0.912737	S001_T0__S022_T1	FALSE	S022	S001	FALSE	Post-travel	Pre-travel	FALSE	Northern Africa	Southeastern Asia	FALSE
S055_T1	S001_T0	0.788485	S001_T0__S055_T1	FALSE	S055	S001	FALSE	Post-travel	Pre-travel	FALSE	Eastern Africa	Southeastern Asia	FALSE
S059_T0	S001_T0	0.613267	S001_T0__S059_T0	FALSE	S059	S001	FALSE	Pre-travel	Pre-travel	TRUE	Southeastern Asia	Southeastern Asia	TRUE
S008_T1	S001_T0	0.660299	S001_T0__S008_T1	FALSE	S008	S001	FALSE	Post-travel	Pre-travel	FALSE	Northern Africa	Southeastern Asia	FALSE
S107_T1	S001_T0	0.617056	S001_T0__S107_T1	FALSE	S107	S001	FALSE	Post-travel	Pre-travel	FALSE	Southern Asia	Southeastern Asia	FALSE
S109_T1	S001_T0	0.750947	S001_T0__S109_T1	FALSE	S109	S001	FALSE	Post-travel	Pre-travel	FALSE	Southern Asia	Southeastern Asia	FALSE
S163_T0	S001_T0	0.624922	S001_T0__S163_T0	FALSE	S163	S001	FALSE	Pre-travel	Pre-travel	TRUE	Northern Africa	Southeastern Asia	FALSE
S078_T1	S001_T0	0.695131	S001_T0__S078_T1	FALSE	S078	S001	FALSE	Post-travel	Pre-travel	FALSE	Eastern Africa	Southeastern Asia	FALSE
S058_T1	S001_T0	0.761321	S001_T0__S058_T1	FALSE	S058	S001	FALSE	Post-travel	Pre-travel	FALSE	Southern Asia	Southeastern Asia	FALSE
S063_T0	S001_T0	0.936711	S001_T0__S063_T0	FALSE	S063	S001	FALSE	Pre-travel	Pre-travel	TRUE	Southeastern Asia	Southeastern Asia	TRUE
S113_T0	S001_T0	0.784156	S001_T0__S113_T0	FALSE	S113	S001	FALSE	Pre-travel	Pre-travel	TRUE	Eastern Africa	Southeastern Asia	FALSE
S135_T0	S001_T0	0.649086	S001_T0__S135_T0	FALSE	S135	S001	FALSE	Pre-travel	Pre-travel	TRUE	Southern Asia	Southeastern Asia	FALSE
S124_T1	S001_T0	0.713804	S001_T0__S124_T1	FALSE	S124	S001	FALSE	Post-travel	Pre-travel	FALSE	Southeastern Asia	Southeastern Asia	TRUE
S070_T0	S001_T0	0.828612	S001_T0__S070_T0	FALSE	S070	S001	FALSE	Pre-travel	Pre-travel	TRUE	Southern Asia	Southeastern Asia	FALSE
S061_T1	S001_T0	0.949767	S001_T0__S061_T1	FALSE	S061	S001	FALSE	Post-travel	Pre-travel	FALSE	Southeastern Asia	Southeastern Asia	TRUE
S091_T1	S001_T0	0.560073	S001_T0__S091_T1	FALSE	S091	S001	FALSE	Post-travel	Pre-travel	FALSE	Eastern Africa	Southeastern Asia	FALSE
S025_T1	S001_T0	0.818909	S001_T0__S025_T1	FALSE	S025	S001	FALSE	Post-travel	Pre-travel	FALSE	Southern Asia	Southeastern Asia	FALSE
S141_T1	S001_T0	0.912807	S001_T0__S141_T1	FALSE	S141	S001	FALSE	Post-travel	Pre-travel	FALSE	Eastern Africa	Southeastern Asia	FALSE
S190_T0	S001_T0	0.615761	S001_T0__S190_T0	FALSE	S190	S001	FALSE	Pre-travel	Pre-travel	TRUE	Eastern Africa	Southeastern Asia	FALSE
S044_T0	S001_T0	0.85958	S001_T0__S044_T0	FALSE	S044	S001	FALSE	Pre-travel	Pre-travel	TRUE	Southeastern Asia	Southeastern Asia	TRUE
S016_T1	S001_T0	0.722508	S001_T0__S016_T1	FALSE	S016	S001	FALSE	Post-travel	Pre-travel	FALSE	Northern Africa	Southeastern Asia	FALSE
S009_T0	S001_T0	0.724815	S001_T0__S009_T0	FALSE	S009	S001	FALSE	Pre-travel	Pre-travel	TRUE	Northern Africa	Southeastern Asia	FALSE
S033_T1	S001_T0	0.698981	S001_T0__S033_T1	FALSE	S033	S001	FALSE	Post-travel	Pre-travel	FALSE	Southern Asia	Southeastern Asia	FALSE
S067_T0	S001_T0	0.672489	S001_T0__S067_T0	FALSE	S067	S001	FALSE	Pre-travel	Pre-travel	TRUE	Eastern Africa	Southeastern Asia	FALSE
S123_T0	S001_T0	0.69037	S001_T0__S123_T0	FALSE	S123	S001	FALSE	Pre-travel	Pre-travel	TRUE	Eastern Africa	Southeastern Asia	FALSE
S032_T0	S001_T0	0.805338	S001_T0__S032_T0	FALSE	S032	S001	FALSE	Pre-travel	Pre-travel	TRUE	Southeastern Asia	Southeastern Asia	TRUE
S147_T0	S001_T0	0.646136	S001_T0__S147_T0	FALSE	S147	S001	FALSE	Pre-travel	Pre-travel	TRUE	Southern Asia	Southeastern Asia	FALSE
S039_T1	S001_T0	0.89166	S001_T0__S039_T1	FALSE	S039	S001	FALSE	Post-travel	Pre-travel	FALSE	Northern Africa	Southeastern Asia	FALSE
S179_T0	S001_T0	0.404693	S001_T0__S179_T0	FALSE	S179	S001	FALSE	Pre-travel	Pre-travel	TRUE	Southeastern Asia	Southeastern Asia	TRUE
S029_T0	S001_T0	0.893188	S001_T0__S029_T0	FALSE	S029	S001	FALSE	Pre-travel	Pre-travel	TRUE	Eastern Africa	Southeastern Asia	FALSE
S099_T1	S001_T0	0.873512	S001_T0__S099_T1	FALSE	S099	S001	FALSE	Post-travel	Pre-travel	FALSE	Southern Asia	Southeastern Asia	FALSE
S103_T0	S001_T0	0.78513	S001_T0__S103_T0	FALSE	S103	S001	FALSE	Pre-travel	Pre-travel	TRUE	Northern Africa	Southeastern Asia	FALSE
S034_T1	S001_T0	0.802002	S001_T0__S034_T1	FALSE	S034	S001	FALSE	Post-travel	Pre-travel	FALSE	Southern Asia	Southeastern Asia	FALSE
S105_T1	S001_T0	0.718926	S001_T0__S105_T1	FALSE	S105	S001	FALSE	Post-travel	Pre-travel	FALSE	Eastern Africa	Southeastern Asia	FALSE
S118_T1	S001_T0	0.776986	S001_T0__S118_T1	FALSE	S118	S001	FALSE	Post-travel	Pre-travel	FALSE	Southern Asia	Southeastern Asia	FALSE
S134_T1	S001_T0	0.620449	S001_T0__S134_T1	FALSE	S134	S001	FALSE	Post-travel	Pre-travel	FALSE	Southeastern Asia	Southeastern Asia	TRUE
S106_T1	S001_T0	0.61436	S001_T0__S106_T1	FALSE	S106	S001	FALSE	Post-travel	Pre-travel	FALSE	Southeastern Asia	Southeastern Asia	TRUE
S052_T0	S001_T0	0.803261	S001_T0__S052_T0	FALSE	S052	S001	FALSE	Pre-travel	Pre-travel	TRUE	Southeastern Asia	Southeastern Asia	TRUE
S168_T0	S001_T0	0.838047	S001_T0__S168_T0	FALSE	S168	S001	FALSE	Pre-travel	Pre-travel	TRUE	Southern Asia	Southeastern Asia	FALSE
S180_T0	S001_T0	0.510104	S001_T0__S180_T0	FALSE	S180	S001	FALSE	Pre-travel	Pre-travel	TRUE	Southern Asia	Southeastern Asia	FALSE
S037_T1	S001_T0	0.474666	S001_T0__S037_T1	FALSE	S037	S001	FALSE	Post-travel	Pre-travel	FALSE	Southeastern Asia	Southeastern Asia	TRUE
S060_T0	S001_T0	0.719252	S001_T0__S060_T0	FALSE	S060	S001	FALSE	Pre-travel	Pre-travel	TRUE	Eastern Africa	Southeastern Asia	FALSE
S156_T1	S001_T0	0.866105	S001_T0__S156_T1	FALSE	S156	S001	FALSE	Post-travel	Pre-travel	FALSE	Southeastern Asia	Southeastern Asia	TRUE
S163_T1	S001_T0	0.726485	S001_T0__S163_T1	FALSE	S163	S001	FALSE	Post-travel	Pre-travel	FALSE	Northern Africa	Southeastern Asia	FALSE
S048_T0	S001_T0	0.669178	S001_T0__S048_T0	FALSE	S048	S001	FALSE	Pre-travel	Pre-travel	TRUE	Northern Africa	Southeastern Asia	FALSE
S035_T0	S001_T0	0.519761	S001_T0__S035_T0	FALSE	S035	S001	FALSE	Pre-travel	Pre-travel	TRUE	Eastern Africa	Southeastern Asia	FALSE
S100_T1	S001_T0	0.92032	S001_T0__S100_T1	FALSE	S100	S001	FALSE	Post-travel	Pre-travel	FALSE	Southern Asia	Southeastern Asia	FALSE
S166_T0	S001_T0	0.707333	S001_T0__S166_T0	FALSE	S166	S001	FALSE	Pre-travel	Pre-travel	TRUE	Southern Asia	Southeastern Asia	FALSE
S009_T1	S001_T0	0.56294	S001_T0__S009_T1	FALSE	S009	S001	FALSE	Post-travel	Pre-travel	FALSE	Northern Africa	Southeastern Asia	FALSE
S168_T1	S001_T0	0.688612	S001_T0__S168_T1	FALSE	S168	S001	FALSE	Post-travel	Pre-travel	FALSE	Southern Asia	Southeastern Asia	FALSE
S082_T0	S001_T0	0.745912	S001_T0__S082_T0	FALSE	S082	S001	FALSE	Pre-travel	Pre-travel	TRUE	Northern Africa	Southeastern Asia	FALSE
S080_T1	S001_T0	0.576262	S001_T0__S080_T1	FALSE	S080	S001	FALSE	Post-travel	Pre-travel	FALSE	Southeastern Asia	Southeastern Asia	TRUE
S149_T1	S001_T0	0.861606	S001_T0__S149_T1	FALSE	S149	S001	FALSE	Post-travel	Pre-travel	FALSE	Eastern Africa	Southeastern Asia	FALSE
S021_T1	S001_T0	0.822183	S001_T0__S021_T1	FALSE	S021	S001	FALSE	Post-travel	Pre-travel	FALSE	Northern Africa	Southeastern Asia	FALSE
S189_T1	S001_T0	0.572426	S001_T0__S189_T1	FALSE	S189	S001	FALSE	Post-travel	Pre-travel	FALSE	Northern Africa	Southeastern Asia	FALSE
S042_T0	S001_T0	0.763407	S001_T0__S042_T0	FALSE	S042	S001	FALSE	Pre-travel	Pre-travel	TRUE	Eastern Africa	Southeastern Asia	FALSE
S184_T1	S001_T0	0.699149	S001_T0__S184_T1	FALSE	S184	S001	FALSE	Post-travel	Pre-travel	FALSE	Northern Africa	Southeastern Asia	FALSE
S090_T1	S001_T0	0.822583	S001_T0__S090_T1	FALSE	S090	S001	FALSE	Post-travel	Pre-travel	FALSE	Eastern Africa	Southeastern Asia	FALSE
S018_T1	S001_T0	0.443563	S001_T0__S018_T1	FALSE	S018	S001	FALSE	Post-travel	Pre-travel	FALSE	Eastern Africa	Southeastern Asia	FALSE
S092_T0	S001_T0	0.867486	S001_T0__S092_T0	FALSE	S092	S001	FALSE	Pre-travel	Pre-travel	TRUE	Northern Africa	Southeastern Asia	FALSE
S027_T0	S001_T0	0.461909	S001_T0__S027_T0	FALSE	S027	S001	FALSE	Pre-travel	Pre-travel	TRUE	Eastern Africa	Southeastern Asia	FALSE
S116_T0	S001_T0	0.635136	S001_T0__S116_T0	FALSE	S116	S001	FALSE	Pre-travel	Pre-travel	TRUE	Southeastern Asia	Southeastern Asia	TRUE
S063_T1	S001_T0	0.737614	S001_T0__S063_T1	FALSE	S063	S001	FALSE	Post-travel	Pre-travel	FALSE	Southeastern Asia	Southeastern Asia	TRUE
S109_T0	S001_T0	0.699273	S001_T0__S109_T0	FALSE	S109	S001	FALSE	Pre-travel	Pre-travel	TRUE	Southern Asia	Southeastern Asia	FALSE
S040_T1	S001_T0	0.812134	S001_T0__S040_T1	FALSE	S040	S001	FALSE	Post-travel	Pre-travel	FALSE	Northern Africa	Southeastern Asia	FALSE
S011_T0	S001_T0	0.698318	S001_T0__S011_T0	FALSE	S011	S001	FALSE	Pre-travel	Pre-travel	TRUE	Southeastern Asia	Southeastern Asia	TRUE
S081_T0	S001_T0	0.556964	S001_T0__S081_T0	FALSE	S081	S001	FALSE	Pre-travel	Pre-travel	TRUE	Southeastern Asia	Southeastern Asia	TRUE
S152_T1	S001_T0	0.863724	S001_T0__S152_T1	FALSE	S152	S001	FALSE	Post-travel	Pre-travel	FALSE	Eastern Africa	Southeastern Asia	FALSE
S184_T0	S001_T0	0.734159	S001_T0__S184_T0	FALSE	S184	S001	FALSE	Pre-travel	Pre-travel	TRUE	Northern Africa	Southeastern Asia	FALSE
S010_T0	S001_T0	0.750487	S001_T0__S010_T0	FALSE	S010	S001	FALSE	Pre-travel	Pre-travel	TRUE	Eastern Africa	Southeastern Asia	FALSE
S141_T0	S001_T0	0.707195	S001_T0__S141_T0	FALSE	S141	S001	FALSE	Pre-travel	Pre-travel	TRUE	Eastern Africa	Southeastern Asia	FALSE
S068_T1	S001_T0	0.820906	S001_T0__S068_T1	FALSE	S068	S001	FALSE	Post-travel	Pre-travel	FALSE	Eastern Africa	Southeastern Asia	FALSE
S188_T1	S001_T0	0.609997	S001_T0__S188_T1	FALSE	S188	S001	FALSE	Post-travel	Pre-travel	FALSE	Northern Africa	Southeastern Asia	FALSE
S043_T0	S001_T0	0.655805	S001_T0__S043_T0	FALSE	S043	S001	FALSE	Pre-travel	Pre-travel	TRUE	Southeastern Asia	Southeastern Asia	TRUE
S074_T0	S001_T0	0.68873	S001_T0__S074_T0	FALSE	S074	S001	FALSE	Pre-travel	Pre-travel	TRUE	Northern Africa	Southeastern Asia	FALSE
S073_T1	S001_T0	0.718928	S001_T0__S073_T1	FALSE	S073	S001	FALSE	Post-travel	Pre-travel	FALSE	Eastern Africa	Southeastern Asia	FALSE
S176_T0	S001_T0	0.815768	S001_T0__S176_T0	FALSE	S176	S001	FALSE	Pre-travel	Pre-travel	TRUE	Northern Africa	Southeastern Asia	FALSE
S030_T1	S001_T0	0.894396	S001_T0__S030_T1	FALSE	S030	S001	FALSE	Post-travel	Pre-travel	FALSE	Southeastern Asia	Southeastern Asia	TRUE
S114_T0	S001_T0	0.927879	S001_T0__S114_T0	FALSE	S114	S001	FALSE	Pre-travel	Pre-travel	TRUE	Eastern Africa	Southeastern Asia	FALSE
S022_T0	S001_T0	0.867645	S001_T0__S022_T0	FALSE	S022	S001	FALSE	Pre-travel	Pre-travel	TRUE	Northern Africa	Southeastern Asia	FALSE
S180_T1	S001_T0	0.466933	S001_T0__S180_T1	FALSE	S180	S001	FALSE	Post-travel	Pre-travel	FALSE	Southern Asia	Southeastern Asia	FALSE
S083_T1	S001_T0	0.738584	S001_T0__S083_T1	FALSE	S083	S001	FALSE	Post-travel	Pre-travel	FALSE	Northern Africa	Southeastern Asia	FALSE
S136_T0	S001_T0	0.801531	S001_T0__S136_T0	FALSE	S136	S001	FALSE	Pre-travel	Pre-travel	TRUE	Southern Asia	Southeastern Asia	FALSE
S183_T0	S001_T0	0.674043	S001_T0__S183_T0	FALSE	S183	S001	FALSE	Pre-travel	Pre-travel	TRUE	Southern Asia	Southeastern Asia	FALSE
S029_T1	S001_T0	0.778172	S001_T0__S029_T1	FALSE	S029	S001	FALSE	Post-travel	Pre-travel	FALSE	Eastern Africa	Southeastern Asia	FALSE
S026_T1	S001_T0	0.913991	S001_T0__S026_T1	FALSE	S026	S001	FALSE	Post-travel	Pre-travel	FALSE	Southeastern Asia	Southeastern Asia	TRUE
S183_T1	S001_T0	0.888205	S001_T0__S183_T1	FALSE	S183	S001	FALSE	Post-travel	Pre-travel	FALSE	Southern Asia	Southeastern Asia	FALSE
S142_T1	S001_T0	0.846337	S001_T0__S142_T1	FALSE	S142	S001	FALSE	Post-travel	Pre-travel	FALSE	Eastern Africa	Southeastern Asia	FALSE
S010_T1	S001_T0	0.764815	S001_T0__S010_T1	FALSE	S010	S001	FALSE	Post-travel	Pre-travel	FALSE	Eastern Africa	Southeastern Asia	FALSE
S072_T1	S001_T0	0.752232	S001_T0__S072_T1	FALSE	S072	S001	FALSE	Post-travel	Pre-travel	FALSE	Eastern Africa	Southeastern Asia	FALSE
S020_T1	S001_T0	0.9333	S001_T0__S020_T1	FALSE	S020	S001	FALSE	Post-travel	Pre-travel	FALSE	Southeastern Asia	Southeastern Asia	TRUE
S129_T1	S001_T0	0.667663	S001_T0__S129_T1	FALSE	S129	S001	FALSE	Post-travel	Pre-travel	FALSE	Eastern Africa	Southeastern Asia	FALSE
S121_T1	S001_T0	0.855709	S001_T0__S121_T1	FALSE	S121	S001	FALSE	Post-travel	Pre-travel	FALSE	Eastern Africa	Southeastern Asia	FALSE
S160_T1	S001_T0	0.852235	S001_T0__S160_T1	FALSE	S160	S001	FALSE	Post-travel	Pre-travel	FALSE	Southeastern Asia	Southeastern Asia	TRUE
S186_T0	S001_T0	0.693474	S001_T0__S186_T0	FALSE	S186	S001	FALSE	Pre-travel	Pre-travel	TRUE	Southern Asia	Southeastern Asia	FALSE
S040_T0	S001_T0	0.651908	S001_T0__S040_T0	FALSE	S040	S001	FALSE	Pre-travel	Pre-travel	TRUE	Northern Africa	Southeastern Asia	FALSE
S185_T0	S001_T0	0.540514	S001_T0__S185_T0	FALSE	S185	S001	FALSE	Pre-travel	Pre-travel	TRUE	Southeastern Asia	Southeastern Asia	TRUE
S057_T0	S001_T0	0.669514	S001_T0__S057_T0	FALSE	S057	S001	FALSE	Pre-travel	Pre-travel	TRUE	Southern Asia	Southeastern Asia	FALSE
S188_T0	S001_T0	0.893323	S001_T0__S188_T0	FALSE	S188	S001	FALSE	Pre-travel	Pre-travel	TRUE	Northern Africa	Southeastern Asia	FALSE
S094_T1	S001_T0	0.727869	S001_T0__S094_T1	FALSE	S094	S001	FALSE	Post-travel	Pre-travel	FALSE	Northern Africa	Southeastern Asia	FALSE
S045_T0	S001_T0	0.748257	S001_T0__S045_T0	FALSE	S045	S001	FALSE	Pre-travel	Pre-travel	TRUE	Southern Asia	Southeastern Asia	FALSE
S085_T1	S001_T0	0.672549	S001_T0__S085_T1	FALSE	S085	S001	FALSE	Post-travel	Pre-travel	FALSE	Southern Asia	Southeastern Asia	FALSE
S167_T0	S001_T0	0.798676	S001_T0__S167_T0	FALSE	S167	S001	FALSE	Pre-travel	Pre-travel	TRUE	Eastern Africa	Southeastern Asia	FALSE
S086_T1	S001_T0	0.746369	S001_T0__S086_T1	FALSE	S086	S001	FALSE	Post-travel	Pre-travel	FALSE	Northern Africa	Southeastern Asia	FALSE
S032_T1	S001_T0	0.795986	S001_T0__S032_T1	FALSE	S032	S001	FALSE	Post-travel	Pre-travel	FALSE	Southeastern Asia	Southeastern Asia	TRUE
S159_T1	S001_T0	0.854144	S001_T0__S159_T1	FALSE	S159	S001	FALSE	Post-travel	Pre-travel	FALSE	Southern Asia	Southeastern Asia	FALSE
S017_T1	S001_T0	0.920092	S001_T0__S017_T1	FALSE	S017	S001	FALSE	Post-travel	Pre-travel	FALSE	Southern Asia	Southeastern Asia	FALSE
S185_T1	S001_T0	0.714598	S001_T0__S185_T1	FALSE	S185	S001	FALSE	Post-travel	Pre-travel	FALSE	Southeastern Asia	Southeastern Asia	TRUE
S081_T1	S001_T0	0.550201	S001_T0__S081_T1	FALSE	S081	S001	FALSE	Post-travel	Pre-travel	FALSE	Southeastern Asia	Southeastern Asia	TRUE
S126_T1	S001_T0	0.624421	S001_T0__S126_T1	FALSE	S126	S001	FALSE	Post-travel	Pre-travel	FALSE	Southeastern Asia	Southeastern Asia	TRUE
S120_T0	S001_T0	0.803759	S001_T0__S120_T0	FALSE	S120	S001	FALSE	Pre-travel	Pre-travel	TRUE	Southern Asia	Southeastern Asia	FALSE
S138_T1	S001_T0	0.81853	S001_T0__S138_T1	FALSE	S138	S001	FALSE	Post-travel	Pre-travel	FALSE	Southern Asia	Southeastern Asia	FALSE
S098_T0	S001_T0	0.620614	S001_T0__S098_T0	FALSE	S098	S001	FALSE	Pre-travel	Pre-travel	TRUE	Eastern Africa	Southeastern Asia	FALSE
S110_T1	S001_T0	0.861057	S001_T0__S110_T1	FALSE	S110	S001	FALSE	Post-travel	Pre-travel	FALSE	Southeastern Asia	Southeastern Asia	TRUE
S139_T1	S001_T0	0.89923	S001_T0__S139_T1	FALSE	S139	S001	FALSE	Post-travel	Pre-travel	FALSE	Southeastern Asia	Southeastern Asia	TRUE
S011_T1	S001_T0	0.724489	S001_T0__S011_T1	FALSE	S011	S001	FALSE	Post-travel	Pre-travel	FALSE	Southeastern Asia	Southeastern Asia	TRUE
S144_T0	S001_T0	0.877248	S001_T0__S144_T0	FALSE	S144	S001	FALSE	Pre-travel	Pre-travel	TRUE	Eastern Africa	Southeastern Asia	FALSE
S175_T1	S001_T0	0.693453	S001_T0__S175_T1	FALSE	S175	S001	FALSE	Post-travel	Pre-travel	FALSE	Northern Africa	Southeastern Asia	FALSE
S125_T1	S001_T0	0.658562	S001_T0__S125_T1	FALSE	S125	S001	FALSE	Post-travel	Pre-travel	FALSE	Southern Asia	Southeastern Asia	FALSE
S064_T1	S001_T0	0.579475	S001_T0__S064_T1	FALSE	S064	S001	FALSE	Post-travel	Pre-travel	FALSE	Southeastern Asia	Southeastern Asia	TRUE
S124_T0	S001_T0	0.776984	S001_T0__S124_T0	FALSE	S124	S001	FALSE	Pre-travel	Pre-travel	TRUE	Southeastern Asia	Southeastern Asia	TRUE
S093_T0	S001_T0	0.858585	S001_T0__S093_T0	FALSE	S093	S001	FALSE	Pre-travel	Pre-travel	TRUE	Northern Africa	Southeastern Asia	FALSE
S054_T1	S001_T0	0.640631	S001_T0__S054_T1	FALSE	S054	S001	FALSE	Post-travel	Pre-travel	FALSE	Northern Africa	Southeastern Asia	FALSE
S094_T0	S001_T0	0.815176	S001_T0__S094_T0	FALSE	S094	S001	FALSE	Pre-travel	Pre-travel	TRUE	Northern Africa	Southeastern Asia	FALSE
S181_T1	S001_T0	0.653736	S001_T0__S181_T1	FALSE	S181	S001	FALSE	Post-travel	Pre-travel	FALSE	Southern Asia	Southeastern Asia	FALSE
S013_T0	S001_T0	0.803544	S001_T0__S013_T0	FALSE	S013	S001	FALSE	Pre-travel	Pre-travel	TRUE	Eastern Africa	Southeastern Asia	FALSE
S049_T0	S001_T0	0.814963	S001_T0__S049_T0	FALSE	S049	S001	FALSE	Pre-travel	Pre-travel	TRUE	Northern Africa	Southeastern Asia	FALSE
S165_T0	S001_T0	0.79653	S001_T0__S165_T0	FALSE	S165	S001	FALSE	Pre-travel	Pre-travel	TRUE	Southern Asia	Southeastern Asia	FALSE
S111_T1	S001_T0	0.702178	S001_T0__S111_T1	FALSE	S111	S001	FALSE	Post-travel	Pre-travel	FALSE	Northern Africa	Southeastern Asia	FALSE
S122_T1	S001_T0	0.825665	S001_T0__S122_T1	FALSE	S122	S001	FALSE	Post-travel	Pre-travel	FALSE	Southeastern Asia	Southeastern Asia	TRUE
S066_T0	S001_T0	0.832806	S001_T0__S066_T0	FALSE	S066	S001	FALSE	Pre-travel	Pre-travel	TRUE	Eastern Africa	Southeastern Asia	FALSE
S042_T1	S001_T0	0.922512	S001_T0__S042_T1	FALSE	S042	S001	FALSE	Post-travel	Pre-travel	FALSE	Eastern Africa	Southeastern Asia	FALSE
S119_T1	S001_T0	0.854564	S001_T0__S119_T1	FALSE	S119	S001	FALSE	Post-travel	Pre-travel	FALSE	Southeastern Asia	Southeastern Asia	TRUE
S147_T1	S001_T0	0.802	S001_T0__S147_T1	FALSE	S147	S001	FALSE	Post-travel	Pre-travel	FALSE	Southern Asia	Southeastern Asia	FALSE
S162_T0	S001_T0	0.765062	S001_T0__S162_T0	FALSE	S162	S001	FALSE	Pre-travel	Pre-travel	TRUE	Northern Africa	Southeastern Asia	FALSE
S189_T0	S001_T0	0.454999	S001_T0__S189_T0	FALSE	S189	S001	FALSE	Pre-travel	Pre-travel	TRUE	Northern Africa	Southeastern Asia	FALSE
S044_T1	S001_T0	0.865672	S001_T0__S044_T1	FALSE	S044	S001	FALSE	Post-travel	Pre-travel	FALSE	Southeastern Asia	Southeastern Asia	TRUE
S031_T0	S001_T0	0.881686	S001_T0__S031_T0	FALSE	S031	S001	FALSE	Pre-travel	Pre-travel	TRUE	Southern Asia	Southeastern Asia	FALSE
S164_T1	S001_T0	0.70862	S001_T0__S164_T1	FALSE	S164	S001	FALSE	Post-travel	Pre-travel	FALSE	Southeastern Asia	Southeastern Asia	TRUE
S137_T1	S001_T0	0.860553	S001_T0__S137_T1	FALSE	S137	S001	FALSE	Post-travel	Pre-travel	FALSE	Southern Asia	Southeastern Asia	FALSE
S012_T0	S001_T0	0.910949	S001_T0__S012_T0	FALSE	S012	S001	FALSE	Pre-travel	Pre-travel	TRUE	Eastern Africa	Southeastern Asia	FALSE
S071_T1	S001_T0	0.784283	S001_T0__S071_T1	FALSE	S071	S001	FALSE	Post-travel	Pre-travel	FALSE	Southeastern Asia	Southeastern Asia	TRUE
S140_T0	S001_T0	0.521564	S001_T0__S140_T0	FALSE	S140	S001	FALSE	Pre-travel	Pre-travel	TRUE	Southeastern Asia	Southeastern Asia	TRUE
S187_T0	S001_T0	0.879875	S001_T0__S187_T0	FALSE	S187	S001	FALSE	Pre-travel	Pre-travel	TRUE	Eastern Africa	Southeastern Asia	FALSE
S127_T0	S001_T0	0.705043	S001_T0__S127_T0	FALSE	S127	S001	FALSE	Pre-travel	Pre-travel	TRUE	Southeastern Asia	Southeastern Asia	TRUE
S112_T1	S001_T0	0.642764	S001_T0__S112_T1	FALSE	S112	S001	FALSE	Post-travel	Pre-travel	FALSE	Northern Africa	Southeastern Asia	FALSE
S131_T0	S001_T0	0.686073	S001_T0__S131_T0	FALSE	S131	S001	FALSE	Pre-travel	Pre-travel	TRUE	Northern Africa	Southeastern Asia	FALSE
S058_T0	S001_T0	0.831087	S001_T0__S058_T0	FALSE	S058	S001	FALSE	Pre-travel	Pre-travel	TRUE	Southern Asia	Southeastern Asia	FALSE
S048_T1	S001_T0	0.87146	S001_T0__S048_T1	FALSE	S048	S001	FALSE	Post-travel	Pre-travel	FALSE	Northern Africa	Southeastern Asia	FALSE
S023_T0	S001_T0	0.70558	S001_T0__S023_T0	FALSE	S023	S001	FALSE	Pre-travel	Pre-travel	TRUE	Southern Asia	Southeastern Asia	FALSE
S181_T0	S001_T0	0.666304	S001_T0__S181_T0	FALSE	S181	S001	FALSE	Pre-travel	Pre-travel	TRUE	Southern Asia	Southeastern Asia	FALSE
S052_T1	S001_T0	0.800721	S001_T0__S052_T1	FALSE	S052	S001	FALSE	Post-travel	Pre-travel	FALSE	Southeastern Asia	Southeastern Asia	TRUE
S053_T0	S001_T0	0.90459	S001_T0__S053_T0	FALSE	S053	S001	FALSE	Pre-travel	Pre-travel	TRUE	Northern Africa	Southeastern Asia	FALSE
S118_T0	S001_T0	0.776059	S001_T0__S118_T0	FALSE	S118	S001	FALSE	Pre-travel	Pre-travel	TRUE	Southern Asia	Southeastern Asia	FALSE
S065_T0	S001_T0	0.678614	S001_T0__S065_T0	FALSE	S065	S001	FALSE	Pre-travel	Pre-travel	TRUE	Eastern Africa	Southeastern Asia	FALSE
S073_T0	S001_T0	0.76397	S001_T0__S073_T0	FALSE	S073	S001	FALSE	Pre-travel	Pre-travel	TRUE	Eastern Africa	Southeastern Asia	FALSE
S043_T1	S001_T0	0.783015	S001_T0__S043_T1	FALSE	S043	S001	FALSE	Post-travel	Pre-travel	FALSE	Southeastern Asia	Southeastern Asia	TRUE
S086_T0	S001_T0	0.736787	S001_T0__S086_T0	FALSE	S086	S001	FALSE	Pre-travel	Pre-travel	TRUE	Northern Africa	Southeastern Asia	FALSE
S075_T1	S001_T0	0.580277	S001_T0__S075_T1	FALSE	S075	S001	FALSE	Post-travel	Pre-travel	FALSE	Northern Africa	Southeastern Asia	FALSE
S157_T0	S001_T0	0.814184	S001_T0__S157_T0	FALSE	S157	S001	FALSE	Pre-travel	Pre-travel	TRUE	Southeastern Asia	Southeastern Asia	TRUE
S159_T0	S001_T0	0.763813	S001_T0__S159_T0	FALSE	S159	S001	FALSE	Pre-travel	Pre-travel	TRUE	Southern Asia	Southeastern Asia	FALSE
S116_T1	S001_T0	0.833104	S001_T0__S116_T1	FALSE	S116	S001	FALSE	Post-travel	Pre-travel	FALSE	Southeastern Asia	Southeastern Asia	TRUE
S054_T0	S001_T0	0.550443	S001_T0__S054_T0	FALSE	S054	S001	FALSE	Pre-travel	Pre-travel	TRUE	Northern Africa	Southeastern Asia	FALSE
S012_T1	S001_T0	0.903821	S001_T0__S012_T1	FALSE	S012	S001	FALSE	Post-travel	Pre-travel	FALSE	Eastern Africa	Southeastern Asia	FALSE
S167_T1	S001_T0	0.734279	S001_T0__S167_T1	FALSE	S167	S001	FALSE	Post-travel	Pre-travel	FALSE	Eastern Africa	Southeastern Asia	FALSE
S067_T1	S001_T0	0.722294	S001_T0__S067_T1	FALSE	S067	S001	FALSE	Post-travel	Pre-travel	FALSE	Eastern Africa	Southeastern Asia	FALSE
S173_T1	S001_T0	0.891296	S001_T0__S173_T1	FALSE	S173	S001	FALSE	Post-travel	Pre-travel	FALSE	Southeastern Asia	Southeastern Asia	TRUE
S138_T0	S001_T0	0.785686	S001_T0__S138_T0	FALSE	S138	S001	FALSE	Pre-travel	Pre-travel	TRUE	Southern Asia	Southeastern Asia	FALSE
S079_T0	S001_T0	0.683903	S001_T0__S079_T0	FALSE	S079	S001	FALSE	Pre-travel	Pre-travel	TRUE	Southern Asia	Southeastern Asia	FALSE
S057_T1	S001_T0	0.551831	S001_T0__S057_T1	FALSE	S057	S001	FALSE	Post-travel	Pre-travel	FALSE	Southern Asia	Southeastern Asia	FALSE
S064_T0	S001_T0	0.94506	S001_T0__S064_T0	FALSE	S064	S001	FALSE	Pre-travel	Pre-travel	TRUE	Southeastern Asia	Southeastern Asia	TRUE
S077_T0	S001_T0	0.732125	S001_T0__S077_T0	FALSE	S077	S001	FALSE	Pre-travel	Pre-travel	TRUE	Eastern Africa	Southeastern Asia	FALSE
S133_T0	S001_T0	0.607805	S001_T0__S133_T0	FALSE	S133	S001	FALSE	Pre-travel	Pre-travel	TRUE	Southeastern Asia	Southeastern Asia	TRUE
S121_T0	S001_T0	0.508666	S001_T0__S121_T0	FALSE	S121	S001	FALSE	Pre-travel	Pre-travel	TRUE	Eastern Africa	Southeastern Asia	FALSE
S179_T1	S001_T0	0.85161	S001_T0__S179_T1	FALSE	S179	S001	FALSE	Post-travel	Pre-travel	FALSE	Southeastern Asia	Southeastern Asia	TRUE
S038_T0	S001_T0	0.56888	S001_T0__S038_T0	FALSE	S038	S001	FALSE	Pre-travel	Pre-travel	TRUE	Southeastern Asia	Southeastern Asia	TRUE
S148_T0	S001_T0	0.902617	S001_T0__S148_T0	FALSE	S148	S001	FALSE	Pre-travel	Pre-travel	TRUE	Northern Africa	Southeastern Asia	FALSE
S107_T0	S001_T0	0.616277	S001_T0__S107_T0	FALSE	S107	S001	FALSE	Pre-travel	Pre-travel	TRUE	Southern Asia	Southeastern Asia	FALSE
S099_T0	S001_T0	0.921296	S001_T0__S099_T0	FALSE	S099	S001	FALSE	Pre-travel	Pre-travel	TRUE	Southern Asia	Southeastern Asia	FALSE
S036_T0	S001_T0	0.908514	S001_T0__S036_T0	FALSE	S036	S001	FALSE	Pre-travel	Pre-travel	TRUE	Southeastern Asia	Southeastern Asia	TRUE
S056_T0	S001_T0	0.742993	S001_T0__S056_T0	FALSE	S056	S001	FALSE	Pre-travel	Pre-travel	TRUE	Southern Asia	Southeastern Asia	FALSE
S079_T1	S001_T0	0.603	S001_T0__S079_T1	FALSE	S079	S001	FALSE	Post-travel	Pre-travel	FALSE	Southern Asia	Southeastern Asia	FALSE
S095_T1	S001_T0	0.632152	S001_T0__S095_T1	FALSE	S095	S001	FALSE	Post-travel	Pre-travel	FALSE	Northern Africa	Southeastern Asia	FALSE
S096_T1	S001_T0	0.716158	S001_T0__S096_T1	FALSE	S096	S001	FALSE	Post-travel	Pre-travel	FALSE	Eastern Africa	Southeastern Asia	FALSE
S132_T1	S001_T0	0.417627	S001_T0__S132_T1	FALSE	S132	S001	FALSE	Post-travel	Pre-travel	FALSE	Northern Africa	Southeastern Asia	FALSE
S145_T0	S001_T0	0.671127	S001_T0__S145_T0	FALSE	S145	S001	FALSE	Pre-travel	Pre-travel	TRUE	Northern Africa	Southeastern Asia	FALSE
S051_T0	S001_T0	0.74914	S001_T0__S051_T0	FALSE	S051	S001	FALSE	Pre-travel	Pre-travel	TRUE	Southern Asia	Southeastern Asia	FALSE
S036_T1	S001_T0	0.864455	S001_T0__S036_T1	FALSE	S036	S001	FALSE	Post-travel	Pre-travel	FALSE	Southeastern Asia	Southeastern Asia	TRUE
S047_T0	S001_T0	0.771972	S001_T0__S047_T0	FALSE	S047	S001	FALSE	Pre-travel	Pre-travel	TRUE	Southern Asia	Southeastern Asia	FALSE
S150_T0	S001_T0	0.927827	S001_T0__S150_T0	FALSE	S150	S001	FALSE	Pre-travel	Pre-travel	TRUE	Northern Africa	Southeastern Asia	FALSE
S101_T1	S001_T0	0.743563	S001_T0__S101_T1	FALSE	S101	S001	FALSE	Post-travel	Pre-travel	FALSE	Southeastern Asia	Southeastern Asia	TRUE
S151_T1	S001_T0	0.720101	S001_T0__S151_T1	FALSE	S151	S001	FALSE	Post-travel	Pre-travel	FALSE	Southern Asia	Southeastern Asia	FALSE
S178_T1	S001_T0	0.642077	S001_T0__S178_T1	FALSE	S178	S001	FALSE	Post-travel	Pre-travel	FALSE	Eastern Africa	Southeastern Asia	FALSE
S127_T1	S001_T0	0.776475	S001_T0__S127_T1	FALSE	S127	S001	FALSE	Post-travel	Pre-travel	FALSE	Southeastern Asia	Southeastern Asia	TRUE
S095_T0	S001_T0	0.675816	S001_T0__S095_T0	FALSE	S095	S001	FALSE	Pre-travel	Pre-travel	TRUE	Northern Africa	Southeastern Asia	FALSE
S027_T1	S001_T0	0.558467	S001_T0__S027_T1	FALSE	S027	S001	FALSE	Post-travel	Pre-travel	FALSE	Eastern Africa	Southeastern Asia	FALSE
S033_T0	S001_T0	0.795804	S001_T0__S033_T0	FALSE	S033	S001	FALSE	Pre-travel	Pre-travel	TRUE	Southern Asia	Southeastern Asia	FALSE
S016_T0	S001_T0	0.651653	S001_T0__S016_T0	FALSE	S016	S001	FALSE	Pre-travel	Pre-travel	TRUE	Northern Africa	Southeastern Asia	FALSE
S165_T1	S001_T0	0.752308	S001_T0__S165_T1	FALSE	S165	S001	FALSE	Post-travel	Pre-travel	FALSE	Southern Asia	Southeastern Asia	FALSE
S021_T0	S001_T0	0.811339	S001_T0__S021_T0	FALSE	S021	S001	FALSE	Pre-travel	Pre-travel	TRUE	Northern Africa	Southeastern Asia	FALSE
S169_T0	S001_T0	0.859645	S001_T0__S169_T0	FALSE	S169	S001	FALSE	Pre-travel	Pre-travel	TRUE	Southern Asia	Southeastern Asia	FALSE
S155_T1	S001_T0	0.885827	S001_T0__S155_T1	FALSE	S155	S001	FALSE	Post-travel	Pre-travel	FALSE	Southern Asia	Southeastern Asia	FALSE
S173_T0	S001_T0	0.820549	S001_T0__S173_T0	FALSE	S173	S001	FALSE	Pre-travel	Pre-travel	TRUE	Southeastern Asia	Southeastern Asia	TRUE
S187_T1	S001_T0	0.844105	S001_T0__S187_T1	FALSE	S187	S001	FALSE	Post-travel	Pre-travel	FALSE	Eastern Africa	Southeastern Asia	FALSE
S140_T1	S001_T0	0.902127	S001_T0__S140_T1	FALSE	S140	S001	FALSE	Post-travel	Pre-travel	FALSE	Southeastern Asia	Southeastern Asia	TRUE
S102_T1	S001_T0	0.694622	S001_T0__S102_T1	FALSE	S102	S001	FALSE	Post-travel	Pre-travel	FALSE	Southeastern Asia	Southeastern Asia	TRUE
S091_T0	S001_T0	0.750988	S001_T0__S091_T0	FALSE	S091	S001	FALSE	Pre-travel	Pre-travel	TRUE	Eastern Africa	Southeastern Asia	FALSE
S023_T1	S001_T0	0.914231	S001_T0__S023_T1	FALSE	S023	S001	FALSE	Post-travel	Pre-travel	FALSE	Southern Asia	Southeastern Asia	FALSE
S098_T1	S001_T0	0.931037	S001_T0__S098_T1	FALSE	S098	S001	FALSE	Post-travel	Pre-travel	FALSE	Eastern Africa	Southeastern Asia	FALSE
S074_T1	S001_T0	0.641259	S001_T0__S074_T1	FALSE	S074	S001	FALSE	Post-travel	Pre-travel	FALSE	Northern Africa	Southeastern Asia	FALSE
S038_T1	S001_T0	0.872231	S001_T0__S038_T1	FALSE	S038	S001	FALSE	Post-travel	Pre-travel	FALSE	Southeastern Asia	Southeastern Asia	TRUE
S078_T0	S001_T0	0.773703	S001_T0__S078_T0	FALSE	S078	S001	FALSE	Pre-travel	Pre-travel	TRUE	Eastern Africa	Southeastern Asia	FALSE
S076_T1	S001_T0	0.688243	S001_T0__S076_T1	FALSE	S076	S001	FALSE	Post-travel	Pre-travel	FALSE	Southeastern Asia	Southeastern Asia	TRUE
S154_T1	S001_T0	0.687414	S001_T0__S154_T1	FALSE	S154	S001	FALSE	Post-travel	Pre-travel	FALSE	Southern Asia	Southeastern Asia	FALSE
S069_T0	S001_T0	0.789143	S001_T0__S069_T0	FALSE	S069	S001	FALSE	Pre-travel	Pre-travel	TRUE	Southern Asia	Southeastern Asia	FALSE
S125_T0	S001_T0	0.818795	S001_T0__S125_T0	FALSE	S125	S001	FALSE	Pre-travel	Pre-travel	TRUE	Southern Asia	Southeastern Asia	FALSE
S130_T1	S001_T0	0.820375	S001_T0__S130_T1	FALSE	S130	S001	FALSE	Post-travel	Pre-travel	FALSE	Southeastern Asia	Southeastern Asia	TRUE
S084_T0	S001_T0	0.745112	S001_T0__S084_T0	FALSE	S084	S001	FALSE	Pre-travel	Pre-travel	TRUE	Southeastern Asia	Southeastern Asia	TRUE
S128_T1	S001_T0	0.832103	S001_T0__S128_T1	FALSE	S128	S001	FALSE	Post-travel	Pre-travel	FALSE	Northern Africa	Southeastern Asia	FALSE
S030_T0	S001_T0	0.900506	S001_T0__S030_T0	FALSE	S030	S001	FALSE	Pre-travel	Pre-travel	TRUE	Southeastern Asia	Southeastern Asia	TRUE
S104_T1	S001_T0	0.810243	S001_T0__S104_T1	FALSE	S104	S001	FALSE	Post-travel	Pre-travel	FALSE	Northern Africa	Southeastern Asia	FALSE
S133_T1	S001_T0	0.782521	S001_T0__S133_T1	FALSE	S133	S001	FALSE	Post-travel	Pre-travel	FALSE	Southeastern Asia	Southeastern Asia	TRUE
S035_T1	S001_T0	0.487217	S001_T0__S035_T1	FALSE	S035	S001	FALSE	Post-travel	Pre-travel	FALSE	Eastern Africa	Southeastern Asia	FALSE
S117_T0	S001_T0	0.908125	S001_T0__S117_T0	FALSE	S117	S001	FALSE	Pre-travel	Pre-travel	TRUE	Southeastern Asia	Southeastern Asia	TRUE
S139_T0	S001_T0	0.726519	S001_T0__S139_T0	FALSE	S139	S001	FALSE	Pre-travel	Pre-travel	TRUE	Southeastern Asia	Southeastern Asia	TRUE
S154_T0	S001_T0	0.647856	S001_T0__S154_T0	FALSE	S154	S001	FALSE	Pre-travel	Pre-travel	TRUE	Southern Asia	Southeastern Asia	FALSE
S123_T1	S001_T0	0.481081	S001_T0__S123_T1	FALSE	S123	S001	FALSE	Post-travel	Pre-travel	FALSE	Eastern Africa	Southeastern Asia	FALSE
S114_T1	S001_T0	0.899169	S001_T0__S114_T1	FALSE	S114	S001	FALSE	Post-travel	Pre-travel	FALSE	Eastern Africa	Southeastern Asia	FALSE
S013_T1	S001_T0	0.695843	S001_T0__S013_T1	FALSE	S013	S001	FALSE	Post-travel	Pre-travel	FALSE	Eastern Africa	Southeastern Asia	FALSE
S126_T0	S001_T0	0.620196	S001_T0__S126_T0	FALSE	S126	S001	FALSE	Pre-travel	Pre-travel	TRUE	Southeastern Asia	Southeastern Asia	TRUE
S122_T0	S001_T0	0.844838	S001_T0__S122_T0	FALSE	S122	S001	FALSE	Pre-travel	Pre-travel	TRUE	Southeastern Asia	Southeastern Asia	TRUE
S171_T1	S001_T0	0.84842	S001_T0__S171_T1	FALSE	S171	S001	FALSE	Post-travel	Pre-travel	FALSE	Southeastern Asia	Southeastern Asia	TRUE
S065_T1	S001_T0	0.900714	S001_T0__S065_T1	FALSE	S065	S001	FALSE	Post-travel	Pre-travel	FALSE	Eastern Africa	Southeastern Asia	FALSE
S182_T1	S001_T0	0.863159	S001_T0__S182_T1	FALSE	S182	S001	FALSE	Post-travel	Pre-travel	FALSE	Northern Africa	Southeastern Asia	FALSE
S089_T1	S001_T0	0.811177	S001_T0__S089_T1	FALSE	S089	S001	FALSE	Post-travel	Pre-travel	FALSE	Eastern Africa	Southeastern Asia	FALSE
S090_T0	S001_T0	0.870993	S001_T0__S090_T0	FALSE	S090	S001	FALSE	Pre-travel	Pre-travel	TRUE	Eastern Africa	Southeastern Asia	FALSE
S104_T0	S001_T0	0.562658	S001_T0__S104_T0	FALSE	S104	S001	FALSE	Pre-travel	Pre-travel	TRUE	Northern Africa	Southeastern Asia	FALSE
S050_T0	S001_T0	0.667955	S001_T0__S050_T0	FALSE	S050	S001	FALSE	Pre-travel	Pre-travel	TRUE	Southern Asia	Southeastern Asia	FALSE
S024_T0	S001_T0	0.744061	S001_T0__S024_T0	FALSE	S024	S001	FALSE	Pre-travel	Pre-travel	TRUE	Southern Asia	Southeastern Asia	FALSE
S077_T1	S001_T0	0.712815	S001_T0__S077_T1	FALSE	S077	S001	FALSE	Post-travel	Pre-travel	FALSE	Eastern Africa	Southeastern Asia	FALSE
S119_T0	S001_T0	0.645904	S001_T0__S119_T0	FALSE	S119	S001	FALSE	Pre-travel	Pre-travel	TRUE	Southeastern Asia	Southeastern Asia	TRUE
S177_T0	S001_T0	0.890072	S001_T0__S177_T0	FALSE	S177	S001	FALSE	Pre-travel	Pre-travel	TRUE	Southeastern Asia	Southeastern Asia	TRUE
S148_T1	S001_T0	0.874811	S001_T0__S148_T1	FALSE	S148	S001	FALSE	Post-travel	Pre-travel	FALSE	Northern Africa	Southeastern Asia	FALSE
S152_T0	S001_T0	0.661343	S001_T0__S152_T0	FALSE	S152	S001	FALSE	Pre-travel	Pre-travel	TRUE	Eastern Africa	Southeastern Asia	FALSE
S144_T1	S001_T0	0.810165	S001_T0__S144_T1	FALSE	S144	S001	FALSE	Post-travel	Pre-travel	FALSE	Eastern Africa	Southeastern Asia	FALSE
S131_T1	S001_T0	0.871665	S001_T0__S131_T1	FALSE	S131	S001	FALSE	Post-travel	Pre-travel	FALSE	Northern Africa	Southeastern Asia	FALSE
S176_T1	S001_T0	0.856831	S001_T0__S176_T1	FALSE	S176	S001	FALSE	Post-travel	Pre-travel	FALSE	Northern Africa	Southeastern Asia	FALSE
S156_T0	S001_T0	0.896471	S001_T0__S156_T0	FALSE	S156	S001	FALSE	Pre-travel	Pre-travel	TRUE	Southeastern Asia	Southeastern Asia	TRUE
S105_T0	S001_T0	0.751927	S001_T0__S105_T0	FALSE	S105	S001	FALSE	Pre-travel	Pre-travel	TRUE	Eastern Africa	Southeastern Asia	FALSE
S050_T1	S001_T0	0.756347	S001_T0__S050_T1	FALSE	S050	S001	FALSE	Post-travel	Pre-travel	FALSE	Southern Asia	Southeastern Asia	FALSE
S055_T0	S001_T0	0.71365	S001_T0__S055_T0	FALSE	S055	S001	FALSE	Pre-travel	Pre-travel	TRUE	Eastern Africa	Southeastern Asia	FALSE
S143_T1	S001_T0	0.888678	S001_T0__S143_T1	FALSE	S143	S001	FALSE	Post-travel	Pre-travel	FALSE	Eastern Africa	Southeastern Asia	FALSE
S178_T0	S001_T0	0.808993	S001_T0__S178_T0	FALSE	S178	S001	FALSE	Pre-travel	Pre-travel	TRUE	Eastern Africa	Southeastern Asia	FALSE
S062_T0	S001_T0	0.566832	S001_T0__S062_T0	FALSE	S062	S001	FALSE	Pre-travel	Pre-travel	TRUE	Eastern Africa	Southeastern Asia	FALSE
S164_T0	S001_T0	0.733954	S001_T0__S164_T0	FALSE	S164	S001	FALSE	Pre-travel	Pre-travel	TRUE	Southeastern Asia	Southeastern Asia	TRUE
S083_T0	S001_T0	0.770231	S001_T0__S083_T0	FALSE	S083	S001	FALSE	Pre-travel	Pre-travel	TRUE	Northern Africa	Southeastern Asia	FALSE
S039_T0	S001_T0	0.731868	S001_T0__S039_T0	FALSE	S039	S001	FALSE	Pre-travel	Pre-travel	TRUE	Northern Africa	Southeastern Asia	FALSE
S136_T1	S001_T0	0.695002	S001_T0__S136_T1	FALSE	S136	S001	FALSE	Post-travel	Pre-travel	FALSE	Southern Asia	Southeastern Asia	FALSE
S075_T0	S001_T0	0.872201	S001_T0__S075_T0	FALSE	S075	S001	FALSE	Pre-travel	Pre-travel	TRUE	Northern Africa	Southeastern Asia	FALSE
S155_T0	S001_T0	0.612238	S001_T0__S155_T0	FALSE	S155	S001	FALSE	Pre-travel	Pre-travel	TRUE	Southern Asia	Southeastern Asia	FALSE
S087_T1	S001_T0	0.701468	S001_T0__S087_T1	FALSE	S087	S001	FALSE	Post-travel	Pre-travel	FALSE	Eastern Africa	Southeastern Asia	FALSE
S018_T0	S001_T0	0.476837	S001_T0__S018_T0	FALSE	S018	S001	FALSE	Pre-travel	Pre-travel	TRUE	Eastern Africa	Southeastern Asia	FALSE
S046_T1	S001_T0	0.647684	S001_T0__S046_T1	FALSE	S046	S001	FALSE	Post-travel	Pre-travel	FALSE	Southern Asia	Southeastern Asia	FALSE
S183_T1	S001_T1	0.299486	S001_T1__S183_T1	FALSE	S183	S001	FALSE	Post-travel	Post-travel	TRUE	Southern Asia	Southeastern Asia	FALSE
S022_T1	S001_T1	0.482519	S001_T1__S022_T1	FALSE	S022	S001	FALSE	Post-travel	Post-travel	TRUE	Northern Africa	Southeastern Asia	FALSE
S047_T1	S001_T1	0.41871	S001_T1__S047_T1	FALSE	S047	S001	FALSE	Post-travel	Post-travel	TRUE	Southern Asia	Southeastern Asia	FALSE
S167_T1	S001_T1	0.922172	S001_T1__S167_T1	FALSE	S167	S001	FALSE	Post-travel	Post-travel	TRUE	Eastern Africa	Southeastern Asia	FALSE
S104_T1	S001_T1	0.433454	S001_T1__S104_T1	FALSE	S104	S001	FALSE	Post-travel	Post-travel	TRUE	Northern Africa	Southeastern Asia	FALSE
S011_T1	S001_T1	0.695547	S001_T1__S011_T1	FALSE	S011	S001	FALSE	Post-travel	Post-travel	TRUE	Southeastern Asia	Southeastern Asia	TRUE
S181_T1	S001_T1	0.897828	S001_T1__S181_T1	FALSE	S181	S001	FALSE	Post-travel	Post-travel	TRUE	Southern Asia	Southeastern Asia	FALSE
S014_T1	S001_T1	0.46944	S001_T1__S014_T1	FALSE	S014	S001	FALSE	Post-travel	Post-travel	TRUE	Northern Africa	Southeastern Asia	FALSE
S062_T1	S001_T1	0.399821	S001_T1__S062_T1	FALSE	S062	S001	FALSE	Post-travel	Post-travel	TRUE	Eastern Africa	Southeastern Asia	FALSE
S162_T1	S001_T1	0.881805	S001_T1__S162_T1	FALSE	S162	S001	FALSE	Post-travel	Post-travel	TRUE	Northern Africa	Southeastern Asia	FALSE
S056_T1	S001_T1	0.609531	S001_T1__S056_T1	FALSE	S056	S001	FALSE	Post-travel	Post-travel	TRUE	Southern Asia	Southeastern Asia	FALSE
S146_T0	S001_T1	0.640199	S001_T1__S146_T0	FALSE	S146	S001	FALSE	Pre-travel	Post-travel	FALSE	Northern Africa	Southeastern Asia	FALSE
S087_T1	S001_T1	0.633893	S001_T1__S087_T1	FALSE	S087	S001	FALSE	Post-travel	Post-travel	TRUE	Eastern Africa	Southeastern Asia	FALSE
S119_T0	S001_T1	0.809196	S001_T1__S119_T0	FALSE	S119	S001	FALSE	Pre-travel	Post-travel	FALSE	Southeastern Asia	Southeastern Asia	TRUE
S050_T1	S001_T1	0.678038	S001_T1__S050_T1	FALSE	S050	S001	FALSE	Post-travel	Post-travel	TRUE	Southern Asia	Southeastern Asia	FALSE
S148_T1	S001_T1	0.417628	S001_T1__S148_T1	FALSE	S148	S001	FALSE	Post-travel	Post-travel	TRUE	Northern Africa	Southeastern Asia	FALSE
S057_T0	S001_T1	0.957037	S001_T1__S057_T0	FALSE	S057	S001	FALSE	Pre-travel	Post-travel	FALSE	Southern Asia	Southeastern Asia	FALSE
S113_T1	S001_T1	0.891058	S001_T1__S113_T1	FALSE	S113	S001	FALSE	Post-travel	Post-travel	TRUE	Eastern Africa	Southeastern Asia	FALSE
S003_T1	S001_T1	0.761266	S001_T1__S003_T1	FALSE	S003	S001	FALSE	Post-travel	Post-travel	TRUE	Southeastern Asia	Southeastern Asia	TRUE
S135_T1	S001_T1	0.780016	S001_T1__S135_T1	FALSE	S135	S001	FALSE	Post-travel	Post-travel	TRUE	Southern Asia	Southeastern Asia	FALSE
S053_T1	S001_T1	0.611167	S001_T1__S053_T1	FALSE	S053	S001	FALSE	Post-travel	Post-travel	TRUE	Northern Africa	Southeastern Asia	FALSE
S003_T0	S001_T1	0.91097	S001_T1__S003_T0	FALSE	S003	S001	FALSE	Pre-travel	Post-travel	FALSE	Southeastern Asia	Southeastern Asia	TRUE
S141_T0	S001_T1	0.953016	S001_T1__S141_T0	FALSE	S141	S001	FALSE	Pre-travel	Post-travel	FALSE	Eastern Africa	Southeastern Asia	FALSE
S026_T1	S001_T1	0.338839	S001_T1__S026_T1	FALSE	S026	S001	FALSE	Post-travel	Post-travel	TRUE	Southeastern Asia	Southeastern Asia	TRUE
S013_T1	S001_T1	0.886114	S001_T1__S013_T1	FALSE	S013	S001	FALSE	Post-travel	Post-travel	TRUE	Eastern Africa	Southeastern Asia	FALSE
S067_T1	S001_T1	0.715886	S001_T1__S067_T1	FALSE	S067	S001	FALSE	Post-travel	Post-travel	TRUE	Eastern Africa	Southeastern Asia	FALSE
S184_T0	S001_T1	0.945074	S001_T1__S184_T0	FALSE	S184	S001	FALSE	Pre-travel	Post-travel	FALSE	Northern Africa	Southeastern Asia	FALSE
S026_T0	S001_T1	0.758091	S001_T1__S026_T0	FALSE	S026	S001	FALSE	Pre-travel	Post-travel	FALSE	Southeastern Asia	Southeastern Asia	TRUE
S029_T1	S001_T1	0.647433	S001_T1__S029_T1	FALSE	S029	S001	FALSE	Post-travel	Post-travel	TRUE	Eastern Africa	Southeastern Asia	FALSE
S006_T0	S001_T1	0.938234	S001_T1__S006_T0	FALSE	S006	S001	FALSE	Pre-travel	Post-travel	FALSE	Southern Asia	Southeastern Asia	FALSE
S017_T0	S001_T1	0.516463	S001_T1__S017_T0	FALSE	S017	S001	FALSE	Pre-travel	Post-travel	FALSE	Southern Asia	Southeastern Asia	FALSE
S100_T1	S001_T1	0.24392	S001_T1__S100_T1	FALSE	S100	S001	FALSE	Post-travel	Post-travel	TRUE	Southern Asia	Southeastern Asia	FALSE
S160_T1	S001_T1	0.401766	S001_T1__S160_T1	FALSE	S160	S001	FALSE	Post-travel	Post-travel	TRUE	Southeastern Asia	Southeastern Asia	TRUE
S075_T1	S001_T1	0.791136	S001_T1__S075_T1	FALSE	S075	S001	FALSE	Post-travel	Post-travel	TRUE	Northern Africa	Southeastern Asia	FALSE
S147_T0	S001_T1	0.815727	S001_T1__S147_T0	FALSE	S147	S001	FALSE	Pre-travel	Post-travel	FALSE	Southern Asia	Southeastern Asia	FALSE
S111_T1	S001_T1	0.812309	S001_T1__S111_T1	FALSE	S111	S001	FALSE	Post-travel	Post-travel	TRUE	Northern Africa	Southeastern Asia	FALSE
S072_T1	S001_T1	0.549473	S001_T1__S072_T1	FALSE	S072	S001	FALSE	Post-travel	Post-travel	TRUE	Eastern Africa	Southeastern Asia	FALSE
S177_T0	S001_T1	0.384194	S001_T1__S177_T0	FALSE	S177	S001	FALSE	Pre-travel	Post-travel	FALSE	Southeastern Asia	Southeastern Asia	TRUE
S130_T1	S001_T1	0.534701	S001_T1__S130_T1	FALSE	S130	S001	FALSE	Post-travel	Post-travel	TRUE	Southeastern Asia	Southeastern Asia	TRUE
S101_T1	S001_T1	0.398931	S001_T1__S101_T1	FALSE	S101	S001	FALSE	Post-travel	Post-travel	TRUE	Southeastern Asia	Southeastern Asia	TRUE
S105_T1	S001_T1	0.614358	S001_T1__S105_T1	FALSE	S105	S001	FALSE	Post-travel	Post-travel	TRUE	Eastern Africa	Southeastern Asia	FALSE
S067_T0	S001_T1	0.937496	S001_T1__S067_T0	FALSE	S067	S001	FALSE	Pre-travel	Post-travel	FALSE	Eastern Africa	Southeastern Asia	FALSE
S135_T0	S001_T1	0.863697	S001_T1__S135_T0	FALSE	S135	S001	FALSE	Pre-travel	Post-travel	FALSE	Southern Asia	Southeastern Asia	FALSE
S113_T0	S001_T1	0.95144	S001_T1__S113_T0	FALSE	S113	S001	FALSE	Pre-travel	Post-travel	FALSE	Eastern Africa	Southeastern Asia	FALSE
S037_T1	S001_T1	0.855837	S001_T1__S037_T1	FALSE	S037	S001	FALSE	Post-travel	Post-travel	TRUE	Southeastern Asia	Southeastern Asia	TRUE
S021_T1	S001_T1	0.546422	S001_T1__S021_T1	FALSE	S021	S001	FALSE	Post-travel	Post-travel	TRUE	Northern Africa	Southeastern Asia	FALSE
S164_T1	S001_T1	0.888006	S001_T1__S164_T1	FALSE	S164	S001	FALSE	Post-travel	Post-travel	TRUE	Southeastern Asia	Southeastern Asia	TRUE
S180_T1	S001_T1	0.923531	S001_T1__S180_T1	FALSE	S180	S001	FALSE	Post-travel	Post-travel	TRUE	Southern Asia	Southeastern Asia	FALSE
S120_T1	S001_T1	0.539007	S001_T1__S120_T1	FALSE	S120	S001	FALSE	Post-travel	Post-travel	TRUE	Southern Asia	Southeastern Asia	FALSE
S172_T1	S001_T1	0.493213	S001_T1__S172_T1	FALSE	S172	S001	FALSE	Post-travel	Post-travel	TRUE	Northern Africa	Southeastern Asia	FALSE
S172_T0	S001_T1	0.775978	S001_T1__S172_T0	FALSE	S172	S001	FALSE	Pre-travel	Post-travel	FALSE	Northern Africa	Southeastern Asia	FALSE
S039_T1	S001_T1	0.395448	S001_T1__S039_T1	FALSE	S039	S001	FALSE	Post-travel	Post-travel	TRUE	Northern Africa	Southeastern Asia	FALSE
S149_T1	S001_T1	0.431356	S001_T1__S149_T1	FALSE	S149	S001	FALSE	Post-travel	Post-travel	TRUE	Eastern Africa	Southeastern Asia	FALSE
S051_T0	S001_T1	0.942634	S001_T1__S051_T0	FALSE	S051	S001	FALSE	Pre-travel	Post-travel	FALSE	Southern Asia	Southeastern Asia	FALSE
S161_T0	S001_T1	0.671538	S001_T1__S161_T0	FALSE	S161	S001	FALSE	Pre-travel	Post-travel	FALSE	Northern Africa	Southeastern Asia	FALSE
S029_T0	S001_T1	0.352298	S001_T1__S029_T0	FALSE	S029	S001	FALSE	Pre-travel	Post-travel	FALSE	Eastern Africa	Southeastern Asia	FALSE
S104_T0	S001_T1	0.844346	S001_T1__S104_T0	FALSE	S104	S001	FALSE	Pre-travel	Post-travel	FALSE	Northern Africa	Southeastern Asia	FALSE
S097_T1	S001_T1	0.511322	S001_T1__S097_T1	FALSE	S097	S001	FALSE	Post-travel	Post-travel	TRUE	Eastern Africa	Southeastern Asia	FALSE
S124_T0	S001_T1	0.514821	S001_T1__S124_T0	FALSE	S124	S001	FALSE	Pre-travel	Post-travel	FALSE	Southeastern Asia	Southeastern Asia	TRUE
S178_T1	S001_T1	0.814838	S001_T1__S178_T1	FALSE	S178	S001	FALSE	Post-travel	Post-travel	TRUE	Eastern Africa	Southeastern Asia	FALSE
S107_T0	S001_T1	0.869117	S001_T1__S107_T0	FALSE	S107	S001	FALSE	Pre-travel	Post-travel	FALSE	Southern Asia	Southeastern Asia	FALSE
S015_T1	S001_T1	0.374391	S001_T1__S015_T1	FALSE	S015	S001	FALSE	Post-travel	Post-travel	TRUE	Southern Asia	Southeastern Asia	FALSE
S077_T1	S001_T1	0.692079	S001_T1__S077_T1	FALSE	S077	S001	FALSE	Post-travel	Post-travel	TRUE	Eastern Africa	Southeastern Asia	FALSE
S173_T1	S001_T1	0.353574	S001_T1__S173_T1	FALSE	S173	S001	FALSE	Post-travel	Post-travel	TRUE	Southeastern Asia	Southeastern Asia	TRUE
S065_T0	S001_T1	0.674412	S001_T1__S065_T0	FALSE	S065	S001	FALSE	Pre-travel	Post-travel	FALSE	Eastern Africa	Southeastern Asia	FALSE
S171_T0	S001_T1	0.495414	S001_T1__S171_T0	FALSE	S171	S001	FALSE	Pre-travel	Post-travel	FALSE	Southeastern Asia	Southeastern Asia	TRUE
S007_T0	S001_T1	0.886283	S001_T1__S007_T0	FALSE	S007	S001	FALSE	Pre-travel	Post-travel	FALSE	Southern Asia	Southeastern Asia	FALSE
S028_T1	S001_T1	0.41288	S001_T1__S028_T1	FALSE	S028	S001	FALSE	Post-travel	Post-travel	TRUE	Southeastern Asia	Southeastern Asia	TRUE
S131_T1	S001_T1	0.693093	S001_T1__S131_T1	FALSE	S131	S001	FALSE	Post-travel	Post-travel	TRUE	Northern Africa	Southeastern Asia	FALSE
S009_T1	S001_T1	0.878702	S001_T1__S009_T1	FALSE	S009	S001	FALSE	Post-travel	Post-travel	TRUE	Northern Africa	Southeastern Asia	FALSE
S137_T1	S001_T1	0.358265	S001_T1__S137_T1	FALSE	S137	S001	FALSE	Post-travel	Post-travel	TRUE	Southern Asia	Southeastern Asia	FALSE
S028_T0	S001_T1	0.651942	S001_T1__S028_T0	FALSE	S028	S001	FALSE	Pre-travel	Post-travel	FALSE	Southeastern Asia	Southeastern Asia	TRUE
S012_T1	S001_T1	0.250121	S001_T1__S012_T1	FALSE	S012	S001	FALSE	Post-travel	Post-travel	TRUE	Eastern Africa	Southeastern Asia	FALSE
S079_T1	S001_T1	0.872772	S001_T1__S079_T1	FALSE	S079	S001	FALSE	Post-travel	Post-travel	TRUE	Southern Asia	Southeastern Asia	FALSE
S083_T1	S001_T1	0.938184	S001_T1__S083_T1	FALSE	S083	S001	FALSE	Post-travel	Post-travel	TRUE	Northern Africa	Southeastern Asia	FALSE
S099_T0	S001_T1	0.479424	S001_T1__S099_T0	FALSE	S099	S001	FALSE	Pre-travel	Post-travel	FALSE	Southern Asia	Southeastern Asia	FALSE
S165_T1	S001_T1	0.672779	S001_T1__S165_T1	FALSE	S165	S001	FALSE	Post-travel	Post-travel	TRUE	Southern Asia	Southeastern Asia	FALSE
S182_T1	S001_T1	0.385481	S001_T1__S182_T1	FALSE	S182	S001	FALSE	Post-travel	Post-travel	TRUE	Northern Africa	Southeastern Asia	FALSE
S015_T0	S001_T1	0.937564	S001_T1__S015_T0	FALSE	S015	S001	FALSE	Pre-travel	Post-travel	FALSE	Southern Asia	Southeastern Asia	FALSE
S085_T1	S001_T1	0.566824	S001_T1__S085_T1	FALSE	S085	S001	FALSE	Post-travel	Post-travel	TRUE	Southern Asia	Southeastern Asia	FALSE
S138_T1	S001_T1	0.317138	S001_T1__S138_T1	FALSE	S138	S001	FALSE	Post-travel	Post-travel	TRUE	Southern Asia	Southeastern Asia	FALSE
S158_T1	S001_T1	0.551792	S001_T1__S158_T1	FALSE	S158	S001	FALSE	Post-travel	Post-travel	TRUE	Southern Asia	Southeastern Asia	FALSE
S065_T1	S001_T1	0.370993	S001_T1__S065_T1	FALSE	S065	S001	FALSE	Post-travel	Post-travel	TRUE	Eastern Africa	Southeastern Asia	FALSE
S063_T1	S001_T1	0.656159	S001_T1__S063_T1	FALSE	S063	S001	FALSE	Post-travel	Post-travel	TRUE	Southeastern Asia	Southeastern Asia	TRUE
S107_T1	S001_T1	0.853049	S001_T1__S107_T1	FALSE	S107	S001	FALSE	Post-travel	Post-travel	TRUE	Southern Asia	Southeastern Asia	FALSE
S075_T0	S001_T1	0.288688	S001_T1__S075_T0	FALSE	S075	S001	FALSE	Pre-travel	Post-travel	FALSE	Northern Africa	Southeastern Asia	FALSE
S106_T0	S001_T1	0.60909	S001_T1__S106_T0	FALSE	S106	S001	FALSE	Pre-travel	Post-travel	FALSE	Southeastern Asia	Southeastern Asia	TRUE
S169_T1	S001_T1	0.624284	S001_T1__S169_T1	FALSE	S169	S001	FALSE	Post-travel	Post-travel	TRUE	Southern Asia	Southeastern Asia	FALSE
S145_T0	S001_T1	0.772863	S001_T1__S145_T0	FALSE	S145	S001	FALSE	Pre-travel	Post-travel	FALSE	Northern Africa	Southeastern Asia	FALSE
S116_T0	S001_T1	0.885208	S001_T1__S116_T0	FALSE	S116	S001	FALSE	Pre-travel	Post-travel	FALSE	Southeastern Asia	Southeastern Asia	TRUE
S043_T1	S001_T1	0.602995	S001_T1__S043_T1	FALSE	S043	S001	FALSE	Post-travel	Post-travel	TRUE	Southeastern Asia	Southeastern Asia	TRUE
S044_T0	S001_T1	0.448661	S001_T1__S044_T0	FALSE	S044	S001	FALSE	Pre-travel	Post-travel	FALSE	Southeastern Asia	Southeastern Asia	TRUE
S059_T1	S001_T1	0.44913	S001_T1__S059_T1	FALSE	S059	S001	FALSE	Post-travel	Post-travel	TRUE	Southeastern Asia	Southeastern Asia	TRUE
S025_T1	S001_T1	0.431889	S001_T1__S025_T1	FALSE	S025	S001	FALSE	Post-travel	Post-travel	TRUE	Southern Asia	Southeastern Asia	FALSE
S009_T0	S001_T1	0.958721	S001_T1__S009_T0	FALSE	S009	S001	FALSE	Pre-travel	Post-travel	FALSE	Northern Africa	Southeastern Asia	FALSE
S008_T0	S001_T1	0.889565	S001_T1__S008_T0	FALSE	S008	S001	FALSE	Pre-travel	Post-travel	FALSE	Northern Africa	Southeastern Asia	FALSE
S136_T1	S001_T1	0.898962	S001_T1__S136_T1	FALSE	S136	S001	FALSE	Post-travel	Post-travel	TRUE	Southern Asia	Southeastern Asia	FALSE
S155_T0	S001_T1	0.7194	S001_T1__S155_T0	FALSE	S155	S001	FALSE	Pre-travel	Post-travel	FALSE	Southern Asia	Southeastern Asia	FALSE
S161_T1	S001_T1	0.57692	S001_T1__S161_T1	FALSE	S161	S001	FALSE	Post-travel	Post-travel	TRUE	Northern Africa	Southeastern Asia	FALSE
S118_T1	S001_T1	0.643989	S001_T1__S118_T1	FALSE	S118	S001	FALSE	Post-travel	Post-travel	TRUE	Southern Asia	Southeastern Asia	FALSE
S187_T1	S001_T1	0.472338	S001_T1__S187_T1	FALSE	S187	S001	FALSE	Post-travel	Post-travel	TRUE	Eastern Africa	Southeastern Asia	FALSE
S168_T0	S001_T1	0.44801	S001_T1__S168_T0	FALSE	S168	S001	FALSE	Pre-travel	Post-travel	FALSE	Southern Asia	Southeastern Asia	FALSE
S159_T1	S001_T1	0.364267	S001_T1__S159_T1	FALSE	S159	S001	FALSE	Post-travel	Post-travel	TRUE	Southern Asia	Southeastern Asia	FALSE
S117_T0	S001_T1	0.300397	S001_T1__S117_T0	FALSE	S117	S001	FALSE	Pre-travel	Post-travel	FALSE	Southeastern Asia	Southeastern Asia	TRUE
S187_T0	S001_T1	0.361071	S001_T1__S187_T0	FALSE	S187	S001	FALSE	Pre-travel	Post-travel	FALSE	Eastern Africa	Southeastern Asia	FALSE
S134_T0	S001_T1	0.824343	S001_T1__S134_T0	FALSE	S134	S001	FALSE	Pre-travel	Post-travel	FALSE	Southeastern Asia	Southeastern Asia	TRUE
S173_T0	S001_T1	0.408156	S001_T1__S173_T0	FALSE	S173	S001	FALSE	Pre-travel	Post-travel	FALSE	Southeastern Asia	Southeastern Asia	TRUE
S038_T1	S001_T1	0.342307	S001_T1__S038_T1	FALSE	S038	S001	FALSE	Post-travel	Post-travel	TRUE	Southeastern Asia	Southeastern Asia	TRUE
S105_T0	S001_T1	0.554389	S001_T1__S105_T0	FALSE	S105	S001	FALSE	Pre-travel	Post-travel	FALSE	Eastern Africa	Southeastern Asia	FALSE
S002_T0	S001_T1	0.915157	S001_T1__S002_T0	FALSE	S002	S001	FALSE	Pre-travel	Post-travel	FALSE	Southern Asia	Southeastern Asia	FALSE
S185_T1	S001_T1	0.566422	S001_T1__S185_T1	FALSE	S185	S001	FALSE	Post-travel	Post-travel	TRUE	Southeastern Asia	Southeastern Asia	TRUE
S136_T0	S001_T1	0.576081	S001_T1__S136_T0	FALSE	S136	S001	FALSE	Pre-travel	Post-travel	FALSE	Southern Asia	Southeastern Asia	FALSE
S100_T0	S001_T1	0.507407	S001_T1__S100_T0	FALSE	S100	S001	FALSE	Pre-travel	Post-travel	FALSE	Southern Asia	Southeastern Asia	FALSE
S002_T1	S001_T1	0.926854	S001_T1__S002_T1	FALSE	S002	S001	FALSE	Post-travel	Post-travel	TRUE	Southern Asia	Southeastern Asia	FALSE
S086_T1	S001_T1	0.943757	S001_T1__S086_T1	FALSE	S086	S001	FALSE	Post-travel	Post-travel	TRUE	Northern Africa	Southeastern Asia	FALSE
S156_T1	S001_T1	0.44373	S001_T1__S156_T1	FALSE	S156	S001	FALSE	Post-travel	Post-travel	TRUE	Southeastern Asia	Southeastern Asia	TRUE
S068_T1	S001_T1	0.455849	S001_T1__S068_T1	FALSE	S068	S001	FALSE	Post-travel	Post-travel	TRUE	Eastern Africa	Southeastern Asia	FALSE
S174_T0	S001_T1	0.663091	S001_T1__S174_T0	FALSE	S174	S001	FALSE	Pre-travel	Post-travel	FALSE	Southeastern Asia	Southeastern Asia	TRUE
S071_T0	S001_T1	0.911778	S001_T1__S071_T0	FALSE	S071	S001	FALSE	Pre-travel	Post-travel	FALSE	Southeastern Asia	Southeastern Asia	TRUE
S176_T0	S001_T1	0.53335	S001_T1__S176_T0	FALSE	S176	S001	FALSE	Pre-travel	Post-travel	FALSE	Northern Africa	Southeastern Asia	FALSE
S188_T1	S001_T1	0.707713	S001_T1__S188_T1	FALSE	S188	S001	FALSE	Post-travel	Post-travel	TRUE	Northern Africa	Southeastern Asia	FALSE
S048_T0	S001_T1	0.957431	S001_T1__S048_T0	FALSE	S048	S001	FALSE	Pre-travel	Post-travel	FALSE	Northern Africa	Southeastern Asia	FALSE
S151_T1	S001_T1	0.547852	S001_T1__S151_T1	FALSE	S151	S001	FALSE	Post-travel	Post-travel	TRUE	Southern Asia	Southeastern Asia	FALSE
S056_T0	S001_T1	0.680785	S001_T1__S056_T0	FALSE	S056	S001	FALSE	Pre-travel	Post-travel	FALSE	Southern Asia	Southeastern Asia	FALSE
S150_T0	S001_T1	0.466268	S001_T1__S150_T0	FALSE	S150	S001	FALSE	Pre-travel	Post-travel	FALSE	Northern Africa	Southeastern Asia	FALSE
S090_T0	S001_T1	0.457799	S001_T1__S090_T0	FALSE	S090	S001	FALSE	Pre-travel	Post-travel	FALSE	Eastern Africa	Southeastern Asia	FALSE
S134_T1	S001_T1	0.82008	S001_T1__S134_T1	FALSE	S134	S001	FALSE	Post-travel	Post-travel	TRUE	Southeastern Asia	Southeastern Asia	TRUE
S052_T1	S001_T1	0.593496	S001_T1__S052_T1	FALSE	S052	S001	FALSE	Post-travel	Post-travel	TRUE	Southeastern Asia	Southeastern Asia	TRUE
S145_T1	S001_T1	0.473069	S001_T1__S145_T1	FALSE	S145	S001	FALSE	Post-travel	Post-travel	TRUE	Northern Africa	Southeastern Asia	FALSE
S072_T0	S001_T1	0.938895	S001_T1__S072_T0	FALSE	S072	S001	FALSE	Pre-travel	Post-travel	FALSE	Eastern Africa	Southeastern Asia	FALSE
S024_T0	S001_T1	0.972606	S001_T1__S024_T0	FALSE	S024	S001	FALSE	Pre-travel	Post-travel	FALSE	Southern Asia	Southeastern Asia	FALSE
S064_T1	S001_T1	0.664047	S001_T1__S064_T1	FALSE	S064	S001	FALSE	Post-travel	Post-travel	TRUE	Southeastern Asia	Southeastern Asia	TRUE
S182_T0	S001_T1	0.933049	S001_T1__S182_T0	FALSE	S182	S001	FALSE	Pre-travel	Post-travel	FALSE	Northern Africa	Southeastern Asia	FALSE
S190_T1	S001_T1	0.34782	S001_T1__S190_T1	FALSE	S190	S001	FALSE	Post-travel	Post-travel	TRUE	Eastern Africa	Southeastern Asia	FALSE
S032_T0	S001_T1	0.63796	S001_T1__S032_T0	FALSE	S032	S001	FALSE	Pre-travel	Post-travel	FALSE	Southeastern Asia	Southeastern Asia	TRUE
S190_T0	S001_T1	0.644012	S001_T1__S190_T0	FALSE	S190	S001	FALSE	Pre-travel	Post-travel	FALSE	Eastern Africa	Southeastern Asia	FALSE
S035_T1	S001_T1	0.773451	S001_T1__S035_T1	FALSE	S035	S001	FALSE	Post-travel	Post-travel	TRUE	Eastern Africa	Southeastern Asia	FALSE
S154_T1	S001_T1	0.801881	S001_T1__S154_T1	FALSE	S154	S001	FALSE	Post-travel	Post-travel	TRUE	Southern Asia	Southeastern Asia	FALSE
S095_T1	S001_T1	0.716011	S001_T1__S095_T1	FALSE	S095	S001	FALSE	Post-travel	Post-travel	TRUE	Northern Africa	Southeastern Asia	FALSE
S121_T0	S001_T1	0.784582	S001_T1__S121_T0	FALSE	S121	S001	FALSE	Pre-travel	Post-travel	FALSE	Eastern Africa	Southeastern Asia	FALSE
S078_T1	S001_T1	0.730225	S001_T1__S078_T1	FALSE	S078	S001	FALSE	Post-travel	Post-travel	TRUE	Eastern Africa	Southeastern Asia	FALSE
S144_T1	S001_T1	0.485716	S001_T1__S144_T1	FALSE	S144	S001	FALSE	Post-travel	Post-travel	TRUE	Eastern Africa	Southeastern Asia	FALSE
S038_T0	S001_T1	0.848743	S001_T1__S038_T0	FALSE	S038	S001	FALSE	Pre-travel	Post-travel	FALSE	Southeastern Asia	Southeastern Asia	TRUE
S155_T1	S001_T1	0.422069	S001_T1__S155_T1	FALSE	S155	S001	FALSE	Post-travel	Post-travel	TRUE	Southern Asia	Southeastern Asia	FALSE
S124_T1	S001_T1	0.702814	S001_T1__S124_T1	FALSE	S124	S001	FALSE	Post-travel	Post-travel	TRUE	Southeastern Asia	Southeastern Asia	TRUE
S189_T1	S001_T1	0.94146	S001_T1__S189_T1	FALSE	S189	S001	FALSE	Post-travel	Post-travel	TRUE	Northern Africa	Southeastern Asia	FALSE
S115_T0	S001_T1	0.928087	S001_T1__S115_T0	FALSE	S115	S001	FALSE	Pre-travel	Post-travel	FALSE	Southeastern Asia	Southeastern Asia	TRUE
S074_T0	S001_T1	0.775356	S001_T1__S074_T0	FALSE	S074	S001	FALSE	Pre-travel	Post-travel	FALSE	Northern Africa	Southeastern Asia	FALSE
S001_T1	S001_T1	0	S001_T1__S001_T1	TRUE	S001	S001	TRUE	Post-travel	Post-travel	TRUE	Southeastern Asia	Southeastern Asia	TRUE
S147_T1	S001_T1	0.438421	S001_T1__S147_T1	FALSE	S147	S001	FALSE	Post-travel	Post-travel	TRUE	Southern Asia	Southeastern Asia	FALSE
S160_T0	S001_T1	0.528091	S001_T1__S160_T0	FALSE	S160	S001	FALSE	Pre-travel	Post-travel	FALSE	Southeastern Asia	Southeastern Asia	TRUE
S112_T0	S001_T1	0.559858	S001_T1__S112_T0	FALSE	S112	S001	FALSE	Pre-travel	Post-travel	FALSE	Northern Africa	Southeastern Asia	FALSE
S129_T0	S001_T1	0.62601	S001_T1__S129_T0	FALSE	S129	S001	FALSE	Pre-travel	Post-travel	FALSE	Eastern Africa	Southeastern Asia	FALSE
S049_T1	S001_T1	0.7251	S001_T1__S049_T1	FALSE	S049	S001	FALSE	Post-travel	Post-travel	TRUE	Northern Africa	Southeastern Asia	FALSE
S034_T1	S001_T1	0.956005	S001_T1__S034_T1	FALSE	S034	S001	FALSE	Post-travel	Post-travel	TRUE	Southern Asia	Southeastern Asia	FALSE
S168_T1	S001_T1	0.72625	S001_T1__S168_T1	FALSE	S168	S001	FALSE	Post-travel	Post-travel	TRUE	Southern Asia	Southeastern Asia	FALSE
S077_T0	S001_T1	0.950667	S001_T1__S077_T0	FALSE	S077	S001	FALSE	Pre-travel	Post-travel	FALSE	Eastern Africa	Southeastern Asia	FALSE
S132_T0	S001_T1	0.930355	S001_T1__S132_T0	FALSE	S132	S001	FALSE	Pre-travel	Post-travel	FALSE	Northern Africa	Southeastern Asia	FALSE
S005_T1	S001_T1	0.779461	S001_T1__S005_T1	FALSE	S005	S001	FALSE	Post-travel	Post-travel	TRUE	Southern Asia	Southeastern Asia	FALSE
S181_T0	S001_T1	0.743951	S001_T1__S181_T0	FALSE	S181	S001	FALSE	Pre-travel	Post-travel	FALSE	Southern Asia	Southeastern Asia	FALSE
S073_T0	S001_T1	0.95858	S001_T1__S073_T0	FALSE	S073	S001	FALSE	Pre-travel	Post-travel	FALSE	Eastern Africa	Southeastern Asia	FALSE
S007_T1	S001_T1	0.679316	S001_T1__S007_T1	FALSE	S007	S001	FALSE	Post-travel	Post-travel	TRUE	Southern Asia	Southeastern Asia	FALSE
S010_T0	S001_T1	0.952603	S001_T1__S010_T0	FALSE	S010	S001	FALSE	Pre-travel	Post-travel	FALSE	Eastern Africa	Southeastern Asia	FALSE
S089_T0	S001_T1	0.66623	S001_T1__S089_T0	FALSE	S089	S001	FALSE	Pre-travel	Post-travel	FALSE	Eastern Africa	Southeastern Asia	FALSE
S091_T0	S001_T1	0.555552	S001_T1__S091_T0	FALSE	S091	S001	FALSE	Pre-travel	Post-travel	FALSE	Eastern Africa	Southeastern Asia	FALSE
S153_T0	S001_T1	0.354097	S001_T1__S153_T0	FALSE	S153	S001	FALSE	Pre-travel	Post-travel	FALSE	Eastern Africa	Southeastern Asia	FALSE
S156_T0	S001_T1	0.334436	S001_T1__S156_T0	FALSE	S156	S001	FALSE	Pre-travel	Post-travel	FALSE	Southeastern Asia	Southeastern Asia	TRUE
S024_T1	S001_T1	0.896934	S001_T1__S024_T1	FALSE	S024	S001	FALSE	Post-travel	Post-travel	TRUE	Southern Asia	Southeastern Asia	FALSE
S076_T1	S001_T1	0.674874	S001_T1__S076_T1	FALSE	S076	S001	FALSE	Post-travel	Post-travel	TRUE	Southeastern Asia	Southeastern Asia	TRUE
S166_T0	S001_T1	0.867365	S001_T1__S166_T0	FALSE	S166	S001	FALSE	Pre-travel	Post-travel	FALSE	Southern Asia	Southeastern Asia	FALSE
S045_T0	S001_T1	0.947373	S001_T1__S045_T0	FALSE	S045	S001	FALSE	Pre-travel	Post-travel	FALSE	Southern Asia	Southeastern Asia	FALSE
S179_T1	S001_T1	0.328379	S001_T1__S179_T1	FALSE	S179	S001	FALSE	Post-travel	Post-travel	TRUE	Southeastern Asia	Southeastern Asia	TRUE
S103_T0	S001_T1	0.947653	S001_T1__S103_T0	FALSE	S103	S001	FALSE	Pre-travel	Post-travel	FALSE	Northern Africa	Southeastern Asia	FALSE
S178_T0	S001_T1	0.499398	S001_T1__S178_T0	FALSE	S178	S001	FALSE	Pre-travel	Post-travel	FALSE	Eastern Africa	Southeastern Asia	FALSE
S006_T1	S001_T1	0.771278	S001_T1__S006_T1	FALSE	S006	S001	FALSE	Post-travel	Post-travel	TRUE	Southern Asia	Southeastern Asia	FALSE
S042_T0	S001_T1	0.602142	S001_T1__S042_T0	FALSE	S042	S001	FALSE	Pre-travel	Post-travel	FALSE	Eastern Africa	Southeastern Asia	FALSE
S018_T0	S001_T1	0.875151	S001_T1__S018_T0	FALSE	S018	S001	FALSE	Pre-travel	Post-travel	FALSE	Eastern Africa	Southeastern Asia	FALSE
S030_T1	S001_T1	0.231407	S001_T1__S030_T1	FALSE	S030	S001	FALSE	Post-travel	Post-travel	TRUE	Southeastern Asia	Southeastern Asia	TRUE
S055_T1	S001_T1	0.621997	S001_T1__S055_T1	FALSE	S055	S001	FALSE	Post-travel	Post-travel	TRUE	Eastern Africa	Southeastern Asia	FALSE
S128_T1	S001_T1	0.609054	S001_T1__S128_T1	FALSE	S128	S001	FALSE	Post-travel	Post-travel	TRUE	Northern Africa	Southeastern Asia	FALSE
S010_T1	S001_T1	0.970536	S001_T1__S010_T1	FALSE	S010	S001	FALSE	Post-travel	Post-travel	TRUE	Eastern Africa	Southeastern Asia	FALSE
S170_T1	S001_T1	0.507095	S001_T1__S170_T1	FALSE	S170	S001	FALSE	Post-travel	Post-travel	TRUE	Southeastern Asia	Southeastern Asia	TRUE
S062_T0	S001_T1	0.910835	S001_T1__S062_T0	FALSE	S062	S001	FALSE	Pre-travel	Post-travel	FALSE	Eastern Africa	Southeastern Asia	FALSE
S151_T0	S001_T1	0.573746	S001_T1__S151_T0	FALSE	S151	S001	FALSE	Pre-travel	Post-travel	FALSE	Southern Asia	Southeastern Asia	FALSE
S152_T0	S001_T1	0.835596	S001_T1__S152_T0	FALSE	S152	S001	FALSE	Pre-travel	Post-travel	FALSE	Eastern Africa	Southeastern Asia	FALSE
S111_T0	S001_T1	0.956636	S001_T1__S111_T0	FALSE	S111	S001	FALSE	Pre-travel	Post-travel	FALSE	Northern Africa	Southeastern Asia	FALSE
S040_T0	S001_T1	0.833474	S001_T1__S040_T0	FALSE	S040	S001	FALSE	Pre-travel	Post-travel	FALSE	Northern Africa	Southeastern Asia	FALSE
S189_T0	S001_T1	0.918232	S001_T1__S189_T0	FALSE	S189	S001	FALSE	Pre-travel	Post-travel	FALSE	Northern Africa	Southeastern Asia	FALSE
S060_T1	S001_T1	0.795286	S001_T1__S060_T1	FALSE	S060	S001	FALSE	Post-travel	Post-travel	TRUE	Eastern Africa	Southeastern Asia	FALSE
S139_T1	S001_T1	0.242268	S001_T1__S139_T1	FALSE	S139	S001	FALSE	Post-travel	Post-travel	TRUE	Southeastern Asia	Southeastern Asia	TRUE
S128_T0	S001_T1	0.453152	S001_T1__S128_T0	FALSE	S128	S001	FALSE	Pre-travel	Post-travel	FALSE	Northern Africa	Southeastern Asia	FALSE
S118_T0	S001_T1	0.590251	S001_T1__S118_T0	FALSE	S118	S001	FALSE	Pre-travel	Post-travel	FALSE	Southern Asia	Southeastern Asia	FALSE
S184_T1	S001_T1	0.711434	S001_T1__S184_T1	FALSE	S184	S001	FALSE	Post-travel	Post-travel	TRUE	Northern Africa	Southeastern Asia	FALSE
S025_T0	S001_T1	0.356461	S001_T1__S025_T0	FALSE	S025	S001	FALSE	Pre-travel	Post-travel	FALSE	Southern Asia	Southeastern Asia	FALSE
S088_T0	S001_T1	0.52514	S001_T1__S088_T0	FALSE	S088	S001	FALSE	Pre-travel	Post-travel	FALSE	Eastern Africa	Southeastern Asia	FALSE
S109_T0	S001_T1	0.883678	S001_T1__S109_T0	FALSE	S109	S001	FALSE	Pre-travel	Post-travel	FALSE	Southern Asia	Southeastern Asia	FALSE
S048_T1	S001_T1	0.400915	S001_T1__S048_T1	FALSE	S048	S001	FALSE	Post-travel	Post-travel	TRUE	Northern Africa	Southeastern Asia	FALSE
S041_T0	S001_T1	0.515131	S001_T1__S041_T0	FALSE	S041	S001	FALSE	Pre-travel	Post-travel	FALSE	Southern Asia	Southeastern Asia	FALSE
S011_T0	S001_T1	0.78123	S001_T1__S011_T0	FALSE	S011	S001	FALSE	Pre-travel	Post-travel	FALSE	Southeastern Asia	Southeastern Asia	TRUE
S153_T1	S001_T1	0.494822	S001_T1__S153_T1	FALSE	S153	S001	FALSE	Post-travel	Post-travel	TRUE	Eastern Africa	Southeastern Asia	FALSE
S176_T1	S001_T1	0.408299	S001_T1__S176_T1	FALSE	S176	S001	FALSE	Post-travel	Post-travel	TRUE	Northern Africa	Southeastern Asia	FALSE
S130_T0	S001_T1	0.497999	S001_T1__S130_T0	FALSE	S130	S001	FALSE	Pre-travel	Post-travel	FALSE	Southeastern Asia	Southeastern Asia	TRUE
S074_T1	S001_T1	0.882013	S001_T1__S074_T1	FALSE	S074	S001	FALSE	Post-travel	Post-travel	TRUE	Northern Africa	Southeastern Asia	FALSE
S149_T0	S001_T1	0.41743	S001_T1__S149_T0	FALSE	S149	S001	FALSE	Pre-travel	Post-travel	FALSE	Eastern Africa	Southeastern Asia	FALSE
S027_T1	S001_T1	0.787425	S001_T1__S027_T1	FALSE	S027	S001	FALSE	Post-travel	Post-travel	TRUE	Eastern Africa	Southeastern Asia	FALSE
S055_T0	S001_T1	0.606143	S001_T1__S055_T0	FALSE	S055	S001	FALSE	Pre-travel	Post-travel	FALSE	Eastern Africa	Southeastern Asia	FALSE
S108_T1	S001_T1	0.213009	S001_T1__S108_T1	FALSE	S108	S001	FALSE	Post-travel	Post-travel	TRUE	Southern Asia	Southeastern Asia	FALSE
S035_T0	S001_T1	0.768245	S001_T1__S035_T0	FALSE	S035	S001	FALSE	Pre-travel	Post-travel	FALSE	Eastern Africa	Southeastern Asia	FALSE
S086_T0	S001_T1	0.939002	S001_T1__S086_T0	FALSE	S086	S001	FALSE	Pre-travel	Post-travel	FALSE	Northern Africa	Southeastern Asia	FALSE
S106_T1	S001_T1	0.799278	S001_T1__S106_T1	FALSE	S106	S001	FALSE	Post-travel	Post-travel	TRUE	Southeastern Asia	Southeastern Asia	TRUE
S016_T0	S001_T1	0.944496	S001_T1__S016_T0	FALSE	S016	S001	FALSE	Pre-travel	Post-travel	FALSE	Northern Africa	Southeastern Asia	FALSE
S037_T0	S001_T1	0.735051	S001_T1__S037_T0	FALSE	S037	S001	FALSE	Pre-travel	Post-travel	FALSE	Southeastern Asia	Southeastern Asia	TRUE
S041_T1	S001_T1	0.43698	S001_T1__S041_T1	FALSE	S041	S001	FALSE	Post-travel	Post-travel	TRUE	Southern Asia	Southeastern Asia	FALSE
S171_T1	S001_T1	0.486902	S001_T1__S171_T1	FALSE	S171	S001	FALSE	Post-travel	Post-travel	TRUE	Southeastern Asia	Southeastern Asia	TRUE
S186_T1	S001_T1	0.578795	S001_T1__S186_T1	FALSE	S186	S001	FALSE	Post-travel	Post-travel	TRUE	Southern Asia	Southeastern Asia	FALSE
S122_T1	S001_T1	0.435891	S001_T1__S122_T1	FALSE	S122	S001	FALSE	Post-travel	Post-travel	TRUE	Southeastern Asia	Southeastern Asia	TRUE
S004_T0	S001_T1	0.950947	S001_T1__S004_T0	FALSE	S004	S001	FALSE	Pre-travel	Post-travel	FALSE	Southeastern Asia	Southeastern Asia	TRUE
S096_T0	S001_T1	0.495405	S001_T1__S096_T0	FALSE	S096	S001	FALSE	Pre-travel	Post-travel	FALSE	Eastern Africa	Southeastern Asia	FALSE
S054_T0	S001_T1	0.787226	S001_T1__S054_T0	FALSE	S054	S001	FALSE	Pre-travel	Post-travel	FALSE	Northern Africa	Southeastern Asia	FALSE
S109_T1	S001_T1	0.547332	S001_T1__S109_T1	FALSE	S109	S001	FALSE	Post-travel	Post-travel	TRUE	Southern Asia	Southeastern Asia	FALSE
S066_T0	S001_T1	0.959244	S001_T1__S066_T0	FALSE	S066	S001	FALSE	Pre-travel	Post-travel	FALSE	Eastern Africa	Southeastern Asia	FALSE
S125_T0	S001_T1	0.344882	S001_T1__S125_T0	FALSE	S125	S001	FALSE	Pre-travel	Post-travel	FALSE	Southern Asia	Southeastern Asia	FALSE
S076_T0	S001_T1	0.912553	S001_T1__S076_T0	FALSE	S076	S001	FALSE	Pre-travel	Post-travel	FALSE	Southeastern Asia	Southeastern Asia	TRUE
S175_T0	S001_T1	0.802968	S001_T1__S175_T0	FALSE	S175	S001	FALSE	Pre-travel	Post-travel	FALSE	Northern Africa	Southeastern Asia	FALSE
S005_T0	S001_T1	0.931932	S001_T1__S005_T0	FALSE	S005	S001	FALSE	Pre-travel	Post-travel	FALSE	Southern Asia	Southeastern Asia	FALSE
S175_T1	S001_T1	0.643098	S001_T1__S175_T1	FALSE	S175	S001	FALSE	Post-travel	Post-travel	TRUE	Northern Africa	Southeastern Asia	FALSE
S165_T0	S001_T1	0.599575	S001_T1__S165_T0	FALSE	S165	S001	FALSE	Pre-travel	Post-travel	FALSE	Southern Asia	Southeastern Asia	FALSE
S078_T0	S001_T1	0.955096	S001_T1__S078_T0	FALSE	S078	S001	FALSE	Pre-travel	Post-travel	FALSE	Eastern Africa	Southeastern Asia	FALSE
S036_T0	S001_T1	0.508003	S001_T1__S036_T0	FALSE	S036	S001	FALSE	Pre-travel	Post-travel	FALSE	Southeastern Asia	Southeastern Asia	TRUE
S154_T0	S001_T1	0.832213	S001_T1__S154_T0	FALSE	S154	S001	FALSE	Pre-travel	Post-travel	FALSE	Southern Asia	Southeastern Asia	FALSE
S083_T0	S001_T1	0.946073	S001_T1__S083_T0	FALSE	S083	S001	FALSE	Pre-travel	Post-travel	FALSE	Northern Africa	Southeastern Asia	FALSE
S152_T1	S001_T1	0.355028	S001_T1__S152_T1	FALSE	S152	S001	FALSE	Post-travel	Post-travel	TRUE	Eastern Africa	Southeastern Asia	FALSE
S058_T1	S001_T1	0.888927	S001_T1__S058_T1	FALSE	S058	S001	FALSE	Post-travel	Post-travel	TRUE	Southern Asia	Southeastern Asia	FALSE
S096_T1	S001_T1	0.753127	S001_T1__S096_T1	FALSE	S096	S001	FALSE	Post-travel	Post-travel	TRUE	Eastern Africa	Southeastern Asia	FALSE
S126_T1	S001_T1	0.779071	S001_T1__S126_T1	FALSE	S126	S001	FALSE	Post-travel	Post-travel	TRUE	Southeastern Asia	Southeastern Asia	TRUE
S166_T1	S001_T1	0.935067	S001_T1__S166_T1	FALSE	S166	S001	FALSE	Post-travel	Post-travel	TRUE	Southern Asia	Southeastern Asia	FALSE
S027_T0	S001_T1	0.943295	S001_T1__S027_T0	FALSE	S027	S001	FALSE	Pre-travel	Post-travel	FALSE	Eastern Africa	Southeastern Asia	FALSE
S012_T0	S001_T1	0.32812	S001_T1__S012_T0	FALSE	S012	S001	FALSE	Pre-travel	Post-travel	FALSE	Eastern Africa	Southeastern Asia	FALSE
S126_T0	S001_T1	0.806976	S001_T1__S126_T0	FALSE	S126	S001	FALSE	Pre-travel	Post-travel	FALSE	Southeastern Asia	Southeastern Asia	TRUE
S183_T0	S001_T1	0.834295	S001_T1__S183_T0	FALSE	S183	S001	FALSE	Pre-travel	Post-travel	FALSE	Southern Asia	Southeastern Asia	FALSE
S157_T0	S001_T1	0.567314	S001_T1__S157_T0	FALSE	S157	S001	FALSE	Pre-travel	Post-travel	FALSE	Southeastern Asia	Southeastern Asia	TRUE
S051_T1	S001_T1	0.909461	S001_T1__S051_T1	FALSE	S051	S001	FALSE	Post-travel	Post-travel	TRUE	Southern Asia	Southeastern Asia	FALSE
S020_T0	S001_T1	0.780761	S001_T1__S020_T0	FALSE	S020	S001	FALSE	Pre-travel	Post-travel	FALSE	Southeastern Asia	Southeastern Asia	TRUE
S047_T0	S001_T1	0.957076	S001_T1__S047_T0	FALSE	S047	S001	FALSE	Pre-travel	Post-travel	FALSE	Southern Asia	Southeastern Asia	FALSE
S125_T1	S001_T1	0.576386	S001_T1__S125_T1	FALSE	S125	S001	FALSE	Post-travel	Post-travel	TRUE	Southern Asia	Southeastern Asia	FALSE
S081_T0	S001_T1	0.919468	S001_T1__S081_T0	FALSE	S081	S001	FALSE	Pre-travel	Post-travel	FALSE	Southeastern Asia	Southeastern Asia	TRUE
S089_T1	S001_T1	0.510744	S001_T1__S089_T1	FALSE	S089	S001	FALSE	Post-travel	Post-travel	TRUE	Eastern Africa	Southeastern Asia	FALSE
S081_T1	S001_T1	0.923821	S001_T1__S081_T1	FALSE	S081	S001	FALSE	Post-travel	Post-travel	TRUE	Southeastern Asia	Southeastern Asia	TRUE
S137_T0	S001_T1	0.345759	S001_T1__S137_T0	FALSE	S137	S001	FALSE	Pre-travel	Post-travel	FALSE	Southern Asia	Southeastern Asia	FALSE
S123_T1	S001_T1	0.796446	S001_T1__S123_T1	FALSE	S123	S001	FALSE	Post-travel	Post-travel	TRUE	Eastern Africa	Southeastern Asia	FALSE
S019_T0	S001_T1	0.939292	S001_T1__S019_T0	FALSE	S019	S001	FALSE	Pre-travel	Post-travel	FALSE	Northern Africa	Southeastern Asia	FALSE
S158_T0	S001_T1	0.83705	S001_T1__S158_T0	FALSE	S158	S001	FALSE	Pre-travel	Post-travel	FALSE	Southern Asia	Southeastern Asia	FALSE
S042_T1	S001_T1	0.45947	S001_T1__S042_T1	FALSE	S042	S001	FALSE	Post-travel	Post-travel	TRUE	Eastern Africa	Southeastern Asia	FALSE
S031_T1	S001_T1	0.606399	S001_T1__S031_T1	FALSE	S031	S001	FALSE	Post-travel	Post-travel	TRUE	Southern Asia	Southeastern Asia	FALSE
S150_T1	S001_T1	0.457465	S001_T1__S150_T1	FALSE	S150	S001	FALSE	Post-travel	Post-travel	TRUE	Northern Africa	Southeastern Asia	FALSE
S004_T1	S001_T1	0.70729	S001_T1__S004_T1	FALSE	S004	S001	FALSE	Post-travel	Post-travel	TRUE	Southeastern Asia	Southeastern Asia	TRUE
S063_T0	S001_T1	0.423775	S001_T1__S063_T0	FALSE	S063	S001	FALSE	Pre-travel	Post-travel	FALSE	Southeastern Asia	Southeastern Asia	TRUE
S110_T0	S001_T1	0.360505	S001_T1__S110_T0	FALSE	S110	S001	FALSE	Pre-travel	Post-travel	FALSE	Southeastern Asia	Southeastern Asia	TRUE
S064_T0	S001_T1	0.544088	S001_T1__S064_T0	FALSE	S064	S001	FALSE	Pre-travel	Post-travel	FALSE	Southeastern Asia	Southeastern Asia	TRUE
S103_T1	S001_T1	0.437729	S001_T1__S103_T1	FALSE	S103	S001	FALSE	Post-travel	Post-travel	TRUE	Northern Africa	Southeastern Asia	FALSE
S143_T1	S001_T1	0.321326	S001_T1__S143_T1	FALSE	S143	S001	FALSE	Post-travel	Post-travel	TRUE	Eastern Africa	Southeastern Asia	FALSE
S030_T0	S001_T1	0.496273	S001_T1__S030_T0	FALSE	S030	S001	FALSE	Pre-travel	Post-travel	FALSE	Southeastern Asia	Southeastern Asia	TRUE
S138_T0	S001_T1	0.516564	S001_T1__S138_T0	FALSE	S138	S001	FALSE	Pre-travel	Post-travel	FALSE	Southern Asia	Southeastern Asia	FALSE
S121_T1	S001_T1	0.470821	S001_T1__S121_T1	FALSE	S121	S001	FALSE	Post-travel	Post-travel	TRUE	Eastern Africa	Southeastern Asia	FALSE
S099_T1	S001_T1	0.48492	S001_T1__S099_T1	FALSE	S099	S001	FALSE	Post-travel	Post-travel	TRUE	Southern Asia	Southeastern Asia	FALSE
S043_T0	S001_T1	0.868716	S001_T1__S043_T0	FALSE	S043	S001	FALSE	Pre-travel	Post-travel	FALSE	Southeastern Asia	Southeastern Asia	TRUE
S033_T0	S001_T1	0.952777	S001_T1__S033_T0	FALSE	S033	S001	FALSE	Pre-travel	Post-travel	FALSE	Southern Asia	Southeastern Asia	FALSE
S017_T1	S001_T1	0.305185	S001_T1__S017_T1	FALSE	S017	S001	FALSE	Post-travel	Post-travel	TRUE	Southern Asia	Southeastern Asia	FALSE
S032_T1	S001_T1	0.56709	S001_T1__S032_T1	FALSE	S032	S001	FALSE	Post-travel	Post-travel	TRUE	Southeastern Asia	Southeastern Asia	TRUE
S131_T0	S001_T1	0.813955	S001_T1__S131_T0	FALSE	S131	S001	FALSE	Pre-travel	Post-travel	FALSE	Northern Africa	Southeastern Asia	FALSE
S148_T0	S001_T1	0.338258	S001_T1__S148_T0	FALSE	S148	S001	FALSE	Pre-travel	Post-travel	FALSE	Northern Africa	Southeastern Asia	FALSE
S057_T1	S001_T1	0.892789	S001_T1__S057_T1	FALSE	S057	S001	FALSE	Post-travel	Post-travel	TRUE	Southern Asia	Southeastern Asia	FALSE
S082_T1	S001_T1	0.94479	S001_T1__S082_T1	FALSE	S082	S001	FALSE	Post-travel	Post-travel	TRUE	Northern Africa	Southeastern Asia	FALSE
S186_T0	S001_T1	0.685679	S001_T1__S186_T0	FALSE	S186	S001	FALSE	Pre-travel	Post-travel	FALSE	Southern Asia	Southeastern Asia	FALSE
S146_T1	S001_T1	0.702538	S001_T1__S146_T1	FALSE	S146	S001	FALSE	Post-travel	Post-travel	TRUE	Northern Africa	Southeastern Asia	FALSE
S098_T1	S001_T1	0.344093	S001_T1__S098_T1	FALSE	S098	S001	FALSE	Post-travel	Post-travel	TRUE	Eastern Africa	Southeastern Asia	FALSE
S034_T0	S001_T1	0.950733	S001_T1__S034_T0	FALSE	S034	S001	FALSE	Pre-travel	Post-travel	FALSE	Southern Asia	Southeastern Asia	FALSE
S141_T1	S001_T1	0.385846	S001_T1__S141_T1	FALSE	S141	S001	FALSE	Post-travel	Post-travel	TRUE	Eastern Africa	Southeastern Asia	FALSE
S098_T0	S001_T1	0.932289	S001_T1__S098_T0	FALSE	S098	S001	FALSE	Pre-travel	Post-travel	FALSE	Eastern Africa	Southeastern Asia	FALSE
S092_T1	S001_T1	0.362158	S001_T1__S092_T1	FALSE	S092	S001	FALSE	Post-travel	Post-travel	TRUE	Northern Africa	Southeastern Asia	FALSE
S094_T0	S001_T1	0.950555	S001_T1__S094_T0	FALSE	S094	S001	FALSE	Pre-travel	Post-travel	FALSE	Northern Africa	Southeastern Asia	FALSE
S049_T0	S001_T1	0.519445	S001_T1__S049_T0	FALSE	S049	S001	FALSE	Pre-travel	Post-travel	FALSE	Northern Africa	Southeastern Asia	FALSE
S132_T1	S001_T1	0.872741	S001_T1__S132_T1	FALSE	S132	S001	FALSE	Post-travel	Post-travel	TRUE	Northern Africa	Southeastern Asia	FALSE
S133_T0	S001_T1	0.86578	S001_T1__S133_T0	FALSE	S133	S001	FALSE	Pre-travel	Post-travel	FALSE	Southeastern Asia	Southeastern Asia	TRUE
S140_T1	S001_T1	0.208681	S001_T1__S140_T1	FALSE	S140	S001	FALSE	Post-travel	Post-travel	TRUE	Southeastern Asia	Southeastern Asia	TRUE
S058_T0	S001_T1	0.943206	S001_T1__S058_T0	FALSE	S058	S001	FALSE	Pre-travel	Post-travel	FALSE	Southern Asia	Southeastern Asia	FALSE
S071_T1	S001_T1	0.352438	S001_T1__S071_T1	FALSE	S071	S001	FALSE	Post-travel	Post-travel	TRUE	Southeastern Asia	Southeastern Asia	TRUE
S185_T0	S001_T1	0.766353	S001_T1__S185_T0	FALSE	S185	S001	FALSE	Pre-travel	Post-travel	FALSE	Southeastern Asia	Southeastern Asia	TRUE
S127_T1	S001_T1	0.590857	S001_T1__S127_T1	FALSE	S127	S001	FALSE	Post-travel	Post-travel	TRUE	Southeastern Asia	Southeastern Asia	TRUE
S013_T0	S001_T1	0.958009	S001_T1__S013_T0	FALSE	S013	S001	FALSE	Pre-travel	Post-travel	FALSE	Eastern Africa	Southeastern Asia	FALSE
S112_T1	S001_T1	0.78909	S001_T1__S112_T1	FALSE	S112	S001	FALSE	Post-travel	Post-travel	TRUE	Northern Africa	Southeastern Asia	FALSE
S114_T0	S001_T1	0.305597	S001_T1__S114_T0	FALSE	S114	S001	FALSE	Pre-travel	Post-travel	FALSE	Eastern Africa	Southeastern Asia	FALSE
S069_T1	S001_T1	0.872409	S001_T1__S069_T1	FALSE	S069	S001	FALSE	Post-travel	Post-travel	TRUE	Southern Asia	Southeastern Asia	FALSE
S170_T0	S001_T1	0.966196	S001_T1__S170_T0	FALSE	S170	S001	FALSE	Pre-travel	Post-travel	FALSE	Southeastern Asia	Southeastern Asia	TRUE
S114_T1	S001_T1	0.35343	S001_T1__S114_T1	FALSE	S114	S001	FALSE	Post-travel	Post-travel	TRUE	Eastern Africa	Southeastern Asia	FALSE
S039_T0	S001_T1	0.944965	S001_T1__S039_T0	FALSE	S039	S001	FALSE	Pre-travel	Post-travel	FALSE	Northern Africa	Southeastern Asia	FALSE
S087_T0	S001_T1	0.540099	S001_T1__S087_T0	FALSE	S087	S001	FALSE	Pre-travel	Post-travel	FALSE	Eastern Africa	Southeastern Asia	FALSE
S014_T0	S001_T1	0.675587	S001_T1__S014_T0	FALSE	S014	S001	FALSE	Pre-travel	Post-travel	FALSE	Northern Africa	Southeastern Asia	FALSE
S110_T1	S001_T1	0.389394	S001_T1__S110_T1	FALSE	S110	S001	FALSE	Post-travel	Post-travel	TRUE	Southeastern Asia	Southeastern Asia	TRUE
S143_T0	S001_T1	0.461279	S001_T1__S143_T0	FALSE	S143	S001	FALSE	Pre-travel	Post-travel	FALSE	Eastern Africa	Southeastern Asia	FALSE
S129_T1	S001_T1	0.776648	S001_T1__S129_T1	FALSE	S129	S001	FALSE	Post-travel	Post-travel	TRUE	Eastern Africa	Southeastern Asia	FALSE
S102_T1	S001_T1	0.695304	S001_T1__S102_T1	FALSE	S102	S001	FALSE	Post-travel	Post-travel	TRUE	Southeastern Asia	Southeastern Asia	TRUE
S054_T1	S001_T1	0.596796	S001_T1__S054_T1	FALSE	S054	S001	FALSE	Post-travel	Post-travel	TRUE	Northern Africa	Southeastern Asia	FALSE
S117_T1	S001_T1	0.564346	S001_T1__S117_T1	FALSE	S117	S001	FALSE	Post-travel	Post-travel	TRUE	Southeastern Asia	Southeastern Asia	TRUE
S079_T0	S001_T1	0.698473	S001_T1__S079_T0	FALSE	S079	S001	FALSE	Pre-travel	Post-travel	FALSE	Southern Asia	Southeastern Asia	FALSE
S142_T0	S001_T1	0.621332	S001_T1__S142_T0	FALSE	S142	S001	FALSE	Pre-travel	Post-travel	FALSE	Eastern Africa	Southeastern Asia	FALSE
S097_T0	S001_T1	0.952262	S001_T1__S097_T0	FALSE	S097	S001	FALSE	Pre-travel	Post-travel	FALSE	Eastern Africa	Southeastern Asia	FALSE
S091_T1	S001_T1	0.919851	S001_T1__S091_T1	FALSE	S091	S001	FALSE	Post-travel	Post-travel	TRUE	Eastern Africa	Southeastern Asia	FALSE
S061_T0	S001_T1	0.948258	S001_T1__S061_T0	FALSE	S061	S001	FALSE	Pre-travel	Post-travel	FALSE	Southeastern Asia	Southeastern Asia	TRUE
S162_T0	S001_T1	0.593279	S001_T1__S162_T0	FALSE	S162	S001	FALSE	Pre-travel	Post-travel	FALSE	Northern Africa	Southeastern Asia	FALSE
S139_T0	S001_T1	0.954818	S001_T1__S139_T0	FALSE	S139	S001	FALSE	Pre-travel	Post-travel	FALSE	Southeastern Asia	Southeastern Asia	TRUE
S133_T1	S001_T1	0.579209	S001_T1__S133_T1	FALSE	S133	S001	FALSE	Post-travel	Post-travel	TRUE	Southeastern Asia	Southeastern Asia	TRUE
S069_T0	S001_T1	0.950671	S001_T1__S069_T0	FALSE	S069	S001	FALSE	Pre-travel	Post-travel	FALSE	Southern Asia	Southeastern Asia	FALSE
S127_T0	S001_T1	0.940309	S001_T1__S127_T0	FALSE	S127	S001	FALSE	Pre-travel	Post-travel	FALSE	Southeastern Asia	Southeastern Asia	TRUE
S059_T0	S001_T1	0.787331	S001_T1__S059_T0	FALSE	S059	S001	FALSE	Pre-travel	Post-travel	FALSE	Southeastern Asia	Southeastern Asia	TRUE
S008_T1	S001_T1	0.856545	S001_T1__S008_T1	FALSE	S008	S001	FALSE	Post-travel	Post-travel	TRUE	Northern Africa	Southeastern Asia	FALSE
S080_T1	S001_T1	0.772763	S001_T1__S080_T1	FALSE	S080	S001	FALSE	Post-travel	Post-travel	TRUE	Southeastern Asia	Southeastern Asia	TRUE
S180_T0	S001_T1	0.922091	S001_T1__S180_T0	FALSE	S180	S001	FALSE	Pre-travel	Post-travel	FALSE	Southern Asia	Southeastern Asia	FALSE
S020_T1	S001_T1	0.256918	S001_T1__S020_T1	FALSE	S020	S001	FALSE	Post-travel	Post-travel	TRUE	Southeastern Asia	Southeastern Asia	TRUE
S157_T1	S001_T1	0.889824	S001_T1__S157_T1	FALSE	S157	S001	FALSE	Post-travel	Post-travel	TRUE	Southeastern Asia	Southeastern Asia	TRUE
S174_T1	S001_T1	0.499817	S001_T1__S174_T1	FALSE	S174	S001	FALSE	Post-travel	Post-travel	TRUE	Southeastern Asia	Southeastern Asia	TRUE
S052_T0	S001_T1	0.675548	S001_T1__S052_T0	FALSE	S052	S001	FALSE	Pre-travel	Post-travel	FALSE	Southeastern Asia	Southeastern Asia	TRUE
S115_T1	S001_T1	0.936487	S001_T1__S115_T1	FALSE	S115	S001	FALSE	Post-travel	Post-travel	TRUE	Southeastern Asia	Southeastern Asia	TRUE
S036_T1	S001_T1	0.332682	S001_T1__S036_T1	FALSE	S036	S001	FALSE	Post-travel	Post-travel	TRUE	Southeastern Asia	Southeastern Asia	TRUE
S060_T0	S001_T1	0.954858	S001_T1__S060_T0	FALSE	S060	S001	FALSE	Pre-travel	Post-travel	FALSE	Eastern Africa	Southeastern Asia	FALSE
S188_T0	S001_T1	0.439122	S001_T1__S188_T0	FALSE	S188	S001	FALSE	Pre-travel	Post-travel	FALSE	Northern Africa	Southeastern Asia	FALSE
S169_T0	S001_T1	0.383264	S001_T1__S169_T0	FALSE	S169	S001	FALSE	Pre-travel	Post-travel	FALSE	Southern Asia	Southeastern Asia	FALSE
S108_T0	S001_T1	0.602311	S001_T1__S108_T0	FALSE	S108	S001	FALSE	Pre-travel	Post-travel	FALSE	Southern Asia	Southeastern Asia	FALSE
S123_T0	S001_T1	0.670397	S001_T1__S123_T0	FALSE	S123	S001	FALSE	Pre-travel	Post-travel	FALSE	Eastern Africa	Southeastern Asia	FALSE
S044_T1	S001_T1	0.376776	S001_T1__S044_T1	FALSE	S044	S001	FALSE	Post-travel	Post-travel	TRUE	Southeastern Asia	Southeastern Asia	TRUE
S084_T1	S001_T1	0.942464	S001_T1__S084_T1	FALSE	S084	S001	FALSE	Post-travel	Post-travel	TRUE	Southeastern Asia	Southeastern Asia	TRUE
S023_T0	S001_T1	0.623607	S001_T1__S023_T0	FALSE	S023	S001	FALSE	Pre-travel	Post-travel	FALSE	Southern Asia	Southeastern Asia	FALSE
S102_T0	S001_T1	0.646184	S001_T1__S102_T0	FALSE	S102	S001	FALSE	Pre-travel	Post-travel	FALSE	Southeastern Asia	Southeastern Asia	TRUE
S023_T1	S001_T1	0.459755	S001_T1__S023_T1	FALSE	S023	S001	FALSE	Post-travel	Post-travel	TRUE	Southern Asia	Southeastern Asia	FALSE
S159_T0	S001_T1	0.612862	S001_T1__S159_T0	FALSE	S159	S001	FALSE	Pre-travel	Post-travel	FALSE	Southern Asia	Southeastern Asia	FALSE
S046_T1	S001_T1	0.840507	S001_T1__S046_T1	FALSE	S046	S001	FALSE	Post-travel	Post-travel	TRUE	Southern Asia	Southeastern Asia	FALSE
S095_T0	S001_T1	0.927124	S001_T1__S095_T0	FALSE	S095	S001	FALSE	Pre-travel	Post-travel	FALSE	Northern Africa	Southeastern Asia	FALSE
S033_T1	S001_T1	0.753268	S001_T1__S033_T1	FALSE	S033	S001	FALSE	Post-travel	Post-travel	TRUE	Southern Asia	Southeastern Asia	FALSE
S167_T0	S001_T1	0.954071	S001_T1__S167_T0	FALSE	S167	S001	FALSE	Pre-travel	Post-travel	FALSE	Eastern Africa	Southeastern Asia	FALSE
S093_T0	S001_T1	0.492141	S001_T1__S093_T0	FALSE	S093	S001	FALSE	Pre-travel	Post-travel	FALSE	Northern Africa	Southeastern Asia	FALSE
S084_T0	S001_T1	0.953178	S001_T1__S084_T0	FALSE	S084	S001	FALSE	Pre-travel	Post-travel	FALSE	Southeastern Asia	Southeastern Asia	TRUE
S163_T0	S001_T1	0.814734	S001_T1__S163_T0	FALSE	S163	S001	FALSE	Pre-travel	Post-travel	FALSE	Northern Africa	Southeastern Asia	FALSE
S021_T0	S001_T1	0.529576	S001_T1__S021_T0	FALSE	S021	S001	FALSE	Pre-travel	Post-travel	FALSE	Northern Africa	Southeastern Asia	FALSE
S053_T0	S001_T1	0.411558	S001_T1__S053_T0	FALSE	S053	S001	FALSE	Pre-travel	Post-travel	FALSE	Northern Africa	Southeastern Asia	FALSE
S101_T0	S001_T1	0.447093	S001_T1__S101_T0	FALSE	S101	S001	FALSE	Pre-travel	Post-travel	FALSE	Southeastern Asia	Southeastern Asia	TRUE
S070_T1	S001_T1	0.415906	S001_T1__S070_T1	FALSE	S070	S001	FALSE	Post-travel	Post-travel	TRUE	Southern Asia	Southeastern Asia	FALSE
S120_T0	S001_T1	0.598521	S001_T1__S120_T0	FALSE	S120	S001	FALSE	Pre-travel	Post-travel	FALSE	Southern Asia	Southeastern Asia	FALSE
S092_T0	S001_T1	0.478733	S001_T1__S092_T0	FALSE	S092	S001	FALSE	Pre-travel	Post-travel	FALSE	Northern Africa	Southeastern Asia	FALSE
S073_T1	S001_T1	0.701029	S001_T1__S073_T1	FALSE	S073	S001	FALSE	Post-travel	Post-travel	TRUE	Eastern Africa	Southeastern Asia	FALSE
S122_T0	S001_T1	0.461548	S001_T1__S122_T0	FALSE	S122	S001	FALSE	Pre-travel	Post-travel	FALSE	Southeastern Asia	Southeastern Asia	TRUE
S070_T0	S001_T1	0.446343	S001_T1__S070_T0	FALSE	S070	S001	FALSE	Pre-travel	Post-travel	FALSE	Southern Asia	Southeastern Asia	FALSE
S177_T1	S001_T1	0.288708	S001_T1__S177_T1	FALSE	S177	S001	FALSE	Post-travel	Post-travel	TRUE	Southeastern Asia	Southeastern Asia	TRUE
S068_T0	S001_T1	0.436675	S001_T1__S068_T0	FALSE	S068	S001	FALSE	Pre-travel	Post-travel	FALSE	Eastern Africa	Southeastern Asia	FALSE
S016_T1	S001_T1	0.680957	S001_T1__S016_T1	FALSE	S016	S001	FALSE	Post-travel	Post-travel	TRUE	Northern Africa	Southeastern Asia	FALSE
S082_T0	S001_T1	0.943897	S001_T1__S082_T0	FALSE	S082	S001	FALSE	Pre-travel	Post-travel	FALSE	Northern Africa	Southeastern Asia	FALSE
S066_T1	S001_T1	0.468947	S001_T1__S066_T1	FALSE	S066	S001	FALSE	Post-travel	Post-travel	TRUE	Eastern Africa	Southeastern Asia	FALSE
S080_T0	S001_T1	0.917223	S001_T1__S080_T0	FALSE	S080	S001	FALSE	Pre-travel	Post-travel	FALSE	Southeastern Asia	Southeastern Asia	TRUE
S164_T0	S001_T1	0.936322	S001_T1__S164_T0	FALSE	S164	S001	FALSE	Pre-travel	Post-travel	FALSE	Southeastern Asia	Southeastern Asia	TRUE
S163_T1	S001_T1	0.942363	S001_T1__S163_T1	FALSE	S163	S001	FALSE	Post-travel	Post-travel	TRUE	Northern Africa	Southeastern Asia	FALSE
S085_T0	S001_T1	0.926419	S001_T1__S085_T0	FALSE	S085	S001	FALSE	Pre-travel	Post-travel	FALSE	Southern Asia	Southeastern Asia	FALSE
S142_T1	S001_T1	0.411033	S001_T1__S142_T1	FALSE	S142	S001	FALSE	Post-travel	Post-travel	TRUE	Eastern Africa	Southeastern Asia	FALSE
S119_T1	S001_T1	0.437972	S001_T1__S119_T1	FALSE	S119	S001	FALSE	Post-travel	Post-travel	TRUE	Southeastern Asia	Southeastern Asia	TRUE
S061_T1	S001_T1	0.437345	S001_T1__S061_T1	FALSE	S061	S001	FALSE	Post-travel	Post-travel	TRUE	Southeastern Asia	Southeastern Asia	TRUE
S019_T1	S001_T1	0.935947	S001_T1__S019_T1	FALSE	S019	S001	FALSE	Post-travel	Post-travel	TRUE	Northern Africa	Southeastern Asia	FALSE
S090_T1	S001_T1	0.544302	S001_T1__S090_T1	FALSE	S090	S001	FALSE	Post-travel	Post-travel	TRUE	Eastern Africa	Southeastern Asia	FALSE
S116_T1	S001_T1	0.339312	S001_T1__S116_T1	FALSE	S116	S001	FALSE	Post-travel	Post-travel	TRUE	Southeastern Asia	Southeastern Asia	TRUE
S031_T0	S001_T1	0.459684	S001_T1__S031_T0	FALSE	S031	S001	FALSE	Pre-travel	Post-travel	FALSE	Southern Asia	Southeastern Asia	FALSE
S088_T1	S001_T1	0.478808	S001_T1__S088_T1	FALSE	S088	S001	FALSE	Post-travel	Post-travel	TRUE	Eastern Africa	Southeastern Asia	FALSE
S140_T0	S001_T1	0.869853	S001_T1__S140_T0	FALSE	S140	S001	FALSE	Pre-travel	Post-travel	FALSE	Southeastern Asia	Southeastern Asia	TRUE
S050_T0	S001_T1	0.932141	S001_T1__S050_T0	FALSE	S050	S001	FALSE	Pre-travel	Post-travel	FALSE	Southern Asia	Southeastern Asia	FALSE
S022_T0	S001_T1	0.472808	S001_T1__S022_T0	FALSE	S022	S001	FALSE	Pre-travel	Post-travel	FALSE	Northern Africa	Southeastern Asia	FALSE
S046_T0	S001_T1	0.879461	S001_T1__S046_T0	FALSE	S046	S001	FALSE	Pre-travel	Post-travel	FALSE	Southern Asia	Southeastern Asia	FALSE
S144_T0	S001_T1	0.486455	S001_T1__S144_T0	FALSE	S144	S001	FALSE	Pre-travel	Post-travel	FALSE	Eastern Africa	Southeastern Asia	FALSE
S018_T1	S001_T1	0.868408	S001_T1__S018_T1	FALSE	S018	S001	FALSE	Post-travel	Post-travel	TRUE	Eastern Africa	Southeastern Asia	FALSE
S045_T1	S001_T1	0.661719	S001_T1__S045_T1	FALSE	S045	S001	FALSE	Post-travel	Post-travel	TRUE	Southern Asia	Southeastern Asia	FALSE
S094_T1	S001_T1	0.731171	S001_T1__S094_T1	FALSE	S094	S001	FALSE	Post-travel	Post-travel	TRUE	Northern Africa	Southeastern Asia	FALSE
S179_T0	S001_T1	0.830109	S001_T1__S179_T0	FALSE	S179	S001	FALSE	Pre-travel	Post-travel	FALSE	Southeastern Asia	Southeastern Asia	TRUE
S040_T1	S001_T1	0.579563	S001_T1__S040_T1	FALSE	S040	S001	FALSE	Post-travel	Post-travel	TRUE	Northern Africa	Southeastern Asia	FALSE
S093_T1	S001_T1	0.654462	S001_T1__S093_T1	FALSE	S093	S001	FALSE	Post-travel	Post-travel	TRUE	Northern Africa	Southeastern Asia	FALSE
S159_T1	S002_T0	0.872698	S002_T0__S159_T1	FALSE	S159	S002	FALSE	Post-travel	Pre-travel	FALSE	Southern Asia	Southern Asia	TRUE
S005_T0	S002_T0	0.802037	S002_T0__S005_T0	FALSE	S005	S002	FALSE	Pre-travel	Pre-travel	TRUE	Southern Asia	Southern Asia	TRUE
S024_T1	S002_T0	0.820277	S002_T0__S024_T1	FALSE	S024	S002	FALSE	Post-travel	Pre-travel	FALSE	Southern Asia	Southern Asia	TRUE
S045_T1	S002_T0	0.780053	S002_T0__S045_T1	FALSE	S045	S002	FALSE	Post-travel	Pre-travel	FALSE	Southern Asia	Southern Asia	TRUE
S062_T1	S002_T0	0.854847	S002_T0__S062_T1	FALSE	S062	S002	FALSE	Post-travel	Pre-travel	FALSE	Eastern Africa	Southern Asia	FALSE
S025_T0	S002_T0	0.912742	S002_T0__S025_T0	FALSE	S025	S002	FALSE	Pre-travel	Pre-travel	TRUE	Southern Asia	Southern Asia	TRUE
S035_T0	S002_T0	0.668495	S002_T0__S035_T0	FALSE	S035	S002	FALSE	Pre-travel	Pre-travel	TRUE	Eastern Africa	Southern Asia	FALSE
S166_T0	S002_T0	0.633112	S002_T0__S166_T0	FALSE	S166	S002	FALSE	Pre-travel	Pre-travel	TRUE	Southern Asia	Southern Asia	TRUE
S177_T0	S002_T0	0.892163	S002_T0__S177_T0	FALSE	S177	S002	FALSE	Pre-travel	Pre-travel	TRUE	Southeastern Asia	Southern Asia	FALSE
S148_T1	S002_T0	0.92635	S002_T0__S148_T1	FALSE	S148	S002	FALSE	Post-travel	Pre-travel	FALSE	Northern Africa	Southern Asia	FALSE
S077_T0	S002_T0	0.415121	S002_T0__S077_T0	FALSE	S077	S002	FALSE	Pre-travel	Pre-travel	TRUE	Eastern Africa	Southern Asia	FALSE
S106_T1	S002_T0	0.775126	S002_T0__S106_T1	FALSE	S106	S002	FALSE	Post-travel	Pre-travel	FALSE	Southeastern Asia	Southern Asia	FALSE
S093_T0	S002_T0	0.848792	S002_T0__S093_T0	FALSE	S093	S002	FALSE	Pre-travel	Pre-travel	TRUE	Northern Africa	Southern Asia	FALSE
S113_T0	S002_T0	0.533656	S002_T0__S113_T0	FALSE	S113	S002	FALSE	Pre-travel	Pre-travel	TRUE	Eastern Africa	Southern Asia	FALSE
S121_T0	S002_T0	0.687948	S002_T0__S121_T0	FALSE	S121	S002	FALSE	Pre-travel	Pre-travel	TRUE	Eastern Africa	Southern Asia	FALSE
S055_T0	S002_T0	0.81277	S002_T0__S055_T0	FALSE	S055	S002	FALSE	Pre-travel	Pre-travel	TRUE	Eastern Africa	Southern Asia	FALSE
S011_T1	S002_T0	0.724124	S002_T0__S011_T1	FALSE	S011	S002	FALSE	Post-travel	Pre-travel	FALSE	Southeastern Asia	Southern Asia	FALSE
S157_T1	S002_T0	0.755487	S002_T0__S157_T1	FALSE	S157	S002	FALSE	Post-travel	Pre-travel	FALSE	Southeastern Asia	Southern Asia	FALSE
S048_T1	S002_T0	0.916872	S002_T0__S048_T1	FALSE	S048	S002	FALSE	Post-travel	Pre-travel	FALSE	Northern Africa	Southern Asia	FALSE
S153_T0	S002_T0	0.923723	S002_T0__S153_T0	FALSE	S153	S002	FALSE	Pre-travel	Pre-travel	TRUE	Eastern Africa	Southern Asia	FALSE
S178_T1	S002_T0	0.666877	S002_T0__S178_T1	FALSE	S178	S002	FALSE	Post-travel	Pre-travel	FALSE	Eastern Africa	Southern Asia	FALSE
S156_T0	S002_T0	0.934659	S002_T0__S156_T0	FALSE	S156	S002	FALSE	Pre-travel	Pre-travel	TRUE	Southeastern Asia	Southern Asia	FALSE
S029_T1	S002_T0	0.795809	S002_T0__S029_T1	FALSE	S029	S002	FALSE	Post-travel	Pre-travel	FALSE	Eastern Africa	Southern Asia	FALSE
S028_T1	S002_T0	0.847117	S002_T0__S028_T1	FALSE	S028	S002	FALSE	Post-travel	Pre-travel	FALSE	Southeastern Asia	Southern Asia	FALSE
S137_T1	S002_T0	0.899182	S002_T0__S137_T1	FALSE	S137	S002	FALSE	Post-travel	Pre-travel	FALSE	Southern Asia	Southern Asia	TRUE
S148_T0	S002_T0	0.939711	S002_T0__S148_T0	FALSE	S148	S002	FALSE	Pre-travel	Pre-travel	TRUE	Northern Africa	Southern Asia	FALSE
S010_T1	S002_T0	0.754702	S002_T0__S010_T1	FALSE	S010	S002	FALSE	Post-travel	Pre-travel	FALSE	Eastern Africa	Southern Asia	FALSE
S016_T0	S002_T0	0.470314	S002_T0__S016_T0	FALSE	S016	S002	FALSE	Pre-travel	Pre-travel	TRUE	Northern Africa	Southern Asia	FALSE
S081_T1	S002_T0	0.517525	S002_T0__S081_T1	FALSE	S081	S002	FALSE	Post-travel	Pre-travel	FALSE	Southeastern Asia	Southern Asia	FALSE
S083_T0	S002_T0	0.54898	S002_T0__S083_T0	FALSE	S083	S002	FALSE	Pre-travel	Pre-travel	TRUE	Northern Africa	Southern Asia	FALSE
S152_T0	S002_T0	0.703833	S002_T0__S152_T0	FALSE	S152	S002	FALSE	Pre-travel	Pre-travel	TRUE	Eastern Africa	Southern Asia	FALSE
S057_T0	S002_T0	0.606265	S002_T0__S057_T0	FALSE	S057	S002	FALSE	Pre-travel	Pre-travel	TRUE	Southern Asia	Southern Asia	TRUE
S158_T0	S002_T0	0.654608	S002_T0__S158_T0	FALSE	S158	S002	FALSE	Pre-travel	Pre-travel	TRUE	Southern Asia	Southern Asia	TRUE
S063_T1	S002_T0	0.773584	S002_T0__S063_T1	FALSE	S063	S002	FALSE	Post-travel	Pre-travel	FALSE	Southeastern Asia	Southern Asia	FALSE
S125_T0	S002_T0	0.891425	S002_T0__S125_T0	FALSE	S125	S002	FALSE	Pre-travel	Pre-travel	TRUE	Southern Asia	Southern Asia	TRUE
S147_T1	S002_T0	0.845253	S002_T0__S147_T1	FALSE	S147	S002	FALSE	Post-travel	Pre-travel	FALSE	Southern Asia	Southern Asia	TRUE
S057_T1	S002_T0	0.537394	S002_T0__S057_T1	FALSE	S057	S002	FALSE	Post-travel	Pre-travel	FALSE	Southern Asia	Southern Asia	TRUE
S021_T0	S002_T0	0.888623	S002_T0__S021_T0	FALSE	S021	S002	FALSE	Pre-travel	Pre-travel	TRUE	Northern Africa	Southern Asia	FALSE
S154_T0	S002_T0	0.601582	S002_T0__S154_T0	FALSE	S154	S002	FALSE	Pre-travel	Pre-travel	TRUE	Southern Asia	Southern Asia	TRUE
S072_T0	S002_T0	0.409934	S002_T0__S072_T0	FALSE	S072	S002	FALSE	Pre-travel	Pre-travel	TRUE	Eastern Africa	Southern Asia	FALSE
S128_T1	S002_T0	0.881723	S002_T0__S128_T1	FALSE	S128	S002	FALSE	Post-travel	Pre-travel	FALSE	Northern Africa	Southern Asia	FALSE
S068_T0	S002_T0	0.870511	S002_T0__S068_T0	FALSE	S068	S002	FALSE	Pre-travel	Pre-travel	TRUE	Eastern Africa	Southern Asia	FALSE
S060_T1	S002_T0	0.763653	S002_T0__S060_T1	FALSE	S060	S002	FALSE	Post-travel	Pre-travel	FALSE	Eastern Africa	Southern Asia	FALSE
S153_T1	S002_T0	0.872379	S002_T0__S153_T1	FALSE	S153	S002	FALSE	Post-travel	Pre-travel	FALSE	Eastern Africa	Southern Asia	FALSE
S048_T0	S002_T0	0.586894	S002_T0__S048_T0	FALSE	S048	S002	FALSE	Pre-travel	Pre-travel	TRUE	Northern Africa	Southern Asia	FALSE
S176_T0	S002_T0	0.859276	S002_T0__S176_T0	FALSE	S176	S002	FALSE	Pre-travel	Pre-travel	TRUE	Northern Africa	Southern Asia	FALSE
S106_T0	S002_T0	0.760422	S002_T0__S106_T0	FALSE	S106	S002	FALSE	Pre-travel	Pre-travel	TRUE	Southeastern Asia	Southern Asia	FALSE
S122_T0	S002_T0	0.898551	S002_T0__S122_T0	FALSE	S122	S002	FALSE	Pre-travel	Pre-travel	TRUE	Southeastern Asia	Southern Asia	FALSE
S182_T0	S002_T0	0.551674	S002_T0__S182_T0	FALSE	S182	S002	FALSE	Pre-travel	Pre-travel	TRUE	Northern Africa	Southern Asia	FALSE
S031_T0	S002_T0	0.904616	S002_T0__S031_T0	FALSE	S031	S002	FALSE	Pre-travel	Pre-travel	TRUE	Southern Asia	Southern Asia	TRUE
S129_T1	S002_T0	0.720393	S002_T0__S129_T1	FALSE	S129	S002	FALSE	Post-travel	Pre-travel	FALSE	Eastern Africa	Southern Asia	FALSE
S027_T1	S002_T0	0.689904	S002_T0__S027_T1	FALSE	S027	S002	FALSE	Post-travel	Pre-travel	FALSE	Eastern Africa	Southern Asia	FALSE
S010_T0	S002_T0	0.507349	S002_T0__S010_T0	FALSE	S010	S002	FALSE	Pre-travel	Pre-travel	TRUE	Eastern Africa	Southern Asia	FALSE
S050_T0	S002_T0	0.612386	S002_T0__S050_T0	FALSE	S050	S002	FALSE	Pre-travel	Pre-travel	TRUE	Southern Asia	Southern Asia	TRUE
S128_T0	S002_T0	0.912455	S002_T0__S128_T0	FALSE	S128	S002	FALSE	Pre-travel	Pre-travel	TRUE	Northern Africa	Southern Asia	FALSE
S073_T1	S002_T0	0.809855	S002_T0__S073_T1	FALSE	S073	S002	FALSE	Post-travel	Pre-travel	FALSE	Eastern Africa	Southern Asia	FALSE
S152_T1	S002_T0	0.879835	S002_T0__S152_T1	FALSE	S152	S002	FALSE	Post-travel	Pre-travel	FALSE	Eastern Africa	Southern Asia	FALSE
S133_T1	S002_T0	0.837406	S002_T0__S133_T1	FALSE	S133	S002	FALSE	Post-travel	Pre-travel	FALSE	Southeastern Asia	Southern Asia	FALSE
S082_T1	S002_T0	0.715248	S002_T0__S082_T1	FALSE	S082	S002	FALSE	Post-travel	Pre-travel	FALSE	Northern Africa	Southern Asia	FALSE
S089_T1	S002_T0	0.86307	S002_T0__S089_T1	FALSE	S089	S002	FALSE	Post-travel	Pre-travel	FALSE	Eastern Africa	Southern Asia	FALSE
S168_T1	S002_T0	0.680126	S002_T0__S168_T1	FALSE	S168	S002	FALSE	Post-travel	Pre-travel	FALSE	Southern Asia	Southern Asia	TRUE
S065_T0	S002_T0	0.74249	S002_T0__S065_T0	FALSE	S065	S002	FALSE	Pre-travel	Pre-travel	TRUE	Eastern Africa	Southern Asia	FALSE
S012_T0	S002_T0	0.932452	S002_T0__S012_T0	FALSE	S012	S002	FALSE	Pre-travel	Pre-travel	TRUE	Eastern Africa	Southern Asia	FALSE
S100_T1	S002_T0	0.943809	S002_T0__S100_T1	FALSE	S100	S002	FALSE	Post-travel	Pre-travel	FALSE	Southern Asia	Southern Asia	TRUE
S130_T0	S002_T0	0.880344	S002_T0__S130_T0	FALSE	S130	S002	FALSE	Pre-travel	Pre-travel	TRUE	Southeastern Asia	Southern Asia	FALSE
S175_T1	S002_T0	0.718295	S002_T0__S175_T1	FALSE	S175	S002	FALSE	Post-travel	Pre-travel	FALSE	Northern Africa	Southern Asia	FALSE
S014_T0	S002_T0	0.729998	S002_T0__S014_T0	FALSE	S014	S002	FALSE	Pre-travel	Pre-travel	TRUE	Northern Africa	Southern Asia	FALSE
S067_T0	S002_T0	0.420252	S002_T0__S067_T0	FALSE	S067	S002	FALSE	Pre-travel	Pre-travel	TRUE	Eastern Africa	Southern Asia	FALSE
S029_T0	S002_T0	0.905548	S002_T0__S029_T0	FALSE	S029	S002	FALSE	Pre-travel	Pre-travel	TRUE	Eastern Africa	Southern Asia	FALSE
S041_T0	S002_T0	0.825375	S002_T0__S041_T0	FALSE	S041	S002	FALSE	Pre-travel	Pre-travel	TRUE	Southern Asia	Southern Asia	TRUE
S184_T1	S002_T0	0.739546	S002_T0__S184_T1	FALSE	S184	S002	FALSE	Post-travel	Pre-travel	FALSE	Northern Africa	Southern Asia	FALSE
S047_T1	S002_T0	0.9061	S002_T0__S047_T1	FALSE	S047	S002	FALSE	Post-travel	Pre-travel	FALSE	Southern Asia	Southern Asia	TRUE
S039_T0	S002_T0	0.537459	S002_T0__S039_T0	FALSE	S039	S002	FALSE	Pre-travel	Pre-travel	TRUE	Northern Africa	Southern Asia	FALSE
S124_T0	S002_T0	0.847787	S002_T0__S124_T0	FALSE	S124	S002	FALSE	Pre-travel	Pre-travel	TRUE	Southeastern Asia	Southern Asia	FALSE
S080_T0	S002_T0	0.432834	S002_T0__S080_T0	FALSE	S080	S002	FALSE	Pre-travel	Pre-travel	TRUE	Southeastern Asia	Southern Asia	FALSE
S190_T0	S002_T0	0.75365	S002_T0__S190_T0	FALSE	S190	S002	FALSE	Pre-travel	Pre-travel	TRUE	Eastern Africa	Southern Asia	FALSE
S040_T0	S002_T0	0.744206	S002_T0__S040_T0	FALSE	S040	S002	FALSE	Pre-travel	Pre-travel	TRUE	Northern Africa	Southern Asia	FALSE
S135_T1	S002_T0	0.658615	S002_T0__S135_T1	FALSE	S135	S002	FALSE	Post-travel	Pre-travel	FALSE	Southern Asia	Southern Asia	TRUE
S040_T1	S002_T0	0.882732	S002_T0__S040_T1	FALSE	S040	S002	FALSE	Post-travel	Pre-travel	FALSE	Northern Africa	Southern Asia	FALSE
S170_T0	S002_T0	0.66087	S002_T0__S170_T0	FALSE	S170	S002	FALSE	Pre-travel	Pre-travel	TRUE	Southeastern Asia	Southern Asia	FALSE
S131_T0	S002_T0	0.738953	S002_T0__S131_T0	FALSE	S131	S002	FALSE	Pre-travel	Pre-travel	TRUE	Northern Africa	Southern Asia	FALSE
S184_T0	S002_T0	0.500248	S002_T0__S184_T0	FALSE	S184	S002	FALSE	Pre-travel	Pre-travel	TRUE	Northern Africa	Southern Asia	FALSE
S064_T0	S002_T0	0.9634	S002_T0__S064_T0	FALSE	S064	S002	FALSE	Pre-travel	Pre-travel	TRUE	Southeastern Asia	Southern Asia	FALSE
S126_T1	S002_T0	0.666635	S002_T0__S126_T1	FALSE	S126	S002	FALSE	Post-travel	Pre-travel	FALSE	Southeastern Asia	Southern Asia	FALSE
S183_T1	S002_T0	0.933914	S002_T0__S183_T1	FALSE	S183	S002	FALSE	Post-travel	Pre-travel	FALSE	Southern Asia	Southern Asia	TRUE
S034_T1	S002_T0	0.521239	S002_T0__S034_T1	FALSE	S034	S002	FALSE	Post-travel	Pre-travel	FALSE	Southern Asia	Southern Asia	TRUE
S042_T1	S002_T0	0.945327	S002_T0__S042_T1	FALSE	S042	S002	FALSE	Post-travel	Pre-travel	FALSE	Eastern Africa	Southern Asia	FALSE
S069_T1	S002_T0	0.560264	S002_T0__S069_T1	FALSE	S069	S002	FALSE	Post-travel	Pre-travel	FALSE	Southern Asia	Southern Asia	TRUE
S143_T1	S002_T0	0.903322	S002_T0__S143_T1	FALSE	S143	S002	FALSE	Post-travel	Pre-travel	FALSE	Eastern Africa	Southern Asia	FALSE
S116_T1	S002_T0	0.896082	S002_T0__S116_T1	FALSE	S116	S002	FALSE	Post-travel	Pre-travel	FALSE	Southeastern Asia	Southern Asia	FALSE
S043_T1	S002_T0	0.757827	S002_T0__S043_T1	FALSE	S043	S002	FALSE	Post-travel	Pre-travel	FALSE	Southeastern Asia	Southern Asia	FALSE
S095_T0	S002_T0	0.630119	S002_T0__S095_T0	FALSE	S095	S002	FALSE	Pre-travel	Pre-travel	TRUE	Northern Africa	Southern Asia	FALSE
S086_T0	S002_T0	0.562946	S002_T0__S086_T0	FALSE	S086	S002	FALSE	Pre-travel	Pre-travel	TRUE	Northern Africa	Southern Asia	FALSE
S053_T0	S002_T0	0.943391	S002_T0__S053_T0	FALSE	S053	S002	FALSE	Pre-travel	Pre-travel	TRUE	Northern Africa	Southern Asia	FALSE
S051_T0	S002_T0	0.632097	S002_T0__S051_T0	FALSE	S051	S002	FALSE	Pre-travel	Pre-travel	TRUE	Southern Asia	Southern Asia	TRUE
S126_T0	S002_T0	0.627782	S002_T0__S126_T0	FALSE	S126	S002	FALSE	Pre-travel	Pre-travel	TRUE	Southeastern Asia	Southern Asia	FALSE
S005_T1	S002_T0	0.743702	S002_T0__S005_T1	FALSE	S005	S002	FALSE	Post-travel	Pre-travel	FALSE	Southern Asia	Southern Asia	TRUE
S038_T0	S002_T0	0.602502	S002_T0__S038_T0	FALSE	S038	S002	FALSE	Pre-travel	Pre-travel	TRUE	Southeastern Asia	Southern Asia	FALSE
S181_T0	S002_T0	0.763923	S002_T0__S181_T0	FALSE	S181	S002	FALSE	Pre-travel	Pre-travel	TRUE	Southern Asia	Southern Asia	TRUE
S174_T1	S002_T0	0.818245	S002_T0__S174_T1	FALSE	S174	S002	FALSE	Post-travel	Pre-travel	FALSE	Southeastern Asia	Southern Asia	FALSE
S047_T0	S002_T0	0.507091	S002_T0__S047_T0	FALSE	S047	S002	FALSE	Pre-travel	Pre-travel	TRUE	Southern Asia	Southern Asia	TRUE
S006_T0	S002_T0	0.628698	S002_T0__S006_T0	FALSE	S006	S002	FALSE	Pre-travel	Pre-travel	TRUE	Southern Asia	Southern Asia	TRUE
S102_T1	S002_T0	0.752194	S002_T0__S102_T1	FALSE	S102	S002	FALSE	Post-travel	Pre-travel	FALSE	Southeastern Asia	Southern Asia	FALSE
S116_T0	S002_T0	0.56143	S002_T0__S116_T0	FALSE	S116	S002	FALSE	Pre-travel	Pre-travel	TRUE	Southeastern Asia	Southern Asia	FALSE
S190_T1	S002_T0	0.945006	S002_T0__S190_T1	FALSE	S190	S002	FALSE	Post-travel	Pre-travel	FALSE	Eastern Africa	Southern Asia	FALSE
S098_T0	S002_T0	0.749678	S002_T0__S098_T0	FALSE	S098	S002	FALSE	Pre-travel	Pre-travel	TRUE	Eastern Africa	Southern Asia	FALSE
S090_T1	S002_T0	0.893656	S002_T0__S090_T1	FALSE	S090	S002	FALSE	Post-travel	Pre-travel	FALSE	Eastern Africa	Southern Asia	FALSE
S025_T1	S002_T0	0.865449	S002_T0__S025_T1	FALSE	S025	S002	FALSE	Post-travel	Pre-travel	FALSE	Southern Asia	Southern Asia	TRUE
S174_T0	S002_T0	0.778614	S002_T0__S174_T0	FALSE	S174	S002	FALSE	Pre-travel	Pre-travel	TRUE	Southeastern Asia	Southern Asia	FALSE
S049_T1	S002_T0	0.760429	S002_T0__S049_T1	FALSE	S049	S002	FALSE	Post-travel	Pre-travel	FALSE	Northern Africa	Southern Asia	FALSE
S019_T1	S002_T0	0.544627	S002_T0__S019_T1	FALSE	S019	S002	FALSE	Post-travel	Pre-travel	FALSE	Northern Africa	Southern Asia	FALSE
S082_T0	S002_T0	0.680905	S002_T0__S082_T0	FALSE	S082	S002	FALSE	Pre-travel	Pre-travel	TRUE	Northern Africa	Southern Asia	FALSE
S009_T0	S002_T0	0.517019	S002_T0__S009_T0	FALSE	S009	S002	FALSE	Pre-travel	Pre-travel	TRUE	Northern Africa	Southern Asia	FALSE
S139_T1	S002_T0	0.899566	S002_T0__S139_T1	FALSE	S139	S002	FALSE	Post-travel	Pre-travel	FALSE	Southeastern Asia	Southern Asia	FALSE
S124_T1	S002_T0	0.695444	S002_T0__S124_T1	FALSE	S124	S002	FALSE	Post-travel	Pre-travel	FALSE	Southeastern Asia	Southern Asia	FALSE
S101_T1	S002_T0	0.81634	S002_T0__S101_T1	FALSE	S101	S002	FALSE	Post-travel	Pre-travel	FALSE	Southeastern Asia	Southern Asia	FALSE
S074_T1	S002_T0	0.56665	S002_T0__S074_T1	FALSE	S074	S002	FALSE	Post-travel	Pre-travel	FALSE	Northern Africa	Southern Asia	FALSE
S108_T0	S002_T0	0.815335	S002_T0__S108_T0	FALSE	S108	S002	FALSE	Pre-travel	Pre-travel	TRUE	Southern Asia	Southern Asia	TRUE
S186_T0	S002_T0	0.744609	S002_T0__S186_T0	FALSE	S186	S002	FALSE	Pre-travel	Pre-travel	TRUE	Southern Asia	Southern Asia	TRUE
S136_T0	S002_T0	0.802907	S002_T0__S136_T0	FALSE	S136	S002	FALSE	Pre-travel	Pre-travel	TRUE	Southern Asia	Southern Asia	TRUE
S186_T1	S002_T0	0.783302	S002_T0__S186_T1	FALSE	S186	S002	FALSE	Post-travel	Pre-travel	FALSE	Southern Asia	Southern Asia	TRUE
S163_T0	S002_T0	0.679651	S002_T0__S163_T0	FALSE	S163	S002	FALSE	Pre-travel	Pre-travel	TRUE	Northern Africa	Southern Asia	FALSE
S145_T1	S002_T0	0.818781	S002_T0__S145_T1	FALSE	S145	S002	FALSE	Post-travel	Pre-travel	FALSE	Northern Africa	Southern Asia	FALSE
S167_T1	S002_T0	0.609761	S002_T0__S167_T1	FALSE	S167	S002	FALSE	Post-travel	Pre-travel	FALSE	Eastern Africa	Southern Asia	FALSE
S016_T1	S002_T0	0.729713	S002_T0__S016_T1	FALSE	S016	S002	FALSE	Post-travel	Pre-travel	FALSE	Northern Africa	Southern Asia	FALSE
S139_T0	S002_T0	0.442639	S002_T0__S139_T0	FALSE	S139	S002	FALSE	Pre-travel	Pre-travel	TRUE	Southeastern Asia	Southern Asia	FALSE
S074_T0	S002_T0	0.728277	S002_T0__S074_T0	FALSE	S074	S002	FALSE	Pre-travel	Pre-travel	TRUE	Northern Africa	Southern Asia	FALSE
S179_T0	S002_T0	0.57569	S002_T0__S179_T0	FALSE	S179	S002	FALSE	Pre-travel	Pre-travel	TRUE	Southeastern Asia	Southern Asia	FALSE
S009_T1	S002_T0	0.523788	S002_T0__S009_T1	FALSE	S009	S002	FALSE	Post-travel	Pre-travel	FALSE	Northern Africa	Southern Asia	FALSE
S044_T0	S002_T0	0.901822	S002_T0__S044_T0	FALSE	S044	S002	FALSE	Pre-travel	Pre-travel	TRUE	Southeastern Asia	Southern Asia	FALSE
S107_T1	S002_T0	0.558635	S002_T0__S107_T1	FALSE	S107	S002	FALSE	Post-travel	Pre-travel	FALSE	Southern Asia	Southern Asia	TRUE
S042_T0	S002_T0	0.809435	S002_T0__S042_T0	FALSE	S042	S002	FALSE	Pre-travel	Pre-travel	TRUE	Eastern Africa	Southern Asia	FALSE
S036_T0	S002_T0	0.940049	S002_T0__S036_T0	FALSE	S036	S002	FALSE	Pre-travel	Pre-travel	TRUE	Southeastern Asia	Southern Asia	FALSE
S050_T1	S002_T0	0.718911	S002_T0__S050_T1	FALSE	S050	S002	FALSE	Post-travel	Pre-travel	FALSE	Southern Asia	Southern Asia	TRUE
S037_T1	S002_T0	0.398483	S002_T0__S037_T1	FALSE	S037	S002	FALSE	Post-travel	Pre-travel	FALSE	Southeastern Asia	Southern Asia	FALSE
S183_T0	S002_T0	0.814697	S002_T0__S183_T0	FALSE	S183	S002	FALSE	Pre-travel	Pre-travel	TRUE	Southern Asia	Southern Asia	TRUE
S067_T1	S002_T0	0.692525	S002_T0__S067_T1	FALSE	S067	S002	FALSE	Post-travel	Pre-travel	FALSE	Eastern Africa	Southern Asia	FALSE
S022_T1	S002_T0	0.942026	S002_T0__S022_T1	FALSE	S022	S002	FALSE	Post-travel	Pre-travel	FALSE	Northern Africa	Southern Asia	FALSE
S012_T1	S002_T0	0.926381	S002_T0__S012_T1	FALSE	S012	S002	FALSE	Post-travel	Pre-travel	FALSE	Eastern Africa	Southern Asia	FALSE
S105_T1	S002_T0	0.768072	S002_T0__S105_T1	FALSE	S105	S002	FALSE	Post-travel	Pre-travel	FALSE	Eastern Africa	Southern Asia	FALSE
S167_T0	S002_T0	0.626741	S002_T0__S167_T0	FALSE	S167	S002	FALSE	Pre-travel	Pre-travel	TRUE	Eastern Africa	Southern Asia	FALSE
S111_T1	S002_T0	0.693007	S002_T0__S111_T1	FALSE	S111	S002	FALSE	Post-travel	Pre-travel	FALSE	Northern Africa	Southern Asia	FALSE
S160_T0	S002_T0	0.836082	S002_T0__S160_T0	FALSE	S160	S002	FALSE	Pre-travel	Pre-travel	TRUE	Southeastern Asia	Southern Asia	FALSE
S144_T1	S002_T0	0.831474	S002_T0__S144_T1	FALSE	S144	S002	FALSE	Post-travel	Pre-travel	FALSE	Eastern Africa	Southern Asia	FALSE
S061_T1	S002_T0	0.975741	S002_T0__S061_T1	FALSE	S061	S002	FALSE	Post-travel	Pre-travel	FALSE	Southeastern Asia	Southern Asia	FALSE
S136_T1	S002_T0	0.661444	S002_T0__S136_T1	FALSE	S136	S002	FALSE	Post-travel	Pre-travel	FALSE	Southern Asia	Southern Asia	TRUE
S120_T1	S002_T0	0.835234	S002_T0__S120_T1	FALSE	S120	S002	FALSE	Post-travel	Pre-travel	FALSE	Southern Asia	Southern Asia	TRUE
S015_T0	S002_T0	0.545068	S002_T0__S015_T0	FALSE	S015	S002	FALSE	Pre-travel	Pre-travel	TRUE	Southern Asia	Southern Asia	TRUE
S135_T0	S002_T0	0.692063	S002_T0__S135_T0	FALSE	S135	S002	FALSE	Pre-travel	Pre-travel	TRUE	Southern Asia	Southern Asia	TRUE
S015_T1	S002_T0	0.89356	S002_T0__S015_T1	FALSE	S015	S002	FALSE	Post-travel	Pre-travel	FALSE	Southern Asia	Southern Asia	TRUE
S171_T1	S002_T0	0.893919	S002_T0__S171_T1	FALSE	S171	S002	FALSE	Post-travel	Pre-travel	FALSE	Southeastern Asia	Southern Asia	FALSE
S055_T1	S002_T0	0.746513	S002_T0__S055_T1	FALSE	S055	S002	FALSE	Post-travel	Pre-travel	FALSE	Eastern Africa	Southern Asia	FALSE
S140_T1	S002_T0	0.913001	S002_T0__S140_T1	FALSE	S140	S002	FALSE	Post-travel	Pre-travel	FALSE	Southeastern Asia	Southern Asia	FALSE
S185_T0	S002_T0	0.600242	S002_T0__S185_T0	FALSE	S185	S002	FALSE	Pre-travel	Pre-travel	TRUE	Southeastern Asia	Southern Asia	FALSE
S090_T0	S002_T0	0.932105	S002_T0__S090_T0	FALSE	S090	S002	FALSE	Pre-travel	Pre-travel	TRUE	Eastern Africa	Southern Asia	FALSE
S132_T0	S002_T0	0.536564	S002_T0__S132_T0	FALSE	S132	S002	FALSE	Pre-travel	Pre-travel	TRUE	Northern Africa	Southern Asia	FALSE
S019_T0	S002_T0	0.596216	S002_T0__S019_T0	FALSE	S019	S002	FALSE	Pre-travel	Pre-travel	TRUE	Northern Africa	Southern Asia	FALSE
S165_T1	S002_T0	0.740651	S002_T0__S165_T1	FALSE	S165	S002	FALSE	Post-travel	Pre-travel	FALSE	Southern Asia	Southern Asia	TRUE
S065_T1	S002_T0	0.917363	S002_T0__S065_T1	FALSE	S065	S002	FALSE	Post-travel	Pre-travel	FALSE	Eastern Africa	Southern Asia	FALSE
S110_T0	S002_T0	0.908042	S002_T0__S110_T0	FALSE	S110	S002	FALSE	Pre-travel	Pre-travel	TRUE	Southeastern Asia	Southern Asia	FALSE
S099_T0	S002_T0	0.928776	S002_T0__S099_T0	FALSE	S099	S002	FALSE	Pre-travel	Pre-travel	TRUE	Southern Asia	Southern Asia	TRUE
S087_T0	S002_T0	0.863907	S002_T0__S087_T0	FALSE	S087	S002	FALSE	Pre-travel	Pre-travel	TRUE	Eastern Africa	Southern Asia	FALSE
S189_T0	S002_T0	0.54202	S002_T0__S189_T0	FALSE	S189	S002	FALSE	Pre-travel	Pre-travel	TRUE	Northern Africa	Southern Asia	FALSE
S088_T0	S002_T0	0.966872	S002_T0__S088_T0	FALSE	S088	S002	FALSE	Pre-travel	Pre-travel	TRUE	Eastern Africa	Southern Asia	FALSE
S175_T0	S002_T0	0.56493	S002_T0__S175_T0	FALSE	S175	S002	FALSE	Pre-travel	Pre-travel	TRUE	Northern Africa	Southern Asia	FALSE
S054_T1	S002_T0	0.786359	S002_T0__S054_T1	FALSE	S054	S002	FALSE	Post-travel	Pre-travel	FALSE	Northern Africa	Southern Asia	FALSE
S187_T0	S002_T0	0.893033	S002_T0__S187_T0	FALSE	S187	S002	FALSE	Pre-travel	Pre-travel	TRUE	Eastern Africa	Southern Asia	FALSE
S092_T1	S002_T0	0.908972	S002_T0__S092_T1	FALSE	S092	S002	FALSE	Post-travel	Pre-travel	FALSE	Northern Africa	Southern Asia	FALSE
S160_T1	S002_T0	0.849631	S002_T0__S160_T1	FALSE	S160	S002	FALSE	Post-travel	Pre-travel	FALSE	Southeastern Asia	Southern Asia	FALSE
S150_T1	S002_T0	0.910505	S002_T0__S150_T1	FALSE	S150	S002	FALSE	Post-travel	Pre-travel	FALSE	Northern Africa	Southern Asia	FALSE
S094_T0	S002_T0	0.675698	S002_T0__S094_T0	FALSE	S094	S002	FALSE	Pre-travel	Pre-travel	TRUE	Northern Africa	Southern Asia	FALSE
S119_T1	S002_T0	0.887069	S002_T0__S119_T1	FALSE	S119	S002	FALSE	Post-travel	Pre-travel	FALSE	Southeastern Asia	Southern Asia	FALSE
S021_T1	S002_T0	0.841341	S002_T0__S021_T1	FALSE	S021	S002	FALSE	Post-travel	Pre-travel	FALSE	Northern Africa	Southern Asia	FALSE
S146_T0	S002_T0	0.798162	S002_T0__S146_T0	FALSE	S146	S002	FALSE	Pre-travel	Pre-travel	TRUE	Northern Africa	Southern Asia	FALSE
S007_T0	S002_T0	0.40426	S002_T0__S007_T0	FALSE	S007	S002	FALSE	Pre-travel	Pre-travel	TRUE	Southern Asia	Southern Asia	TRUE
S030_T1	S002_T0	0.916495	S002_T0__S030_T1	FALSE	S030	S002	FALSE	Post-travel	Pre-travel	FALSE	Southeastern Asia	Southern Asia	FALSE
S020_T0	S002_T0	0.758052	S002_T0__S020_T0	FALSE	S020	S002	FALSE	Pre-travel	Pre-travel	TRUE	Southeastern Asia	Southern Asia	FALSE
S031_T1	S002_T0	0.786945	S002_T0__S031_T1	FALSE	S031	S002	FALSE	Post-travel	Pre-travel	FALSE	Southern Asia	Southern Asia	TRUE
S060_T0	S002_T0	0.555471	S002_T0__S060_T0	FALSE	S060	S002	FALSE	Pre-travel	Pre-travel	TRUE	Eastern Africa	Southern Asia	FALSE
S018_T0	S002_T0	0.426205	S002_T0__S018_T0	FALSE	S018	S002	FALSE	Pre-travel	Pre-travel	TRUE	Eastern Africa	Southern Asia	FALSE
S179_T1	S002_T0	0.889094	S002_T0__S179_T1	FALSE	S179	S002	FALSE	Post-travel	Pre-travel	FALSE	Southeastern Asia	Southern Asia	FALSE
S007_T1	S002_T0	0.691895	S002_T0__S007_T1	FALSE	S007	S002	FALSE	Post-travel	Pre-travel	FALSE	Southern Asia	Southern Asia	TRUE
S073_T0	S002_T0	0.539112	S002_T0__S073_T0	FALSE	S073	S002	FALSE	Pre-travel	Pre-travel	TRUE	Eastern Africa	Southern Asia	FALSE
S017_T1	S002_T0	0.939733	S002_T0__S017_T1	FALSE	S017	S002	FALSE	Post-travel	Pre-travel	FALSE	Southern Asia	Southern Asia	TRUE
S143_T0	S002_T0	0.934298	S002_T0__S143_T0	FALSE	S143	S002	FALSE	Pre-travel	Pre-travel	TRUE	Eastern Africa	Southern Asia	FALSE
S022_T0	S002_T0	0.930417	S002_T0__S022_T0	FALSE	S022	S002	FALSE	Pre-travel	Pre-travel	TRUE	Northern Africa	Southern Asia	FALSE
S105_T0	S002_T0	0.798282	S002_T0__S105_T0	FALSE	S105	S002	FALSE	Pre-travel	Pre-travel	TRUE	Eastern Africa	Southern Asia	FALSE
S051_T1	S002_T0	0.509056	S002_T0__S051_T1	FALSE	S051	S002	FALSE	Post-travel	Pre-travel	FALSE	Southern Asia	Southern Asia	TRUE
S120_T0	S002_T0	0.863372	S002_T0__S120_T0	FALSE	S120	S002	FALSE	Pre-travel	Pre-travel	TRUE	Southern Asia	Southern Asia	TRUE
S189_T1	S002_T0	0.485421	S002_T0__S189_T1	FALSE	S189	S002	FALSE	Post-travel	Pre-travel	FALSE	Northern Africa	Southern Asia	FALSE
S024_T0	S002_T0	0.577397	S002_T0__S024_T0	FALSE	S024	S002	FALSE	Pre-travel	Pre-travel	TRUE	Southern Asia	Southern Asia	TRUE
S032_T0	S002_T0	0.867827	S002_T0__S032_T0	FALSE	S032	S002	FALSE	Pre-travel	Pre-travel	TRUE	Southeastern Asia	Southern Asia	FALSE
S075_T0	S002_T0	0.912257	S002_T0__S075_T0	FALSE	S075	S002	FALSE	Pre-travel	Pre-travel	TRUE	Northern Africa	Southern Asia	FALSE
S097_T1	S002_T0	0.820304	S002_T0__S097_T1	FALSE	S097	S002	FALSE	Post-travel	Pre-travel	FALSE	Eastern Africa	Southern Asia	FALSE
S117_T1	S002_T0	0.756413	S002_T0__S117_T1	FALSE	S117	S002	FALSE	Post-travel	Pre-travel	FALSE	Southeastern Asia	Southern Asia	FALSE
S107_T0	S002_T0	0.558467	S002_T0__S107_T0	FALSE	S107	S002	FALSE	Pre-travel	Pre-travel	TRUE	Southern Asia	Southern Asia	TRUE
S098_T1	S002_T0	0.962367	S002_T0__S098_T1	FALSE	S098	S002	FALSE	Post-travel	Pre-travel	FALSE	Eastern Africa	Southern Asia	FALSE
S142_T1	S002_T0	0.850713	S002_T0__S142_T1	FALSE	S142	S002	FALSE	Post-travel	Pre-travel	FALSE	Eastern Africa	Southern Asia	FALSE
S041_T1	S002_T0	0.910238	S002_T0__S041_T1	FALSE	S041	S002	FALSE	Post-travel	Pre-travel	FALSE	Southern Asia	Southern Asia	TRUE
S102_T0	S002_T0	0.832246	S002_T0__S102_T0	FALSE	S102	S002	FALSE	Pre-travel	Pre-travel	TRUE	Southeastern Asia	Southern Asia	FALSE
S161_T0	S002_T0	0.78467	S002_T0__S161_T0	FALSE	S161	S002	FALSE	Pre-travel	Pre-travel	TRUE	Northern Africa	Southern Asia	FALSE
S161_T1	S002_T0	0.797658	S002_T0__S161_T1	FALSE	S161	S002	FALSE	Post-travel	Pre-travel	FALSE	Northern Africa	Southern Asia	FALSE
S114_T1	S002_T0	0.926336	S002_T0__S114_T1	FALSE	S114	S002	FALSE	Post-travel	Pre-travel	FALSE	Eastern Africa	Southern Asia	FALSE
S085_T0	S002_T0	0.446786	S002_T0__S085_T0	FALSE	S085	S002	FALSE	Pre-travel	Pre-travel	TRUE	Southern Asia	Southern Asia	TRUE
S123_T0	S002_T0	0.663143	S002_T0__S123_T0	FALSE	S123	S002	FALSE	Pre-travel	Pre-travel	TRUE	Eastern Africa	Southern Asia	FALSE
S168_T0	S002_T0	0.852336	S002_T0__S168_T0	FALSE	S168	S002	FALSE	Pre-travel	Pre-travel	TRUE	Southern Asia	Southern Asia	TRUE
S066_T0	S002_T0	0.657121	S002_T0__S066_T0	FALSE	S066	S002	FALSE	Pre-travel	Pre-travel	TRUE	Eastern Africa	Southern Asia	FALSE
S103_T1	S002_T0	0.973314	S002_T0__S103_T1	FALSE	S103	S002	FALSE	Post-travel	Pre-travel	FALSE	Northern Africa	Southern Asia	FALSE
S138_T1	S002_T0	0.84217	S002_T0__S138_T1	FALSE	S138	S002	FALSE	Post-travel	Pre-travel	FALSE	Southern Asia	Southern Asia	TRUE
S033_T1	S002_T0	0.737676	S002_T0__S033_T1	FALSE	S033	S002	FALSE	Post-travel	Pre-travel	FALSE	Southern Asia	Southern Asia	TRUE
S052_T1	S002_T0	0.776915	S002_T0__S052_T1	FALSE	S052	S002	FALSE	Post-travel	Pre-travel	FALSE	Southeastern Asia	Southern Asia	FALSE
S037_T0	S002_T0	0.61331	S002_T0__S037_T0	FALSE	S037	S002	FALSE	Pre-travel	Pre-travel	TRUE	Southeastern Asia	Southern Asia	FALSE
S045_T0	S002_T0	0.543124	S002_T0__S045_T0	FALSE	S045	S002	FALSE	Pre-travel	Pre-travel	TRUE	Southern Asia	Southern Asia	TRUE
S142_T0	S002_T0	0.79837	S002_T0__S142_T0	FALSE	S142	S002	FALSE	Pre-travel	Pre-travel	TRUE	Eastern Africa	Southern Asia	FALSE
S170_T1	S002_T0	0.941363	S002_T0__S170_T1	FALSE	S170	S002	FALSE	Post-travel	Pre-travel	FALSE	Southeastern Asia	Southern Asia	FALSE
S018_T1	S002_T0	0.510675	S002_T0__S018_T1	FALSE	S018	S002	FALSE	Post-travel	Pre-travel	FALSE	Eastern Africa	Southern Asia	FALSE
S149_T0	S002_T0	0.904761	S002_T0__S149_T0	FALSE	S149	S002	FALSE	Pre-travel	Pre-travel	TRUE	Eastern Africa	Southern Asia	FALSE
S109_T1	S002_T0	0.773015	S002_T0__S109_T1	FALSE	S109	S002	FALSE	Post-travel	Pre-travel	FALSE	Southern Asia	Southern Asia	TRUE
S069_T0	S002_T0	0.564824	S002_T0__S069_T0	FALSE	S069	S002	FALSE	Pre-travel	Pre-travel	TRUE	Southern Asia	Southern Asia	TRUE
S131_T1	S002_T0	0.923624	S002_T0__S131_T1	FALSE	S131	S002	FALSE	Post-travel	Pre-travel	FALSE	Northern Africa	Southern Asia	FALSE
S013_T1	S002_T0	0.625358	S002_T0__S013_T1	FALSE	S013	S002	FALSE	Post-travel	Pre-travel	FALSE	Eastern Africa	Southern Asia	FALSE
S079_T0	S002_T0	0.773903	S002_T0__S079_T0	FALSE	S079	S002	FALSE	Pre-travel	Pre-travel	TRUE	Southern Asia	Southern Asia	TRUE
S104_T0	S002_T0	0.644845	S002_T0__S104_T0	FALSE	S104	S002	FALSE	Pre-travel	Pre-travel	TRUE	Northern Africa	Southern Asia	FALSE
S003_T0	S002_T0	0.460734	S002_T0__S003_T0	FALSE	S003	S002	FALSE	Pre-travel	Pre-travel	TRUE	Southeastern Asia	Southern Asia	FALSE
S159_T0	S002_T0	0.787157	S002_T0__S159_T0	FALSE	S159	S002	FALSE	Pre-travel	Pre-travel	TRUE	Southern Asia	Southern Asia	TRUE
S035_T1	S002_T0	0.579591	S002_T0__S035_T1	FALSE	S035	S002	FALSE	Post-travel	Pre-travel	FALSE	Eastern Africa	Southern Asia	FALSE
S091_T0	S002_T0	0.809224	S002_T0__S091_T0	FALSE	S091	S002	FALSE	Pre-travel	Pre-travel	TRUE	Eastern Africa	Southern Asia	FALSE
S122_T1	S002_T0	0.853873	S002_T0__S122_T1	FALSE	S122	S002	FALSE	Post-travel	Pre-travel	FALSE	Southeastern Asia	Southern Asia	FALSE
S108_T1	S002_T0	0.89152	S002_T0__S108_T1	FALSE	S108	S002	FALSE	Post-travel	Pre-travel	FALSE	Southern Asia	Southern Asia	TRUE
S115_T1	S002_T0	0.483992	S002_T0__S115_T1	FALSE	S115	S002	FALSE	Post-travel	Pre-travel	FALSE	Southeastern Asia	Southern Asia	FALSE
S088_T1	S002_T0	0.981832	S002_T0__S088_T1	FALSE	S088	S002	FALSE	Post-travel	Pre-travel	FALSE	Eastern Africa	Southern Asia	FALSE
S030_T0	S002_T0	0.922905	S002_T0__S030_T0	FALSE	S030	S002	FALSE	Pre-travel	Pre-travel	TRUE	Southeastern Asia	Southern Asia	FALSE
S149_T1	S002_T0	0.898856	S002_T0__S149_T1	FALSE	S149	S002	FALSE	Post-travel	Pre-travel	FALSE	Eastern Africa	Southern Asia	FALSE
S182_T1	S002_T0	0.875521	S002_T0__S182_T1	FALSE	S182	S002	FALSE	Post-travel	Pre-travel	FALSE	Northern Africa	Southern Asia	FALSE
S097_T0	S002_T0	0.5705	S002_T0__S097_T0	FALSE	S097	S002	FALSE	Pre-travel	Pre-travel	TRUE	Eastern Africa	Southern Asia	FALSE
S027_T0	S002_T0	0.558454	S002_T0__S027_T0	FALSE	S027	S002	FALSE	Pre-travel	Pre-travel	TRUE	Eastern Africa	Southern Asia	FALSE
S076_T0	S002_T0	0.539227	S002_T0__S076_T0	FALSE	S076	S002	FALSE	Pre-travel	Pre-travel	TRUE	Southeastern Asia	Southern Asia	FALSE
S156_T1	S002_T0	0.900784	S002_T0__S156_T1	FALSE	S156	S002	FALSE	Post-travel	Pre-travel	FALSE	Southeastern Asia	Southern Asia	FALSE
S169_T1	S002_T0	0.798557	S002_T0__S169_T1	FALSE	S169	S002	FALSE	Post-travel	Pre-travel	FALSE	Southern Asia	Southern Asia	TRUE
S094_T1	S002_T0	0.70916	S002_T0__S094_T1	FALSE	S094	S002	FALSE	Post-travel	Pre-travel	FALSE	Northern Africa	Southern Asia	FALSE
S147_T0	S002_T0	0.667125	S002_T0__S147_T0	FALSE	S147	S002	FALSE	Pre-travel	Pre-travel	TRUE	Southern Asia	Southern Asia	TRUE
S129_T0	S002_T0	0.797904	S002_T0__S129_T0	FALSE	S129	S002	FALSE	Pre-travel	Pre-travel	TRUE	Eastern Africa	Southern Asia	FALSE
S017_T0	S002_T0	0.842252	S002_T0__S017_T0	FALSE	S017	S002	FALSE	Pre-travel	Pre-travel	TRUE	Southern Asia	Southern Asia	TRUE
S036_T1	S002_T0	0.913269	S002_T0__S036_T1	FALSE	S036	S002	FALSE	Post-travel	Pre-travel	FALSE	Southeastern Asia	Southern Asia	FALSE
S014_T1	S002_T0	0.872648	S002_T0__S014_T1	FALSE	S014	S002	FALSE	Post-travel	Pre-travel	FALSE	Northern Africa	Southern Asia	FALSE
S172_T0	S002_T0	0.680237	S002_T0__S172_T0	FALSE	S172	S002	FALSE	Pre-travel	Pre-travel	TRUE	Northern Africa	Southern Asia	FALSE
S083_T1	S002_T0	0.498111	S002_T0__S083_T1	FALSE	S083	S002	FALSE	Post-travel	Pre-travel	FALSE	Northern Africa	Southern Asia	FALSE
S127_T0	S002_T0	0.590947	S002_T0__S127_T0	FALSE	S127	S002	FALSE	Pre-travel	Pre-travel	TRUE	Southeastern Asia	Southern Asia	FALSE
S026_T1	S002_T0	0.927461	S002_T0__S026_T1	FALSE	S026	S002	FALSE	Post-travel	Pre-travel	FALSE	Southeastern Asia	Southern Asia	FALSE
S187_T1	S002_T0	0.837761	S002_T0__S187_T1	FALSE	S187	S002	FALSE	Post-travel	Pre-travel	FALSE	Eastern Africa	Southern Asia	FALSE
S089_T0	S002_T0	0.824745	S002_T0__S089_T0	FALSE	S089	S002	FALSE	Pre-travel	Pre-travel	TRUE	Eastern Africa	Southern Asia	FALSE
S026_T0	S002_T0	0.778361	S002_T0__S026_T0	FALSE	S026	S002	FALSE	Pre-travel	Pre-travel	TRUE	Southeastern Asia	Southern Asia	FALSE
S157_T0	S002_T0	0.810818	S002_T0__S157_T0	FALSE	S157	S002	FALSE	Pre-travel	Pre-travel	TRUE	Southeastern Asia	Southern Asia	FALSE
S178_T0	S002_T0	0.863402	S002_T0__S178_T0	FALSE	S178	S002	FALSE	Pre-travel	Pre-travel	TRUE	Eastern Africa	Southern Asia	FALSE
S165_T0	S002_T0	0.80014	S002_T0__S165_T0	FALSE	S165	S002	FALSE	Pre-travel	Pre-travel	TRUE	Southern Asia	Southern Asia	TRUE
S141_T1	S002_T0	0.944098	S002_T0__S141_T1	FALSE	S141	S002	FALSE	Post-travel	Pre-travel	FALSE	Eastern Africa	Southern Asia	FALSE
S164_T1	S002_T0	0.623788	S002_T0__S164_T1	FALSE	S164	S002	FALSE	Post-travel	Pre-travel	FALSE	Southeastern Asia	Southern Asia	FALSE
S134_T1	S002_T0	0.649437	S002_T0__S134_T1	FALSE	S134	S002	FALSE	Post-travel	Pre-travel	FALSE	Southeastern Asia	Southern Asia	FALSE
S070_T1	S002_T0	0.946337	S002_T0__S070_T1	FALSE	S070	S002	FALSE	Post-travel	Pre-travel	FALSE	Southern Asia	Southern Asia	TRUE
S085_T1	S002_T0	0.734926	S002_T0__S085_T1	FALSE	S085	S002	FALSE	Post-travel	Pre-travel	FALSE	Southern Asia	Southern Asia	TRUE
S068_T1	S002_T0	0.835941	S002_T0__S068_T1	FALSE	S068	S002	FALSE	Post-travel	Pre-travel	FALSE	Eastern Africa	Southern Asia	FALSE
S039_T1	S002_T0	0.900152	S002_T0__S039_T1	FALSE	S039	S002	FALSE	Post-travel	Pre-travel	FALSE	Northern Africa	Southern Asia	FALSE
S071_T1	S002_T0	0.870348	S002_T0__S071_T1	FALSE	S071	S002	FALSE	Post-travel	Pre-travel	FALSE	Southeastern Asia	Southern Asia	FALSE
S155_T1	S002_T0	0.906379	S002_T0__S155_T1	FALSE	S155	S002	FALSE	Post-travel	Pre-travel	FALSE	Southern Asia	Southern Asia	TRUE
S023_T1	S002_T0	0.958487	S002_T0__S023_T1	FALSE	S023	S002	FALSE	Post-travel	Pre-travel	FALSE	Southern Asia	Southern Asia	TRUE
S034_T0	S002_T0	0.548532	S002_T0__S034_T0	FALSE	S034	S002	FALSE	Pre-travel	Pre-travel	TRUE	Southern Asia	Southern Asia	TRUE
S096_T1	S002_T0	0.678526	S002_T0__S096_T1	FALSE	S096	S002	FALSE	Post-travel	Pre-travel	FALSE	Eastern Africa	Southern Asia	FALSE
S008_T1	S002_T0	0.647687	S002_T0__S008_T1	FALSE	S008	S002	FALSE	Post-travel	Pre-travel	FALSE	Northern Africa	Southern Asia	FALSE
S096_T0	S002_T0	0.887553	S002_T0__S096_T0	FALSE	S096	S002	FALSE	Pre-travel	Pre-travel	TRUE	Eastern Africa	Southern Asia	FALSE
S063_T0	S002_T0	0.962273	S002_T0__S063_T0	FALSE	S063	S002	FALSE	Pre-travel	Pre-travel	TRUE	Southeastern Asia	Southern Asia	FALSE
S084_T0	S002_T0	0.628463	S002_T0__S084_T0	FALSE	S084	S002	FALSE	Pre-travel	Pre-travel	TRUE	Southeastern Asia	Southern Asia	FALSE
S003_T1	S002_T0	0.635068	S002_T0__S003_T1	FALSE	S003	S002	FALSE	Post-travel	Pre-travel	FALSE	Southeastern Asia	Southern Asia	FALSE
S127_T1	S002_T0	0.812136	S002_T0__S127_T1	FALSE	S127	S002	FALSE	Post-travel	Pre-travel	FALSE	Southeastern Asia	Southern Asia	FALSE
S071_T0	S002_T0	0.651309	S002_T0__S071_T0	FALSE	S071	S002	FALSE	Pre-travel	Pre-travel	TRUE	Southeastern Asia	Southern Asia	FALSE
S032_T1	S002_T0	0.8689	S002_T0__S032_T1	FALSE	S032	S002	FALSE	Post-travel	Pre-travel	FALSE	Southeastern Asia	Southern Asia	FALSE
S075_T1	S002_T0	0.630987	S002_T0__S075_T1	FALSE	S075	S002	FALSE	Post-travel	Pre-travel	FALSE	Northern Africa	Southern Asia	FALSE
S163_T1	S002_T0	0.606936	S002_T0__S163_T1	FALSE	S163	S002	FALSE	Post-travel	Pre-travel	FALSE	Northern Africa	Southern Asia	FALSE
S155_T0	S002_T0	0.727651	S002_T0__S155_T0	FALSE	S155	S002	FALSE	Pre-travel	Pre-travel	TRUE	Southern Asia	Southern Asia	TRUE
S169_T0	S002_T0	0.895453	S002_T0__S169_T0	FALSE	S169	S002	FALSE	Pre-travel	Pre-travel	TRUE	Southern Asia	Southern Asia	TRUE
S058_T1	S002_T0	0.666084	S002_T0__S058_T1	FALSE	S058	S002	FALSE	Post-travel	Pre-travel	FALSE	Southern Asia	Southern Asia	TRUE
S173_T1	S002_T0	0.921169	S002_T0__S173_T1	FALSE	S173	S002	FALSE	Post-travel	Pre-travel	FALSE	Southeastern Asia	Southern Asia	FALSE
S137_T0	S002_T0	0.954914	S002_T0__S137_T0	FALSE	S137	S002	FALSE	Pre-travel	Pre-travel	TRUE	Southern Asia	Southern Asia	TRUE
S053_T1	S002_T0	0.856451	S002_T0__S053_T1	FALSE	S053	S002	FALSE	Post-travel	Pre-travel	FALSE	Northern Africa	Southern Asia	FALSE
S118_T0	S002_T0	0.849531	S002_T0__S118_T0	FALSE	S118	S002	FALSE	Pre-travel	Pre-travel	TRUE	Southern Asia	Southern Asia	TRUE
S164_T0	S002_T0	0.543922	S002_T0__S164_T0	FALSE	S164	S002	FALSE	Pre-travel	Pre-travel	TRUE	Southeastern Asia	Southern Asia	FALSE
S151_T0	S002_T0	0.875011	S002_T0__S151_T0	FALSE	S151	S002	FALSE	Pre-travel	Pre-travel	TRUE	Southern Asia	Southern Asia	TRUE
S162_T1	S002_T0	0.557081	S002_T0__S162_T1	FALSE	S162	S002	FALSE	Post-travel	Pre-travel	FALSE	Northern Africa	Southern Asia	FALSE
S151_T1	S002_T0	0.819038	S002_T0__S151_T1	FALSE	S151	S002	FALSE	Post-travel	Pre-travel	FALSE	Southern Asia	Southern Asia	TRUE
S132_T1	S002_T0	0.483619	S002_T0__S132_T1	FALSE	S132	S002	FALSE	Post-travel	Pre-travel	FALSE	Northern Africa	Southern Asia	FALSE
S056_T1	S002_T0	0.791098	S002_T0__S056_T1	FALSE	S056	S002	FALSE	Post-travel	Pre-travel	FALSE	Southern Asia	Southern Asia	TRUE
S133_T0	S002_T0	0.627773	S002_T0__S133_T0	FALSE	S133	S002	FALSE	Pre-travel	Pre-travel	TRUE	Southeastern Asia	Southern Asia	FALSE
S119_T0	S002_T0	0.767033	S002_T0__S119_T0	FALSE	S119	S002	FALSE	Pre-travel	Pre-travel	TRUE	Southeastern Asia	Southern Asia	FALSE
S033_T0	S002_T0	0.623388	S002_T0__S033_T0	FALSE	S033	S002	FALSE	Pre-travel	Pre-travel	TRUE	Southern Asia	Southern Asia	TRUE
S113_T1	S002_T0	0.648834	S002_T0__S113_T1	FALSE	S113	S002	FALSE	Post-travel	Pre-travel	FALSE	Eastern Africa	Southern Asia	FALSE
S052_T0	S002_T0	0.800529	S002_T0__S052_T0	FALSE	S052	S002	FALSE	Pre-travel	Pre-travel	TRUE	Southeastern Asia	Southern Asia	FALSE
S158_T1	S002_T0	0.754971	S002_T0__S158_T1	FALSE	S158	S002	FALSE	Post-travel	Pre-travel	FALSE	Southern Asia	Southern Asia	TRUE
S188_T1	S002_T0	0.735708	S002_T0__S188_T1	FALSE	S188	S002	FALSE	Post-travel	Pre-travel	FALSE	Northern Africa	Southern Asia	FALSE
S058_T0	S002_T0	0.72384	S002_T0__S058_T0	FALSE	S058	S002	FALSE	Pre-travel	Pre-travel	TRUE	Southern Asia	Southern Asia	TRUE
S064_T1	S002_T0	0.666044	S002_T0__S064_T1	FALSE	S064	S002	FALSE	Post-travel	Pre-travel	FALSE	Southeastern Asia	Southern Asia	FALSE
S112_T1	S002_T0	0.650121	S002_T0__S112_T1	FALSE	S112	S002	FALSE	Post-travel	Pre-travel	FALSE	Northern Africa	Southern Asia	FALSE
S146_T1	S002_T0	0.753631	S002_T0__S146_T1	FALSE	S146	S002	FALSE	Post-travel	Pre-travel	FALSE	Northern Africa	Southern Asia	FALSE
S117_T0	S002_T0	0.92362	S002_T0__S117_T0	FALSE	S117	S002	FALSE	Pre-travel	Pre-travel	TRUE	Southeastern Asia	Southern Asia	FALSE
S056_T0	S002_T0	0.791692	S002_T0__S056_T0	FALSE	S056	S002	FALSE	Pre-travel	Pre-travel	TRUE	Southern Asia	Southern Asia	TRUE
S011_T0	S002_T0	0.663306	S002_T0__S011_T0	FALSE	S011	S002	FALSE	Pre-travel	Pre-travel	TRUE	Southeastern Asia	Southern Asia	FALSE
S177_T1	S002_T0	0.951723	S002_T0__S177_T1	FALSE	S177	S002	FALSE	Post-travel	Pre-travel	FALSE	Southeastern Asia	Southern Asia	FALSE
S125_T1	S002_T0	0.790871	S002_T0__S125_T1	FALSE	S125	S002	FALSE	Post-travel	Pre-travel	FALSE	Southern Asia	Southern Asia	TRUE
S043_T0	S002_T0	0.729369	S002_T0__S043_T0	FALSE	S043	S002	FALSE	Pre-travel	Pre-travel	TRUE	Southeastern Asia	Southern Asia	FALSE
S181_T1	S002_T0	0.625136	S002_T0__S181_T1	FALSE	S181	S002	FALSE	Post-travel	Pre-travel	FALSE	Southern Asia	Southern Asia	TRUE
S070_T0	S002_T0	0.864623	S002_T0__S070_T0	FALSE	S070	S002	FALSE	Pre-travel	Pre-travel	TRUE	Southern Asia	Southern Asia	TRUE
S171_T0	S002_T0	0.901768	S002_T0__S171_T0	FALSE	S171	S002	FALSE	Pre-travel	Pre-travel	TRUE	Southeastern Asia	Southern Asia	FALSE
S150_T0	S002_T0	0.959905	S002_T0__S150_T0	FALSE	S150	S002	FALSE	Pre-travel	Pre-travel	TRUE	Northern Africa	Southern Asia	FALSE
S115_T0	S002_T0	0.426285	S002_T0__S115_T0	FALSE	S115	S002	FALSE	Pre-travel	Pre-travel	TRUE	Southeastern Asia	Southern Asia	FALSE
S023_T0	S002_T0	0.811578	S002_T0__S023_T0	FALSE	S023	S002	FALSE	Pre-travel	Pre-travel	TRUE	Southern Asia	Southern Asia	TRUE
S072_T1	S002_T0	0.767834	S002_T0__S072_T1	FALSE	S072	S002	FALSE	Post-travel	Pre-travel	FALSE	Eastern Africa	Southern Asia	FALSE
S079_T1	S002_T0	0.58382	S002_T0__S079_T1	FALSE	S079	S002	FALSE	Post-travel	Pre-travel	FALSE	Southern Asia	Southern Asia	TRUE
S180_T1	S002_T0	0.618555	S002_T0__S180_T1	FALSE	S180	S002	FALSE	Post-travel	Pre-travel	FALSE	Southern Asia	Southern Asia	TRUE
S046_T1	S002_T0	0.747678	S002_T0__S046_T1	FALSE	S046	S002	FALSE	Post-travel	Pre-travel	FALSE	Southern Asia	Southern Asia	TRUE
S185_T1	S002_T0	0.820954	S002_T0__S185_T1	FALSE	S185	S002	FALSE	Post-travel	Pre-travel	FALSE	Southeastern Asia	Southern Asia	FALSE
S086_T1	S002_T0	0.619964	S002_T0__S086_T1	FALSE	S086	S002	FALSE	Post-travel	Pre-travel	FALSE	Northern Africa	Southern Asia	FALSE
S008_T0	S002_T0	0.653516	S002_T0__S008_T0	FALSE	S008	S002	FALSE	Pre-travel	Pre-travel	TRUE	Northern Africa	Southern Asia	FALSE
S044_T1	S002_T0	0.913637	S002_T0__S044_T1	FALSE	S044	S002	FALSE	Post-travel	Pre-travel	FALSE	Southeastern Asia	Southern Asia	FALSE
S145_T0	S002_T0	0.652963	S002_T0__S145_T0	FALSE	S145	S002	FALSE	Pre-travel	Pre-travel	TRUE	Northern Africa	Southern Asia	FALSE
S013_T0	S002_T0	0.585647	S002_T0__S013_T0	FALSE	S013	S002	FALSE	Pre-travel	Pre-travel	TRUE	Eastern Africa	Southern Asia	FALSE
S188_T0	S002_T0	0.921255	S002_T0__S188_T0	FALSE	S188	S002	FALSE	Pre-travel	Pre-travel	TRUE	Northern Africa	Southern Asia	FALSE
S004_T1	S002_T0	0.634894	S002_T0__S004_T1	FALSE	S004	S002	FALSE	Post-travel	Pre-travel	FALSE	Southeastern Asia	Southern Asia	FALSE
S020_T1	S002_T0	0.95803	S002_T0__S020_T1	FALSE	S020	S002	FALSE	Post-travel	Pre-travel	FALSE	Southeastern Asia	Southern Asia	FALSE
S002_T1	S002_T0	0.382389	S002_T0__S002_T1	FALSE	S002	S002	TRUE	Post-travel	Pre-travel	FALSE	Southern Asia	Southern Asia	TRUE
S087_T1	S002_T0	0.787388	S002_T0__S087_T1	FALSE	S087	S002	FALSE	Post-travel	Pre-travel	FALSE	Eastern Africa	Southern Asia	FALSE
S095_T1	S002_T0	0.70783	S002_T0__S095_T1	FALSE	S095	S002	FALSE	Post-travel	Pre-travel	FALSE	Northern Africa	Southern Asia	FALSE
S078_T0	S002_T0	0.438817	S002_T0__S078_T0	FALSE	S078	S002	FALSE	Pre-travel	Pre-travel	TRUE	Eastern Africa	Southern Asia	FALSE
S144_T0	S002_T0	0.92247	S002_T0__S144_T0	FALSE	S144	S002	FALSE	Pre-travel	Pre-travel	TRUE	Eastern Africa	Southern Asia	FALSE
S180_T0	S002_T0	0.413757	S002_T0__S180_T0	FALSE	S180	S002	FALSE	Pre-travel	Pre-travel	TRUE	Southern Asia	Southern Asia	TRUE
S091_T1	S002_T0	0.49169	S002_T0__S091_T1	FALSE	S091	S002	FALSE	Post-travel	Pre-travel	FALSE	Eastern Africa	Southern Asia	FALSE
S077_T1	S002_T0	0.711423	S002_T0__S077_T1	FALSE	S077	S002	FALSE	Post-travel	Pre-travel	FALSE	Eastern Africa	Southern Asia	FALSE
S078_T1	S002_T0	0.712314	S002_T0__S078_T1	FALSE	S078	S002	FALSE	Post-travel	Pre-travel	FALSE	Eastern Africa	Southern Asia	FALSE
S061_T0	S002_T0	0.613118	S002_T0__S061_T0	FALSE	S061	S002	FALSE	Pre-travel	Pre-travel	TRUE	Southeastern Asia	Southern Asia	FALSE
S101_T0	S002_T0	0.899627	S002_T0__S101_T0	FALSE	S101	S002	FALSE	Pre-travel	Pre-travel	TRUE	Southeastern Asia	Southern Asia	FALSE
S093_T1	S002_T0	0.746109	S002_T0__S093_T1	FALSE	S093	S002	FALSE	Post-travel	Pre-travel	FALSE	Northern Africa	Southern Asia	FALSE
S004_T0	S002_T0	0.477759	S002_T0__S004_T0	FALSE	S004	S002	FALSE	Pre-travel	Pre-travel	TRUE	Southeastern Asia	Southern Asia	FALSE
S162_T0	S002_T0	0.804114	S002_T0__S162_T0	FALSE	S162	S002	FALSE	Pre-travel	Pre-travel	TRUE	Northern Africa	Southern Asia	FALSE
S123_T1	S002_T0	0.529459	S002_T0__S123_T1	FALSE	S123	S002	FALSE	Post-travel	Pre-travel	FALSE	Eastern Africa	Southern Asia	FALSE
S154_T1	S002_T0	0.644132	S002_T0__S154_T1	FALSE	S154	S002	FALSE	Post-travel	Pre-travel	FALSE	Southern Asia	Southern Asia	TRUE
S172_T1	S002_T0	0.921366	S002_T0__S172_T1	FALSE	S172	S002	FALSE	Post-travel	Pre-travel	FALSE	Northern Africa	Southern Asia	FALSE
S028_T0	S002_T0	0.782448	S002_T0__S028_T0	FALSE	S028	S002	FALSE	Pre-travel	Pre-travel	TRUE	Southeastern Asia	Southern Asia	FALSE
S130_T1	S002_T0	0.858253	S002_T0__S130_T1	FALSE	S130	S002	FALSE	Post-travel	Pre-travel	FALSE	Southeastern Asia	Southern Asia	FALSE
S104_T1	S002_T0	0.845607	S002_T0__S104_T1	FALSE	S104	S002	FALSE	Post-travel	Pre-travel	FALSE	Northern Africa	Southern Asia	FALSE
S173_T0	S002_T0	0.863187	S002_T0__S173_T0	FALSE	S173	S002	FALSE	Pre-travel	Pre-travel	TRUE	Southeastern Asia	Southern Asia	FALSE
S121_T1	S002_T0	0.842719	S002_T0__S121_T1	FALSE	S121	S002	FALSE	Post-travel	Pre-travel	FALSE	Eastern Africa	Southern Asia	FALSE
S002_T0	S002_T0	0	S002_T0__S002_T0	TRUE	S002	S002	TRUE	Pre-travel	Pre-travel	TRUE	Southern Asia	Southern Asia	TRUE
S059_T1	S002_T0	0.863983	S002_T0__S059_T1	FALSE	S059	S002	FALSE	Post-travel	Pre-travel	FALSE	Southeastern Asia	Southern Asia	FALSE
S080_T1	S002_T0	0.607288	S002_T0__S080_T1	FALSE	S080	S002	FALSE	Post-travel	Pre-travel	FALSE	Southeastern Asia	Southern Asia	FALSE
S059_T0	S002_T0	0.618141	S002_T0__S059_T0	FALSE	S059	S002	FALSE	Pre-travel	Pre-travel	TRUE	Southeastern Asia	Southern Asia	FALSE
S114_T0	S002_T0	0.957968	S002_T0__S114_T0	FALSE	S114	S002	FALSE	Pre-travel	Pre-travel	TRUE	Eastern Africa	Southern Asia	FALSE
S141_T0	S002_T0	0.639396	S002_T0__S141_T0	FALSE	S141	S002	FALSE	Pre-travel	Pre-travel	TRUE	Eastern Africa	Southern Asia	FALSE
S166_T1	S002_T0	0.650577	S002_T0__S166_T1	FALSE	S166	S002	FALSE	Post-travel	Pre-travel	FALSE	Southern Asia	Southern Asia	TRUE
S038_T1	S002_T0	0.913638	S002_T0__S038_T1	FALSE	S038	S002	FALSE	Post-travel	Pre-travel	FALSE	Southeastern Asia	Southern Asia	FALSE
S118_T1	S002_T0	0.838376	S002_T0__S118_T1	FALSE	S118	S002	FALSE	Post-travel	Pre-travel	FALSE	Southern Asia	Southern Asia	TRUE
S100_T0	S002_T0	0.938243	S002_T0__S100_T0	FALSE	S100	S002	FALSE	Pre-travel	Pre-travel	TRUE	Southern Asia	Southern Asia	TRUE
S054_T0	S002_T0	0.637642	S002_T0__S054_T0	FALSE	S054	S002	FALSE	Pre-travel	Pre-travel	TRUE	Northern Africa	Southern Asia	FALSE
S110_T1	S002_T0	0.921774	S002_T0__S110_T1	FALSE	S110	S002	FALSE	Post-travel	Pre-travel	FALSE	Southeastern Asia	Southern Asia	FALSE
S049_T0	S002_T0	0.86684	S002_T0__S049_T0	FALSE	S049	S002	FALSE	Pre-travel	Pre-travel	TRUE	Northern Africa	Southern Asia	FALSE
S109_T0	S002_T0	0.775545	S002_T0__S109_T0	FALSE	S109	S002	FALSE	Pre-travel	Pre-travel	TRUE	Southern Asia	Southern Asia	TRUE
S076_T1	S002_T0	0.723201	S002_T0__S076_T1	FALSE	S076	S002	FALSE	Post-travel	Pre-travel	FALSE	Southeastern Asia	Southern Asia	FALSE
S099_T1	S002_T0	0.86569	S002_T0__S099_T1	FALSE	S099	S002	FALSE	Post-travel	Pre-travel	FALSE	Southern Asia	Southern Asia	TRUE
S140_T0	S002_T0	0.529684	S002_T0__S140_T0	FALSE	S140	S002	FALSE	Pre-travel	Pre-travel	TRUE	Southeastern Asia	Southern Asia	FALSE
S112_T0	S002_T0	0.801821	S002_T0__S112_T0	FALSE	S112	S002	FALSE	Pre-travel	Pre-travel	TRUE	Northern Africa	Southern Asia	FALSE
S084_T1	S002_T0	0.678754	S002_T0__S084_T1	FALSE	S084	S002	FALSE	Post-travel	Pre-travel	FALSE	Southeastern Asia	Southern Asia	FALSE
S134_T0	S002_T0	0.668046	S002_T0__S134_T0	FALSE	S134	S002	FALSE	Pre-travel	Pre-travel	TRUE	Southeastern Asia	Southern Asia	FALSE
S062_T0	S002_T0	0.570628	S002_T0__S062_T0	FALSE	S062	S002	FALSE	Pre-travel	Pre-travel	TRUE	Eastern Africa	Southern Asia	FALSE
S006_T1	S002_T0	0.634967	S002_T0__S006_T1	FALSE	S006	S002	FALSE	Post-travel	Pre-travel	FALSE	Southern Asia	Southern Asia	TRUE
S111_T0	S002_T0	0.604373	S002_T0__S111_T0	FALSE	S111	S002	FALSE	Pre-travel	Pre-travel	TRUE	Northern Africa	Southern Asia	FALSE
S081_T0	S002_T0	0.602235	S002_T0__S081_T0	FALSE	S081	S002	FALSE	Pre-travel	Pre-travel	TRUE	Southeastern Asia	Southern Asia	FALSE
S176_T1	S002_T0	0.88923	S002_T0__S176_T1	FALSE	S176	S002	FALSE	Post-travel	Pre-travel	FALSE	Northern Africa	Southern Asia	FALSE
S066_T1	S002_T0	0.875569	S002_T0__S066_T1	FALSE	S066	S002	FALSE	Post-travel	Pre-travel	FALSE	Eastern Africa	Southern Asia	FALSE
S046_T0	S002_T0	0.764202	S002_T0__S046_T0	FALSE	S046	S002	FALSE	Pre-travel	Pre-travel	TRUE	Southern Asia	Southern Asia	TRUE
S092_T0	S002_T0	0.928732	S002_T0__S092_T0	FALSE	S092	S002	FALSE	Pre-travel	Pre-travel	TRUE	Northern Africa	Southern Asia	FALSE
S138_T0	S002_T0	0.797618	S002_T0__S138_T0	FALSE	S138	S002	FALSE	Pre-travel	Pre-travel	TRUE	Southern Asia	Southern Asia	TRUE
S103_T0	S002_T0	0.563307	S002_T0__S103_T0	FALSE	S103	S002	FALSE	Pre-travel	Pre-travel	TRUE	Northern Africa	Southern Asia	FALSE
S065_T1	S002_T1	0.928323	S002_T1__S065_T1	FALSE	S065	S002	FALSE	Post-travel	Post-travel	TRUE	Eastern Africa	Southern Asia	FALSE
S155_T1	S002_T1	0.912219	S002_T1__S155_T1	FALSE	S155	S002	FALSE	Post-travel	Post-travel	TRUE	Southern Asia	Southern Asia	TRUE
S149_T0	S002_T1	0.923729	S002_T1__S149_T0	FALSE	S149	S002	FALSE	Pre-travel	Post-travel	FALSE	Eastern Africa	Southern Asia	FALSE
S110_T0	S002_T1	0.940454	S002_T1__S110_T0	FALSE	S110	S002	FALSE	Pre-travel	Post-travel	FALSE	Southeastern Asia	Southern Asia	FALSE
S003_T1	S002_T1	0.589049	S002_T1__S003_T1	FALSE	S003	S002	FALSE	Post-travel	Post-travel	TRUE	Southeastern Asia	Southern Asia	FALSE
S145_T1	S002_T1	0.853865	S002_T1__S145_T1	FALSE	S145	S002	FALSE	Post-travel	Post-travel	TRUE	Northern Africa	Southern Asia	FALSE
S094_T0	S002_T1	0.550555	S002_T1__S094_T0	FALSE	S094	S002	FALSE	Pre-travel	Post-travel	FALSE	Northern Africa	Southern Asia	FALSE
S043_T1	S002_T1	0.794615	S002_T1__S043_T1	FALSE	S043	S002	FALSE	Post-travel	Post-travel	TRUE	Southeastern Asia	Southern Asia	FALSE
S131_T1	S002_T1	0.949412	S002_T1__S131_T1	FALSE	S131	S002	FALSE	Post-travel	Post-travel	TRUE	Northern Africa	Southern Asia	FALSE
S040_T1	S002_T1	0.923083	S002_T1__S040_T1	FALSE	S040	S002	FALSE	Post-travel	Post-travel	TRUE	Northern Africa	Southern Asia	FALSE
S151_T0	S002_T1	0.906077	S002_T1__S151_T0	FALSE	S151	S002	FALSE	Pre-travel	Post-travel	FALSE	Southern Asia	Southern Asia	TRUE
S005_T1	S002_T1	0.749127	S002_T1__S005_T1	FALSE	S005	S002	FALSE	Post-travel	Post-travel	TRUE	Southern Asia	Southern Asia	TRUE
S156_T0	S002_T1	0.957974	S002_T1__S156_T0	FALSE	S156	S002	FALSE	Pre-travel	Post-travel	FALSE	Southeastern Asia	Southern Asia	FALSE
S109_T0	S002_T1	0.81265	S002_T1__S109_T0	FALSE	S109	S002	FALSE	Pre-travel	Post-travel	FALSE	Southern Asia	Southern Asia	TRUE
S053_T0	S002_T1	0.985665	S002_T1__S053_T0	FALSE	S053	S002	FALSE	Pre-travel	Post-travel	FALSE	Northern Africa	Southern Asia	FALSE
S030_T1	S002_T1	0.939777	S002_T1__S030_T1	FALSE	S030	S002	FALSE	Post-travel	Post-travel	TRUE	Southeastern Asia	Southern Asia	FALSE
S125_T1	S002_T1	0.805749	S002_T1__S125_T1	FALSE	S125	S002	FALSE	Post-travel	Post-travel	TRUE	Southern Asia	Southern Asia	TRUE
S033_T1	S002_T1	0.704531	S002_T1__S033_T1	FALSE	S033	S002	FALSE	Post-travel	Post-travel	TRUE	Southern Asia	Southern Asia	TRUE
S122_T1	S002_T1	0.860876	S002_T1__S122_T1	FALSE	S122	S002	FALSE	Post-travel	Post-travel	TRUE	Southeastern Asia	Southern Asia	FALSE
S143_T0	S002_T1	0.963193	S002_T1__S143_T0	FALSE	S143	S002	FALSE	Pre-travel	Post-travel	FALSE	Eastern Africa	Southern Asia	FALSE
S097_T0	S002_T1	0.495523	S002_T1__S097_T0	FALSE	S097	S002	FALSE	Pre-travel	Post-travel	FALSE	Eastern Africa	Southern Asia	FALSE
S086_T0	S002_T1	0.565315	S002_T1__S086_T0	FALSE	S086	S002	FALSE	Pre-travel	Post-travel	FALSE	Northern Africa	Southern Asia	FALSE
S050_T0	S002_T1	0.498976	S002_T1__S050_T0	FALSE	S050	S002	FALSE	Pre-travel	Post-travel	FALSE	Southern Asia	Southern Asia	TRUE
S178_T1	S002_T1	0.702034	S002_T1__S178_T1	FALSE	S178	S002	FALSE	Post-travel	Post-travel	TRUE	Eastern Africa	Southern Asia	FALSE
S188_T0	S002_T1	0.938401	S002_T1__S188_T0	FALSE	S188	S002	FALSE	Pre-travel	Post-travel	FALSE	Northern Africa	Southern Asia	FALSE
S025_T0	S002_T1	0.932745	S002_T1__S025_T0	FALSE	S025	S002	FALSE	Pre-travel	Post-travel	FALSE	Southern Asia	Southern Asia	TRUE
S126_T0	S002_T1	0.679408	S002_T1__S126_T0	FALSE	S126	S002	FALSE	Pre-travel	Post-travel	FALSE	Southeastern Asia	Southern Asia	FALSE
S142_T1	S002_T1	0.825784	S002_T1__S142_T1	FALSE	S142	S002	FALSE	Post-travel	Post-travel	TRUE	Eastern Africa	Southern Asia	FALSE
S078_T1	S002_T1	0.691055	S002_T1__S078_T1	FALSE	S078	S002	FALSE	Post-travel	Post-travel	TRUE	Eastern Africa	Southern Asia	FALSE
S094_T1	S002_T1	0.757789	S002_T1__S094_T1	FALSE	S094	S002	FALSE	Post-travel	Post-travel	TRUE	Northern Africa	Southern Asia	FALSE
S125_T0	S002_T1	0.903441	S002_T1__S125_T0	FALSE	S125	S002	FALSE	Pre-travel	Post-travel	FALSE	Southern Asia	Southern Asia	TRUE
S150_T1	S002_T1	0.960964	S002_T1__S150_T1	FALSE	S150	S002	FALSE	Post-travel	Post-travel	TRUE	Northern Africa	Southern Asia	FALSE
S190_T1	S002_T1	0.955149	S002_T1__S190_T1	FALSE	S190	S002	FALSE	Post-travel	Post-travel	TRUE	Eastern Africa	Southern Asia	FALSE
S169_T1	S002_T1	0.800698	S002_T1__S169_T1	FALSE	S169	S002	FALSE	Post-travel	Post-travel	TRUE	Southern Asia	Southern Asia	TRUE
S089_T0	S002_T1	0.860024	S002_T1__S089_T0	FALSE	S089	S002	FALSE	Pre-travel	Post-travel	FALSE	Eastern Africa	Southern Asia	FALSE
S097_T1	S002_T1	0.860613	S002_T1__S097_T1	FALSE	S097	S002	FALSE	Post-travel	Post-travel	TRUE	Eastern Africa	Southern Asia	FALSE
S106_T0	S002_T1	0.75258	S002_T1__S106_T0	FALSE	S106	S002	FALSE	Pre-travel	Post-travel	FALSE	Southeastern Asia	Southern Asia	FALSE
S038_T0	S002_T1	0.610147	S002_T1__S038_T0	FALSE	S038	S002	FALSE	Pre-travel	Post-travel	FALSE	Southeastern Asia	Southern Asia	FALSE
S153_T1	S002_T1	0.918786	S002_T1__S153_T1	FALSE	S153	S002	FALSE	Post-travel	Post-travel	TRUE	Eastern Africa	Southern Asia	FALSE
S120_T1	S002_T1	0.865648	S002_T1__S120_T1	FALSE	S120	S002	FALSE	Post-travel	Post-travel	TRUE	Southern Asia	Southern Asia	TRUE
S105_T0	S002_T1	0.790132	S002_T1__S105_T0	FALSE	S105	S002	FALSE	Pre-travel	Post-travel	FALSE	Eastern Africa	Southern Asia	FALSE
S098_T0	S002_T1	0.794177	S002_T1__S098_T0	FALSE	S098	S002	FALSE	Pre-travel	Post-travel	FALSE	Eastern Africa	Southern Asia	FALSE
S158_T1	S002_T1	0.682037	S002_T1__S158_T1	FALSE	S158	S002	FALSE	Post-travel	Post-travel	TRUE	Southern Asia	Southern Asia	TRUE
S035_T0	S002_T1	0.693799	S002_T1__S035_T0	FALSE	S035	S002	FALSE	Pre-travel	Post-travel	FALSE	Eastern Africa	Southern Asia	FALSE
S008_T1	S002_T1	0.536432	S002_T1__S008_T1	FALSE	S008	S002	FALSE	Post-travel	Post-travel	TRUE	Northern Africa	Southern Asia	FALSE
S115_T1	S002_T1	0.297374	S002_T1__S115_T1	FALSE	S115	S002	FALSE	Post-travel	Post-travel	TRUE	Southeastern Asia	Southern Asia	FALSE
S115_T0	S002_T1	0.437038	S002_T1__S115_T0	FALSE	S115	S002	FALSE	Pre-travel	Post-travel	FALSE	Southeastern Asia	Southern Asia	FALSE
S038_T1	S002_T1	0.920269	S002_T1__S038_T1	FALSE	S038	S002	FALSE	Post-travel	Post-travel	TRUE	Southeastern Asia	Southern Asia	FALSE
S187_T1	S002_T1	0.810352	S002_T1__S187_T1	FALSE	S187	S002	FALSE	Post-travel	Post-travel	TRUE	Eastern Africa	Southern Asia	FALSE
S148_T0	S002_T1	0.962317	S002_T1__S148_T0	FALSE	S148	S002	FALSE	Pre-travel	Post-travel	FALSE	Northern Africa	Southern Asia	FALSE
S063_T0	S002_T1	0.984458	S002_T1__S063_T0	FALSE	S063	S002	FALSE	Pre-travel	Post-travel	FALSE	Southeastern Asia	Southern Asia	FALSE
S064_T1	S002_T1	0.698673	S002_T1__S064_T1	FALSE	S064	S002	FALSE	Post-travel	Post-travel	TRUE	Southeastern Asia	Southern Asia	FALSE
S090_T1	S002_T1	0.939145	S002_T1__S090_T1	FALSE	S090	S002	FALSE	Post-travel	Post-travel	TRUE	Eastern Africa	Southern Asia	FALSE
S104_T1	S002_T1	0.888952	S002_T1__S104_T1	FALSE	S104	S002	FALSE	Post-travel	Post-travel	TRUE	Northern Africa	Southern Asia	FALSE
S091_T0	S002_T1	0.821422	S002_T1__S091_T0	FALSE	S091	S002	FALSE	Pre-travel	Post-travel	FALSE	Eastern Africa	Southern Asia	FALSE
S170_T1	S002_T1	0.957352	S002_T1__S170_T1	FALSE	S170	S002	FALSE	Post-travel	Post-travel	TRUE	Southeastern Asia	Southern Asia	FALSE
S002_T1	S002_T1	0	S002_T1__S002_T1	TRUE	S002	S002	TRUE	Post-travel	Post-travel	TRUE	Southern Asia	Southern Asia	TRUE
S154_T0	S002_T1	0.563161	S002_T1__S154_T0	FALSE	S154	S002	FALSE	Pre-travel	Post-travel	FALSE	Southern Asia	Southern Asia	TRUE
S053_T1	S002_T1	0.920764	S002_T1__S053_T1	FALSE	S053	S002	FALSE	Post-travel	Post-travel	TRUE	Northern Africa	Southern Asia	FALSE
S085_T0	S002_T1	0.414653	S002_T1__S085_T0	FALSE	S085	S002	FALSE	Pre-travel	Post-travel	FALSE	Southern Asia	Southern Asia	TRUE
S143_T1	S002_T1	0.923583	S002_T1__S143_T1	FALSE	S143	S002	FALSE	Post-travel	Post-travel	TRUE	Eastern Africa	Southern Asia	FALSE
S017_T0	S002_T1	0.86091	S002_T1__S017_T0	FALSE	S017	S002	FALSE	Pre-travel	Post-travel	FALSE	Southern Asia	Southern Asia	TRUE
S184_T0	S002_T1	0.572364	S002_T1__S184_T0	FALSE	S184	S002	FALSE	Pre-travel	Post-travel	FALSE	Northern Africa	Southern Asia	FALSE
S005_T0	S002_T1	0.758268	S002_T1__S005_T0	FALSE	S005	S002	FALSE	Pre-travel	Post-travel	FALSE	Southern Asia	Southern Asia	TRUE
S051_T1	S002_T1	0.545151	S002_T1__S051_T1	FALSE	S051	S002	FALSE	Post-travel	Post-travel	TRUE	Southern Asia	Southern Asia	TRUE
S027_T0	S002_T1	0.514318	S002_T1__S027_T0	FALSE	S027	S002	FALSE	Pre-travel	Post-travel	FALSE	Eastern Africa	Southern Asia	FALSE
S087_T1	S002_T1	0.808087	S002_T1__S087_T1	FALSE	S087	S002	FALSE	Post-travel	Post-travel	TRUE	Eastern Africa	Southern Asia	FALSE
S045_T1	S002_T1	0.857128	S002_T1__S045_T1	FALSE	S045	S002	FALSE	Post-travel	Post-travel	TRUE	Southern Asia	Southern Asia	TRUE
S034_T1	S002_T1	0.462673	S002_T1__S034_T1	FALSE	S034	S002	FALSE	Post-travel	Post-travel	TRUE	Southern Asia	Southern Asia	TRUE
S007_T1	S002_T1	0.762889	S002_T1__S007_T1	FALSE	S007	S002	FALSE	Post-travel	Post-travel	TRUE	Southern Asia	Southern Asia	TRUE
S101_T0	S002_T1	0.917002	S002_T1__S101_T0	FALSE	S101	S002	FALSE	Pre-travel	Post-travel	FALSE	Southeastern Asia	Southern Asia	FALSE
S152_T1	S002_T1	0.919593	S002_T1__S152_T1	FALSE	S152	S002	FALSE	Post-travel	Post-travel	TRUE	Eastern Africa	Southern Asia	FALSE
S188_T1	S002_T1	0.794723	S002_T1__S188_T1	FALSE	S188	S002	FALSE	Post-travel	Post-travel	TRUE	Northern Africa	Southern Asia	FALSE
S079_T1	S002_T1	0.706791	S002_T1__S079_T1	FALSE	S079	S002	FALSE	Post-travel	Post-travel	TRUE	Southern Asia	Southern Asia	TRUE
S060_T1	S002_T1	0.799859	S002_T1__S060_T1	FALSE	S060	S002	FALSE	Post-travel	Post-travel	TRUE	Eastern Africa	Southern Asia	FALSE
S135_T1	S002_T1	0.747546	S002_T1__S135_T1	FALSE	S135	S002	FALSE	Post-travel	Post-travel	TRUE	Southern Asia	Southern Asia	TRUE
S102_T0	S002_T1	0.832443	S002_T1__S102_T0	FALSE	S102	S002	FALSE	Pre-travel	Post-travel	FALSE	Southeastern Asia	Southern Asia	FALSE
S010_T0	S002_T1	0.519301	S002_T1__S010_T0	FALSE	S010	S002	FALSE	Pre-travel	Post-travel	FALSE	Eastern Africa	Southern Asia	FALSE
S027_T1	S002_T1	0.703369	S002_T1__S027_T1	FALSE	S027	S002	FALSE	Post-travel	Post-travel	TRUE	Eastern Africa	Southern Asia	FALSE
S058_T1	S002_T1	0.583088	S002_T1__S058_T1	FALSE	S058	S002	FALSE	Post-travel	Post-travel	TRUE	Southern Asia	Southern Asia	TRUE
S183_T0	S002_T1	0.858412	S002_T1__S183_T0	FALSE	S183	S002	FALSE	Pre-travel	Post-travel	FALSE	Southern Asia	Southern Asia	TRUE
S157_T1	S002_T1	0.670878	S002_T1__S157_T1	FALSE	S157	S002	FALSE	Post-travel	Post-travel	TRUE	Southeastern Asia	Southern Asia	FALSE
S148_T1	S002_T1	0.95127	S002_T1__S148_T1	FALSE	S148	S002	FALSE	Post-travel	Post-travel	TRUE	Northern Africa	Southern Asia	FALSE
S009_T1	S002_T1	0.640155	S002_T1__S009_T1	FALSE	S009	S002	FALSE	Post-travel	Post-travel	TRUE	Northern Africa	Southern Asia	FALSE
S047_T0	S002_T1	0.590532	S002_T1__S047_T0	FALSE	S047	S002	FALSE	Pre-travel	Post-travel	FALSE	Southern Asia	Southern Asia	TRUE
S082_T1	S002_T1	0.555449	S002_T1__S082_T1	FALSE	S082	S002	FALSE	Post-travel	Post-travel	TRUE	Northern Africa	Southern Asia	FALSE
S116_T1	S002_T1	0.897418	S002_T1__S116_T1	FALSE	S116	S002	FALSE	Post-travel	Post-travel	TRUE	Southeastern Asia	Southern Asia	FALSE
S174_T0	S002_T1	0.796055	S002_T1__S174_T0	FALSE	S174	S002	FALSE	Pre-travel	Post-travel	FALSE	Southeastern Asia	Southern Asia	FALSE
S037_T0	S002_T1	0.619809	S002_T1__S037_T0	FALSE	S037	S002	FALSE	Pre-travel	Post-travel	FALSE	Southeastern Asia	Southern Asia	FALSE
S041_T0	S002_T1	0.871892	S002_T1__S041_T0	FALSE	S041	S002	FALSE	Pre-travel	Post-travel	FALSE	Southern Asia	Southern Asia	TRUE
S130_T1	S002_T1	0.86481	S002_T1__S130_T1	FALSE	S130	S002	FALSE	Post-travel	Post-travel	TRUE	Southeastern Asia	Southern Asia	FALSE
S043_T0	S002_T1	0.740189	S002_T1__S043_T0	FALSE	S043	S002	FALSE	Pre-travel	Post-travel	FALSE	Southeastern Asia	Southern Asia	FALSE
S124_T1	S002_T1	0.649112	S002_T1__S124_T1	FALSE	S124	S002	FALSE	Post-travel	Post-travel	TRUE	Southeastern Asia	Southern Asia	FALSE
S055_T1	S002_T1	0.685887	S002_T1__S055_T1	FALSE	S055	S002	FALSE	Post-travel	Post-travel	TRUE	Eastern Africa	Southern Asia	FALSE
S009_T0	S002_T1	0.622064	S002_T1__S009_T0	FALSE	S009	S002	FALSE	Pre-travel	Post-travel	FALSE	Northern Africa	Southern Asia	FALSE
S072_T1	S002_T1	0.772285	S002_T1__S072_T1	FALSE	S072	S002	FALSE	Post-travel	Post-travel	TRUE	Eastern Africa	Southern Asia	FALSE
S073_T1	S002_T1	0.887213	S002_T1__S073_T1	FALSE	S073	S002	FALSE	Post-travel	Post-travel	TRUE	Eastern Africa	Southern Asia	FALSE
S016_T1	S002_T1	0.805955	S002_T1__S016_T1	FALSE	S016	S002	FALSE	Post-travel	Post-travel	TRUE	Northern Africa	Southern Asia	FALSE
S021_T1	S002_T1	0.878344	S002_T1__S021_T1	FALSE	S021	S002	FALSE	Post-travel	Post-travel	TRUE	Northern Africa	Southern Asia	FALSE
S064_T0	S002_T1	0.974117	S002_T1__S064_T0	FALSE	S064	S002	FALSE	Pre-travel	Post-travel	FALSE	Southeastern Asia	Southern Asia	FALSE
S100_T1	S002_T1	0.961463	S002_T1__S100_T1	FALSE	S100	S002	FALSE	Post-travel	Post-travel	TRUE	Southern Asia	Southern Asia	TRUE
S081_T1	S002_T1	0.365802	S002_T1__S081_T1	FALSE	S081	S002	FALSE	Post-travel	Post-travel	TRUE	Southeastern Asia	Southern Asia	FALSE
S165_T0	S002_T1	0.804778	S002_T1__S165_T0	FALSE	S165	S002	FALSE	Pre-travel	Post-travel	FALSE	Southern Asia	Southern Asia	TRUE
S006_T0	S002_T1	0.57043	S002_T1__S006_T0	FALSE	S006	S002	FALSE	Pre-travel	Post-travel	FALSE	Southern Asia	Southern Asia	TRUE
S084_T1	S002_T1	0.77466	S002_T1__S084_T1	FALSE	S084	S002	FALSE	Post-travel	Post-travel	TRUE	Southeastern Asia	Southern Asia	FALSE
S036_T1	S002_T1	0.941475	S002_T1__S036_T1	FALSE	S036	S002	FALSE	Post-travel	Post-travel	TRUE	Southeastern Asia	Southern Asia	FALSE
S042_T0	S002_T1	0.846155	S002_T1__S042_T0	FALSE	S042	S002	FALSE	Pre-travel	Post-travel	FALSE	Eastern Africa	Southern Asia	FALSE
S019_T1	S002_T1	0.490334	S002_T1__S019_T1	FALSE	S019	S002	FALSE	Post-travel	Post-travel	TRUE	Northern Africa	Southern Asia	FALSE
S124_T0	S002_T1	0.878385	S002_T1__S124_T0	FALSE	S124	S002	FALSE	Pre-travel	Post-travel	FALSE	Southeastern Asia	Southern Asia	FALSE
S168_T0	S002_T1	0.868975	S002_T1__S168_T0	FALSE	S168	S002	FALSE	Pre-travel	Post-travel	FALSE	Southern Asia	Southern Asia	TRUE
S157_T0	S002_T1	0.76396	S002_T1__S157_T0	FALSE	S157	S002	FALSE	Pre-travel	Post-travel	FALSE	Southeastern Asia	Southern Asia	FALSE
S178_T0	S002_T1	0.895994	S002_T1__S178_T0	FALSE	S178	S002	FALSE	Pre-travel	Post-travel	FALSE	Eastern Africa	Southern Asia	FALSE
S029_T0	S002_T1	0.930615	S002_T1__S029_T0	FALSE	S029	S002	FALSE	Pre-travel	Post-travel	FALSE	Eastern Africa	Southern Asia	FALSE
S011_T1	S002_T1	0.634907	S002_T1__S011_T1	FALSE	S011	S002	FALSE	Post-travel	Post-travel	TRUE	Southeastern Asia	Southern Asia	FALSE
S120_T0	S002_T1	0.909718	S002_T1__S120_T0	FALSE	S120	S002	FALSE	Pre-travel	Post-travel	FALSE	Southern Asia	Southern Asia	TRUE
S068_T1	S002_T1	0.858606	S002_T1__S068_T1	FALSE	S068	S002	FALSE	Post-travel	Post-travel	TRUE	Eastern Africa	Southern Asia	FALSE
S163_T1	S002_T1	0.643722	S002_T1__S163_T1	FALSE	S163	S002	FALSE	Post-travel	Post-travel	TRUE	Northern Africa	Southern Asia	FALSE
S021_T0	S002_T1	0.912948	S002_T1__S021_T0	FALSE	S021	S002	FALSE	Pre-travel	Post-travel	FALSE	Northern Africa	Southern Asia	FALSE
S128_T1	S002_T1	0.907744	S002_T1__S128_T1	FALSE	S128	S002	FALSE	Post-travel	Post-travel	TRUE	Northern Africa	Southern Asia	FALSE
S068_T0	S002_T1	0.878366	S002_T1__S068_T0	FALSE	S068	S002	FALSE	Pre-travel	Post-travel	FALSE	Eastern Africa	Southern Asia	FALSE
S111_T1	S002_T1	0.586717	S002_T1__S111_T1	FALSE	S111	S002	FALSE	Post-travel	Post-travel	TRUE	Northern Africa	Southern Asia	FALSE
S057_T0	S002_T1	0.577854	S002_T1__S057_T0	FALSE	S057	S002	FALSE	Pre-travel	Post-travel	FALSE	Southern Asia	Southern Asia	TRUE
S075_T1	S002_T1	0.687455	S002_T1__S075_T1	FALSE	S075	S002	FALSE	Post-travel	Post-travel	TRUE	Northern Africa	Southern Asia	FALSE
S007_T0	S002_T1	0.463412	S002_T1__S007_T0	FALSE	S007	S002	FALSE	Pre-travel	Post-travel	FALSE	Southern Asia	Southern Asia	TRUE
S037_T1	S002_T1	0.385763	S002_T1__S037_T1	FALSE	S037	S002	FALSE	Post-travel	Post-travel	TRUE	Southeastern Asia	Southern Asia	FALSE
S099_T1	S002_T1	0.82839	S002_T1__S099_T1	FALSE	S099	S002	FALSE	Post-travel	Post-travel	TRUE	Southern Asia	Southern Asia	TRUE
S133_T0	S002_T1	0.7314	S002_T1__S133_T0	FALSE	S133	S002	FALSE	Pre-travel	Post-travel	FALSE	Southeastern Asia	Southern Asia	FALSE
S069_T0	S002_T1	0.360494	S002_T1__S069_T0	FALSE	S069	S002	FALSE	Pre-travel	Post-travel	FALSE	Southern Asia	Southern Asia	TRUE
S117_T0	S002_T1	0.923375	S002_T1__S117_T0	FALSE	S117	S002	FALSE	Pre-travel	Post-travel	FALSE	Southeastern Asia	Southern Asia	FALSE
S011_T0	S002_T1	0.594665	S002_T1__S011_T0	FALSE	S011	S002	FALSE	Pre-travel	Post-travel	FALSE	Southeastern Asia	Southern Asia	FALSE
S092_T1	S002_T1	0.93129	S002_T1__S092_T1	FALSE	S092	S002	FALSE	Post-travel	Post-travel	TRUE	Northern Africa	Southern Asia	FALSE
S175_T1	S002_T1	0.674942	S002_T1__S175_T1	FALSE	S175	S002	FALSE	Post-travel	Post-travel	TRUE	Northern Africa	Southern Asia	FALSE
S142_T0	S002_T1	0.811218	S002_T1__S142_T0	FALSE	S142	S002	FALSE	Pre-travel	Post-travel	FALSE	Eastern Africa	Southern Asia	FALSE
S147_T0	S002_T1	0.719156	S002_T1__S147_T0	FALSE	S147	S002	FALSE	Pre-travel	Post-travel	FALSE	Southern Asia	Southern Asia	TRUE
S171_T0	S002_T1	0.945402	S002_T1__S171_T0	FALSE	S171	S002	FALSE	Pre-travel	Post-travel	FALSE	Southeastern Asia	Southern Asia	FALSE
S052_T1	S002_T1	0.766552	S002_T1__S052_T1	FALSE	S052	S002	FALSE	Post-travel	Post-travel	TRUE	Southeastern Asia	Southern Asia	FALSE
S066_T1	S002_T1	0.870956	S002_T1__S066_T1	FALSE	S066	S002	FALSE	Post-travel	Post-travel	TRUE	Eastern Africa	Southern Asia	FALSE
S015_T0	S002_T1	0.523571	S002_T1__S015_T0	FALSE	S015	S002	FALSE	Pre-travel	Post-travel	FALSE	Southern Asia	Southern Asia	TRUE
S074_T0	S002_T1	0.717958	S002_T1__S074_T0	FALSE	S074	S002	FALSE	Pre-travel	Post-travel	FALSE	Northern Africa	Southern Asia	FALSE
S106_T1	S002_T1	0.784623	S002_T1__S106_T1	FALSE	S106	S002	FALSE	Post-travel	Post-travel	TRUE	Southeastern Asia	Southern Asia	FALSE
S182_T0	S002_T1	0.463407	S002_T1__S182_T0	FALSE	S182	S002	FALSE	Pre-travel	Post-travel	FALSE	Northern Africa	Southern Asia	FALSE
S062_T1	S002_T1	0.896793	S002_T1__S062_T1	FALSE	S062	S002	FALSE	Post-travel	Post-travel	TRUE	Eastern Africa	Southern Asia	FALSE
S137_T1	S002_T1	0.909283	S002_T1__S137_T1	FALSE	S137	S002	FALSE	Post-travel	Post-travel	TRUE	Southern Asia	Southern Asia	TRUE
S172_T0	S002_T1	0.734896	S002_T1__S172_T0	FALSE	S172	S002	FALSE	Pre-travel	Post-travel	FALSE	Northern Africa	Southern Asia	FALSE
S024_T0	S002_T1	0.670503	S002_T1__S024_T0	FALSE	S024	S002	FALSE	Pre-travel	Post-travel	FALSE	Southern Asia	Southern Asia	TRUE
S160_T0	S002_T1	0.866548	S002_T1__S160_T0	FALSE	S160	S002	FALSE	Pre-travel	Post-travel	FALSE	Southeastern Asia	Southern Asia	FALSE
S059_T0	S002_T1	0.661875	S002_T1__S059_T0	FALSE	S059	S002	FALSE	Pre-travel	Post-travel	FALSE	Southeastern Asia	Southern Asia	FALSE
S004_T0	S002_T1	0.484288	S002_T1__S004_T0	FALSE	S004	S002	FALSE	Pre-travel	Post-travel	FALSE	Southeastern Asia	Southern Asia	FALSE
S167_T0	S002_T1	0.517816	S002_T1__S167_T0	FALSE	S167	S002	FALSE	Pre-travel	Post-travel	FALSE	Eastern Africa	Southern Asia	FALSE
S034_T0	S002_T1	0.378788	S002_T1__S034_T0	FALSE	S034	S002	FALSE	Pre-travel	Post-travel	FALSE	Southern Asia	Southern Asia	TRUE
S102_T1	S002_T1	0.767174	S002_T1__S102_T1	FALSE	S102	S002	FALSE	Post-travel	Post-travel	TRUE	Southeastern Asia	Southern Asia	FALSE
S048_T0	S002_T1	0.682402	S002_T1__S048_T0	FALSE	S048	S002	FALSE	Pre-travel	Post-travel	FALSE	Northern Africa	Southern Asia	FALSE
S013_T0	S002_T1	0.542814	S002_T1__S013_T0	FALSE	S013	S002	FALSE	Pre-travel	Post-travel	FALSE	Eastern Africa	Southern Asia	FALSE
S071_T1	S002_T1	0.861708	S002_T1__S071_T1	FALSE	S071	S002	FALSE	Post-travel	Post-travel	TRUE	Southeastern Asia	Southern Asia	FALSE
S174_T1	S002_T1	0.831512	S002_T1__S174_T1	FALSE	S174	S002	FALSE	Post-travel	Post-travel	TRUE	Southeastern Asia	Southern Asia	FALSE
S150_T0	S002_T1	0.972942	S002_T1__S150_T0	FALSE	S150	S002	FALSE	Pre-travel	Post-travel	FALSE	Northern Africa	Southern Asia	FALSE
S018_T0	S002_T1	0.393189	S002_T1__S018_T0	FALSE	S018	S002	FALSE	Pre-travel	Post-travel	FALSE	Eastern Africa	Southern Asia	FALSE
S114_T0	S002_T1	0.961877	S002_T1__S114_T0	FALSE	S114	S002	FALSE	Pre-travel	Post-travel	FALSE	Eastern Africa	Southern Asia	FALSE
S149_T1	S002_T1	0.921842	S002_T1__S149_T1	FALSE	S149	S002	FALSE	Post-travel	Post-travel	TRUE	Eastern Africa	Southern Asia	FALSE
S170_T0	S002_T1	0.726064	S002_T1__S170_T0	FALSE	S170	S002	FALSE	Pre-travel	Post-travel	FALSE	Southeastern Asia	Southern Asia	FALSE
S080_T0	S002_T1	0.295433	S002_T1__S080_T0	FALSE	S080	S002	FALSE	Pre-travel	Post-travel	FALSE	Southeastern Asia	Southern Asia	FALSE
S028_T1	S002_T1	0.846289	S002_T1__S028_T1	FALSE	S028	S002	FALSE	Post-travel	Post-travel	TRUE	Southeastern Asia	Southern Asia	FALSE
S083_T0	S002_T1	0.4762	S002_T1__S083_T0	FALSE	S083	S002	FALSE	Pre-travel	Post-travel	FALSE	Northern Africa	Southern Asia	FALSE
S024_T1	S002_T1	0.888046	S002_T1__S024_T1	FALSE	S024	S002	FALSE	Post-travel	Post-travel	TRUE	Southern Asia	Southern Asia	TRUE
S077_T1	S002_T1	0.731035	S002_T1__S077_T1	FALSE	S077	S002	FALSE	Post-travel	Post-travel	TRUE	Eastern Africa	Southern Asia	FALSE
S185_T0	S002_T1	0.637588	S002_T1__S185_T0	FALSE	S185	S002	FALSE	Pre-travel	Post-travel	FALSE	Southeastern Asia	Southern Asia	FALSE
S154_T1	S002_T1	0.614849	S002_T1__S154_T1	FALSE	S154	S002	FALSE	Post-travel	Post-travel	TRUE	Southern Asia	Southern Asia	TRUE
S070_T0	S002_T1	0.858166	S002_T1__S070_T0	FALSE	S070	S002	FALSE	Pre-travel	Post-travel	FALSE	Southern Asia	Southern Asia	TRUE
S181_T1	S002_T1	0.703715	S002_T1__S181_T1	FALSE	S181	S002	FALSE	Post-travel	Post-travel	TRUE	Southern Asia	Southern Asia	TRUE
S112_T0	S002_T1	0.834646	S002_T1__S112_T0	FALSE	S112	S002	FALSE	Pre-travel	Post-travel	FALSE	Northern Africa	Southern Asia	FALSE
S019_T0	S002_T1	0.465099	S002_T1__S019_T0	FALSE	S019	S002	FALSE	Pre-travel	Post-travel	FALSE	Northern Africa	Southern Asia	FALSE
S104_T0	S002_T1	0.773392	S002_T1__S104_T0	FALSE	S104	S002	FALSE	Pre-travel	Post-travel	FALSE	Northern Africa	Southern Asia	FALSE
S003_T0	S002_T1	0.287594	S002_T1__S003_T0	FALSE	S003	S002	FALSE	Pre-travel	Post-travel	FALSE	Southeastern Asia	Southern Asia	FALSE
S099_T0	S002_T1	0.939279	S002_T1__S099_T0	FALSE	S099	S002	FALSE	Pre-travel	Post-travel	FALSE	Southern Asia	Southern Asia	TRUE
S130_T0	S002_T1	0.882266	S002_T1__S130_T0	FALSE	S130	S002	FALSE	Pre-travel	Post-travel	FALSE	Southeastern Asia	Southern Asia	FALSE
S135_T0	S002_T1	0.790569	S002_T1__S135_T0	FALSE	S135	S002	FALSE	Pre-travel	Post-travel	FALSE	Southern Asia	Southern Asia	TRUE
S184_T1	S002_T1	0.812467	S002_T1__S184_T1	FALSE	S184	S002	FALSE	Post-travel	Post-travel	TRUE	Northern Africa	Southern Asia	FALSE
S022_T1	S002_T1	0.960703	S002_T1__S022_T1	FALSE	S022	S002	FALSE	Post-travel	Post-travel	TRUE	Northern Africa	Southern Asia	FALSE
S031_T1	S002_T1	0.767872	S002_T1__S031_T1	FALSE	S031	S002	FALSE	Post-travel	Post-travel	TRUE	Southern Asia	Southern Asia	TRUE
S022_T0	S002_T1	0.964469	S002_T1__S022_T0	FALSE	S022	S002	FALSE	Pre-travel	Post-travel	FALSE	Northern Africa	Southern Asia	FALSE
S060_T0	S002_T1	0.63103	S002_T1__S060_T0	FALSE	S060	S002	FALSE	Pre-travel	Post-travel	FALSE	Eastern Africa	Southern Asia	FALSE
S079_T0	S002_T1	0.804406	S002_T1__S079_T0	FALSE	S079	S002	FALSE	Pre-travel	Post-travel	FALSE	Southern Asia	Southern Asia	TRUE
S095_T1	S002_T1	0.704192	S002_T1__S095_T1	FALSE	S095	S002	FALSE	Post-travel	Post-travel	TRUE	Northern Africa	Southern Asia	FALSE
S173_T1	S002_T1	0.939506	S002_T1__S173_T1	FALSE	S173	S002	FALSE	Post-travel	Post-travel	TRUE	Southeastern Asia	Southern Asia	FALSE
S006_T1	S002_T1	0.625294	S002_T1__S006_T1	FALSE	S006	S002	FALSE	Post-travel	Post-travel	TRUE	Southern Asia	Southern Asia	TRUE
S183_T1	S002_T1	0.963597	S002_T1__S183_T1	FALSE	S183	S002	FALSE	Post-travel	Post-travel	TRUE	Southern Asia	Southern Asia	TRUE
S095_T0	S002_T1	0.578533	S002_T1__S095_T0	FALSE	S095	S002	FALSE	Pre-travel	Post-travel	FALSE	Northern Africa	Southern Asia	FALSE
S092_T0	S002_T1	0.950117	S002_T1__S092_T0	FALSE	S092	S002	FALSE	Pre-travel	Post-travel	FALSE	Northern Africa	Southern Asia	FALSE
S063_T1	S002_T1	0.778718	S002_T1__S063_T1	FALSE	S063	S002	FALSE	Post-travel	Post-travel	TRUE	Southeastern Asia	Southern Asia	FALSE
S026_T1	S002_T1	0.948926	S002_T1__S026_T1	FALSE	S026	S002	FALSE	Post-travel	Post-travel	TRUE	Southeastern Asia	Southern Asia	FALSE
S111_T0	S002_T1	0.478391	S002_T1__S111_T0	FALSE	S111	S002	FALSE	Pre-travel	Post-travel	FALSE	Northern Africa	Southern Asia	FALSE
S008_T0	S002_T1	0.527753	S002_T1__S008_T0	FALSE	S008	S002	FALSE	Pre-travel	Post-travel	FALSE	Northern Africa	Southern Asia	FALSE
S056_T1	S002_T1	0.746522	S002_T1__S056_T1	FALSE	S056	S002	FALSE	Post-travel	Post-travel	TRUE	Southern Asia	Southern Asia	TRUE
S070_T1	S002_T1	0.953399	S002_T1__S070_T1	FALSE	S070	S002	FALSE	Post-travel	Post-travel	TRUE	Southern Asia	Southern Asia	TRUE
S122_T0	S002_T1	0.915263	S002_T1__S122_T0	FALSE	S122	S002	FALSE	Pre-travel	Post-travel	FALSE	Southeastern Asia	Southern Asia	FALSE
S179_T1	S002_T1	0.891268	S002_T1__S179_T1	FALSE	S179	S002	FALSE	Post-travel	Post-travel	TRUE	Southeastern Asia	Southern Asia	FALSE
S035_T1	S002_T1	0.606882	S002_T1__S035_T1	FALSE	S035	S002	FALSE	Post-travel	Post-travel	TRUE	Eastern Africa	Southern Asia	FALSE
S159_T0	S002_T1	0.796801	S002_T1__S159_T0	FALSE	S159	S002	FALSE	Pre-travel	Post-travel	FALSE	Southern Asia	Southern Asia	TRUE
S179_T0	S002_T1	0.536468	S002_T1__S179_T0	FALSE	S179	S002	FALSE	Pre-travel	Post-travel	FALSE	Southeastern Asia	Southern Asia	FALSE
S117_T1	S002_T1	0.704742	S002_T1__S117_T1	FALSE	S117	S002	FALSE	Post-travel	Post-travel	TRUE	Southeastern Asia	Southern Asia	FALSE
S010_T1	S002_T1	0.76964	S002_T1__S010_T1	FALSE	S010	S002	FALSE	Post-travel	Post-travel	TRUE	Eastern Africa	Southern Asia	FALSE
S127_T1	S002_T1	0.865737	S002_T1__S127_T1	FALSE	S127	S002	FALSE	Post-travel	Post-travel	TRUE	Southeastern Asia	Southern Asia	FALSE
S018_T1	S002_T1	0.563626	S002_T1__S018_T1	FALSE	S018	S002	FALSE	Post-travel	Post-travel	TRUE	Eastern Africa	Southern Asia	FALSE
S181_T0	S002_T1	0.817771	S002_T1__S181_T0	FALSE	S181	S002	FALSE	Pre-travel	Post-travel	FALSE	Southern Asia	Southern Asia	TRUE
S031_T0	S002_T1	0.910615	S002_T1__S031_T0	FALSE	S031	S002	FALSE	Pre-travel	Post-travel	FALSE	Southern Asia	Southern Asia	TRUE
S176_T1	S002_T1	0.917794	S002_T1__S176_T1	FALSE	S176	S002	FALSE	Post-travel	Post-travel	TRUE	Northern Africa	Southern Asia	FALSE
S180_T1	S002_T1	0.575554	S002_T1__S180_T1	FALSE	S180	S002	FALSE	Post-travel	Post-travel	TRUE	Southern Asia	Southern Asia	TRUE
S155_T0	S002_T1	0.762962	S002_T1__S155_T0	FALSE	S155	S002	FALSE	Pre-travel	Post-travel	FALSE	Southern Asia	Southern Asia	TRUE
S084_T0	S002_T1	0.678188	S002_T1__S084_T0	FALSE	S084	S002	FALSE	Pre-travel	Post-travel	FALSE	Southeastern Asia	Southern Asia	FALSE
S161_T0	S002_T1	0.817687	S002_T1__S161_T0	FALSE	S161	S002	FALSE	Pre-travel	Post-travel	FALSE	Northern Africa	Southern Asia	FALSE
S182_T1	S002_T1	0.890109	S002_T1__S182_T1	FALSE	S182	S002	FALSE	Post-travel	Post-travel	TRUE	Northern Africa	Southern Asia	FALSE
S129_T0	S002_T1	0.797991	S002_T1__S129_T0	FALSE	S129	S002	FALSE	Pre-travel	Post-travel	FALSE	Eastern Africa	Southern Asia	FALSE
S139_T1	S002_T1	0.890539	S002_T1__S139_T1	FALSE	S139	S002	FALSE	Post-travel	Post-travel	TRUE	Southeastern Asia	Southern Asia	FALSE
S159_T1	S002_T1	0.899494	S002_T1__S159_T1	FALSE	S159	S002	FALSE	Post-travel	Post-travel	TRUE	Southern Asia	Southern Asia	TRUE
S067_T1	S002_T1	0.629157	S002_T1__S067_T1	FALSE	S067	S002	FALSE	Post-travel	Post-travel	TRUE	Eastern Africa	Southern Asia	FALSE
S014_T0	S002_T1	0.768771	S002_T1__S014_T0	FALSE	S014	S002	FALSE	Pre-travel	Post-travel	FALSE	Northern Africa	Southern Asia	FALSE
S077_T0	S002_T1	0.498686	S002_T1__S077_T0	FALSE	S077	S002	FALSE	Pre-travel	Post-travel	FALSE	Eastern Africa	Southern Asia	FALSE
S075_T0	S002_T1	0.928996	S002_T1__S075_T0	FALSE	S075	S002	FALSE	Pre-travel	Post-travel	FALSE	Northern Africa	Southern Asia	FALSE
S076_T1	S002_T1	0.720124	S002_T1__S076_T1	FALSE	S076	S002	FALSE	Post-travel	Post-travel	TRUE	Southeastern Asia	Southern Asia	FALSE
S074_T1	S002_T1	0.526694	S002_T1__S074_T1	FALSE	S074	S002	FALSE	Post-travel	Post-travel	TRUE	Northern Africa	Southern Asia	FALSE
S073_T0	S002_T1	0.613301	S002_T1__S073_T0	FALSE	S073	S002	FALSE	Pre-travel	Post-travel	FALSE	Eastern Africa	Southern Asia	FALSE
S059_T1	S002_T1	0.871985	S002_T1__S059_T1	FALSE	S059	S002	FALSE	Post-travel	Post-travel	TRUE	Southeastern Asia	Southern Asia	FALSE
S049_T1	S002_T1	0.749716	S002_T1__S049_T1	FALSE	S049	S002	FALSE	Post-travel	Post-travel	TRUE	Northern Africa	Southern Asia	FALSE
S147_T1	S002_T1	0.870888	S002_T1__S147_T1	FALSE	S147	S002	FALSE	Post-travel	Post-travel	TRUE	Southern Asia	Southern Asia	TRUE
S103_T0	S002_T1	0.521244	S002_T1__S103_T0	FALSE	S103	S002	FALSE	Pre-travel	Post-travel	FALSE	Northern Africa	Southern Asia	FALSE
S100_T0	S002_T1	0.954975	S002_T1__S100_T0	FALSE	S100	S002	FALSE	Pre-travel	Post-travel	FALSE	Southern Asia	Southern Asia	TRUE
S152_T0	S002_T1	0.797603	S002_T1__S152_T0	FALSE	S152	S002	FALSE	Pre-travel	Post-travel	FALSE	Eastern Africa	Southern Asia	FALSE
S140_T1	S002_T1	0.928547	S002_T1__S140_T1	FALSE	S140	S002	FALSE	Post-travel	Post-travel	TRUE	Southeastern Asia	Southern Asia	FALSE
S048_T1	S002_T1	0.946791	S002_T1__S048_T1	FALSE	S048	S002	FALSE	Post-travel	Post-travel	TRUE	Northern Africa	Southern Asia	FALSE
S056_T0	S002_T1	0.818664	S002_T1__S056_T0	FALSE	S056	S002	FALSE	Pre-travel	Post-travel	FALSE	Southern Asia	Southern Asia	TRUE
S121_T1	S002_T1	0.812427	S002_T1__S121_T1	FALSE	S121	S002	FALSE	Post-travel	Post-travel	TRUE	Eastern Africa	Southern Asia	FALSE
S028_T0	S002_T1	0.831514	S002_T1__S028_T0	FALSE	S028	S002	FALSE	Pre-travel	Post-travel	FALSE	Southeastern Asia	Southern Asia	FALSE
S108_T1	S002_T1	0.897953	S002_T1__S108_T1	FALSE	S108	S002	FALSE	Post-travel	Post-travel	TRUE	Southern Asia	Southern Asia	TRUE
S107_T0	S002_T1	0.52695	S002_T1__S107_T0	FALSE	S107	S002	FALSE	Pre-travel	Post-travel	FALSE	Southern Asia	Southern Asia	TRUE
S051_T0	S002_T1	0.55857	S002_T1__S051_T0	FALSE	S051	S002	FALSE	Pre-travel	Post-travel	FALSE	Southern Asia	Southern Asia	TRUE
S061_T0	S002_T1	0.530173	S002_T1__S061_T0	FALSE	S061	S002	FALSE	Pre-travel	Post-travel	FALSE	Southeastern Asia	Southern Asia	FALSE
S172_T1	S002_T1	0.962085	S002_T1__S172_T1	FALSE	S172	S002	FALSE	Post-travel	Post-travel	TRUE	Northern Africa	Southern Asia	FALSE
S045_T0	S002_T1	0.663569	S002_T1__S045_T0	FALSE	S045	S002	FALSE	Pre-travel	Post-travel	FALSE	Southern Asia	Southern Asia	TRUE
S044_T1	S002_T1	0.945785	S002_T1__S044_T1	FALSE	S044	S002	FALSE	Post-travel	Post-travel	TRUE	Southeastern Asia	Southern Asia	FALSE
S189_T0	S002_T1	0.463937	S002_T1__S189_T0	FALSE	S189	S002	FALSE	Pre-travel	Post-travel	FALSE	Northern Africa	Southern Asia	FALSE
S109_T1	S002_T1	0.777657	S002_T1__S109_T1	FALSE	S109	S002	FALSE	Post-travel	Post-travel	TRUE	Southern Asia	Southern Asia	TRUE
S166_T1	S002_T1	0.479525	S002_T1__S166_T1	FALSE	S166	S002	FALSE	Post-travel	Post-travel	TRUE	Southern Asia	Southern Asia	TRUE
S107_T1	S002_T1	0.51001	S002_T1__S107_T1	FALSE	S107	S002	FALSE	Post-travel	Post-travel	TRUE	Southern Asia	Southern Asia	TRUE
S067_T0	S002_T1	0.456221	S002_T1__S067_T0	FALSE	S067	S002	FALSE	Pre-travel	Post-travel	FALSE	Eastern Africa	Southern Asia	FALSE
S113_T0	S002_T1	0.621928	S002_T1__S113_T0	FALSE	S113	S002	FALSE	Pre-travel	Post-travel	FALSE	Eastern Africa	Southern Asia	FALSE
S057_T1	S002_T1	0.554612	S002_T1__S057_T1	FALSE	S057	S002	FALSE	Post-travel	Post-travel	TRUE	Southern Asia	Southern Asia	TRUE
S054_T0	S002_T1	0.71091	S002_T1__S054_T0	FALSE	S054	S002	FALSE	Pre-travel	Post-travel	FALSE	Northern Africa	Southern Asia	FALSE
S131_T0	S002_T1	0.82263	S002_T1__S131_T0	FALSE	S131	S002	FALSE	Pre-travel	Post-travel	FALSE	Northern Africa	Southern Asia	FALSE
S162_T0	S002_T1	0.839952	S002_T1__S162_T0	FALSE	S162	S002	FALSE	Pre-travel	Post-travel	FALSE	Northern Africa	Southern Asia	FALSE
S151_T1	S002_T1	0.824352	S002_T1__S151_T1	FALSE	S151	S002	FALSE	Post-travel	Post-travel	TRUE	Southern Asia	Southern Asia	TRUE
S101_T1	S002_T1	0.825084	S002_T1__S101_T1	FALSE	S101	S002	FALSE	Post-travel	Post-travel	TRUE	Southeastern Asia	Southern Asia	FALSE
S134_T0	S002_T1	0.552867	S002_T1__S134_T0	FALSE	S134	S002	FALSE	Pre-travel	Post-travel	FALSE	Southeastern Asia	Southern Asia	FALSE
S139_T0	S002_T1	0.458256	S002_T1__S139_T0	FALSE	S139	S002	FALSE	Pre-travel	Post-travel	FALSE	Southeastern Asia	Southern Asia	FALSE
S065_T0	S002_T1	0.770185	S002_T1__S065_T0	FALSE	S065	S002	FALSE	Pre-travel	Post-travel	FALSE	Eastern Africa	Southern Asia	FALSE
S062_T0	S002_T1	0.629751	S002_T1__S062_T0	FALSE	S062	S002	FALSE	Pre-travel	Post-travel	FALSE	Eastern Africa	Southern Asia	FALSE
S098_T1	S002_T1	0.979014	S002_T1__S098_T1	FALSE	S098	S002	FALSE	Post-travel	Post-travel	TRUE	Eastern Africa	Southern Asia	FALSE
S032_T0	S002_T1	0.913139	S002_T1__S032_T0	FALSE	S032	S002	FALSE	Pre-travel	Post-travel	FALSE	Southeastern Asia	Southern Asia	FALSE
S050_T1	S002_T1	0.684205	S002_T1__S050_T1	FALSE	S050	S002	FALSE	Post-travel	Post-travel	TRUE	Southern Asia	Southern Asia	TRUE
S093_T0	S002_T1	0.858036	S002_T1__S093_T0	FALSE	S093	S002	FALSE	Pre-travel	Post-travel	FALSE	Northern Africa	Southern Asia	FALSE
S046_T0	S002_T1	0.848459	S002_T1__S046_T0	FALSE	S046	S002	FALSE	Pre-travel	Post-travel	FALSE	Southern Asia	Southern Asia	TRUE
S156_T1	S002_T1	0.928775	S002_T1__S156_T1	FALSE	S156	S002	FALSE	Post-travel	Post-travel	TRUE	Southeastern Asia	Southern Asia	FALSE
S121_T0	S002_T1	0.688351	S002_T1__S121_T0	FALSE	S121	S002	FALSE	Pre-travel	Post-travel	FALSE	Eastern Africa	Southern Asia	FALSE
S004_T1	S002_T1	0.629661	S002_T1__S004_T1	FALSE	S004	S002	FALSE	Post-travel	Post-travel	TRUE	Southeastern Asia	Southern Asia	FALSE
S138_T0	S002_T1	0.833134	S002_T1__S138_T0	FALSE	S138	S002	FALSE	Pre-travel	Post-travel	FALSE	Southern Asia	Southern Asia	TRUE
S171_T1	S002_T1	0.925507	S002_T1__S171_T1	FALSE	S171	S002	FALSE	Post-travel	Post-travel	TRUE	Southeastern Asia	Southern Asia	FALSE
S023_T1	S002_T1	0.980223	S002_T1__S023_T1	FALSE	S023	S002	FALSE	Post-travel	Post-travel	TRUE	Southern Asia	Southern Asia	TRUE
S040_T0	S002_T1	0.830716	S002_T1__S040_T0	FALSE	S040	S002	FALSE	Pre-travel	Post-travel	FALSE	Northern Africa	Southern Asia	FALSE
S026_T0	S002_T1	0.823412	S002_T1__S026_T0	FALSE	S026	S002	FALSE	Pre-travel	Post-travel	FALSE	Southeastern Asia	Southern Asia	FALSE
S136_T1	S002_T1	0.523662	S002_T1__S136_T1	FALSE	S136	S002	FALSE	Post-travel	Post-travel	TRUE	Southern Asia	Southern Asia	TRUE
S141_T1	S002_T1	0.962765	S002_T1__S141_T1	FALSE	S141	S002	FALSE	Post-travel	Post-travel	TRUE	Eastern Africa	Southern Asia	FALSE
S112_T1	S002_T1	0.6076	S002_T1__S112_T1	FALSE	S112	S002	FALSE	Post-travel	Post-travel	TRUE	Northern Africa	Southern Asia	FALSE
S144_T1	S002_T1	0.868715	S002_T1__S144_T1	FALSE	S144	S002	FALSE	Post-travel	Post-travel	TRUE	Eastern Africa	Southern Asia	FALSE
S014_T1	S002_T1	0.907846	S002_T1__S014_T1	FALSE	S014	S002	FALSE	Post-travel	Post-travel	TRUE	Northern Africa	Southern Asia	FALSE
S039_T1	S002_T1	0.925855	S002_T1__S039_T1	FALSE	S039	S002	FALSE	Post-travel	Post-travel	TRUE	Northern Africa	Southern Asia	FALSE
S025_T1	S002_T1	0.895915	S002_T1__S025_T1	FALSE	S025	S002	FALSE	Post-travel	Post-travel	TRUE	Southern Asia	Southern Asia	TRUE
S052_T0	S002_T1	0.757134	S002_T1__S052_T0	FALSE	S052	S002	FALSE	Pre-travel	Post-travel	FALSE	Southeastern Asia	Southern Asia	FALSE
S017_T1	S002_T1	0.950058	S002_T1__S017_T1	FALSE	S017	S002	FALSE	Post-travel	Post-travel	TRUE	Southern Asia	Southern Asia	TRUE
S116_T0	S002_T1	0.483512	S002_T1__S116_T0	FALSE	S116	S002	FALSE	Pre-travel	Post-travel	FALSE	Southeastern Asia	Southern Asia	FALSE
S036_T0	S002_T1	0.952201	S002_T1__S036_T0	FALSE	S036	S002	FALSE	Pre-travel	Post-travel	FALSE	Southeastern Asia	Southern Asia	FALSE
S167_T1	S002_T1	0.510235	S002_T1__S167_T1	FALSE	S167	S002	FALSE	Post-travel	Post-travel	TRUE	Eastern Africa	Southern Asia	FALSE
S066_T0	S002_T1	0.47494	S002_T1__S066_T0	FALSE	S066	S002	FALSE	Pre-travel	Post-travel	FALSE	Eastern Africa	Southern Asia	FALSE
S032_T1	S002_T1	0.905525	S002_T1__S032_T1	FALSE	S032	S002	FALSE	Post-travel	Post-travel	TRUE	Southeastern Asia	Southern Asia	FALSE
S105_T1	S002_T1	0.793661	S002_T1__S105_T1	FALSE	S105	S002	FALSE	Post-travel	Post-travel	TRUE	Eastern Africa	Southern Asia	FALSE
S083_T1	S002_T1	0.446457	S002_T1__S083_T1	FALSE	S083	S002	FALSE	Post-travel	Post-travel	TRUE	Northern Africa	Southern Asia	FALSE
S146_T0	S002_T1	0.832911	S002_T1__S146_T0	FALSE	S146	S002	FALSE	Pre-travel	Post-travel	FALSE	Northern Africa	Southern Asia	FALSE
S108_T0	S002_T1	0.85301	S002_T1__S108_T0	FALSE	S108	S002	FALSE	Pre-travel	Post-travel	FALSE	Southern Asia	Southern Asia	TRUE
S016_T0	S002_T1	0.53222	S002_T1__S016_T0	FALSE	S016	S002	FALSE	Pre-travel	Post-travel	FALSE	Northern Africa	Southern Asia	FALSE
S129_T1	S002_T1	0.817397	S002_T1__S129_T1	FALSE	S129	S002	FALSE	Post-travel	Post-travel	TRUE	Eastern Africa	Southern Asia	FALSE
S146_T1	S002_T1	0.836791	S002_T1__S146_T1	FALSE	S146	S002	FALSE	Post-travel	Post-travel	TRUE	Northern Africa	Southern Asia	FALSE
S163_T0	S002_T1	0.672841	S002_T1__S163_T0	FALSE	S163	S002	FALSE	Pre-travel	Post-travel	FALSE	Northern Africa	Southern Asia	FALSE
S033_T0	S002_T1	0.511656	S002_T1__S033_T0	FALSE	S033	S002	FALSE	Pre-travel	Post-travel	FALSE	Southern Asia	Southern Asia	TRUE
S078_T0	S002_T1	0.487577	S002_T1__S078_T0	FALSE	S078	S002	FALSE	Pre-travel	Post-travel	FALSE	Eastern Africa	Southern Asia	FALSE
S029_T1	S002_T1	0.835292	S002_T1__S029_T1	FALSE	S029	S002	FALSE	Post-travel	Post-travel	TRUE	Eastern Africa	Southern Asia	FALSE
S123_T1	S002_T1	0.583797	S002_T1__S123_T1	FALSE	S123	S002	FALSE	Post-travel	Post-travel	TRUE	Eastern Africa	Southern Asia	FALSE
S080_T1	S002_T1	0.645252	S002_T1__S080_T1	FALSE	S080	S002	FALSE	Post-travel	Post-travel	TRUE	Southeastern Asia	Southern Asia	FALSE
S134_T1	S002_T1	0.566268	S002_T1__S134_T1	FALSE	S134	S002	FALSE	Post-travel	Post-travel	TRUE	Southeastern Asia	Southern Asia	FALSE
S072_T0	S002_T1	0.322475	S002_T1__S072_T0	FALSE	S072	S002	FALSE	Pre-travel	Post-travel	FALSE	Eastern Africa	Southern Asia	FALSE
S168_T1	S002_T1	0.706318	S002_T1__S168_T1	FALSE	S168	S002	FALSE	Post-travel	Post-travel	TRUE	Southern Asia	Southern Asia	TRUE
S013_T1	S002_T1	0.59215	S002_T1__S013_T1	FALSE	S013	S002	FALSE	Post-travel	Post-travel	TRUE	Eastern Africa	Southern Asia	FALSE
S058_T0	S002_T1	0.583532	S002_T1__S058_T0	FALSE	S058	S002	FALSE	Pre-travel	Post-travel	FALSE	Southern Asia	Southern Asia	TRUE
S044_T0	S002_T1	0.906661	S002_T1__S044_T0	FALSE	S044	S002	FALSE	Pre-travel	Post-travel	FALSE	Southeastern Asia	Southern Asia	FALSE
S039_T0	S002_T1	0.422346	S002_T1__S039_T0	FALSE	S039	S002	FALSE	Pre-travel	Post-travel	FALSE	Northern Africa	Southern Asia	FALSE
S081_T0	S002_T1	0.595995	S002_T1__S081_T0	FALSE	S081	S002	FALSE	Pre-travel	Post-travel	FALSE	Southeastern Asia	Southern Asia	FALSE
S012_T1	S002_T1	0.924721	S002_T1__S012_T1	FALSE	S012	S002	FALSE	Post-travel	Post-travel	TRUE	Eastern Africa	Southern Asia	FALSE
S085_T1	S002_T1	0.687165	S002_T1__S085_T1	FALSE	S085	S002	FALSE	Post-travel	Post-travel	TRUE	Southern Asia	Southern Asia	TRUE
S189_T1	S002_T1	0.524614	S002_T1__S189_T1	FALSE	S189	S002	FALSE	Post-travel	Post-travel	TRUE	Northern Africa	Southern Asia	FALSE
S110_T1	S002_T1	0.951665	S002_T1__S110_T1	FALSE	S110	S002	FALSE	Post-travel	Post-travel	TRUE	Southeastern Asia	Southern Asia	FALSE
S140_T0	S002_T1	0.564461	S002_T1__S140_T0	FALSE	S140	S002	FALSE	Pre-travel	Post-travel	FALSE	Southeastern Asia	Southern Asia	FALSE
S126_T1	S002_T1	0.694064	S002_T1__S126_T1	FALSE	S126	S002	FALSE	Post-travel	Post-travel	TRUE	Southeastern Asia	Southern Asia	FALSE
S127_T0	S002_T1	0.658636	S002_T1__S127_T0	FALSE	S127	S002	FALSE	Pre-travel	Post-travel	FALSE	Southeastern Asia	Southern Asia	FALSE
S164_T0	S002_T1	0.416911	S002_T1__S164_T0	FALSE	S164	S002	FALSE	Pre-travel	Post-travel	FALSE	Southeastern Asia	Southern Asia	FALSE
S137_T0	S002_T1	0.976498	S002_T1__S137_T0	FALSE	S137	S002	FALSE	Pre-travel	Post-travel	FALSE	Southern Asia	Southern Asia	TRUE
S144_T0	S002_T1	0.933744	S002_T1__S144_T0	FALSE	S144	S002	FALSE	Pre-travel	Post-travel	FALSE	Eastern Africa	Southern Asia	FALSE
S076_T0	S002_T1	0.415423	S002_T1__S076_T0	FALSE	S076	S002	FALSE	Pre-travel	Post-travel	FALSE	Southeastern Asia	Southern Asia	FALSE
S054_T1	S002_T1	0.779634	S002_T1__S054_T1	FALSE	S054	S002	FALSE	Post-travel	Post-travel	TRUE	Northern Africa	Southern Asia	FALSE
S041_T1	S002_T1	0.931356	S002_T1__S041_T1	FALSE	S041	S002	FALSE	Post-travel	Post-travel	TRUE	Southern Asia	Southern Asia	TRUE
S047_T1	S002_T1	0.922597	S002_T1__S047_T1	FALSE	S047	S002	FALSE	Post-travel	Post-travel	TRUE	Southern Asia	Southern Asia	TRUE
S177_T1	S002_T1	0.962556	S002_T1__S177_T1	FALSE	S177	S002	FALSE	Post-travel	Post-travel	TRUE	Southeastern Asia	Southern Asia	FALSE
S175_T0	S002_T1	0.578636	S002_T1__S175_T0	FALSE	S175	S002	FALSE	Pre-travel	Post-travel	FALSE	Northern Africa	Southern Asia	FALSE
S042_T1	S002_T1	0.954301	S002_T1__S042_T1	FALSE	S042	S002	FALSE	Post-travel	Post-travel	TRUE	Eastern Africa	Southern Asia	FALSE
S071_T0	S002_T1	0.516044	S002_T1__S071_T0	FALSE	S071	S002	FALSE	Pre-travel	Post-travel	FALSE	Southeastern Asia	Southern Asia	FALSE
S020_T1	S002_T1	0.976566	S002_T1__S020_T1	FALSE	S020	S002	FALSE	Post-travel	Post-travel	TRUE	Southeastern Asia	Southern Asia	FALSE
S190_T0	S002_T1	0.754653	S002_T1__S190_T0	FALSE	S190	S002	FALSE	Pre-travel	Post-travel	FALSE	Eastern Africa	Southern Asia	FALSE
S087_T0	S002_T1	0.882016	S002_T1__S087_T0	FALSE	S087	S002	FALSE	Pre-travel	Post-travel	FALSE	Eastern Africa	Southern Asia	FALSE
S114_T1	S002_T1	0.937121	S002_T1__S114_T1	FALSE	S114	S002	FALSE	Post-travel	Post-travel	TRUE	Eastern Africa	Southern Asia	FALSE
S088_T1	S002_T1	0.993032	S002_T1__S088_T1	FALSE	S088	S002	FALSE	Post-travel	Post-travel	TRUE	Eastern Africa	Southern Asia	FALSE
S055_T0	S002_T1	0.860419	S002_T1__S055_T0	FALSE	S055	S002	FALSE	Pre-travel	Post-travel	FALSE	Eastern Africa	Southern Asia	FALSE
S119_T0	S002_T1	0.835036	S002_T1__S119_T0	FALSE	S119	S002	FALSE	Pre-travel	Post-travel	FALSE	Southeastern Asia	Southern Asia	FALSE
S185_T1	S002_T1	0.83934	S002_T1__S185_T1	FALSE	S185	S002	FALSE	Post-travel	Post-travel	TRUE	Southeastern Asia	Southern Asia	FALSE
S113_T1	S002_T1	0.706483	S002_T1__S113_T1	FALSE	S113	S002	FALSE	Post-travel	Post-travel	TRUE	Eastern Africa	Southern Asia	FALSE
S093_T1	S002_T1	0.752171	S002_T1__S093_T1	FALSE	S093	S002	FALSE	Post-travel	Post-travel	TRUE	Northern Africa	Southern Asia	FALSE
S118_T0	S002_T1	0.872487	S002_T1__S118_T0	FALSE	S118	S002	FALSE	Pre-travel	Post-travel	FALSE	Southern Asia	Southern Asia	TRUE
S069_T1	S002_T1	0.499708	S002_T1__S069_T1	FALSE	S069	S002	FALSE	Post-travel	Post-travel	TRUE	Southern Asia	Southern Asia	TRUE
S141_T0	S002_T1	0.665219	S002_T1__S141_T0	FALSE	S141	S002	FALSE	Pre-travel	Post-travel	FALSE	Eastern Africa	Southern Asia	FALSE
S133_T1	S002_T1	0.886072	S002_T1__S133_T1	FALSE	S133	S002	FALSE	Post-travel	Post-travel	TRUE	Southeastern Asia	Southern Asia	FALSE
S091_T1	S002_T1	0.537745	S002_T1__S091_T1	FALSE	S091	S002	FALSE	Post-travel	Post-travel	TRUE	Eastern Africa	Southern Asia	FALSE
S166_T0	S002_T1	0.56871	S002_T1__S166_T0	FALSE	S166	S002	FALSE	Pre-travel	Post-travel	FALSE	Southern Asia	Southern Asia	TRUE
S103_T1	S002_T1	0.990802	S002_T1__S103_T1	FALSE	S103	S002	FALSE	Post-travel	Post-travel	TRUE	Northern Africa	Southern Asia	FALSE
S165_T1	S002_T1	0.702129	S002_T1__S165_T1	FALSE	S165	S002	FALSE	Post-travel	Post-travel	TRUE	Southern Asia	Southern Asia	TRUE
S161_T1	S002_T1	0.841839	S002_T1__S161_T1	FALSE	S161	S002	FALSE	Post-travel	Post-travel	TRUE	Northern Africa	Southern Asia	FALSE
S088_T0	S002_T1	0.976635	S002_T1__S088_T0	FALSE	S088	S002	FALSE	Pre-travel	Post-travel	FALSE	Eastern Africa	Southern Asia	FALSE
S187_T0	S002_T1	0.902834	S002_T1__S187_T0	FALSE	S187	S002	FALSE	Pre-travel	Post-travel	FALSE	Eastern Africa	Southern Asia	FALSE
S153_T0	S002_T1	0.941916	S002_T1__S153_T0	FALSE	S153	S002	FALSE	Pre-travel	Post-travel	FALSE	Eastern Africa	Southern Asia	FALSE
S015_T1	S002_T1	0.901999	S002_T1__S015_T1	FALSE	S015	S002	FALSE	Post-travel	Post-travel	TRUE	Southern Asia	Southern Asia	TRUE
S186_T1	S002_T1	0.854832	S002_T1__S186_T1	FALSE	S186	S002	FALSE	Post-travel	Post-travel	TRUE	Southern Asia	Southern Asia	TRUE
S096_T0	S002_T1	0.911983	S002_T1__S096_T0	FALSE	S096	S002	FALSE	Pre-travel	Post-travel	FALSE	Eastern Africa	Southern Asia	FALSE
S160_T1	S002_T1	0.867842	S002_T1__S160_T1	FALSE	S160	S002	FALSE	Post-travel	Post-travel	TRUE	Southeastern Asia	Southern Asia	FALSE
S012_T0	S002_T1	0.941193	S002_T1__S012_T0	FALSE	S012	S002	FALSE	Pre-travel	Post-travel	FALSE	Eastern Africa	Southern Asia	FALSE
S158_T0	S002_T1	0.541821	S002_T1__S158_T0	FALSE	S158	S002	FALSE	Pre-travel	Post-travel	FALSE	Southern Asia	Southern Asia	TRUE
S090_T0	S002_T1	0.964326	S002_T1__S090_T0	FALSE	S090	S002	FALSE	Pre-travel	Post-travel	FALSE	Eastern Africa	Southern Asia	FALSE
S173_T0	S002_T1	0.868188	S002_T1__S173_T0	FALSE	S173	S002	FALSE	Pre-travel	Post-travel	FALSE	Southeastern Asia	Southern Asia	FALSE
S082_T0	S002_T1	0.499792	S002_T1__S082_T0	FALSE	S082	S002	FALSE	Pre-travel	Post-travel	FALSE	Northern Africa	Southern Asia	FALSE
S023_T0	S002_T1	0.861225	S002_T1__S023_T0	FALSE	S023	S002	FALSE	Pre-travel	Post-travel	FALSE	Southern Asia	Southern Asia	TRUE
S186_T0	S002_T1	0.831242	S002_T1__S186_T0	FALSE	S186	S002	FALSE	Pre-travel	Post-travel	FALSE	Southern Asia	Southern Asia	TRUE
S180_T0	S002_T1	0.536098	S002_T1__S180_T0	FALSE	S180	S002	FALSE	Pre-travel	Post-travel	FALSE	Southern Asia	Southern Asia	TRUE
S162_T1	S002_T1	0.550936	S002_T1__S162_T1	FALSE	S162	S002	FALSE	Post-travel	Post-travel	TRUE	Northern Africa	Southern Asia	FALSE
S049_T0	S002_T1	0.882533	S002_T1__S049_T0	FALSE	S049	S002	FALSE	Pre-travel	Post-travel	FALSE	Northern Africa	Southern Asia	FALSE
S123_T0	S002_T1	0.716274	S002_T1__S123_T0	FALSE	S123	S002	FALSE	Pre-travel	Post-travel	FALSE	Eastern Africa	Southern Asia	FALSE
S086_T1	S002_T1	0.638462	S002_T1__S086_T1	FALSE	S086	S002	FALSE	Post-travel	Post-travel	TRUE	Northern Africa	Southern Asia	FALSE
S164_T1	S002_T1	0.541938	S002_T1__S164_T1	FALSE	S164	S002	FALSE	Post-travel	Post-travel	TRUE	Southeastern Asia	Southern Asia	FALSE
S132_T0	S002_T1	0.42956	S002_T1__S132_T0	FALSE	S132	S002	FALSE	Pre-travel	Post-travel	FALSE	Northern Africa	Southern Asia	FALSE
S132_T1	S002_T1	0.531328	S002_T1__S132_T1	FALSE	S132	S002	FALSE	Post-travel	Post-travel	TRUE	Northern Africa	Southern Asia	FALSE
S177_T0	S002_T1	0.901771	S002_T1__S177_T0	FALSE	S177	S002	FALSE	Pre-travel	Post-travel	FALSE	Southeastern Asia	Southern Asia	FALSE
S089_T1	S002_T1	0.897384	S002_T1__S089_T1	FALSE	S089	S002	FALSE	Post-travel	Post-travel	TRUE	Eastern Africa	Southern Asia	FALSE
S061_T1	S002_T1	0.993511	S002_T1__S061_T1	FALSE	S061	S002	FALSE	Post-travel	Post-travel	TRUE	Southeastern Asia	Southern Asia	FALSE
S128_T0	S002_T1	0.938374	S002_T1__S128_T0	FALSE	S128	S002	FALSE	Pre-travel	Post-travel	FALSE	Northern Africa	Southern Asia	FALSE
S176_T0	S002_T1	0.884366	S002_T1__S176_T0	FALSE	S176	S002	FALSE	Pre-travel	Post-travel	FALSE	Northern Africa	Southern Asia	FALSE
S145_T0	S002_T1	0.706725	S002_T1__S145_T0	FALSE	S145	S002	FALSE	Pre-travel	Post-travel	FALSE	Northern Africa	Southern Asia	FALSE
S046_T1	S002_T1	0.761938	S002_T1__S046_T1	FALSE	S046	S002	FALSE	Post-travel	Post-travel	TRUE	Southern Asia	Southern Asia	TRUE
S096_T1	S002_T1	0.632769	S002_T1__S096_T1	FALSE	S096	S002	FALSE	Post-travel	Post-travel	TRUE	Eastern Africa	Southern Asia	FALSE
S138_T1	S002_T1	0.875278	S002_T1__S138_T1	FALSE	S138	S002	FALSE	Post-travel	Post-travel	TRUE	Southern Asia	Southern Asia	TRUE
S169_T0	S002_T1	0.927951	S002_T1__S169_T0	FALSE	S169	S002	FALSE	Pre-travel	Post-travel	FALSE	Southern Asia	Southern Asia	TRUE
S118_T1	S002_T1	0.854285	S002_T1__S118_T1	FALSE	S118	S002	FALSE	Post-travel	Post-travel	TRUE	Southern Asia	Southern Asia	TRUE
S020_T0	S002_T1	0.837372	S002_T1__S020_T0	FALSE	S020	S002	FALSE	Pre-travel	Post-travel	FALSE	Southeastern Asia	Southern Asia	FALSE
S119_T1	S002_T1	0.88285	S002_T1__S119_T1	FALSE	S119	S002	FALSE	Post-travel	Post-travel	TRUE	Southeastern Asia	Southern Asia	FALSE
S136_T0	S002_T1	0.789511	S002_T1__S136_T0	FALSE	S136	S002	FALSE	Pre-travel	Post-travel	FALSE	Southern Asia	Southern Asia	TRUE
S030_T0	S002_T1	0.936952	S002_T1__S030_T0	FALSE	S030	S002	FALSE	Pre-travel	Post-travel	FALSE	Southeastern Asia	Southern Asia	FALSE
S054_T1	S003_T0	0.699372	S003_T0__S054_T1	FALSE	S054	S003	FALSE	Post-travel	Pre-travel	FALSE	Northern Africa	Southeastern Asia	FALSE
S136_T0	S003_T0	0.809572	S003_T0__S136_T0	FALSE	S136	S003	FALSE	Pre-travel	Pre-travel	TRUE	Southern Asia	Southeastern Asia	FALSE
S154_T1	S003_T0	0.647086	S003_T0__S154_T1	FALSE	S154	S003	FALSE	Post-travel	Pre-travel	FALSE	Southern Asia	Southeastern Asia	FALSE
S100_T1	S003_T0	0.949896	S003_T0__S100_T1	FALSE	S100	S003	FALSE	Post-travel	Pre-travel	FALSE	Southern Asia	Southeastern Asia	FALSE
S135_T0	S003_T0	0.768384	S003_T0__S135_T0	FALSE	S135	S003	FALSE	Pre-travel	Pre-travel	TRUE	Southern Asia	Southeastern Asia	FALSE
S091_T0	S003_T0	0.808378	S003_T0__S091_T0	FALSE	S091	S003	FALSE	Pre-travel	Pre-travel	TRUE	Eastern Africa	Southeastern Asia	FALSE
S092_T0	S003_T0	0.941584	S003_T0__S092_T0	FALSE	S092	S003	FALSE	Pre-travel	Pre-travel	TRUE	Northern Africa	Southeastern Asia	FALSE
S150_T1	S003_T0	0.939607	S003_T0__S150_T1	FALSE	S150	S003	FALSE	Post-travel	Pre-travel	FALSE	Northern Africa	Southeastern Asia	FALSE
S182_T1	S003_T0	0.890704	S003_T0__S182_T1	FALSE	S182	S003	FALSE	Post-travel	Pre-travel	FALSE	Northern Africa	Southeastern Asia	FALSE
S115_T0	S003_T0	0.453652	S003_T0__S115_T0	FALSE	S115	S003	FALSE	Pre-travel	Pre-travel	TRUE	Southeastern Asia	Southeastern Asia	TRUE
S016_T1	S003_T0	0.783406	S003_T0__S016_T1	FALSE	S016	S003	FALSE	Post-travel	Pre-travel	FALSE	Northern Africa	Southeastern Asia	FALSE
S064_T1	S003_T0	0.631968	S003_T0__S064_T1	FALSE	S064	S003	FALSE	Post-travel	Pre-travel	FALSE	Southeastern Asia	Southeastern Asia	TRUE
S075_T1	S003_T0	0.632113	S003_T0__S075_T1	FALSE	S075	S003	FALSE	Post-travel	Pre-travel	FALSE	Northern Africa	Southeastern Asia	FALSE
S063_T0	S003_T0	0.975677	S003_T0__S063_T0	FALSE	S063	S003	FALSE	Pre-travel	Pre-travel	TRUE	Southeastern Asia	Southeastern Asia	TRUE
S012_T1	S003_T0	0.916419	S003_T0__S012_T1	FALSE	S012	S003	FALSE	Post-travel	Pre-travel	FALSE	Eastern Africa	Southeastern Asia	FALSE
S150_T0	S003_T0	0.967829	S003_T0__S150_T0	FALSE	S150	S003	FALSE	Pre-travel	Pre-travel	TRUE	Northern Africa	Southeastern Asia	FALSE
S042_T0	S003_T0	0.828038	S003_T0__S042_T0	FALSE	S042	S003	FALSE	Pre-travel	Pre-travel	TRUE	Eastern Africa	Southeastern Asia	FALSE
S039_T1	S003_T0	0.908652	S003_T0__S039_T1	FALSE	S039	S003	FALSE	Post-travel	Pre-travel	FALSE	Northern Africa	Southeastern Asia	FALSE
S063_T1	S003_T0	0.757109	S003_T0__S063_T1	FALSE	S063	S003	FALSE	Post-travel	Pre-travel	FALSE	Southeastern Asia	Southeastern Asia	TRUE
S104_T1	S003_T0	0.862168	S003_T0__S104_T1	FALSE	S104	S003	FALSE	Post-travel	Pre-travel	FALSE	Northern Africa	Southeastern Asia	FALSE
S035_T0	S003_T0	0.627586	S003_T0__S035_T0	FALSE	S035	S003	FALSE	Pre-travel	Pre-travel	TRUE	Eastern Africa	Southeastern Asia	FALSE
S187_T1	S003_T0	0.832995	S003_T0__S187_T1	FALSE	S187	S003	FALSE	Post-travel	Pre-travel	FALSE	Eastern Africa	Southeastern Asia	FALSE
S140_T1	S003_T0	0.920181	S003_T0__S140_T1	FALSE	S140	S003	FALSE	Post-travel	Pre-travel	FALSE	Southeastern Asia	Southeastern Asia	TRUE
S081_T0	S003_T0	0.502979	S003_T0__S081_T0	FALSE	S081	S003	FALSE	Pre-travel	Pre-travel	TRUE	Southeastern Asia	Southeastern Asia	TRUE
S180_T1	S003_T0	0.428646	S003_T0__S180_T1	FALSE	S180	S003	FALSE	Post-travel	Pre-travel	FALSE	Southern Asia	Southeastern Asia	FALSE
S103_T0	S003_T0	0.491473	S003_T0__S103_T0	FALSE	S103	S003	FALSE	Pre-travel	Pre-travel	TRUE	Northern Africa	Southeastern Asia	FALSE
S137_T1	S003_T0	0.896347	S003_T0__S137_T1	FALSE	S137	S003	FALSE	Post-travel	Pre-travel	FALSE	Southern Asia	Southeastern Asia	FALSE
S146_T0	S003_T0	0.805389	S003_T0__S146_T0	FALSE	S146	S003	FALSE	Pre-travel	Pre-travel	TRUE	Northern Africa	Southeastern Asia	FALSE
S008_T0	S003_T0	0.598842	S003_T0__S008_T0	FALSE	S008	S003	FALSE	Pre-travel	Pre-travel	TRUE	Northern Africa	Southeastern Asia	FALSE
S004_T0	S003_T0	0.456932	S003_T0__S004_T0	FALSE	S004	S003	FALSE	Pre-travel	Pre-travel	TRUE	Southeastern Asia	Southeastern Asia	TRUE
S028_T0	S003_T0	0.793861	S003_T0__S028_T0	FALSE	S028	S003	FALSE	Pre-travel	Pre-travel	TRUE	Southeastern Asia	Southeastern Asia	TRUE
S190_T0	S003_T0	0.695015	S003_T0__S190_T0	FALSE	S190	S003	FALSE	Pre-travel	Pre-travel	TRUE	Eastern Africa	Southeastern Asia	FALSE
S109_T0	S003_T0	0.804441	S003_T0__S109_T0	FALSE	S109	S003	FALSE	Pre-travel	Pre-travel	TRUE	Southern Asia	Southeastern Asia	FALSE
S172_T1	S003_T0	0.946779	S003_T0__S172_T1	FALSE	S172	S003	FALSE	Post-travel	Pre-travel	FALSE	Northern Africa	Southeastern Asia	FALSE
S134_T0	S003_T0	0.601783	S003_T0__S134_T0	FALSE	S134	S003	FALSE	Pre-travel	Pre-travel	TRUE	Southeastern Asia	Southeastern Asia	TRUE
S043_T1	S003_T0	0.780425	S003_T0__S043_T1	FALSE	S043	S003	FALSE	Post-travel	Pre-travel	FALSE	Southeastern Asia	Southeastern Asia	TRUE
S112_T1	S003_T0	0.655325	S003_T0__S112_T1	FALSE	S112	S003	FALSE	Post-travel	Pre-travel	FALSE	Northern Africa	Southeastern Asia	FALSE
S155_T0	S003_T0	0.726182	S003_T0__S155_T0	FALSE	S155	S003	FALSE	Pre-travel	Pre-travel	TRUE	Southern Asia	Southeastern Asia	FALSE
S168_T0	S003_T0	0.861068	S003_T0__S168_T0	FALSE	S168	S003	FALSE	Pre-travel	Pre-travel	TRUE	Southern Asia	Southeastern Asia	FALSE
S068_T0	S003_T0	0.872094	S003_T0__S068_T0	FALSE	S068	S003	FALSE	Pre-travel	Pre-travel	TRUE	Eastern Africa	Southeastern Asia	FALSE
S010_T1	S003_T0	0.746239	S003_T0__S010_T1	FALSE	S010	S003	FALSE	Post-travel	Pre-travel	FALSE	Eastern Africa	Southeastern Asia	FALSE
S048_T1	S003_T0	0.935765	S003_T0__S048_T1	FALSE	S048	S003	FALSE	Post-travel	Pre-travel	FALSE	Northern Africa	Southeastern Asia	FALSE
S118_T1	S003_T0	0.806265	S003_T0__S118_T1	FALSE	S118	S003	FALSE	Post-travel	Pre-travel	FALSE	Southern Asia	Southeastern Asia	FALSE
S047_T1	S003_T0	0.914598	S003_T0__S047_T1	FALSE	S047	S003	FALSE	Post-travel	Pre-travel	FALSE	Southern Asia	Southeastern Asia	FALSE
S058_T0	S003_T0	0.660888	S003_T0__S058_T0	FALSE	S058	S003	FALSE	Pre-travel	Pre-travel	TRUE	Southern Asia	Southeastern Asia	FALSE
S009_T0	S003_T0	0.582878	S003_T0__S009_T0	FALSE	S009	S003	FALSE	Pre-travel	Pre-travel	TRUE	Northern Africa	Southeastern Asia	FALSE
S052_T1	S003_T0	0.79924	S003_T0__S052_T1	FALSE	S052	S003	FALSE	Post-travel	Pre-travel	FALSE	Southeastern Asia	Southeastern Asia	TRUE
S123_T0	S003_T0	0.685388	S003_T0__S123_T0	FALSE	S123	S003	FALSE	Pre-travel	Pre-travel	TRUE	Eastern Africa	Southeastern Asia	FALSE
S107_T0	S003_T0	0.561094	S003_T0__S107_T0	FALSE	S107	S003	FALSE	Pre-travel	Pre-travel	TRUE	Southern Asia	Southeastern Asia	FALSE
S143_T0	S003_T0	0.954227	S003_T0__S143_T0	FALSE	S143	S003	FALSE	Pre-travel	Pre-travel	TRUE	Eastern Africa	Southeastern Asia	FALSE
S027_T0	S003_T0	0.383875	S003_T0__S027_T0	FALSE	S027	S003	FALSE	Pre-travel	Pre-travel	TRUE	Eastern Africa	Southeastern Asia	FALSE
S017_T0	S003_T0	0.83464	S003_T0__S017_T0	FALSE	S017	S003	FALSE	Pre-travel	Pre-travel	TRUE	Southern Asia	Southeastern Asia	FALSE
S025_T1	S003_T0	0.87716	S003_T0__S025_T1	FALSE	S025	S003	FALSE	Post-travel	Pre-travel	FALSE	Southern Asia	Southeastern Asia	FALSE
S087_T1	S003_T0	0.786244	S003_T0__S087_T1	FALSE	S087	S003	FALSE	Post-travel	Pre-travel	FALSE	Eastern Africa	Southeastern Asia	FALSE
S008_T1	S003_T0	0.60556	S003_T0__S008_T1	FALSE	S008	S003	FALSE	Post-travel	Pre-travel	FALSE	Northern Africa	Southeastern Asia	FALSE
S103_T1	S003_T0	0.978933	S003_T0__S103_T1	FALSE	S103	S003	FALSE	Post-travel	Pre-travel	FALSE	Northern Africa	Southeastern Asia	FALSE
S024_T0	S003_T0	0.680572	S003_T0__S024_T0	FALSE	S024	S003	FALSE	Pre-travel	Pre-travel	TRUE	Southern Asia	Southeastern Asia	FALSE
S108_T0	S003_T0	0.844035	S003_T0__S108_T0	FALSE	S108	S003	FALSE	Pre-travel	Pre-travel	TRUE	Southern Asia	Southeastern Asia	FALSE
S160_T0	S003_T0	0.857094	S003_T0__S160_T0	FALSE	S160	S003	FALSE	Pre-travel	Pre-travel	TRUE	Southeastern Asia	Southeastern Asia	TRUE
S046_T0	S003_T0	0.83816	S003_T0__S046_T0	FALSE	S046	S003	FALSE	Pre-travel	Pre-travel	TRUE	Southern Asia	Southeastern Asia	FALSE
S155_T1	S003_T0	0.902396	S003_T0__S155_T1	FALSE	S155	S003	FALSE	Post-travel	Pre-travel	FALSE	Southern Asia	Southeastern Asia	FALSE
S156_T1	S003_T0	0.917627	S003_T0__S156_T1	FALSE	S156	S003	FALSE	Post-travel	Pre-travel	FALSE	Southeastern Asia	Southeastern Asia	TRUE
S125_T1	S003_T0	0.73383	S003_T0__S125_T1	FALSE	S125	S003	FALSE	Post-travel	Pre-travel	FALSE	Southern Asia	Southeastern Asia	FALSE
S117_T0	S003_T0	0.914935	S003_T0__S117_T0	FALSE	S117	S003	FALSE	Pre-travel	Pre-travel	TRUE	Southeastern Asia	Southeastern Asia	TRUE
S132_T1	S003_T0	0.464368	S003_T0__S132_T1	FALSE	S132	S003	FALSE	Post-travel	Pre-travel	FALSE	Northern Africa	Southeastern Asia	FALSE
S069_T1	S003_T0	0.581166	S003_T0__S069_T1	FALSE	S069	S003	FALSE	Post-travel	Pre-travel	FALSE	Southern Asia	Southeastern Asia	FALSE
S090_T0	S003_T0	0.944996	S003_T0__S090_T0	FALSE	S090	S003	FALSE	Pre-travel	Pre-travel	TRUE	Eastern Africa	Southeastern Asia	FALSE
S176_T1	S003_T0	0.904375	S003_T0__S176_T1	FALSE	S176	S003	FALSE	Post-travel	Pre-travel	FALSE	Northern Africa	Southeastern Asia	FALSE
S070_T1	S003_T0	0.949672	S003_T0__S070_T1	FALSE	S070	S003	FALSE	Post-travel	Pre-travel	FALSE	Southern Asia	Southeastern Asia	FALSE
S187_T0	S003_T0	0.889536	S003_T0__S187_T0	FALSE	S187	S003	FALSE	Pre-travel	Pre-travel	TRUE	Eastern Africa	Southeastern Asia	FALSE
S028_T1	S003_T0	0.831613	S003_T0__S028_T1	FALSE	S028	S003	FALSE	Post-travel	Pre-travel	FALSE	Southeastern Asia	Southeastern Asia	TRUE
S024_T1	S003_T0	0.863165	S003_T0__S024_T1	FALSE	S024	S003	FALSE	Post-travel	Pre-travel	FALSE	Southern Asia	Southeastern Asia	FALSE
S148_T0	S003_T0	0.955892	S003_T0__S148_T0	FALSE	S148	S003	FALSE	Pre-travel	Pre-travel	TRUE	Northern Africa	Southeastern Asia	FALSE
S175_T0	S003_T0	0.496218	S003_T0__S175_T0	FALSE	S175	S003	FALSE	Pre-travel	Pre-travel	TRUE	Northern Africa	Southeastern Asia	FALSE
S053_T0	S003_T0	0.975071	S003_T0__S053_T0	FALSE	S053	S003	FALSE	Pre-travel	Pre-travel	TRUE	Northern Africa	Southeastern Asia	FALSE
S142_T0	S003_T0	0.792877	S003_T0__S142_T0	FALSE	S142	S003	FALSE	Pre-travel	Pre-travel	TRUE	Eastern Africa	Southeastern Asia	FALSE
S113_T0	S003_T0	0.642424	S003_T0__S113_T0	FALSE	S113	S003	FALSE	Pre-travel	Pre-travel	TRUE	Eastern Africa	Southeastern Asia	FALSE
S065_T0	S003_T0	0.758076	S003_T0__S065_T0	FALSE	S065	S003	FALSE	Pre-travel	Pre-travel	TRUE	Eastern Africa	Southeastern Asia	FALSE
S082_T0	S003_T0	0.615225	S003_T0__S082_T0	FALSE	S082	S003	FALSE	Pre-travel	Pre-travel	TRUE	Northern Africa	Southeastern Asia	FALSE
S019_T1	S003_T0	0.574426	S003_T0__S019_T1	FALSE	S019	S003	FALSE	Post-travel	Pre-travel	FALSE	Northern Africa	Southeastern Asia	FALSE
S101_T0	S003_T0	0.901822	S003_T0__S101_T0	FALSE	S101	S003	FALSE	Pre-travel	Pre-travel	TRUE	Southeastern Asia	Southeastern Asia	TRUE
S055_T0	S003_T0	0.838495	S003_T0__S055_T0	FALSE	S055	S003	FALSE	Pre-travel	Pre-travel	TRUE	Eastern Africa	Southeastern Asia	FALSE
S168_T1	S003_T0	0.705844	S003_T0__S168_T1	FALSE	S168	S003	FALSE	Post-travel	Pre-travel	FALSE	Southern Asia	Southeastern Asia	FALSE
S067_T0	S003_T0	0.504006	S003_T0__S067_T0	FALSE	S067	S003	FALSE	Pre-travel	Pre-travel	TRUE	Eastern Africa	Southeastern Asia	FALSE
S188_T0	S003_T0	0.93766	S003_T0__S188_T0	FALSE	S188	S003	FALSE	Pre-travel	Pre-travel	TRUE	Northern Africa	Southeastern Asia	FALSE
S046_T1	S003_T0	0.710067	S003_T0__S046_T1	FALSE	S046	S003	FALSE	Post-travel	Pre-travel	FALSE	Southern Asia	Southeastern Asia	FALSE
S178_T0	S003_T0	0.877428	S003_T0__S178_T0	FALSE	S178	S003	FALSE	Pre-travel	Pre-travel	TRUE	Eastern Africa	Southeastern Asia	FALSE
S025_T0	S003_T0	0.913732	S003_T0__S025_T0	FALSE	S025	S003	FALSE	Pre-travel	Pre-travel	TRUE	Southern Asia	Southeastern Asia	FALSE
S030_T0	S003_T0	0.927044	S003_T0__S030_T0	FALSE	S030	S003	FALSE	Pre-travel	Pre-travel	TRUE	Southeastern Asia	Southeastern Asia	TRUE
S135_T1	S003_T0	0.702176	S003_T0__S135_T1	FALSE	S135	S003	FALSE	Post-travel	Pre-travel	FALSE	Southern Asia	Southeastern Asia	FALSE
S126_T1	S003_T0	0.660621	S003_T0__S126_T1	FALSE	S126	S003	FALSE	Post-travel	Pre-travel	FALSE	Southeastern Asia	Southeastern Asia	TRUE
S023_T1	S003_T0	0.967072	S003_T0__S023_T1	FALSE	S023	S003	FALSE	Post-travel	Pre-travel	FALSE	Southern Asia	Southeastern Asia	FALSE
S032_T0	S003_T0	0.885992	S003_T0__S032_T0	FALSE	S032	S003	FALSE	Pre-travel	Pre-travel	TRUE	Southeastern Asia	Southeastern Asia	TRUE
S160_T1	S003_T0	0.863075	S003_T0__S160_T1	FALSE	S160	S003	FALSE	Post-travel	Pre-travel	FALSE	Southeastern Asia	Southeastern Asia	TRUE
S005_T1	S003_T0	0.726954	S003_T0__S005_T1	FALSE	S005	S003	FALSE	Post-travel	Pre-travel	FALSE	Southern Asia	Southeastern Asia	FALSE
S177_T0	S003_T0	0.901492	S003_T0__S177_T0	FALSE	S177	S003	FALSE	Pre-travel	Pre-travel	TRUE	Southeastern Asia	Southeastern Asia	TRUE
S107_T1	S003_T0	0.553996	S003_T0__S107_T1	FALSE	S107	S003	FALSE	Post-travel	Pre-travel	FALSE	Southern Asia	Southeastern Asia	FALSE
S120_T0	S003_T0	0.893226	S003_T0__S120_T0	FALSE	S120	S003	FALSE	Pre-travel	Pre-travel	TRUE	Southern Asia	Southeastern Asia	FALSE
S129_T1	S003_T0	0.804712	S003_T0__S129_T1	FALSE	S129	S003	FALSE	Post-travel	Pre-travel	FALSE	Eastern Africa	Southeastern Asia	FALSE
S178_T1	S003_T0	0.658358	S003_T0__S178_T1	FALSE	S178	S003	FALSE	Post-travel	Pre-travel	FALSE	Eastern Africa	Southeastern Asia	FALSE
S154_T0	S003_T0	0.610046	S003_T0__S154_T0	FALSE	S154	S003	FALSE	Pre-travel	Pre-travel	TRUE	Southern Asia	Southeastern Asia	FALSE
S142_T1	S003_T0	0.84608	S003_T0__S142_T1	FALSE	S142	S003	FALSE	Post-travel	Pre-travel	FALSE	Eastern Africa	Southeastern Asia	FALSE
S011_T1	S003_T0	0.680375	S003_T0__S011_T1	FALSE	S011	S003	FALSE	Post-travel	Pre-travel	FALSE	Southeastern Asia	Southeastern Asia	TRUE
S092_T1	S003_T0	0.925398	S003_T0__S092_T1	FALSE	S092	S003	FALSE	Post-travel	Pre-travel	FALSE	Northern Africa	Southeastern Asia	FALSE
S156_T0	S003_T0	0.94784	S003_T0__S156_T0	FALSE	S156	S003	FALSE	Pre-travel	Pre-travel	TRUE	Southeastern Asia	Southeastern Asia	TRUE
S020_T1	S003_T0	0.969745	S003_T0__S020_T1	FALSE	S020	S003	FALSE	Post-travel	Pre-travel	FALSE	Southeastern Asia	Southeastern Asia	TRUE
S094_T1	S003_T0	0.763365	S003_T0__S094_T1	FALSE	S094	S003	FALSE	Post-travel	Pre-travel	FALSE	Northern Africa	Southeastern Asia	FALSE
S132_T0	S003_T0	0.306761	S003_T0__S132_T0	FALSE	S132	S003	FALSE	Pre-travel	Pre-travel	TRUE	Northern Africa	Southeastern Asia	FALSE
S174_T0	S003_T0	0.771746	S003_T0__S174_T0	FALSE	S174	S003	FALSE	Pre-travel	Pre-travel	TRUE	Southeastern Asia	Southeastern Asia	TRUE
S189_T1	S003_T0	0.491427	S003_T0__S189_T1	FALSE	S189	S003	FALSE	Post-travel	Pre-travel	FALSE	Northern Africa	Southeastern Asia	FALSE
S005_T0	S003_T0	0.733366	S003_T0__S005_T0	FALSE	S005	S003	FALSE	Pre-travel	Pre-travel	TRUE	Southern Asia	Southeastern Asia	FALSE
S119_T1	S003_T0	0.862833	S003_T0__S119_T1	FALSE	S119	S003	FALSE	Post-travel	Pre-travel	FALSE	Southeastern Asia	Southeastern Asia	TRUE
S112_T0	S003_T0	0.825269	S003_T0__S112_T0	FALSE	S112	S003	FALSE	Pre-travel	Pre-travel	TRUE	Northern Africa	Southeastern Asia	FALSE
S015_T0	S003_T0	0.612926	S003_T0__S015_T0	FALSE	S015	S003	FALSE	Pre-travel	Pre-travel	TRUE	Southern Asia	Southeastern Asia	FALSE
S127_T1	S003_T0	0.843251	S003_T0__S127_T1	FALSE	S127	S003	FALSE	Post-travel	Pre-travel	FALSE	Southeastern Asia	Southeastern Asia	TRUE
S059_T0	S003_T0	0.667953	S003_T0__S059_T0	FALSE	S059	S003	FALSE	Pre-travel	Pre-travel	TRUE	Southeastern Asia	Southeastern Asia	TRUE
S088_T1	S003_T0	0.989601	S003_T0__S088_T1	FALSE	S088	S003	FALSE	Post-travel	Pre-travel	FALSE	Eastern Africa	Southeastern Asia	FALSE
S038_T0	S003_T0	0.578411	S003_T0__S038_T0	FALSE	S038	S003	FALSE	Pre-travel	Pre-travel	TRUE	Southeastern Asia	Southeastern Asia	TRUE
S065_T1	S003_T0	0.917605	S003_T0__S065_T1	FALSE	S065	S003	FALSE	Post-travel	Pre-travel	FALSE	Eastern Africa	Southeastern Asia	FALSE
S083_T1	S003_T0	0.53175	S003_T0__S083_T1	FALSE	S083	S003	FALSE	Post-travel	Pre-travel	FALSE	Northern Africa	Southeastern Asia	FALSE
S071_T0	S003_T0	0.556353	S003_T0__S071_T0	FALSE	S071	S003	FALSE	Pre-travel	Pre-travel	TRUE	Southeastern Asia	Southeastern Asia	TRUE
S050_T1	S003_T0	0.73799	S003_T0__S050_T1	FALSE	S050	S003	FALSE	Post-travel	Pre-travel	FALSE	Southern Asia	Southeastern Asia	FALSE
S068_T1	S003_T0	0.861653	S003_T0__S068_T1	FALSE	S068	S003	FALSE	Post-travel	Pre-travel	FALSE	Eastern Africa	Southeastern Asia	FALSE
S109_T1	S003_T0	0.747587	S003_T0__S109_T1	FALSE	S109	S003	FALSE	Post-travel	Pre-travel	FALSE	Southern Asia	Southeastern Asia	FALSE
S036_T0	S003_T0	0.944799	S003_T0__S036_T0	FALSE	S036	S003	FALSE	Pre-travel	Pre-travel	TRUE	Southeastern Asia	Southeastern Asia	TRUE
S179_T0	S003_T0	0.460878	S003_T0__S179_T0	FALSE	S179	S003	FALSE	Pre-travel	Pre-travel	TRUE	Southeastern Asia	Southeastern Asia	TRUE
S079_T1	S003_T0	0.668554	S003_T0__S079_T1	FALSE	S079	S003	FALSE	Post-travel	Pre-travel	FALSE	Southern Asia	Southeastern Asia	FALSE
S163_T1	S003_T0	0.688717	S003_T0__S163_T1	FALSE	S163	S003	FALSE	Post-travel	Pre-travel	FALSE	Northern Africa	Southeastern Asia	FALSE
S162_T1	S003_T0	0.557362	S003_T0__S162_T1	FALSE	S162	S003	FALSE	Post-travel	Pre-travel	FALSE	Northern Africa	Southeastern Asia	FALSE
S095_T0	S003_T0	0.621997	S003_T0__S095_T0	FALSE	S095	S003	FALSE	Pre-travel	Pre-travel	TRUE	Northern Africa	Southeastern Asia	FALSE
S190_T1	S003_T0	0.946965	S003_T0__S190_T1	FALSE	S190	S003	FALSE	Post-travel	Pre-travel	FALSE	Eastern Africa	Southeastern Asia	FALSE
S124_T1	S003_T0	0.699353	S003_T0__S124_T1	FALSE	S124	S003	FALSE	Post-travel	Pre-travel	FALSE	Southeastern Asia	Southeastern Asia	TRUE
S125_T0	S003_T0	0.874641	S003_T0__S125_T0	FALSE	S125	S003	FALSE	Pre-travel	Pre-travel	TRUE	Southern Asia	Southeastern Asia	FALSE
S007_T0	S003_T0	0.510431	S003_T0__S007_T0	FALSE	S007	S003	FALSE	Pre-travel	Pre-travel	TRUE	Southern Asia	Southeastern Asia	FALSE
S029_T1	S003_T0	0.836257	S003_T0__S029_T1	FALSE	S029	S003	FALSE	Post-travel	Pre-travel	FALSE	Eastern Africa	Southeastern Asia	FALSE
S163_T0	S003_T0	0.717275	S003_T0__S163_T0	FALSE	S163	S003	FALSE	Pre-travel	Pre-travel	TRUE	Northern Africa	Southeastern Asia	FALSE
S097_T0	S003_T0	0.623258	S003_T0__S097_T0	FALSE	S097	S003	FALSE	Pre-travel	Pre-travel	TRUE	Eastern Africa	Southeastern Asia	FALSE
S098_T1	S003_T0	0.977748	S003_T0__S098_T1	FALSE	S098	S003	FALSE	Post-travel	Pre-travel	FALSE	Eastern Africa	Southeastern Asia	FALSE
S006_T1	S003_T0	0.65593	S003_T0__S006_T1	FALSE	S006	S003	FALSE	Post-travel	Pre-travel	FALSE	Southern Asia	Southeastern Asia	FALSE
S153_T1	S003_T0	0.896662	S003_T0__S153_T1	FALSE	S153	S003	FALSE	Post-travel	Pre-travel	FALSE	Eastern Africa	Southeastern Asia	FALSE
S128_T1	S003_T0	0.884717	S003_T0__S128_T1	FALSE	S128	S003	FALSE	Post-travel	Pre-travel	FALSE	Northern Africa	Southeastern Asia	FALSE
S180_T0	S003_T0	0.445499	S003_T0__S180_T0	FALSE	S180	S003	FALSE	Pre-travel	Pre-travel	TRUE	Southern Asia	Southeastern Asia	FALSE
S123_T1	S003_T0	0.576496	S003_T0__S123_T1	FALSE	S123	S003	FALSE	Post-travel	Pre-travel	FALSE	Eastern Africa	Southeastern Asia	FALSE
S111_T1	S003_T0	0.65526	S003_T0__S111_T1	FALSE	S111	S003	FALSE	Post-travel	Pre-travel	FALSE	Northern Africa	Southeastern Asia	FALSE
S106_T1	S003_T0	0.733036	S003_T0__S106_T1	FALSE	S106	S003	FALSE	Post-travel	Pre-travel	FALSE	Southeastern Asia	Southeastern Asia	TRUE
S029_T0	S003_T0	0.925311	S003_T0__S029_T0	FALSE	S029	S003	FALSE	Pre-travel	Pre-travel	TRUE	Eastern Africa	Southeastern Asia	FALSE
S131_T0	S003_T0	0.805862	S003_T0__S131_T0	FALSE	S131	S003	FALSE	Pre-travel	Pre-travel	TRUE	Northern Africa	Southeastern Asia	FALSE
S083_T0	S003_T0	0.539388	S003_T0__S083_T0	FALSE	S083	S003	FALSE	Pre-travel	Pre-travel	TRUE	Northern Africa	Southeastern Asia	FALSE
S171_T0	S003_T0	0.935184	S003_T0__S171_T0	FALSE	S171	S003	FALSE	Pre-travel	Pre-travel	TRUE	Southeastern Asia	Southeastern Asia	TRUE
S061_T0	S003_T0	0.561068	S003_T0__S061_T0	FALSE	S061	S003	FALSE	Pre-travel	Pre-travel	TRUE	Southeastern Asia	Southeastern Asia	TRUE
S080_T0	S003_T0	0.2985	S003_T0__S080_T0	FALSE	S080	S003	FALSE	Pre-travel	Pre-travel	TRUE	Southeastern Asia	Southeastern Asia	TRUE
S052_T0	S003_T0	0.789777	S003_T0__S052_T0	FALSE	S052	S003	FALSE	Pre-travel	Pre-travel	TRUE	Southeastern Asia	Southeastern Asia	TRUE
S098_T0	S003_T0	0.794082	S003_T0__S098_T0	FALSE	S098	S003	FALSE	Pre-travel	Pre-travel	TRUE	Eastern Africa	Southeastern Asia	FALSE
S141_T1	S003_T0	0.952339	S003_T0__S141_T1	FALSE	S141	S003	FALSE	Post-travel	Pre-travel	FALSE	Eastern Africa	Southeastern Asia	FALSE
S033_T1	S003_T0	0.713964	S003_T0__S033_T1	FALSE	S033	S003	FALSE	Post-travel	Pre-travel	FALSE	Southern Asia	Southeastern Asia	FALSE
S067_T1	S003_T0	0.66973	S003_T0__S067_T1	FALSE	S067	S003	FALSE	Post-travel	Pre-travel	FALSE	Eastern Africa	Southeastern Asia	FALSE
S026_T0	S003_T0	0.785207	S003_T0__S026_T0	FALSE	S026	S003	FALSE	Pre-travel	Pre-travel	TRUE	Southeastern Asia	Southeastern Asia	TRUE
S134_T1	S003_T0	0.594549	S003_T0__S134_T1	FALSE	S134	S003	FALSE	Post-travel	Pre-travel	FALSE	Southeastern Asia	Southeastern Asia	TRUE
S169_T1	S003_T0	0.777775	S003_T0__S169_T1	FALSE	S169	S003	FALSE	Post-travel	Pre-travel	FALSE	Southern Asia	Southeastern Asia	FALSE
S040_T0	S003_T0	0.777145	S003_T0__S040_T0	FALSE	S040	S003	FALSE	Pre-travel	Pre-travel	TRUE	Northern Africa	Southeastern Asia	FALSE
S181_T1	S003_T0	0.656555	S003_T0__S181_T1	FALSE	S181	S003	FALSE	Post-travel	Pre-travel	FALSE	Southern Asia	Southeastern Asia	FALSE
S007_T1	S003_T0	0.75375	S003_T0__S007_T1	FALSE	S007	S003	FALSE	Post-travel	Pre-travel	FALSE	Southern Asia	Southeastern Asia	FALSE
S073_T1	S003_T0	0.841376	S003_T0__S073_T1	FALSE	S073	S003	FALSE	Post-travel	Pre-travel	FALSE	Eastern Africa	Southeastern Asia	FALSE
S158_T0	S003_T0	0.483325	S003_T0__S158_T0	FALSE	S158	S003	FALSE	Pre-travel	Pre-travel	TRUE	Southern Asia	Southeastern Asia	FALSE
S027_T1	S003_T0	0.650707	S003_T0__S027_T1	FALSE	S027	S003	FALSE	Post-travel	Pre-travel	FALSE	Eastern Africa	Southeastern Asia	FALSE
S177_T1	S003_T0	0.956189	S003_T0__S177_T1	FALSE	S177	S003	FALSE	Post-travel	Pre-travel	FALSE	Southeastern Asia	Southeastern Asia	TRUE
S021_T1	S003_T0	0.863019	S003_T0__S021_T1	FALSE	S021	S003	FALSE	Post-travel	Pre-travel	FALSE	Northern Africa	Southeastern Asia	FALSE
S090_T1	S003_T0	0.909253	S003_T0__S090_T1	FALSE	S090	S003	FALSE	Post-travel	Pre-travel	FALSE	Eastern Africa	Southeastern Asia	FALSE
S164_T0	S003_T0	0.556794	S003_T0__S164_T0	FALSE	S164	S003	FALSE	Pre-travel	Pre-travel	TRUE	Southeastern Asia	Southeastern Asia	TRUE
S170_T1	S003_T0	0.944291	S003_T0__S170_T1	FALSE	S170	S003	FALSE	Post-travel	Pre-travel	FALSE	Southeastern Asia	Southeastern Asia	TRUE
S011_T0	S003_T0	0.65884	S003_T0__S011_T0	FALSE	S011	S003	FALSE	Pre-travel	Pre-travel	TRUE	Southeastern Asia	Southeastern Asia	TRUE
S104_T0	S003_T0	0.69824	S003_T0__S104_T0	FALSE	S104	S003	FALSE	Pre-travel	Pre-travel	TRUE	Northern Africa	Southeastern Asia	FALSE
S074_T1	S003_T0	0.58014	S003_T0__S074_T1	FALSE	S074	S003	FALSE	Post-travel	Pre-travel	FALSE	Northern Africa	Southeastern Asia	FALSE
S016_T0	S003_T0	0.589645	S003_T0__S016_T0	FALSE	S016	S003	FALSE	Pre-travel	Pre-travel	TRUE	Northern Africa	Southeastern Asia	FALSE
S146_T1	S003_T0	0.79562	S003_T0__S146_T1	FALSE	S146	S003	FALSE	Post-travel	Pre-travel	FALSE	Northern Africa	Southeastern Asia	FALSE
S188_T1	S003_T0	0.723427	S003_T0__S188_T1	FALSE	S188	S003	FALSE	Post-travel	Pre-travel	FALSE	Northern Africa	Southeastern Asia	FALSE
S085_T1	S003_T0	0.647719	S003_T0__S085_T1	FALSE	S085	S003	FALSE	Post-travel	Pre-travel	FALSE	Southern Asia	Southeastern Asia	FALSE
S077_T1	S003_T0	0.727207	S003_T0__S077_T1	FALSE	S077	S003	FALSE	Post-travel	Pre-travel	FALSE	Eastern Africa	Southeastern Asia	FALSE
S161_T0	S003_T0	0.773872	S003_T0__S161_T0	FALSE	S161	S003	FALSE	Pre-travel	Pre-travel	TRUE	Northern Africa	Southeastern Asia	FALSE
S099_T0	S003_T0	0.936683	S003_T0__S099_T0	FALSE	S099	S003	FALSE	Pre-travel	Pre-travel	TRUE	Southern Asia	Southeastern Asia	FALSE
S009_T1	S003_T0	0.595124	S003_T0__S009_T1	FALSE	S009	S003	FALSE	Post-travel	Pre-travel	FALSE	Northern Africa	Southeastern Asia	FALSE
S041_T1	S003_T0	0.917189	S003_T0__S041_T1	FALSE	S041	S003	FALSE	Post-travel	Pre-travel	FALSE	Southern Asia	Southeastern Asia	FALSE
S035_T1	S003_T0	0.561095	S003_T0__S035_T1	FALSE	S035	S003	FALSE	Post-travel	Pre-travel	FALSE	Eastern Africa	Southeastern Asia	FALSE
S139_T0	S003_T0	0.551927	S003_T0__S139_T0	FALSE	S139	S003	FALSE	Pre-travel	Pre-travel	TRUE	Southeastern Asia	Southeastern Asia	TRUE
S152_T1	S003_T0	0.9011	S003_T0__S152_T1	FALSE	S152	S003	FALSE	Post-travel	Pre-travel	FALSE	Eastern Africa	Southeastern Asia	FALSE
S138_T1	S003_T0	0.864836	S003_T0__S138_T1	FALSE	S138	S003	FALSE	Post-travel	Pre-travel	FALSE	Southern Asia	Southeastern Asia	FALSE
S075_T0	S003_T0	0.913114	S003_T0__S075_T0	FALSE	S075	S003	FALSE	Pre-travel	Pre-travel	TRUE	Northern Africa	Southeastern Asia	FALSE
S017_T1	S003_T0	0.937635	S003_T0__S017_T1	FALSE	S017	S003	FALSE	Post-travel	Pre-travel	FALSE	Southern Asia	Southeastern Asia	FALSE
S189_T0	S003_T0	0.379392	S003_T0__S189_T0	FALSE	S189	S003	FALSE	Pre-travel	Pre-travel	TRUE	Northern Africa	Southeastern Asia	FALSE
S026_T1	S003_T0	0.933339	S003_T0__S026_T1	FALSE	S026	S003	FALSE	Post-travel	Pre-travel	FALSE	Southeastern Asia	Southeastern Asia	TRUE
S143_T1	S003_T0	0.91817	S003_T0__S143_T1	FALSE	S143	S003	FALSE	Post-travel	Pre-travel	FALSE	Eastern Africa	Southeastern Asia	FALSE
S157_T0	S003_T0	0.792411	S003_T0__S157_T0	FALSE	S157	S003	FALSE	Pre-travel	Pre-travel	TRUE	Southeastern Asia	Southeastern Asia	TRUE
S061_T1	S003_T0	0.984067	S003_T0__S061_T1	FALSE	S061	S003	FALSE	Post-travel	Pre-travel	FALSE	Southeastern Asia	Southeastern Asia	TRUE
S158_T1	S003_T0	0.731178	S003_T0__S158_T1	FALSE	S158	S003	FALSE	Post-travel	Pre-travel	FALSE	Southern Asia	Southeastern Asia	FALSE
S175_T1	S003_T0	0.691261	S003_T0__S175_T1	FALSE	S175	S003	FALSE	Post-travel	Pre-travel	FALSE	Northern Africa	Southeastern Asia	FALSE
S151_T1	S003_T0	0.788219	S003_T0__S151_T1	FALSE	S151	S003	FALSE	Post-travel	Pre-travel	FALSE	Southern Asia	Southeastern Asia	FALSE
S149_T1	S003_T0	0.90492	S003_T0__S149_T1	FALSE	S149	S003	FALSE	Post-travel	Pre-travel	FALSE	Eastern Africa	Southeastern Asia	FALSE
S173_T0	S003_T0	0.863095	S003_T0__S173_T0	FALSE	S173	S003	FALSE	Pre-travel	Pre-travel	TRUE	Southeastern Asia	Southeastern Asia	TRUE
S115_T1	S003_T0	0.435681	S003_T0__S115_T1	FALSE	S115	S003	FALSE	Post-travel	Pre-travel	FALSE	Southeastern Asia	Southeastern Asia	TRUE
S130_T1	S003_T0	0.858681	S003_T0__S130_T1	FALSE	S130	S003	FALSE	Post-travel	Pre-travel	FALSE	Southeastern Asia	Southeastern Asia	TRUE
S096_T1	S003_T0	0.626299	S003_T0__S096_T1	FALSE	S096	S003	FALSE	Post-travel	Pre-travel	FALSE	Eastern Africa	Southeastern Asia	FALSE
S079_T0	S003_T0	0.782235	S003_T0__S079_T0	FALSE	S079	S003	FALSE	Pre-travel	Pre-travel	TRUE	Southern Asia	Southeastern Asia	FALSE
S071_T1	S003_T0	0.839277	S003_T0__S071_T1	FALSE	S071	S003	FALSE	Post-travel	Pre-travel	FALSE	Southeastern Asia	Southeastern Asia	TRUE
S077_T0	S003_T0	0.576503	S003_T0__S077_T0	FALSE	S077	S003	FALSE	Pre-travel	Pre-travel	TRUE	Eastern Africa	Southeastern Asia	FALSE
S036_T1	S003_T0	0.925387	S003_T0__S036_T1	FALSE	S036	S003	FALSE	Post-travel	Pre-travel	FALSE	Southeastern Asia	Southeastern Asia	TRUE
S173_T1	S003_T0	0.936346	S003_T0__S173_T1	FALSE	S173	S003	FALSE	Post-travel	Pre-travel	FALSE	Southeastern Asia	Southeastern Asia	TRUE
S048_T0	S003_T0	0.651577	S003_T0__S048_T0	FALSE	S048	S003	FALSE	Pre-travel	Pre-travel	TRUE	Northern Africa	Southeastern Asia	FALSE
S006_T0	S003_T0	0.528353	S003_T0__S006_T0	FALSE	S006	S003	FALSE	Pre-travel	Pre-travel	TRUE	Southern Asia	Southeastern Asia	FALSE
S057_T1	S003_T0	0.544667	S003_T0__S057_T1	FALSE	S057	S003	FALSE	Post-travel	Pre-travel	FALSE	Southern Asia	Southeastern Asia	FALSE
S091_T1	S003_T0	0.546773	S003_T0__S091_T1	FALSE	S091	S003	FALSE	Post-travel	Pre-travel	FALSE	Eastern Africa	Southeastern Asia	FALSE
S023_T0	S003_T0	0.863882	S003_T0__S023_T0	FALSE	S023	S003	FALSE	Pre-travel	Pre-travel	TRUE	Southern Asia	Southeastern Asia	FALSE
S022_T1	S003_T0	0.949525	S003_T0__S022_T1	FALSE	S022	S003	FALSE	Post-travel	Pre-travel	FALSE	Northern Africa	Southeastern Asia	FALSE
S120_T1	S003_T0	0.843692	S003_T0__S120_T1	FALSE	S120	S003	FALSE	Post-travel	Pre-travel	FALSE	Southern Asia	Southeastern Asia	FALSE
S089_T1	S003_T0	0.87432	S003_T0__S089_T1	FALSE	S089	S003	FALSE	Post-travel	Pre-travel	FALSE	Eastern Africa	Southeastern Asia	FALSE
S014_T0	S003_T0	0.76084	S003_T0__S014_T0	FALSE	S014	S003	FALSE	Pre-travel	Pre-travel	TRUE	Northern Africa	Southeastern Asia	FALSE
S013_T1	S003_T0	0.561815	S003_T0__S013_T1	FALSE	S013	S003	FALSE	Post-travel	Pre-travel	FALSE	Eastern Africa	Southeastern Asia	FALSE
S013_T0	S003_T0	0.570223	S003_T0__S013_T0	FALSE	S013	S003	FALSE	Pre-travel	Pre-travel	TRUE	Eastern Africa	Southeastern Asia	FALSE
S117_T1	S003_T0	0.725921	S003_T0__S117_T1	FALSE	S117	S003	FALSE	Post-travel	Pre-travel	FALSE	Southeastern Asia	Southeastern Asia	TRUE
S183_T1	S003_T0	0.943757	S003_T0__S183_T1	FALSE	S183	S003	FALSE	Post-travel	Pre-travel	FALSE	Southern Asia	Southeastern Asia	FALSE
S159_T1	S003_T0	0.889061	S003_T0__S159_T1	FALSE	S159	S003	FALSE	Post-travel	Pre-travel	FALSE	Southern Asia	Southeastern Asia	FALSE
S045_T0	S003_T0	0.643129	S003_T0__S045_T0	FALSE	S045	S003	FALSE	Pre-travel	Pre-travel	TRUE	Southern Asia	Southeastern Asia	FALSE
S034_T0	S003_T0	0.561487	S003_T0__S034_T0	FALSE	S034	S003	FALSE	Pre-travel	Pre-travel	TRUE	Southern Asia	Southeastern Asia	FALSE
S054_T0	S003_T0	0.6545	S003_T0__S054_T0	FALSE	S054	S003	FALSE	Pre-travel	Pre-travel	TRUE	Northern Africa	Southeastern Asia	FALSE
S145_T1	S003_T0	0.822581	S003_T0__S145_T1	FALSE	S145	S003	FALSE	Post-travel	Pre-travel	FALSE	Northern Africa	Southeastern Asia	FALSE
S102_T1	S003_T0	0.747831	S003_T0__S102_T1	FALSE	S102	S003	FALSE	Post-travel	Pre-travel	FALSE	Southeastern Asia	Southeastern Asia	TRUE
S164_T1	S003_T0	0.601071	S003_T0__S164_T1	FALSE	S164	S003	FALSE	Post-travel	Pre-travel	FALSE	Southeastern Asia	Southeastern Asia	TRUE
S080_T1	S003_T0	0.616307	S003_T0__S080_T1	FALSE	S080	S003	FALSE	Post-travel	Pre-travel	FALSE	Southeastern Asia	Southeastern Asia	TRUE
S056_T1	S003_T0	0.73484	S003_T0__S056_T1	FALSE	S056	S003	FALSE	Post-travel	Pre-travel	FALSE	Southern Asia	Southeastern Asia	FALSE
S165_T0	S003_T0	0.807191	S003_T0__S165_T0	FALSE	S165	S003	FALSE	Pre-travel	Pre-travel	TRUE	Southern Asia	Southeastern Asia	FALSE
S159_T0	S003_T0	0.794859	S003_T0__S159_T0	FALSE	S159	S003	FALSE	Pre-travel	Pre-travel	TRUE	Southern Asia	Southeastern Asia	FALSE
S072_T0	S003_T0	0.377559	S003_T0__S072_T0	FALSE	S072	S003	FALSE	Pre-travel	Pre-travel	TRUE	Eastern Africa	Southeastern Asia	FALSE
S186_T0	S003_T0	0.792508	S003_T0__S186_T0	FALSE	S186	S003	FALSE	Pre-travel	Pre-travel	TRUE	Southern Asia	Southeastern Asia	FALSE
S089_T0	S003_T0	0.831587	S003_T0__S089_T0	FALSE	S089	S003	FALSE	Pre-travel	Pre-travel	TRUE	Eastern Africa	Southeastern Asia	FALSE
S186_T1	S003_T0	0.847449	S003_T0__S186_T1	FALSE	S186	S003	FALSE	Post-travel	Pre-travel	FALSE	Southern Asia	Southeastern Asia	FALSE
S110_T1	S003_T0	0.929371	S003_T0__S110_T1	FALSE	S110	S003	FALSE	Post-travel	Pre-travel	FALSE	Southeastern Asia	Southeastern Asia	TRUE
S151_T0	S003_T0	0.884739	S003_T0__S151_T0	FALSE	S151	S003	FALSE	Pre-travel	Pre-travel	TRUE	Southern Asia	Southeastern Asia	FALSE
S174_T1	S003_T0	0.819289	S003_T0__S174_T1	FALSE	S174	S003	FALSE	Post-travel	Pre-travel	FALSE	Southeastern Asia	Southeastern Asia	TRUE
S113_T1	S003_T0	0.682167	S003_T0__S113_T1	FALSE	S113	S003	FALSE	Post-travel	Pre-travel	FALSE	Eastern Africa	Southeastern Asia	FALSE
S111_T0	S003_T0	0.519398	S003_T0__S111_T0	FALSE	S111	S003	FALSE	Pre-travel	Pre-travel	TRUE	Northern Africa	Southeastern Asia	FALSE
S082_T1	S003_T0	0.642148	S003_T0__S082_T1	FALSE	S082	S003	FALSE	Post-travel	Pre-travel	FALSE	Northern Africa	Southeastern Asia	FALSE
S072_T1	S003_T0	0.763838	S003_T0__S072_T1	FALSE	S072	S003	FALSE	Post-travel	Pre-travel	FALSE	Eastern Africa	Southeastern Asia	FALSE
S058_T1	S003_T0	0.665286	S003_T0__S058_T1	FALSE	S058	S003	FALSE	Post-travel	Pre-travel	FALSE	Southern Asia	Southeastern Asia	FALSE
S184_T1	S003_T0	0.781819	S003_T0__S184_T1	FALSE	S184	S003	FALSE	Post-travel	Pre-travel	FALSE	Northern Africa	Southeastern Asia	FALSE
S064_T0	S003_T0	0.965449	S003_T0__S064_T0	FALSE	S064	S003	FALSE	Pre-travel	Pre-travel	TRUE	Southeastern Asia	Southeastern Asia	TRUE
S145_T0	S003_T0	0.670204	S003_T0__S145_T0	FALSE	S145	S003	FALSE	Pre-travel	Pre-travel	TRUE	Northern Africa	Southeastern Asia	FALSE
S034_T1	S003_T0	0.553478	S003_T0__S034_T1	FALSE	S034	S003	FALSE	Post-travel	Pre-travel	FALSE	Southern Asia	Southeastern Asia	FALSE
S185_T1	S003_T0	0.823819	S003_T0__S185_T1	FALSE	S185	S003	FALSE	Post-travel	Pre-travel	FALSE	Southeastern Asia	Southeastern Asia	TRUE
S116_T0	S003_T0	0.496574	S003_T0__S116_T0	FALSE	S116	S003	FALSE	Pre-travel	Pre-travel	TRUE	Southeastern Asia	Southeastern Asia	TRUE
S165_T1	S003_T0	0.736453	S003_T0__S165_T1	FALSE	S165	S003	FALSE	Post-travel	Pre-travel	FALSE	Southern Asia	Southeastern Asia	FALSE
S144_T1	S003_T0	0.846205	S003_T0__S144_T1	FALSE	S144	S003	FALSE	Post-travel	Pre-travel	FALSE	Eastern Africa	Southeastern Asia	FALSE
S056_T0	S003_T0	0.80394	S003_T0__S056_T0	FALSE	S056	S003	FALSE	Pre-travel	Pre-travel	TRUE	Southern Asia	Southeastern Asia	FALSE
S116_T1	S003_T0	0.889278	S003_T0__S116_T1	FALSE	S116	S003	FALSE	Post-travel	Pre-travel	FALSE	Southeastern Asia	Southeastern Asia	TRUE
S101_T1	S003_T0	0.803287	S003_T0__S101_T1	FALSE	S101	S003	FALSE	Post-travel	Pre-travel	FALSE	Southeastern Asia	Southeastern Asia	TRUE
S129_T0	S003_T0	0.80538	S003_T0__S129_T0	FALSE	S129	S003	FALSE	Pre-travel	Pre-travel	TRUE	Eastern Africa	Southeastern Asia	FALSE
S139_T1	S003_T0	0.891875	S003_T0__S139_T1	FALSE	S139	S003	FALSE	Post-travel	Pre-travel	FALSE	Southeastern Asia	Southeastern Asia	TRUE
S004_T1	S003_T0	0.669795	S003_T0__S004_T1	FALSE	S004	S003	FALSE	Post-travel	Pre-travel	FALSE	Southeastern Asia	Southeastern Asia	TRUE
S086_T1	S003_T0	0.669744	S003_T0__S086_T1	FALSE	S086	S003	FALSE	Post-travel	Pre-travel	FALSE	Northern Africa	Southeastern Asia	FALSE
S087_T0	S003_T0	0.869228	S003_T0__S087_T0	FALSE	S087	S003	FALSE	Pre-travel	Pre-travel	TRUE	Eastern Africa	Southeastern Asia	FALSE
S108_T1	S003_T0	0.884764	S003_T0__S108_T1	FALSE	S108	S003	FALSE	Post-travel	Pre-travel	FALSE	Southern Asia	Southeastern Asia	FALSE
S181_T0	S003_T0	0.778328	S003_T0__S181_T0	FALSE	S181	S003	FALSE	Pre-travel	Pre-travel	TRUE	Southern Asia	Southeastern Asia	FALSE
S022_T0	S003_T0	0.950952	S003_T0__S022_T0	FALSE	S022	S003	FALSE	Pre-travel	Pre-travel	TRUE	Northern Africa	Southeastern Asia	FALSE
S033_T0	S003_T0	0.545947	S003_T0__S033_T0	FALSE	S033	S003	FALSE	Pre-travel	Pre-travel	TRUE	Southern Asia	Southeastern Asia	FALSE
S019_T0	S003_T0	0.57182	S003_T0__S019_T0	FALSE	S019	S003	FALSE	Pre-travel	Pre-travel	TRUE	Northern Africa	Southeastern Asia	FALSE
S172_T0	S003_T0	0.757325	S003_T0__S172_T0	FALSE	S172	S003	FALSE	Pre-travel	Pre-travel	TRUE	Northern Africa	Southeastern Asia	FALSE
S183_T0	S003_T0	0.811364	S003_T0__S183_T0	FALSE	S183	S003	FALSE	Pre-travel	Pre-travel	TRUE	Southern Asia	Southeastern Asia	FALSE
S099_T1	S003_T0	0.842978	S003_T0__S099_T1	FALSE	S099	S003	FALSE	Post-travel	Pre-travel	FALSE	Southern Asia	Southeastern Asia	FALSE
S060_T0	S003_T0	0.636403	S003_T0__S060_T0	FALSE	S060	S003	FALSE	Pre-travel	Pre-travel	TRUE	Eastern Africa	Southeastern Asia	FALSE
S102_T0	S003_T0	0.821362	S003_T0__S102_T0	FALSE	S102	S003	FALSE	Pre-travel	Pre-travel	TRUE	Southeastern Asia	Southeastern Asia	TRUE
S042_T1	S003_T0	0.942519	S003_T0__S042_T1	FALSE	S042	S003	FALSE	Post-travel	Pre-travel	FALSE	Eastern Africa	Southeastern Asia	FALSE
S059_T1	S003_T0	0.855903	S003_T0__S059_T1	FALSE	S059	S003	FALSE	Post-travel	Pre-travel	FALSE	Southeastern Asia	Southeastern Asia	TRUE
S076_T0	S003_T0	0.48276	S003_T0__S076_T0	FALSE	S076	S003	FALSE	Pre-travel	Pre-travel	TRUE	Southeastern Asia	Southeastern Asia	TRUE
S049_T0	S003_T0	0.869082	S003_T0__S049_T0	FALSE	S049	S003	FALSE	Pre-travel	Pre-travel	TRUE	Northern Africa	Southeastern Asia	FALSE
S141_T0	S003_T0	0.656369	S003_T0__S141_T0	FALSE	S141	S003	FALSE	Pre-travel	Pre-travel	TRUE	Eastern Africa	Southeastern Asia	FALSE
S147_T0	S003_T0	0.685003	S003_T0__S147_T0	FALSE	S147	S003	FALSE	Pre-travel	Pre-travel	TRUE	Southern Asia	Southeastern Asia	FALSE
S078_T0	S003_T0	0.529975	S003_T0__S078_T0	FALSE	S078	S003	FALSE	Pre-travel	Pre-travel	TRUE	Eastern Africa	Southeastern Asia	FALSE
S184_T0	S003_T0	0.584599	S003_T0__S184_T0	FALSE	S184	S003	FALSE	Pre-travel	Pre-travel	TRUE	Northern Africa	Southeastern Asia	FALSE
S128_T0	S003_T0	0.927965	S003_T0__S128_T0	FALSE	S128	S003	FALSE	Pre-travel	Pre-travel	TRUE	Northern Africa	Southeastern Asia	FALSE
S031_T1	S003_T0	0.703876	S003_T0__S031_T1	FALSE	S031	S003	FALSE	Post-travel	Pre-travel	FALSE	Southern Asia	Southeastern Asia	FALSE
S171_T1	S003_T0	0.915457	S003_T0__S171_T1	FALSE	S171	S003	FALSE	Post-travel	Pre-travel	FALSE	Southeastern Asia	Southeastern Asia	TRUE
S148_T1	S003_T0	0.937202	S003_T0__S148_T1	FALSE	S148	S003	FALSE	Post-travel	Pre-travel	FALSE	Northern Africa	Southeastern Asia	FALSE
S100_T0	S003_T0	0.935755	S003_T0__S100_T0	FALSE	S100	S003	FALSE	Pre-travel	Pre-travel	TRUE	Southern Asia	Southeastern Asia	FALSE
S062_T0	S003_T0	0.608889	S003_T0__S062_T0	FALSE	S062	S003	FALSE	Pre-travel	Pre-travel	TRUE	Eastern Africa	Southeastern Asia	FALSE
S167_T1	S003_T0	0.583715	S003_T0__S167_T1	FALSE	S167	S003	FALSE	Post-travel	Pre-travel	FALSE	Eastern Africa	Southeastern Asia	FALSE
S094_T0	S003_T0	0.64085	S003_T0__S094_T0	FALSE	S094	S003	FALSE	Pre-travel	Pre-travel	TRUE	Northern Africa	Southeastern Asia	FALSE
S179_T1	S003_T0	0.881149	S003_T0__S179_T1	FALSE	S179	S003	FALSE	Post-travel	Pre-travel	FALSE	Southeastern Asia	Southeastern Asia	TRUE
S157_T1	S003_T0	0.708659	S003_T0__S157_T1	FALSE	S157	S003	FALSE	Post-travel	Pre-travel	FALSE	Southeastern Asia	Southeastern Asia	TRUE
S051_T0	S003_T0	0.5597	S003_T0__S051_T0	FALSE	S051	S003	FALSE	Pre-travel	Pre-travel	TRUE	Southern Asia	Southeastern Asia	FALSE
S021_T0	S003_T0	0.90005	S003_T0__S021_T0	FALSE	S021	S003	FALSE	Pre-travel	Pre-travel	TRUE	Northern Africa	Southeastern Asia	FALSE
S144_T0	S003_T0	0.931001	S003_T0__S144_T0	FALSE	S144	S003	FALSE	Pre-travel	Pre-travel	TRUE	Eastern Africa	Southeastern Asia	FALSE
S119_T0	S003_T0	0.78245	S003_T0__S119_T0	FALSE	S119	S003	FALSE	Pre-travel	Pre-travel	TRUE	Southeastern Asia	Southeastern Asia	TRUE
S106_T0	S003_T0	0.739778	S003_T0__S106_T0	FALSE	S106	S003	FALSE	Pre-travel	Pre-travel	TRUE	Southeastern Asia	Southeastern Asia	TRUE
S162_T0	S003_T0	0.810684	S003_T0__S162_T0	FALSE	S162	S003	FALSE	Pre-travel	Pre-travel	TRUE	Northern Africa	Southeastern Asia	FALSE
S138_T0	S003_T0	0.801118	S003_T0__S138_T0	FALSE	S138	S003	FALSE	Pre-travel	Pre-travel	TRUE	Southern Asia	Southeastern Asia	FALSE
S185_T0	S003_T0	0.603921	S003_T0__S185_T0	FALSE	S185	S003	FALSE	Pre-travel	Pre-travel	TRUE	Southeastern Asia	Southeastern Asia	TRUE
S086_T0	S003_T0	0.619242	S003_T0__S086_T0	FALSE	S086	S003	FALSE	Pre-travel	Pre-travel	TRUE	Northern Africa	Southeastern Asia	FALSE
S010_T0	S003_T0	0.56965	S003_T0__S010_T0	FALSE	S010	S003	FALSE	Pre-travel	Pre-travel	TRUE	Eastern Africa	Southeastern Asia	FALSE
S076_T1	S003_T0	0.677737	S003_T0__S076_T1	FALSE	S076	S003	FALSE	Post-travel	Pre-travel	FALSE	Southeastern Asia	Southeastern Asia	TRUE
S110_T0	S003_T0	0.923368	S003_T0__S110_T0	FALSE	S110	S003	FALSE	Pre-travel	Pre-travel	TRUE	Southeastern Asia	Southeastern Asia	TRUE
S170_T0	S003_T0	0.707585	S003_T0__S170_T0	FALSE	S170	S003	FALSE	Pre-travel	Pre-travel	TRUE	Southeastern Asia	Southeastern Asia	TRUE
S003_T1	S003_T0	0.508237	S003_T0__S003_T1	FALSE	S003	S003	TRUE	Post-travel	Pre-travel	FALSE	Southeastern Asia	Southeastern Asia	TRUE
S066_T0	S003_T0	0.594	S003_T0__S066_T0	FALSE	S066	S003	FALSE	Pre-travel	Pre-travel	TRUE	Eastern Africa	Southeastern Asia	FALSE
S131_T1	S003_T0	0.932018	S003_T0__S131_T1	FALSE	S131	S003	FALSE	Post-travel	Pre-travel	FALSE	Northern Africa	Southeastern Asia	FALSE
S037_T0	S003_T0	0.608175	S003_T0__S037_T0	FALSE	S037	S003	FALSE	Pre-travel	Pre-travel	TRUE	Southeastern Asia	Southeastern Asia	TRUE
S031_T0	S003_T0	0.898447	S003_T0__S031_T0	FALSE	S031	S003	FALSE	Pre-travel	Pre-travel	TRUE	Southern Asia	Southeastern Asia	FALSE
S152_T0	S003_T0	0.705367	S003_T0__S152_T0	FALSE	S152	S003	FALSE	Pre-travel	Pre-travel	TRUE	Eastern Africa	Southeastern Asia	FALSE
S105_T0	S003_T0	0.808103	S003_T0__S105_T0	FALSE	S105	S003	FALSE	Pre-travel	Pre-travel	TRUE	Eastern Africa	Southeastern Asia	FALSE
S114_T1	S003_T0	0.931861	S003_T0__S114_T1	FALSE	S114	S003	FALSE	Post-travel	Pre-travel	FALSE	Eastern Africa	Southeastern Asia	FALSE
S050_T0	S003_T0	0.590634	S003_T0__S050_T0	FALSE	S050	S003	FALSE	Pre-travel	Pre-travel	TRUE	Southern Asia	Southeastern Asia	FALSE
S053_T1	S003_T0	0.899217	S003_T0__S053_T1	FALSE	S053	S003	FALSE	Post-travel	Pre-travel	FALSE	Northern Africa	Southeastern Asia	FALSE
S078_T1	S003_T0	0.678083	S003_T0__S078_T1	FALSE	S078	S003	FALSE	Post-travel	Pre-travel	FALSE	Eastern Africa	Southeastern Asia	FALSE
S130_T0	S003_T0	0.872063	S003_T0__S130_T0	FALSE	S130	S003	FALSE	Pre-travel	Pre-travel	TRUE	Southeastern Asia	Southeastern Asia	TRUE
S060_T1	S003_T0	0.772526	S003_T0__S060_T1	FALSE	S060	S003	FALSE	Post-travel	Pre-travel	FALSE	Eastern Africa	Southeastern Asia	FALSE
S088_T0	S003_T0	0.97178	S003_T0__S088_T0	FALSE	S088	S003	FALSE	Pre-travel	Pre-travel	TRUE	Eastern Africa	Southeastern Asia	FALSE
S003_T0	S003_T0	0	S003_T0__S003_T0	TRUE	S003	S003	TRUE	Pre-travel	Pre-travel	TRUE	Southeastern Asia	Southeastern Asia	TRUE
S044_T1	S003_T0	0.928318	S003_T0__S044_T1	FALSE	S044	S003	FALSE	Post-travel	Pre-travel	FALSE	Southeastern Asia	Southeastern Asia	TRUE
S041_T0	S003_T0	0.8669	S003_T0__S041_T0	FALSE	S041	S003	FALSE	Pre-travel	Pre-travel	TRUE	Southern Asia	Southeastern Asia	FALSE
S081_T1	S003_T0	0.339523	S003_T0__S081_T1	FALSE	S081	S003	FALSE	Post-travel	Pre-travel	FALSE	Southeastern Asia	Southeastern Asia	TRUE
S057_T0	S003_T0	0.570801	S003_T0__S057_T0	FALSE	S057	S003	FALSE	Pre-travel	Pre-travel	TRUE	Southern Asia	Southeastern Asia	FALSE
S105_T1	S003_T0	0.755763	S003_T0__S105_T1	FALSE	S105	S003	FALSE	Post-travel	Pre-travel	FALSE	Eastern Africa	Southeastern Asia	FALSE
S121_T0	S003_T0	0.59754	S003_T0__S121_T0	FALSE	S121	S003	FALSE	Pre-travel	Pre-travel	TRUE	Eastern Africa	Southeastern Asia	FALSE
S140_T0	S003_T0	0.598747	S003_T0__S140_T0	FALSE	S140	S003	FALSE	Pre-travel	Pre-travel	TRUE	Southeastern Asia	Southeastern Asia	TRUE
S037_T1	S003_T0	0.371883	S003_T0__S037_T1	FALSE	S037	S003	FALSE	Post-travel	Pre-travel	FALSE	Southeastern Asia	Southeastern Asia	TRUE
S062_T1	S003_T0	0.889229	S003_T0__S062_T1	FALSE	S062	S003	FALSE	Post-travel	Pre-travel	FALSE	Eastern Africa	Southeastern Asia	FALSE
S070_T0	S003_T0	0.859747	S003_T0__S070_T0	FALSE	S070	S003	FALSE	Pre-travel	Pre-travel	TRUE	Southern Asia	Southeastern Asia	FALSE
S097_T1	S003_T0	0.852115	S003_T0__S097_T1	FALSE	S097	S003	FALSE	Post-travel	Pre-travel	FALSE	Eastern Africa	Southeastern Asia	FALSE
S093_T1	S003_T0	0.710513	S003_T0__S093_T1	FALSE	S093	S003	FALSE	Post-travel	Pre-travel	FALSE	Northern Africa	Southeastern Asia	FALSE
S018_T0	S003_T0	0.359776	S003_T0__S018_T0	FALSE	S018	S003	FALSE	Pre-travel	Pre-travel	TRUE	Eastern Africa	Southeastern Asia	FALSE
S074_T0	S003_T0	0.734482	S003_T0__S074_T0	FALSE	S074	S003	FALSE	Pre-travel	Pre-travel	TRUE	Northern Africa	Southeastern Asia	FALSE
S014_T1	S003_T0	0.905747	S003_T0__S014_T1	FALSE	S014	S003	FALSE	Post-travel	Pre-travel	FALSE	Northern Africa	Southeastern Asia	FALSE
S073_T0	S003_T0	0.6394	S003_T0__S073_T0	FALSE	S073	S003	FALSE	Pre-travel	Pre-travel	TRUE	Eastern Africa	Southeastern Asia	FALSE
S126_T0	S003_T0	0.651626	S003_T0__S126_T0	FALSE	S126	S003	FALSE	Pre-travel	Pre-travel	TRUE	Southeastern Asia	Southeastern Asia	TRUE
S038_T1	S003_T0	0.914559	S003_T0__S038_T1	FALSE	S038	S003	FALSE	Post-travel	Pre-travel	FALSE	Southeastern Asia	Southeastern Asia	TRUE
S015_T1	S003_T0	0.895678	S003_T0__S015_T1	FALSE	S015	S003	FALSE	Post-travel	Pre-travel	FALSE	Southern Asia	Southeastern Asia	FALSE
S096_T0	S003_T0	0.885577	S003_T0__S096_T0	FALSE	S096	S003	FALSE	Pre-travel	Pre-travel	TRUE	Eastern Africa	Southeastern Asia	FALSE
S047_T0	S003_T0	0.58104	S003_T0__S047_T0	FALSE	S047	S003	FALSE	Pre-travel	Pre-travel	TRUE	Southern Asia	Southeastern Asia	FALSE
S051_T1	S003_T0	0.555311	S003_T0__S051_T1	FALSE	S051	S003	FALSE	Post-travel	Pre-travel	FALSE	Southern Asia	Southeastern Asia	FALSE
S122_T0	S003_T0	0.901102	S003_T0__S122_T0	FALSE	S122	S003	FALSE	Pre-travel	Pre-travel	TRUE	Southeastern Asia	Southeastern Asia	TRUE
S176_T0	S003_T0	0.856494	S003_T0__S176_T0	FALSE	S176	S003	FALSE	Pre-travel	Pre-travel	TRUE	Northern Africa	Southeastern Asia	FALSE
S044_T0	S003_T0	0.894918	S003_T0__S044_T0	FALSE	S044	S003	FALSE	Pre-travel	Pre-travel	TRUE	Southeastern Asia	Southeastern Asia	TRUE
S167_T0	S003_T0	0.642789	S003_T0__S167_T0	FALSE	S167	S003	FALSE	Pre-travel	Pre-travel	TRUE	Eastern Africa	Southeastern Asia	FALSE
S149_T0	S003_T0	0.909645	S003_T0__S149_T0	FALSE	S149	S003	FALSE	Pre-travel	Pre-travel	TRUE	Eastern Africa	Southeastern Asia	FALSE
S049_T1	S003_T0	0.728031	S003_T0__S049_T1	FALSE	S049	S003	FALSE	Post-travel	Pre-travel	FALSE	Northern Africa	Southeastern Asia	FALSE
S095_T1	S003_T0	0.687185	S003_T0__S095_T1	FALSE	S095	S003	FALSE	Post-travel	Pre-travel	FALSE	Northern Africa	Southeastern Asia	FALSE
S182_T0	S003_T0	0.55585	S003_T0__S182_T0	FALSE	S182	S003	FALSE	Pre-travel	Pre-travel	TRUE	Northern Africa	Southeastern Asia	FALSE
S121_T1	S003_T0	0.844807	S003_T0__S121_T1	FALSE	S121	S003	FALSE	Post-travel	Pre-travel	FALSE	Eastern Africa	Southeastern Asia	FALSE
S032_T1	S003_T0	0.88037	S003_T0__S032_T1	FALSE	S032	S003	FALSE	Post-travel	Pre-travel	FALSE	Southeastern Asia	Southeastern Asia	TRUE
S133_T1	S003_T0	0.859607	S003_T0__S133_T1	FALSE	S133	S003	FALSE	Post-travel	Pre-travel	FALSE	Southeastern Asia	Southeastern Asia	TRUE
S127_T0	S003_T0	0.623532	S003_T0__S127_T0	FALSE	S127	S003	FALSE	Pre-travel	Pre-travel	TRUE	Southeastern Asia	Southeastern Asia	TRUE
S136_T1	S003_T0	0.632537	S003_T0__S136_T1	FALSE	S136	S003	FALSE	Post-travel	Pre-travel	FALSE	Southern Asia	Southeastern Asia	FALSE
S153_T0	S003_T0	0.924558	S003_T0__S153_T0	FALSE	S153	S003	FALSE	Pre-travel	Pre-travel	TRUE	Eastern Africa	Southeastern Asia	FALSE
S043_T0	S003_T0	0.733037	S003_T0__S043_T0	FALSE	S043	S003	FALSE	Pre-travel	Pre-travel	TRUE	Southeastern Asia	Southeastern Asia	TRUE
S137_T0	S003_T0	0.963732	S003_T0__S137_T0	FALSE	S137	S003	FALSE	Pre-travel	Pre-travel	TRUE	Southern Asia	Southeastern Asia	FALSE
S093_T0	S003_T0	0.865088	S003_T0__S093_T0	FALSE	S093	S003	FALSE	Pre-travel	Pre-travel	TRUE	Northern Africa	Southeastern Asia	FALSE
S124_T0	S003_T0	0.859518	S003_T0__S124_T0	FALSE	S124	S003	FALSE	Pre-travel	Pre-travel	TRUE	Southeastern Asia	Southeastern Asia	TRUE
S169_T0	S003_T0	0.913802	S003_T0__S169_T0	FALSE	S169	S003	FALSE	Pre-travel	Pre-travel	TRUE	Southern Asia	Southeastern Asia	FALSE
S018_T1	S003_T0	0.489387	S003_T0__S018_T1	FALSE	S018	S003	FALSE	Post-travel	Pre-travel	FALSE	Eastern Africa	Southeastern Asia	FALSE
S030_T1	S003_T0	0.933771	S003_T0__S030_T1	FALSE	S030	S003	FALSE	Post-travel	Pre-travel	FALSE	Southeastern Asia	Southeastern Asia	TRUE
S069_T0	S003_T0	0.487504	S003_T0__S069_T0	FALSE	S069	S003	FALSE	Pre-travel	Pre-travel	TRUE	Southern Asia	Southeastern Asia	FALSE
S118_T0	S003_T0	0.845099	S003_T0__S118_T0	FALSE	S118	S003	FALSE	Pre-travel	Pre-travel	TRUE	Southern Asia	Southeastern Asia	FALSE
S066_T1	S003_T0	0.868401	S003_T0__S066_T1	FALSE	S066	S003	FALSE	Post-travel	Pre-travel	FALSE	Eastern Africa	Southeastern Asia	FALSE
S166_T0	S003_T0	0.585761	S003_T0__S166_T0	FALSE	S166	S003	FALSE	Pre-travel	Pre-travel	TRUE	Southern Asia	Southeastern Asia	FALSE
S039_T0	S003_T0	0.49681	S003_T0__S039_T0	FALSE	S039	S003	FALSE	Pre-travel	Pre-travel	TRUE	Northern Africa	Southeastern Asia	FALSE
S045_T1	S003_T0	0.807799	S003_T0__S045_T1	FALSE	S045	S003	FALSE	Post-travel	Pre-travel	FALSE	Southern Asia	Southeastern Asia	FALSE
S114_T0	S003_T0	0.960701	S003_T0__S114_T0	FALSE	S114	S003	FALSE	Pre-travel	Pre-travel	TRUE	Eastern Africa	Southeastern Asia	FALSE
S085_T0	S003_T0	0.315592	S003_T0__S085_T0	FALSE	S085	S003	FALSE	Pre-travel	Pre-travel	TRUE	Southern Asia	Southeastern Asia	FALSE
S020_T0	S003_T0	0.816214	S003_T0__S020_T0	FALSE	S020	S003	FALSE	Pre-travel	Pre-travel	TRUE	Southeastern Asia	Southeastern Asia	TRUE
S166_T1	S003_T0	0.575513	S003_T0__S166_T1	FALSE	S166	S003	FALSE	Post-travel	Pre-travel	FALSE	Southern Asia	Southeastern Asia	FALSE
S084_T1	S003_T0	0.716337	S003_T0__S084_T1	FALSE	S084	S003	FALSE	Post-travel	Pre-travel	FALSE	Southeastern Asia	Southeastern Asia	TRUE
S084_T0	S003_T0	0.668546	S003_T0__S084_T0	FALSE	S084	S003	FALSE	Pre-travel	Pre-travel	TRUE	Southeastern Asia	Southeastern Asia	TRUE
S040_T1	S003_T0	0.890862	S003_T0__S040_T1	FALSE	S040	S003	FALSE	Post-travel	Pre-travel	FALSE	Northern Africa	Southeastern Asia	FALSE
S147_T1	S003_T0	0.854638	S003_T0__S147_T1	FALSE	S147	S003	FALSE	Post-travel	Pre-travel	FALSE	Southern Asia	Southeastern Asia	FALSE
S122_T1	S003_T0	0.855248	S003_T0__S122_T1	FALSE	S122	S003	FALSE	Post-travel	Pre-travel	FALSE	Southeastern Asia	Southeastern Asia	TRUE
S055_T1	S003_T0	0.715876	S003_T0__S055_T1	FALSE	S055	S003	FALSE	Post-travel	Pre-travel	FALSE	Eastern Africa	Southeastern Asia	FALSE
S161_T1	S003_T0	0.833071	S003_T0__S161_T1	FALSE	S161	S003	FALSE	Post-travel	Pre-travel	FALSE	Northern Africa	Southeastern Asia	FALSE
S133_T0	S003_T0	0.722559	S003_T0__S133_T0	FALSE	S133	S003	FALSE	Pre-travel	Pre-travel	TRUE	Southeastern Asia	Southeastern Asia	TRUE
S012_T0	S003_T0	0.931428	S003_T0__S012_T0	FALSE	S012	S003	FALSE	Pre-travel	Pre-travel	TRUE	Eastern Africa	Southeastern Asia	FALSE
S044_T0	S003_T1	0.737877	S003_T1__S044_T0	FALSE	S044	S003	FALSE	Pre-travel	Post-travel	FALSE	Southeastern Asia	Southeastern Asia	TRUE
S074_T0	S003_T1	0.560226	S003_T1__S074_T0	FALSE	S074	S003	FALSE	Pre-travel	Post-travel	FALSE	Northern Africa	Southeastern Asia	FALSE
S066_T0	S003_T1	0.748909	S003_T1__S066_T0	FALSE	S066	S003	FALSE	Pre-travel	Post-travel	FALSE	Eastern Africa	Southeastern Asia	FALSE
S169_T1	S003_T1	0.56482	S003_T1__S169_T1	FALSE	S169	S003	FALSE	Post-travel	Post-travel	TRUE	Southern Asia	Southeastern Asia	FALSE
S141_T0	S003_T1	0.764285	S003_T1__S141_T0	FALSE	S141	S003	FALSE	Pre-travel	Post-travel	FALSE	Eastern Africa	Southeastern Asia	FALSE
S147_T0	S003_T1	0.534098	S003_T1__S147_T0	FALSE	S147	S003	FALSE	Pre-travel	Post-travel	FALSE	Southern Asia	Southeastern Asia	FALSE
S089_T1	S003_T1	0.640747	S003_T1__S089_T1	FALSE	S089	S003	FALSE	Post-travel	Post-travel	TRUE	Eastern Africa	Southeastern Asia	FALSE
S038_T0	S003_T1	0.434917	S003_T1__S038_T0	FALSE	S038	S003	FALSE	Pre-travel	Post-travel	FALSE	Southeastern Asia	Southeastern Asia	TRUE
S012_T1	S003_T1	0.785932	S003_T1__S012_T1	FALSE	S012	S003	FALSE	Post-travel	Post-travel	TRUE	Eastern Africa	Southeastern Asia	FALSE
S082_T1	S003_T1	0.773684	S003_T1__S082_T1	FALSE	S082	S003	FALSE	Post-travel	Post-travel	TRUE	Northern Africa	Southeastern Asia	FALSE
S034_T0	S003_T1	0.725202	S003_T1__S034_T0	FALSE	S034	S003	FALSE	Pre-travel	Post-travel	FALSE	Southern Asia	Southeastern Asia	FALSE
S160_T1	S003_T1	0.651886	S003_T1__S160_T1	FALSE	S160	S003	FALSE	Post-travel	Post-travel	TRUE	Southeastern Asia	Southeastern Asia	TRUE
S006_T0	S003_T1	0.671655	S003_T1__S006_T0	FALSE	S006	S003	FALSE	Pre-travel	Post-travel	FALSE	Southern Asia	Southeastern Asia	FALSE
S018_T1	S003_T1	0.519787	S003_T1__S018_T1	FALSE	S018	S003	FALSE	Post-travel	Post-travel	TRUE	Eastern Africa	Southeastern Asia	FALSE
S130_T1	S003_T1	0.547951	S003_T1__S130_T1	FALSE	S130	S003	FALSE	Post-travel	Post-travel	TRUE	Southeastern Asia	Southeastern Asia	TRUE
S114_T1	S003_T1	0.799152	S003_T1__S114_T1	FALSE	S114	S003	FALSE	Post-travel	Post-travel	TRUE	Eastern Africa	Southeastern Asia	FALSE
S054_T1	S003_T1	0.509196	S003_T1__S054_T1	FALSE	S054	S003	FALSE	Post-travel	Post-travel	TRUE	Northern Africa	Southeastern Asia	FALSE
S158_T0	S003_T1	0.442381	S003_T1__S158_T0	FALSE	S158	S003	FALSE	Pre-travel	Post-travel	FALSE	Southern Asia	Southeastern Asia	FALSE
S100_T1	S003_T1	0.811267	S003_T1__S100_T1	FALSE	S100	S003	FALSE	Post-travel	Post-travel	TRUE	Southern Asia	Southeastern Asia	FALSE
S144_T0	S003_T1	0.80065	S003_T1__S144_T0	FALSE	S144	S003	FALSE	Pre-travel	Post-travel	FALSE	Eastern Africa	Southeastern Asia	FALSE
S031_T0	S003_T1	0.787855	S003_T1__S031_T0	FALSE	S031	S003	FALSE	Pre-travel	Post-travel	FALSE	Southern Asia	Southeastern Asia	FALSE
S168_T1	S003_T1	0.482285	S003_T1__S168_T1	FALSE	S168	S003	FALSE	Post-travel	Post-travel	TRUE	Southern Asia	Southeastern Asia	FALSE
S057_T1	S003_T1	0.542466	S003_T1__S057_T1	FALSE	S057	S003	FALSE	Post-travel	Post-travel	TRUE	Southern Asia	Southeastern Asia	FALSE
S123_T0	S003_T1	0.406683	S003_T1__S123_T0	FALSE	S123	S003	FALSE	Pre-travel	Post-travel	FALSE	Eastern Africa	Southeastern Asia	FALSE
S092_T1	S003_T1	0.729309	S003_T1__S092_T1	FALSE	S092	S003	FALSE	Post-travel	Post-travel	TRUE	Northern Africa	Southeastern Asia	FALSE
S179_T1	S003_T1	0.67477	S003_T1__S179_T1	FALSE	S179	S003	FALSE	Post-travel	Post-travel	TRUE	Southeastern Asia	Southeastern Asia	TRUE
S161_T0	S003_T1	0.552133	S003_T1__S161_T0	FALSE	S161	S003	FALSE	Pre-travel	Post-travel	FALSE	Northern Africa	Southeastern Asia	FALSE
S134_T0	S003_T1	0.517325	S003_T1__S134_T0	FALSE	S134	S003	FALSE	Pre-travel	Post-travel	FALSE	Southeastern Asia	Southeastern Asia	TRUE
S152_T1	S003_T1	0.711063	S003_T1__S152_T1	FALSE	S152	S003	FALSE	Post-travel	Post-travel	TRUE	Eastern Africa	Southeastern Asia	FALSE
S099_T0	S003_T1	0.839025	S003_T1__S099_T0	FALSE	S099	S003	FALSE	Pre-travel	Post-travel	FALSE	Southern Asia	Southeastern Asia	FALSE
S064_T1	S003_T1	0.41383	S003_T1__S064_T1	FALSE	S064	S003	FALSE	Post-travel	Post-travel	TRUE	Southeastern Asia	Southeastern Asia	TRUE
S041_T0	S003_T1	0.666237	S003_T1__S041_T0	FALSE	S041	S003	FALSE	Pre-travel	Post-travel	FALSE	Southern Asia	Southeastern Asia	FALSE
S053_T1	S003_T1	0.611211	S003_T1__S053_T1	FALSE	S053	S003	FALSE	Post-travel	Post-travel	TRUE	Northern Africa	Southeastern Asia	FALSE
S155_T0	S003_T1	0.52033	S003_T1__S155_T0	FALSE	S155	S003	FALSE	Pre-travel	Post-travel	FALSE	Southern Asia	Southeastern Asia	FALSE
S163_T0	S003_T1	0.55324	S003_T1__S163_T0	FALSE	S163	S003	FALSE	Pre-travel	Post-travel	FALSE	Northern Africa	Southeastern Asia	FALSE
S188_T0	S003_T1	0.795442	S003_T1__S188_T0	FALSE	S188	S003	FALSE	Pre-travel	Post-travel	FALSE	Northern Africa	Southeastern Asia	FALSE
S099_T1	S003_T1	0.720821	S003_T1__S099_T1	FALSE	S099	S003	FALSE	Post-travel	Post-travel	TRUE	Southern Asia	Southeastern Asia	FALSE
S075_T1	S003_T1	0.540769	S003_T1__S075_T1	FALSE	S075	S003	FALSE	Post-travel	Post-travel	TRUE	Northern Africa	Southeastern Asia	FALSE
S083_T1	S003_T1	0.692638	S003_T1__S083_T1	FALSE	S083	S003	FALSE	Post-travel	Post-travel	TRUE	Northern Africa	Southeastern Asia	FALSE
S032_T1	S003_T1	0.648287	S003_T1__S032_T1	FALSE	S032	S003	FALSE	Post-travel	Post-travel	TRUE	Southeastern Asia	Southeastern Asia	TRUE
S103_T0	S003_T1	0.679281	S003_T1__S103_T0	FALSE	S103	S003	FALSE	Pre-travel	Post-travel	FALSE	Northern Africa	Southeastern Asia	FALSE
S068_T0	S003_T1	0.738556	S003_T1__S068_T0	FALSE	S068	S003	FALSE	Pre-travel	Post-travel	FALSE	Eastern Africa	Southeastern Asia	FALSE
S060_T1	S003_T1	0.56422	S003_T1__S060_T1	FALSE	S060	S003	FALSE	Post-travel	Post-travel	TRUE	Eastern Africa	Southeastern Asia	FALSE
S057_T0	S003_T1	0.675733	S003_T1__S057_T0	FALSE	S057	S003	FALSE	Pre-travel	Post-travel	FALSE	Southern Asia	Southeastern Asia	FALSE
S183_T0	S003_T1	0.600892	S003_T1__S183_T0	FALSE	S183	S003	FALSE	Pre-travel	Post-travel	FALSE	Southern Asia	Southeastern Asia	FALSE
S052_T1	S003_T1	0.588532	S003_T1__S052_T1	FALSE	S052	S003	FALSE	Post-travel	Post-travel	TRUE	Southeastern Asia	Southeastern Asia	TRUE
S066_T1	S003_T1	0.700887	S003_T1__S066_T1	FALSE	S066	S003	FALSE	Post-travel	Post-travel	TRUE	Eastern Africa	Southeastern Asia	FALSE
S080_T1	S003_T1	0.357648	S003_T1__S080_T1	FALSE	S080	S003	FALSE	Post-travel	Post-travel	TRUE	Southeastern Asia	Southeastern Asia	TRUE
S037_T0	S003_T1	0.402889	S003_T1__S037_T0	FALSE	S037	S003	FALSE	Pre-travel	Post-travel	FALSE	Southeastern Asia	Southeastern Asia	TRUE
S080_T0	S003_T1	0.595814	S003_T1__S080_T0	FALSE	S080	S003	FALSE	Pre-travel	Post-travel	FALSE	Southeastern Asia	Southeastern Asia	TRUE
S139_T1	S003_T1	0.740754	S003_T1__S139_T1	FALSE	S139	S003	FALSE	Post-travel	Post-travel	TRUE	Southeastern Asia	Southeastern Asia	TRUE
S121_T1	S003_T1	0.62662	S003_T1__S121_T1	FALSE	S121	S003	FALSE	Post-travel	Post-travel	TRUE	Eastern Africa	Southeastern Asia	FALSE
S010_T0	S003_T1	0.753614	S003_T1__S010_T0	FALSE	S010	S003	FALSE	Pre-travel	Post-travel	FALSE	Eastern Africa	Southeastern Asia	FALSE
S028_T0	S003_T1	0.565282	S003_T1__S028_T0	FALSE	S028	S003	FALSE	Pre-travel	Post-travel	FALSE	Southeastern Asia	Southeastern Asia	TRUE
S078_T0	S003_T1	0.725545	S003_T1__S078_T0	FALSE	S078	S003	FALSE	Pre-travel	Post-travel	FALSE	Eastern Africa	Southeastern Asia	FALSE
S137_T1	S003_T1	0.74385	S003_T1__S137_T1	FALSE	S137	S003	FALSE	Post-travel	Post-travel	TRUE	Southern Asia	Southeastern Asia	FALSE
S096_T0	S003_T1	0.646786	S003_T1__S096_T0	FALSE	S096	S003	FALSE	Pre-travel	Post-travel	FALSE	Eastern Africa	Southeastern Asia	FALSE
S153_T1	S003_T1	0.639946	S003_T1__S153_T1	FALSE	S153	S003	FALSE	Post-travel	Post-travel	TRUE	Eastern Africa	Southeastern Asia	FALSE
S096_T1	S003_T1	0.43052	S003_T1__S096_T1	FALSE	S096	S003	FALSE	Post-travel	Post-travel	TRUE	Eastern Africa	Southeastern Asia	FALSE
S131_T0	S003_T1	0.573033	S003_T1__S131_T0	FALSE	S131	S003	FALSE	Pre-travel	Post-travel	FALSE	Northern Africa	Southeastern Asia	FALSE
S177_T0	S003_T1	0.764701	S003_T1__S177_T0	FALSE	S177	S003	FALSE	Pre-travel	Post-travel	FALSE	Southeastern Asia	Southeastern Asia	TRUE
S009_T1	S003_T1	0.58548	S003_T1__S009_T1	FALSE	S009	S003	FALSE	Post-travel	Post-travel	TRUE	Northern Africa	Southeastern Asia	FALSE
S023_T0	S003_T1	0.60721	S003_T1__S023_T0	FALSE	S023	S003	FALSE	Pre-travel	Post-travel	FALSE	Southern Asia	Southeastern Asia	FALSE
S111_T0	S003_T1	0.670839	S003_T1__S111_T0	FALSE	S111	S003	FALSE	Pre-travel	Post-travel	FALSE	Northern Africa	Southeastern Asia	FALSE
S182_T0	S003_T1	0.659391	S003_T1__S182_T0	FALSE	S182	S003	FALSE	Pre-travel	Post-travel	FALSE	Northern Africa	Southeastern Asia	FALSE
S121_T0	S003_T1	0.472682	S003_T1__S121_T0	FALSE	S121	S003	FALSE	Pre-travel	Post-travel	FALSE	Eastern Africa	Southeastern Asia	FALSE
S113_T0	S003_T1	0.72397	S003_T1__S113_T0	FALSE	S113	S003	FALSE	Pre-travel	Post-travel	FALSE	Eastern Africa	Southeastern Asia	FALSE
S094_T1	S003_T1	0.641679	S003_T1__S094_T1	FALSE	S094	S003	FALSE	Post-travel	Post-travel	TRUE	Northern Africa	Southeastern Asia	FALSE
S034_T1	S003_T1	0.711244	S003_T1__S034_T1	FALSE	S034	S003	FALSE	Post-travel	Post-travel	TRUE	Southern Asia	Southeastern Asia	FALSE
S025_T1	S003_T1	0.698823	S003_T1__S025_T1	FALSE	S025	S003	FALSE	Post-travel	Post-travel	TRUE	Southern Asia	Southeastern Asia	FALSE
S039_T1	S003_T1	0.782251	S003_T1__S039_T1	FALSE	S039	S003	FALSE	Post-travel	Post-travel	TRUE	Northern Africa	Southeastern Asia	FALSE
S156_T0	S003_T1	0.769908	S003_T1__S156_T0	FALSE	S156	S003	FALSE	Pre-travel	Post-travel	FALSE	Southeastern Asia	Southeastern Asia	TRUE
S140_T0	S003_T1	0.537019	S003_T1__S140_T0	FALSE	S140	S003	FALSE	Pre-travel	Post-travel	FALSE	Southeastern Asia	Southeastern Asia	TRUE
S141_T1	S003_T1	0.801831	S003_T1__S141_T1	FALSE	S141	S003	FALSE	Post-travel	Post-travel	TRUE	Eastern Africa	Southeastern Asia	FALSE
S058_T1	S003_T1	0.606015	S003_T1__S058_T1	FALSE	S058	S003	FALSE	Post-travel	Post-travel	TRUE	Southern Asia	Southeastern Asia	FALSE
S158_T1	S003_T1	0.538975	S003_T1__S158_T1	FALSE	S158	S003	FALSE	Post-travel	Post-travel	TRUE	Southern Asia	Southeastern Asia	FALSE
S033_T0	S003_T1	0.720852	S003_T1__S033_T0	FALSE	S033	S003	FALSE	Pre-travel	Post-travel	FALSE	Southern Asia	Southeastern Asia	FALSE
S180_T1	S003_T1	0.635461	S003_T1__S180_T1	FALSE	S180	S003	FALSE	Post-travel	Post-travel	TRUE	Southern Asia	Southeastern Asia	FALSE
S159_T1	S003_T1	0.700315	S003_T1__S159_T1	FALSE	S159	S003	FALSE	Post-travel	Post-travel	TRUE	Southern Asia	Southeastern Asia	FALSE
S106_T0	S003_T1	0.563217	S003_T1__S106_T0	FALSE	S106	S003	FALSE	Pre-travel	Post-travel	FALSE	Southeastern Asia	Southeastern Asia	TRUE
S011_T1	S003_T1	0.535641	S003_T1__S011_T1	FALSE	S011	S003	FALSE	Post-travel	Post-travel	TRUE	Southeastern Asia	Southeastern Asia	TRUE
S131_T1	S003_T1	0.740711	S003_T1__S131_T1	FALSE	S131	S003	FALSE	Post-travel	Post-travel	TRUE	Northern Africa	Southeastern Asia	FALSE
S122_T1	S003_T1	0.72136	S003_T1__S122_T1	FALSE	S122	S003	FALSE	Post-travel	Post-travel	TRUE	Southeastern Asia	Southeastern Asia	TRUE
S015_T1	S003_T1	0.721776	S003_T1__S015_T1	FALSE	S015	S003	FALSE	Post-travel	Post-travel	TRUE	Southern Asia	Southeastern Asia	FALSE
S135_T1	S003_T1	0.43971	S003_T1__S135_T1	FALSE	S135	S003	FALSE	Post-travel	Post-travel	TRUE	Southern Asia	Southeastern Asia	FALSE
S086_T0	S003_T1	0.68473	S003_T1__S086_T0	FALSE	S086	S003	FALSE	Pre-travel	Post-travel	FALSE	Northern Africa	Southeastern Asia	FALSE
S120_T0	S003_T1	0.673514	S003_T1__S120_T0	FALSE	S120	S003	FALSE	Pre-travel	Post-travel	FALSE	Southern Asia	Southeastern Asia	FALSE
S126_T0	S003_T1	0.449802	S003_T1__S126_T0	FALSE	S126	S003	FALSE	Pre-travel	Post-travel	FALSE	Southeastern Asia	Southeastern Asia	TRUE
S073_T1	S003_T1	0.495077	S003_T1__S073_T1	FALSE	S073	S003	FALSE	Post-travel	Post-travel	TRUE	Eastern Africa	Southeastern Asia	FALSE
S178_T1	S003_T1	0.511483	S003_T1__S178_T1	FALSE	S178	S003	FALSE	Post-travel	Post-travel	TRUE	Eastern Africa	Southeastern Asia	FALSE
S048_T1	S003_T1	0.726727	S003_T1__S048_T1	FALSE	S048	S003	FALSE	Post-travel	Post-travel	TRUE	Northern Africa	Southeastern Asia	FALSE
S042_T1	S003_T1	0.814712	S003_T1__S042_T1	FALSE	S042	S003	FALSE	Post-travel	Post-travel	TRUE	Eastern Africa	Southeastern Asia	FALSE
S116_T0	S003_T1	0.50372	S003_T1__S116_T0	FALSE	S116	S003	FALSE	Pre-travel	Post-travel	FALSE	Southeastern Asia	Southeastern Asia	TRUE
S160_T0	S003_T1	0.593557	S003_T1__S160_T0	FALSE	S160	S003	FALSE	Pre-travel	Post-travel	FALSE	Southeastern Asia	Southeastern Asia	TRUE
S048_T0	S003_T1	0.712338	S003_T1__S048_T0	FALSE	S048	S003	FALSE	Pre-travel	Post-travel	FALSE	Northern Africa	Southeastern Asia	FALSE
S076_T1	S003_T1	0.438104	S003_T1__S076_T1	FALSE	S076	S003	FALSE	Post-travel	Post-travel	TRUE	Southeastern Asia	Southeastern Asia	TRUE
S028_T1	S003_T1	0.587416	S003_T1__S028_T1	FALSE	S028	S003	FALSE	Post-travel	Post-travel	TRUE	Southeastern Asia	Southeastern Asia	TRUE
S008_T1	S003_T1	0.548267	S003_T1__S008_T1	FALSE	S008	S003	FALSE	Post-travel	Post-travel	TRUE	Northern Africa	Southeastern Asia	FALSE
S004_T0	S003_T1	0.695931	S003_T1__S004_T0	FALSE	S004	S003	FALSE	Pre-travel	Post-travel	FALSE	Southeastern Asia	Southeastern Asia	TRUE
S081_T0	S003_T1	0.698067	S003_T1__S081_T0	FALSE	S081	S003	FALSE	Pre-travel	Post-travel	FALSE	Southeastern Asia	Southeastern Asia	TRUE
S049_T0	S003_T1	0.699632	S003_T1__S049_T0	FALSE	S049	S003	FALSE	Pre-travel	Post-travel	FALSE	Northern Africa	Southeastern Asia	FALSE
S020_T1	S003_T1	0.819502	S003_T1__S020_T1	FALSE	S020	S003	FALSE	Post-travel	Post-travel	TRUE	Southeastern Asia	Southeastern Asia	TRUE
S058_T0	S003_T1	0.76363	S003_T1__S058_T0	FALSE	S058	S003	FALSE	Pre-travel	Post-travel	FALSE	Southern Asia	Southeastern Asia	FALSE
S031_T1	S003_T1	0.475373	S003_T1__S031_T1	FALSE	S031	S003	FALSE	Post-travel	Post-travel	TRUE	Southern Asia	Southeastern Asia	FALSE
S172_T0	S003_T1	0.513365	S003_T1__S172_T0	FALSE	S172	S003	FALSE	Pre-travel	Post-travel	FALSE	Northern Africa	Southeastern Asia	FALSE
S044_T1	S003_T1	0.700575	S003_T1__S044_T1	FALSE	S044	S003	FALSE	Post-travel	Post-travel	TRUE	Southeastern Asia	Southeastern Asia	TRUE
S082_T0	S003_T1	0.738641	S003_T1__S082_T0	FALSE	S082	S003	FALSE	Pre-travel	Post-travel	FALSE	Northern Africa	Southeastern Asia	FALSE
S105_T0	S003_T1	0.680543	S003_T1__S105_T0	FALSE	S105	S003	FALSE	Pre-travel	Post-travel	FALSE	Eastern Africa	Southeastern Asia	FALSE
S179_T0	S003_T1	0.42726	S003_T1__S179_T0	FALSE	S179	S003	FALSE	Pre-travel	Post-travel	FALSE	Southeastern Asia	Southeastern Asia	TRUE
[truncated: 70,391 more rows]

## Sheet: 2C_CIs
Timepoint_1	bray_dist.upper	bray_dist.mean	bray_dist.lower
Pre-travel	0.686388	0.683639	0.680891
Post-travel	0.619963	0.617372	0.614781

## Sheet: 4C_CIs
Travel_destination_subregion	Pre-travel	Post-travel	difference	fc	bca_ci_low	bca_ci_high	Significant
Northern Africa	0.688493	0.634056	-0.0544364	-1.08585	-0.0700825	-0.0390138	TRUE
Eastern Africa	0.692344	0.600889	-0.0914545	-1.1522	-0.107634	-0.0755439	TRUE
Southern Asia	0.690599	0.630432	-0.0601668	-1.09544	-0.0719069	-0.0474982	TRUE
Southeastern Asia	0.673984	0.584982	-0.0890017	-1.15214	-0.101807	-0.0764816	TRUE

[truncated: 47 more sheets: 3A, 3B_nodes, 3B_edges, 3B_CIs, 3B_piecharts, 3B_AIC_Laplace, 3B_sampleClusterProbabilities, S3A, S3B & S3C, 5A, 5B_T0_significance, 5B_T1_significance, 5B_T0_AIC_Laplace, 5B_T0_sampleClusterProbability, 5B_T1_AIC_Laplace, 5B_T1_sampleClusterProbability, 6A, 6A_CIs, 6B, 6B_CIs …]
